# Supplementary material for: Added Value of Clinical Sequencing: WGS-Based Profiling of Pharmacogenes
Source: Int J Mol Sci. 2020 Mar 26;21(7):2308. doi: 10.3390/ijms21072308 (PMC7178228; doi:10.3390/ijms21072308)
Supplement: Supplementary file 1 [file ijms-21-02308-s001.zip]

Archive with 4 entries (4 files):
- Caspar_et_al_Supplementary_Material.doc
- Caspar_et_al_Supplementary_Material.pdf
- Caspar_et_al_Supplementary_Table_S1.xlsx
- Caspar_et_al_Supplementary_Table_S2.xlsx
