# Supplementary material for: Added Value of Clinical Sequencing: WGS-Based Profiling of Pharmacogenes
Source: Int J Mol Sci. 2020 Mar 26;21(7):2308. doi: 10.3390/ijms21072308 (PMC7178228; doi:10.3390/ijms21072308)
Supplement: Supplementary file 1 [file ijms-21-02308-s001.zip › Caspar_et_al_Supplementary_Table_S1.xlsx]

## Sheet: gnomAD_Exomes_LOF
Variant Info		RefSeq Genes 105 Interim v1, NCBI				dbNSFP Functional Prediction Voting	dbNSFP Functional Predictions and Scores 2.9, GHI			CADD Scores 1.4	dbscSNV Splice Altering Predictions 1.1, GHI		ClinVar 2019-11-01, NCBI		HGMD_PRO_2019.4		PharmGKB Variants 2019-06-19, GHI				dbSNP 153, NCBI	Mappability_M150m2_hg19_Interval	gnomAD Exomes Variant Frequencies 2.1.1, BROAD
Chr:Pos	Ref/Alt	Gene Names	Sequence Ontology (Combined)	HGVS c. (Clinically Relevant)	HGVS p. (Clinically Relevant)	N of 6 Predicted Damaging	PhyloP 100way Vertebrate	PhastCons 100way Vertebrate	SiPhy 29way logOdds	PHRED Score	Ada Score	RF Score	Clinical Significance	Review Status (per Condition)	CLASS	PHEN	Drugs	Phenotype Category	Summary	Level of Evidence	Identifier	Mappability	Filter	AltAlleleFreqAF	AltAlleleCountAC	AllelesAN	HomozgyousCountHom	EuropeanNonFinnishAlleleCountAC_NFE	EuropeanNonFinnishChromosomeCountAN_NFE	EuropeanNonFinnishHomozygousCountHom_NFE	BulgarianAlleleCountAC_NFE_BGR	BulgarianChromosomeCountAN_NFE_BGR	BulgarianHomozygousCountHom_NFE_BGR	EstonianAlleleCountAC_NFE_EST	EstonianChromosomeCountAN_NFE_EST	EstonianHomozygousCountHom_NFE_EST	NorthWesternEuropeanAlleleCountAC_NFE_NWE	NorthWesternEuropeanChromosomeCountAN_NFE_NWE	NorthWesternEuropeanHomozygousCountHom_NFE_NWE	SouthernEuropeanAlleleCountAC_NFE_SEU	SouthernEuropeanChromosomeCountAN_NFE_SEU	SouthernEuropeanHomozygousCountHom_NFE_SEU	SwedishAlleleCountAC_NFE_SWE	SwedishChromosomeCountAN_NFE_SWE	SwedishHomozygousCountHom_NFE_SWE	OtherEuropeanAlleleCountAC_NFE_ONF	OtherEuropeanChromosomeCountAN_NFE_ONF	OtherEuropeanHomozygousCountHom_NFE_ONF	AfricanAlleleCountAC_AFR
LOF/Missense variants listed in ClinVar/HGMD/PharmGKB in the context of drug response
19:41518370	C/T	CYP2B6	stop_gained	NM_000767.4:c.1132C>T	NP_000758.1:p.Arg378Ter	1 of 6 Predicted as Damaging	-0.553	0.003	5.8902	37			Drug Response	(0 Stars) No Assertion Criteria Provided	FP	"Impaired_efavirenz_metabolism"	efavirenz,non-nucleoside reverse transcriptase inhibitors	efficacy	Allele C is not associated with response to efavirenz or non-nucleoside reverse transcriptase inhibitors in women with HIV as compared to genotype TT.		rs34097093	1	PASS	0.00010747	27	251234	0	2	113538	0	0	2668	0	0	242	0	1	42084	0	1	11484	0	0	26130	0	0	30930	0	9
10:96709039	A/-	CYP2C9	frameshift_variant	NM_000771.3:c.818delA	NP_000762.2:p.Lys273Argfs*34					22.9			Drug Response, Other	(1 Stars) Criteria Provided, Single Submitter,(1 Stars) Criteria Provided, Single Submitter,(1 Stars) Criteria Provided, Single Submitter,(1 Stars) Criteria Provided, Single Submitter	FP	"Poor_metaboliser"	warfarin,phenytoin,warfarin,warfarin	dosage,other,metabolism/PK,dosage,dosage,efficacy	Genotype DEL is associated with decreased dose of warfarin.,Genotype DEL is associated with decreased metabolism of phenytoin in people with no disease as compared to genotype AA.,Allele A is associated with dose of warfarin as compared to allele del.,Allele del is associated with decreased dose of warfarin in Pulmonary Embolism as compared to allele A.	3,3,3,3	rs9332131	1	PASS	0.000757157	189	249618	1	1	113128	0	0	2666	0	0	240	0	0	41854	0	1	11466	0	0	26100	0	0	30802	0	171
10:96741038	G/A	CYP2C9	missense_variant	NM_000771.3:c.1060G>A	NP_000762.2:p.Glu354Lys	6 of 6 Predicted as Damaging	6.658	1	9.3127	23.6					FP	"Poor_metaboliser"					rs749060448	1	PASS	3.98191e-06	1	251136	0	0	113570	0	0	2668	0	0	242	0	0	42114	0	0	11488	0	0	26132	0	0	30926	0	0
22:42522581	G/A	CYP2D6	missense_variant	NM_000106.5:c.1489C>T	NP_000097.3:p.Arg497Cys	6 of 6 Predicted as Damaging	2.631	1	9.1785	25.4					FP	"Poor_metaboliser"					rs370580423	1	PASS	4.73469e-05	11	232328	0	1	105708	0	0	2568	0	0	232	0	0	38242	0	0	10996	0	1	25444	0	0	28226	0	0
22:42523592	G/A	CYP2D6	stop_gained	NM_000106.5:c.1030C>T	NP_000097.3:p.Arg344Ter	1 of 6 Predicted as Damaging	-0.459		5.2667	35					FP	"Poor_metaboliser"					rs72549347	1	PASS	0.000159375	40	250980	0	5	113494	0	0	2662	0	0	238	0	1	42146	0	0	11480	0	0	26050	0	4	30918	0	25
22:42523848	CACATCCGGATGTAGGATC/-	CYP2D6	frameshift_variant	NM_000106.5:c.963_981del	NP_000097.3:p.Met321Ilefs*12					34			Drug Response	(0 Stars) No Assertion Criteria Provided							rs730882170	1	PASS	4.38422e-05	11	250900	0	1	113424	0	0	2662	0	0	238	0	0	42064	0	1	11494	0	0	26064	0	0	30902	0	0
22:42523855	G/A	CYP2D6	missense_variant	NM_000106.5:c.974C>T	NP_000097.3:p.Pro325Leu	6 of 6 Predicted as Damaging	5.439	1	12.9771	25.3					gnom	"Poor_metaboliser"					rs140513104	1	PASS	0.000231149	58	250920	0	12	113478	0	0	2656	0	0	240	0	4	42102	0	3	11490	0	1	26064	0	4	30926	0	9
22:42526657	-/A	CYP2D6	frameshift_variant	NM_000106.5:c.137dupT	NP_000097.3:p.Leu47Alafs*207					24.7			Likely Benign	(1 Stars) Criteria Provided, Single Submitter	FP	"Poor_metaboliser"					rs774671100	1	PASS	7.69561e-05	19	246894	0	14	111004	0	0	2592	0	0	236	0	12	41078	0	1	11284	0	0	25540	0	1	30274	0	4
7:99247737	C/-	CYP3A5	frameshift_variant	NM_000777.4:c.1372delG	NP_000768.1:p.Val458Serfs*17					21.6					DP	"CYP3A5_deficiency_association_with"					rs547253411	1	PASS	0.00105393	265	251440	0	235	113732	0	1	2668	0	0	242	0	89	42204	0	7	11502	0	67	26132	0	71	30984	0	3
7:99264573	A/G	CYP3A5	splice_donor_variant	NM_000777.4:c.432+2T>C		2 of 6 Predicted as Damaging	6.447	1	10.6799	27.8	0.984783	0.574			FP	"Altered_gene_expression"					rs55965422	1	PASS	0.000465564	117	251308	0	0	113680	0	0	2668	0	0	242	0	0	42186	0	0	11494	0	0	26114	0	0	30976	0	0
7:99270274	-/C	CYP3A5	frameshift_variant	NM_000777.4:c.247dupG	NP_000768.1:p.Ala83Glyfs*40					15.89					DM?	"Breast_cancer"					rs753330469	1	PASS	0.000155177	39	251326	0	38	113618	0	3	2668	0	0	242	0	5	42132	0	0	11494	0	15	26134	0	15	30948	0	0
7:99273811	-/C	CYP3A5	frameshift_variant	NM_000777.4:c.92dupG	NP_000768.1:p.Leu32Thrfs*3					16.6					DP	"CYP3A5_deficiency_association_with"						1	PASS	0.00692322	1740	251328	11	1169	113652	6	26	2668	0	1	240	0	374	42170	0	133	11496	2	337	26126	3	298	30952	1	30
1:97547921	T/C	DPYD	missense_variant	NM_000110.3:c.2872A>G	NP_000101.2:p.Lys958Glu	6 of 6 Predicted as Damaging	7.841	1	16.1779	29.8			Uncertain Significance	(1 Stars) Criteria Provided, Single Submitter	FP	"Reduced_enzyme_activity"	fluorouracil	metabolism/PK	Allele C is associated with decreased activity of DPYD when assayed with fluorouracil as compared to allele T.		rs141044036	1	PASS	1.99e-05	5	251256	0	5	113578	0	0	2670	0	0	242	0	4	42102	0	0	11490	0	1	26134	0	0	30940	0	0
1:97547950	A/G	DPYD	missense_variant	NM_000110.3:c.2843T>C	NP_000101.2:p.Ile948Thr	6 of 6 Predicted as Damaging	9.108	1	16.1779	26					DM	"Dihydropyrimidine_dehydrogenase_deficiency"					rs372307932	1	PASS	3.98007e-06	1	251252	0	0	113584	0	0	2670	0	0	242	0	0	42122	0	0	11488	0	0	26128	0	0	30934	0	0
1:97564154	C/T	DPYD	missense_variant	NM_000110.3:c.2657G>A	NP_000101.2:p.Arg886His	6 of 6 Predicted as Damaging	3.778	1	13.4021	27.6			Uncertain Significance	(1 Stars) Criteria Provided, Single Submitter	DM	"Dihydropyrimidine_dehydrogenase_deficiency_partial"	,,fluorouracil	metabolism/PK,metabolism/PK,toxicity	Allele T is associated with decreased activity of DPYD.,Allele T is associated with decreased catalytic activity of DPYD.,Allele T is not associated with severity of Drug Toxicity when treated with fluorouracil in people with Colonic Neoplasms as compared to allele C.	,,	rs1801267	1	PASS	4.39438e-05	11	250320	0	2	112934	0	1	2666	0	0	240	0	0	41832	0	0	11438	0	1	26064	0	0	30694	0	0
1:97564155	G/A	DPYD	missense_variant	NM_000110.3:c.2656C>T	NP_000101.2:p.Arg886Cys	6 of 6 Predicted as Damaging	4.875	1	18.2848	32							fluorouracil	metabolism/PK	Allele A is not associated with activity of DPYD when assayed with fluorouracil as compared to allele G.		rs147545709	1	PASS	0.000323612	81	250300	1	32	112910	1	0	2664	0	0	240	0	3	41810	0	1	11436	0	27	26056	1	1	30704	0	4
1:97770839	G/A	DPYD	stop_gained	NM_000110.3:c.2275C>T	NP_000101.2:p.Arg759Ter	2 of 6 Predicted as Damaging	2.619	1	15.1226	36			Pathogenic/Likely Pathogenic	(2 Stars) Criteria Provided, Multiple Submitters, No Conflicts	DM	"Dihydropyrimidine_dehydrogenase_deficiency"					rs759372918	1	PASS	2.79171e-05	7	250742	0	3	113242	0	0	2668	0	0	242	0	2	41914	0	0	11466	0	0	26118	0	1	30834	0	0
1:97770928	G/A	DPYD	missense_variant	NM_000110.3:c.2186C>T	NP_000101.2:p.Ala729Val	6 of 6 Predicted as Damaging	9.416	1	19.8696	26.5			Uncertain Significance	(1 Stars) Criteria Provided, Single Submitter			fluorouracil	metabolism/PK	Allele A is not associated with activity of DPYD when assayed with fluorouracil as compared to allele G.		rs146529561	1	PASS	7.96972e-06	2	250950	0	1	113414	0	0	2668	0	0	242	0	0	42012	0	0	11476	0	0	26118	0	1	30898	0	0
1:97839117	CTGCCCACAGGCCAGG/-	DPYD	frameshift_variant	NM_000110.3:c.2043_2058del	NP_000101.2:p.Leu682Ilefs*24					35			Likely Pathogenic	(2 Stars) Criteria Provided, Multiple Submitters, No Conflicts	DM	"Dihydropyrimidine_dehydrogenase_deficiency"					rs773499329	1	PASS	0.000131662	33	250642	1	0	113168	0	0	2668	0	0	240	0	0	41910	0	0	11456	0	0	26078	0	0	30816	0	0
1:97839185	C/A	DPYD	missense_variant	NM_000110.3:c.1990G>T	NP_000101.2:p.Ala664Ser	6 of 6 Predicted as Damaging	7.094	1	19.9003	31							fluorouracil	metabolism/PK	Allele A is not associated with activity of DPYD when assayed with fluorouracil as compared to allele C.		rs138545885	1	PASS	2.39074e-05	6	250968	0	0	113376	0	0	2668	0	0	242	0	0	42002	0	0	11478	0	0	26110	0	0	30876	0	6
1:97915614	C/G	DPYD	splice_donor_variant	NM_000110.3:c.1905+1G>C		2 of 6 Predicted as Damaging	7.487	1	18.9863	29.7	0.999946	0.952					fluorouracil,fluorouracil,capecitabine,fluorouracil,fluorouracil,fluorouracil,capecitabine,capecitabine,capecitabine,fluorouracil,,fluorouracil,,capecitabine,fluorouracil,capecitabine,fluorouracil,fluorouracil,fluorouracil,fluorouracil,fluorouracil,,tegafur,fluorouracil,capecitabine,fluorouracil,fluorouracil,,fluorouracil,capecitabine,fluorouracil,fluorouracil,capecitabine,capecitabine,fluorourac…	other,metabolism/PK,toxicity,metabolism/PK,dosage,metabolism/PK,efficacy,toxicity,dosage,dosage,other,other,other,metabolism/PK,toxicity,toxicity,toxicity,toxicity,toxicity,toxicity,toxicity,metabolism/PK,toxicity,toxicity,toxicity,toxicity,metabolism/PK,toxicity,toxicity,toxicity,toxicity,toxicity,toxicity,toxicity,toxicity,toxicity,toxicity,toxicity,toxicity,toxicity,toxicity,toxicity,toxicity,…	Genotype CT is associated with decreased metabolism of fluorouracil in people with Neoplasms as compared to genotype CC.,Genotype CT is associated with decreased clearance of fluorouracil in people with Colorectal Neoplasms as compared to genotype CC.,Genotype CT is associated with dose of capecitabine or fluorouracil in people with Colorectal Neoplasms as compared to genotype CC.,Genotype CT is …	1A,1A,1A,1A,1A,1A,1A,1A,1A,1A,1A,1A,1A,1A,1A,1A,1A,1A,1A,1A,1A,1A,1A,1A,1A,1A,1A,1A,1A,1A,1A,1A,1A,1A,1A,1A,1A,1A,1A,1A,1A,1A,1A,1A,1A,1A,1A,1A,1A,1A,1A,1A,1A,1A,1A,1A,1A,1A,1A,1A,1A,1A	rs3918290	1	PASS	7.95988e-06	2	251260	0	1	113626	0	0	2668	0	0	242	0	0	42144	0	0	11492	0	0	26128	0	1	30952	0	0
1:97915614	C/T	DPYD	splice_donor_variant	NM_000110.3:c.1905+1G>A		2 of 6 Predicted as Damaging	7.487	1	18.9863	31	0.999946	0.946	Drug Response	(1 Star) Criteria Provided, Conflicting Interpretations,(1 Stars) Criteria Provided, Single Submitter,(2 Stars) Criteria Provided, Multiple Submitters, No Conflicts,(0 Stars) No Assertion Criteria Provided,(3 Stars) Reviewed By Expert Panel,(3 Stars) Reviewed By Expert Panel,(3 Stars) Reviewed By Expert Panel,(3 Stars) Reviewed By Expert Panel,(1 Stars) Criteria Provided, Single Submitter	DM	"Dihydropyrimidine_dehydrogenase_deficiency"	fluorouracil,fluorouracil,capecitabine,fluorouracil,fluorouracil,fluorouracil,capecitabine,capecitabine,capecitabine,fluorouracil,,fluorouracil,,capecitabine,fluorouracil,capecitabine,fluorouracil,fluorouracil,fluorouracil,fluorouracil,fluorouracil,,tegafur,fluorouracil,capecitabine,fluorouracil,fluorouracil,,fluorouracil,capecitabine,fluorouracil,fluorouracil,capecitabine,capecitabine,fluorourac…	other,metabolism/PK,toxicity,metabolism/PK,dosage,metabolism/PK,efficacy,toxicity,dosage,dosage,other,other,other,metabolism/PK,toxicity,toxicity,toxicity,toxicity,toxicity,toxicity,toxicity,metabolism/PK,toxicity,toxicity,toxicity,toxicity,metabolism/PK,toxicity,toxicity,toxicity,toxicity,toxicity,toxicity,toxicity,toxicity,toxicity,toxicity,toxicity,toxicity,toxicity,toxicity,toxicity,toxicity,…	Genotype CT is associated with decreased metabolism of fluorouracil in people with Neoplasms as compared to genotype CC.,Genotype CT is associated with decreased clearance of fluorouracil in people with Colorectal Neoplasms as compared to genotype CC.,Genotype CT is associated with dose of capecitabine or fluorouracil in people with Colorectal Neoplasms as compared to genotype CC.,Genotype CT is …	1A,1A,1A,1A,1A,1A,1A,1A,1A,1A,1A,1A,1A,1A,1A,1A,1A,1A,1A,1A,1A,1A,1A,1A,1A,1A,1A,1A,1A,1A,1A,1A,1A,1A,1A,1A,1A,1A,1A,1A,1A,1A,1A,1A,1A,1A,1A,1A,1A,1A,1A,1A,1A,1A,1A,1A,1A,1A,1A,1A,1A,1A	rs3918290	1	PASS	0.00559182	1405	251260	9	622	113626	1	12	2668	0	1	242	0	204	42144	0	41	11492	1	219	26128	0	145	30952	0	11
1:97915670	G/A	DPYD	missense_variant	NM_000110.3:c.1850C>T	NP_000101.2:p.Thr617Met	6 of 6 Predicted as Damaging	9.476	1	18.9863	27.1					DM?	"Dihydropyrimidine_dehydrogenase_deficiency"					rs753707032	1	PASS	1.59157e-05	4	251324	0	2	113670	0	0	2668	0	0	242	0	2	42180	0	0	11500	0	0	26128	0	0	30952	0	1
1:97915746	G/A	DPYD	missense_variant	NM_000110.3:c.1774C>T	NP_000101.2:p.Arg592Trp	6 of 6 Predicted as Damaging	6.363	1	18.9863	33			Uncertain Significance	(1 Stars) Criteria Provided, Single Submitter	DM	"Dihydropyrimidine_dehydrogenase_deficiency"	fluorouracil,fluorouracil	metabolism/PK,metabolism/PK	Allele A is associated with decreased catalytic activity of DPYD when assayed with fluorouracil in 293FT cells as compared to allele G.,Allele A is associated with decreased activity of DPYD when assayed with fluorouracil as compared to allele G.	4,4	rs59086055	1	PASS	0.000143395	36	251054	0	1	113494	0	0	2668	0	0	242	0	0	42078	0	0	11492	0	0	26102	0	1	30912	0	1
1:97981322	C/T	DPYD	missense_variant	NM_000110.3:c.1700G>A	NP_000101.2:p.Gly567Glu	6 of 6 Predicted as Damaging	7.356	1	19.4624	29					DM	"Dihydropyrimidine_dehydrogenase_deficiency_partial"					rs1188134745	1	PASS	3.99116e-06	1	250554	0	1	113136	0	0	2668	0	0	238	0	0	41910	0	0	11452	0	1	26076	0	0	30792	0	0
1:97981340	C/A	DPYD	missense_variant	NM_000110.3:c.1682G>T	NP_000101.2:p.Arg561Leu	6 of 6 Predicted as Damaging	7.356	1	19.0953	32							fluorouracil	metabolism/PK	Allele A is not associated with activity of DPYD when assayed with fluorouracil as compared to allele C.		rs201615754	1	PASS	3.99058e-06	1	250590	0	0	113170	0	0	2668	0	0	240	0	0	41922	0	0	11456	0	0	26088	0	0	30796	0	0
1:97981341	G/A	DPYD	stop_gained	NM_000110.3:c.1681C>T	NP_000101.2:p.Arg561Ter	2 of 6 Predicted as Damaging	4.794	1	15.1674	42			Likely Pathogenic	(1 Stars) Criteria Provided, Single Submitter,(1 Stars) Criteria Provided, Single Submitter	DM	"Dihydropyrimidine_dehydrogenase_deficiency"					rs1057516968	1	PASS	7.98059e-06	2	250608	0	2	113168	0	0	2666	0	1	240	0	1	41918	0	0	11456	0	0	26084	0	0	30804	0	0
1:97981371	C/A	DPYD	missense_variant	NM_000110.3:c.1651G>T	NP_000101.2:p.Ala551Ser	6 of 6 Predicted as Damaging	7.356	1	18.7723	27.4							capecitabine	toxicity	Genotype CT is associated with Drug Toxicity when treated with capecitabine in people with Colorectal Neoplasms.		rs777425216	1	PASS	3.99096e-06	1	250566	0	0	113156	0	0	2668	0	0	242	0	0	41916	0	0	11456	0	0	26074	0	0	30800	0	0
1:97981371	C/T	DPYD	missense_variant	NM_000110.3:c.1651G>A	NP_000101.2:p.Ala551Thr	6 of 6 Predicted as Damaging	7.356	1	18.7723	29.1			Uncertain Significance	(2 Stars) Criteria Provided, Multiple Submitters, No Conflicts,(1 Stars) Criteria Provided, Single Submitter	DM	"Dihydropyrimidine_dehydrogenase_deficiency"	capecitabine	toxicity	Genotype CT is associated with Drug Toxicity when treated with capecitabine in people with Colorectal Neoplasms.		rs777425216	1	PASS	0.000119729	30	250566	0	8	113156	0	1	2668	0	0	242	0	2	41916	0	1	11456	0	4	26074	0	0	30800	0	0
1:97981407	C/G	DPYD	missense_variant	NM_000110.3:c.1615G>C	NP_000101.2:p.Gly539Arg	6 of 6 Predicted as Damaging	5.654	1	14.1515	23.1							fluorouracil	metabolism/PK	Allele T is not associated with activity of DPYD when assayed with fluorouracil as compared to allele C.		rs142619737	1	PASS	1.19741e-05	3	250540	0	1	113108	0	0	2668	0	0	240	0	0	41910	0	1	11464	0	0	26066	0	0	30760	0	0
1:97981407	C/T	DPYD	missense_variant	NM_000110.3:c.1615G>A	NP_000101.2:p.Gly539Arg	6 of 6 Predicted as Damaging	5.654	1	14.1515	23.2			Not Provided	(0 Stars) No Assertion Provided	DM?	"Schizophrenia"	fluorouracil	metabolism/PK	Allele T is not associated with activity of DPYD when assayed with fluorouracil as compared to allele C.		rs142619737	1	PASS	0.000187595	47	250540	0	1	113108	0	0	2668	0	0	240	0	0	41910	0	1	11464	0	0	26066	0	0	30760	0	43
1:98015165	G/A	DPYD	missense_variant	NM_000110.3:c.1475C>T	NP_000101.2:p.Ser492Leu	6 of 6 Predicted as Damaging	9.403	1	20.8598	29.6			Uncertain Significance	(2 Stars) Criteria Provided, Multiple Submitters, No Conflicts	DM	"Dihydropyrimidine_dehydrogenase_deficiency"	fluorouracil,	metabolism/PK,other	Allele A is associated with decreased activity of DPYD when assayed with fluorouracil as compared to allele G.,Genotype AA is associated with Purine-Pyrimidine Metabolism, Inborn Errors.	,	rs72549304	1	PASS	4.38156e-05	11	251052	0	0	113448	0	0	2668	0	0	242	0	0	42038	0	0	11472	0	0	26118	0	0	30910	0	5
1:98015282	G/C	DPYD	missense_variant	NM_000110.3:c.1358C>G	NP_000101.2:p.Pro453Arg	6 of 6 Predicted as Damaging	9.403	1	20.8598	30			Not Provided	(0 Stars) No Assertion Provided			fluorouracil	metabolism/PK	Allele C is not associated with activity of DPYD when assayed with fluorouracil as compared to allele G.		rs144395748	1	PASS	8.77942e-05	22	250586	0	0	113196	0	0	2668	0	0	240	0	0	41988	0	0	11452	0	0	26044	0	0	30804	0	22
1:98015291	G/A	DPYD	missense_variant	NM_000110.3:c.1349C>T	NP_000101.2:p.Ala450Val	6 of 6 Predicted as Damaging	9.403	1	20.8598	25.8							fluorouracil	metabolism/PK	Allele A is not associated with activity of DPYD when assayed with fluorouracil as compared to allele G.		rs72975710	1	PASS	0.000207784	52	250260	0	2	113042	0	1	2664	0	0	240	0	1	41948	0	0	11446	0	0	25976	0	0	30768	0	42
1:98039341	A/C	DPYD	missense_variant	NM_000110.3:c.1314T>G	NP_000101.2:p.Phe438Leu	6 of 6 Predicted as Damaging	1.02	1	8.6137	23.2					FP	"Reduced_enzyme_activity"	fluorouracil	metabolism/PK	Allele C is associated with decreased activity of DPYD when assayed with fluorouracil as compared to allele A.		rs186169810	1	PASS	7.16777e-05	18	251124	0	0	113440	0	0	2668	0	0	240	0	0	42048	0	0	11478	0	0	26130	0	0	30876	0	0
1:98039454	C/T	DPYD	missense_variant	NM_000110.3:c.1201G>A	NP_000101.2:p.Gly401Arg	6 of 6 Predicted as Damaging	5.716	1	14.9729	23.9					FP	"Reduced_enzyme_activity"					rs1373691961	1	PASS	7.96527e-06	2	251090	0	2	113486	0	0	2668	0	0	242	0	2	42084	0	0	11482	0	0	26114	0	0	30896	0	0
1:98039499	C/A	DPYD	stop_gained	NM_000110.3:c.1156G>T	NP_000101.2:p.Glu386Ter	2 of 6 Predicted as Damaging	7.432	1	17.5523	43					DM	"Dihydropyrimidine_dehydrogenase_deficiency"	fluorouracil,fluorouracil,fluorouracil,fluorouracil	efficacy,metabolism/PK,toxicity,efficacy	Genotype CC is not associated with response to fluorouracil in children with Precursor Cell Lymphoblastic Leukemia-Lymphoma as compared to genotypes AA + AC.,Allele A is associated with decreased activity of DPYD when assayed with fluorouracil as compared to allele C.,Genotype CC is not associated with Drug Toxicity when treated with fluorouracil in children with Precursor Cell Lymphoblastic Leuk…	,,,	rs78060119	1	PASS	7.97442e-06	2	250802	0	1	113278	0	0	2668	0	0	242	0	1	41992	0	0	11458	0	0	26088	0	0	30830	0	0
1:98058792	TA/-	DPYD	frameshift_variant	NM_000110.3:c.1109_1110delTA	NP_000101.2:p.Ile370Lysfs*5					35					DM	"Dihydropyrimidine_dehydrogenase_deficiency"					rs749571474	1	PASS	3.97829e-06	1	251364	0	1	113694	0	0	2670	0	0	242	0	0	42180	0	1	11502	0	0	26134	0	0	30966	0	0
1:98058899	C/T	DPYD	missense_variant	NM_000110.3:c.1003G>A	NP_000101.2:p.Val335Met	6 of 6 Predicted as Damaging	7.259	1	18.479	25.6					FP	"Reduced_enzyme_activity"	fluorouracil,,fluorouracil	metabolism/PK,other,metabolism/PK	Allele A is associated with decreased catalytic activity of DPYD when assayed with fluorouracil in 293FT cells as compared to allele C.,Allele A is associated with increased expression of DPYD protein in 293FT cells as compared to allele C.,Allele A is not associated with activity of DPYD when assayed with fluorouracil as compared to allele C.	4,4,4	rs72549306	1	PASS	1.98853e-05	5	251442	0	0	113738	0	0	2670	0	0	240	0	0	42208	0	0	11498	0	0	26134	0	0	30988	0	1
1:98060644	A/G	DPYD	missense_variant	NM_000110.3:c.929T>C	NP_000101.2:p.Leu310Ser	6 of 6 Predicted as Damaging	7.753	1	13.5118	28.2							fluorouracil	metabolism/PK	Allele G is not associated with activity of DPYD when assayed with fluorouracil as compared to allele A.		rs150437414	1	PASS	7.95817e-06	2	251314	0	2	113628	0	0	2670	0	0	242	0	1	42152	0	1	11494	0	0	26128	0	0	30942	0	0
1:98060722	C/A	DPYD	missense_variant	NM_000110.3:c.851G>T	NP_000101.2:p.Gly284Val	6 of 6 Predicted as Damaging	6.469	1	16.7583	33	0.999956	0.998			DM	"Dihydropyrimidine_dehydrogenase_deficiency"					rs777220476	1	PASS	3.98565e-06	1	250900	0	0	113438	0	0	2668	0	0	242	0	0	42068	0	0	11480	0	0	26114	0	0	30866	0	0
1:98157304	T/G	DPYD	missense_variant	NM_000110.3:c.731A>C	NP_000101.2:p.Glu244Ala	6 of 6 Predicted as Damaging	7.621	1	15.0462	27.3					DM	"Dihydropyrimidine_dehydrogenase_deficiency"					rs1185250556	1	PASS	7.95653e-06	2	251366	0	2	113662	0	0	2670	0	0	240	0	1	42170	0	0	11498	0	0	26132	0	1	30952	0	0
1:98157325	G/A	DPYD	missense_variant	NM_000110.3:c.710C>T	NP_000101.2:p.Pro237Leu	6 of 6 Predicted as Damaging	9.375	1	18.7184	26.9					DM	"Dihydropyrimidine_dehydrogenase_deficiency"		other	Allele A is associated with decreased catalytic activity of DPYD as compared to allele G.		rs780025995	1	PASS	2.38738e-05	6	251322	0	0	113644	0	0	2670	0	0	240	0	0	42160	0	0	11500	0	0	26132	0	0	30942	0	0
1:98157331	C/T	DPYD	missense_variant	NM_000110.3:c.704G>A	NP_000101.2:p.Arg235Gln	6 of 6 Predicted as Damaging	7.412	1	18.7184	29.1			Uncertain Significance	(1 Stars) Criteria Provided, Single Submitter	DM	"Dihydropyrimidine_dehydrogenase_deficiency"					rs755416212	1	PASS	1.19374e-05	3	251312	0	3	113638	0	0	2670	0	0	240	0	0	42158	0	1	11498	0	0	26130	0	2	30942	0	0
1:98157332	G/A	DPYD	missense_variant	NM_000110.3:c.703C>T	NP_000101.2:p.Arg235Trp	6 of 6 Predicted as Damaging	4.365	1	14.1446	29.5			Drug Response	(1 Stars) Criteria Provided, Single Submitter,(3 Stars) Reviewed By Expert Panel	DM	"Dihydropyrimidine_dehydrogenase_deficiency"	,fluorouracil,capecitabine,fluorouracil	,metabolism/PK,toxicity	Allele G is associated with enzyme activity of DPYD.,Allele A is associated with decreased activity of DPYD when assayed with fluorouracil as compared to allele G.,Allele A is not associated with Drug Toxicity when treated with capecitabine or fluorouracil in people with Colorectal Neoplasms.	1A,1A,1A	rs1801266	1	PASS	7.95887e-05	20	251292	0	10	113630	0	0	2670	0	0	240	0	3	42152	0	0	11498	0	3	26130	0	4	30940	0	0
1:98164926	C/A	DPYD	stop_gained	NM_000110.3:c.661G>T	NP_000101.2:p.Glu221Ter	2 of 6 Predicted as Damaging	2.004	1	8.4118	39			Pathogenic/Likely Pathogenic	(2 Stars) Criteria Provided, Multiple Submitters, No Conflicts	DM	"Dihydropyrimidine_dehydrogenase_deficiency"					rs146170505	1	PASS	3.18794e-05	8	250946	0	8	113316	0	0	2668	0	0	240	0	6	41972	0	0	11468	0	0	26128	0	2	30840	0	0
1:98164986	T/G	DPYD	missense_variant	NM_000110.3:c.601A>C	NP_000101.2:p.Ser201Arg	6 of 6 Predicted as Damaging	7.664	1	15.5975	26.9					DM	"Dihydropyrimidine_dehydrogenase_deficiency"	fluorouracil,	metabolism/PK,other	Allele G is associated with decreased activity of DPYD when assayed with fluorouracil as compared to allele T.,Genotype GT is associated with Purine-Pyrimidine Metabolism, Inborn Errors.	,	rs72549308	1	PASS	2.78707e-05	7	251160	0	6	113514	0	0	2668	0	0	242	0	3	42090	0	1	11474	0	1	26134	0	1	30906	0	1
1:98165030	T/C	DPYD	missense_variant	NM_000110.3:c.557A>G	NP_000101.2:p.Tyr186Cys	6 of 6 Predicted as Damaging	3.782	1	10.818	25.9			Drug Response	(0 Stars) No Assertion Provided,(1 Stars) Criteria Provided, Single Submitter,(3 Stars) Reviewed By Expert Panel	DM	"Dihydropyrimidine_dehydrogenase_deficiency"	fluorouracil,,,fluorouracil,fluorouracil,fluorouracil	metabolism/PK,other,other,metabolism/PK,toxicity,toxicity	Allele C is associated with decreased activity of DPYD when assayed with fluorouracil as compared to allele T.,Allele C is associated with decreased activity of DPYD.,Genotype CT is associated with decreased activity of DPYD as compared to genotype TT.,Genotype CT is associated with decreased DPD activity when exposed to fluorouracil in healthy individuals as compared to genotype TT.,Genotype CT …	1A,1A,1A,1A,1A,1A	rs115232898	1	PASS	0.00166117	417	251028	5	6	113484	0	0	2668	0	0	242	0	0	42090	0	4	11472	0	1	26132	0	1	30880	0	374
1:98205946	A/G	DPYD	splice_donor_variant	NM_000110.3:c.321+2T>C		2 of 6 Predicted as Damaging	8.631	1	15.9456	34	0.994669	0.678			DM	"Dihydropyrimidine_dehydrogenase_deficiency"					rs1193078195	1	PASS	7.96495e-06	2	251100	0	0	113562	0	0	2668	0	0	242	0	0	42122	0	0	11492	0	0	26124	0	0	30914	0	0
1:98205947	C/T	DPYD	splice_donor_variant	NM_000110.3:c.321+1G>A		2 of 6 Predicted as Damaging	7.214	1	19.8102	34	0.999987	0.934			DM	"Dihydropyrimidine_dehydrogenase_deficiency"					rs746368304	1	PASS	1.19482e-05	3	251084	0	3	113554	0	0	2668	0	0	242	0	2	42120	0	0	11488	0	0	26130	0	1	30906	0	0
1:98205967	ATGA/-	DPYD	frameshift_variant	NM_000110.3:c.299_302delTCAT	NP_000101.2:p.Phe100Serfs*15					35					DM	"Dihydropyrimidine_dehydrogenase_deficiency"	fluorouracil	metabolism/PK	Allele del is associated with decreased activity of DPYD when assayed with fluorouracil as compared to allele ATGA.	1A	rs72549309	1	PASS	0.000103521	26	251156	0	24	113580	0	0	2668	0	0	242	0	9	42132	0	3	11492	0	7	26126	0	5	30920	0	0
1:98205995	G/C	DPYD	missense_variant	NM_000110.3:c.274C>G	NP_000101.2:p.Pro92Ala	6 of 6 Predicted as Damaging	9.069	1	19.5135	23.7					FP	"Reduced_enzyme_activity"	fluorouracil	metabolism/PK	Allele C is associated with decreased activity of DPYD when assayed with fluorouracil as compared to allele G.		rs143986398	1	PASS	3.98162e-05	10	251154	0	10	113590	0	0	2668	0	0	242	0	7	42132	0	0	11492	0	0	26128	0	3	30928	0	0
1:98293695	G/A	DPYD	stop_gained	NM_000110.3:c.208C>T	NP_000101.2:p.Arg70Ter	2 of 6 Predicted as Damaging	4.334	1	15.7881	37			Pathogenic/Likely Pathogenic	(2 Stars) Criteria Provided, Multiple Submitters, No Conflicts	DM	"Dihydropyrimidine_dehydrogenase_deficiency"					rs141597515	1	PASS	1.5941e-05	4	250926	0	2	113420	0	0	2668	0	0	242	0	1	42030	0	1	11486	0	0	26124	0	0	30870	0	1
1:98348909	G/A	DPYD	stop_gained	NM_000110.3:c.61C>T	NP_000101.2:p.Arg21Ter	2 of 6 Predicted as Damaging	3.948	1	17.0514	38			Likely Pathogenic	(1 Stars) Criteria Provided, Single Submitter	DM	"Dihydropyrimidine_dehydrogenase_deficiency"	fluorouracil	metabolism/PK	Allele A is associated with decreased activity of DPYD when assayed with fluorouracil as compared to allele G.		rs72549310	1	PASS	1.19574e-05	3	250890	0	1	113422	0	0	2668	0	0	242	0	1	42072	0	0	11486	0	0	26054	0	0	30900	0	1
1:169483568	C/A	F5	missense_variant	NM_000130.4:c.6658G>T	NP_000121.2:p.Gly2220Cys	6 of 6 Predicted as Damaging	6.309	1	17.7466	31					DM	"Factor_V_deficiency"					rs770569683	1	PASS	7.96572e-06	2	251076	0	2	113556	0	0	2668	0	0	240	0	1	42110	0	0	11488	0	0	26104	0	1	30946	0	0
1:169483573	A/G	F5	missense_variant	NM_000130.4:c.6653T>C	NP_000121.2:p.Leu2218Pro	6 of 6 Predicted as Damaging	7.513	1	14.2476	28.7					DM	"Factor_V_deficiency"					rs761265498	1	PASS	7.9647e-06	2	251108	0	0	113580	0	0	2668	0	0	240	0	0	42120	0	0	11486	0	0	26110	0	0	30956	0	0
1:169483622	G/A	F5	missense_variant	NM_000130.4:c.6604C>T	NP_000121.2:p.Arg2202Cys	6 of 6 Predicted as Damaging	3.953	1	13.0971	32					DM	"Factor_V_deficiency"					rs754980174	1	PASS	1.59403e-05	4	250936	0	1	113508	0	0	2668	0	0	240	0	0	42108	0	0	11492	0	0	26080	0	1	30920	0	0
1:169484791	C/T	F5	missense_variant	NM_000130.4:c.6419G>A	NP_000121.2:p.Gly2140Asp	6 of 6 Predicted as Damaging	6.455	1	19.223	27.8					DM	"Factor_V_deficiency"					rs1428657156	1	PASS	3.98432e-06	1	250984	0	1	113406	0	0	2668	0	0	242	0	0	42022	0	0	11474	0	0	26118	0	1	30882	0	0
1:169487691	G/A	F5	missense_variant	NM_000130.4:c.6304C>T	NP_000121.2:p.Arg2102Cys	6 of 6 Predicted as Damaging	6.608	1	13.7675	31			Likely Pathogenic	(1 Stars) Criteria Provided, Single Submitter	DM	"Factor_V_deficiency"					rs118203910	1	PASS	7.96476e-06	2	251106	0	0	113438	0	0	2668	0	0	242	0	0	42018	0	0	11500	0	0	26112	0	0	30898	0	0
1:169489812	G/A	F5	stop_gained	NM_000130.4:c.6139C>T	NP_000121.2:p.Arg2047Ter	1 of 6 Predicted as Damaging	-0.435		4.2599	36					DM	"Factor_V_deficiency"					rs1379054147	1	PASS	3.9853e-06	1	250922	0	0	113374	0	0	2666	0	0	238	0	0	42026	0	0	11478	0	0	26080	0	0	30886	0	0
1:169495162	G/A	F5	missense_variant	NM_000130.4:c.5693C>T	NP_000121.2:p.Thr1898Met	6 of 6 Predicted as Damaging	8.815	1	20.0784	31					DM	"Factor_V_deficiency"					rs367819569	1	PASS	1.59267e-05	4	251150	0	1	113472	0	0	2668	0	0	242	0	0	42058	0	0	11480	0	0	26128	0	1	30896	0	2
1:169497231	C/T	F5	missense_variant	NM_000130.4:c.5521G>A	NP_000121.2:p.Val1841Met	6 of 6 Predicted as Damaging	3.586	0.998	18.2122	27.1					DM	"Factor_V_deficiency"					rs142537705	1	PASS	7.96965e-06	2	250952	0	0	113390	0	0	2668	0	0	242	0	0	42032	0	0	11472	0	0	26108	0	0	30868	0	1
1:169498857	T/C	F5	missense_variant	NM_000130.4:c.5408A>G	NP_000121.2:p.His1803Arg	6 of 6 Predicted as Damaging	3.494	0.997	14.4611	24.5			Likely Pathogenic	(1 Stars) Criteria Provided, Single Submitter	DM	"Factor_V_deficiency"					rs754104059	1	PASS	2.78958e-05	7	250934	0	6	113396	0	0	2668	0	0	240	0	3	42046	0	0	11482	0	0	26088	0	3	30872	0	0
1:169500043	T/C	F5	missense_variant	NM_000130.4:c.5189A>G	NP_000121.2:p.Tyr1730Cys	6 of 6 Predicted as Damaging	7.609	1	15.604	33			Pathogenic	(1 Stars) Criteria Provided, Single Submitter	DM	"Factor_V_deficiency"					rs118203907	1	PASS	1.59521e-05	4	250750	0	4	113146	0	0	2668	0	0	242	0	2	41872	0	0	11458	0	0	26114	0	2	30792	0	0
1:169500056	G/A	F5	missense_variant	NM_000130.4:c.5176C>T	NP_000121.2:p.Arg1726Trp	6 of 6 Predicted as Damaging	2.229	0.99	13.1339	31					DM	"Factor_V_deficiency"					rs202197877	1	PASS	2.39276e-05	6	250756	0	4	113144	0	0	2668	0	0	242	0	1	41878	0	0	11460	0	2	26114	0	1	30782	0	0
1:169500195	-/T	F5	frameshift_variant	NM_000130.4:c.5037dupA	NP_000121.2:p.Ser1680Ilefs*8					35			Pathogenic	(1 Stars) Criteria Provided, Single Submitter	DM	"Factor_V_deficiency"					rs754982088	1	PASS	2.39282e-05	6	250750	0	0	113160	0	0	2666	0	0	240	0	0	41890	0	0	11460	0	0	26124	0	0	30780	0	0
1:169500223	A/C	F5	missense_variant	NM_000130.4:c.5009T>G	NP_000121.2:p.Leu1670Arg	6 of 6 Predicted as Damaging	8.893	1	15.604	29.6					DM	"Factor_V_deficiency"					rs780544421	1	PASS	3.99049e-06	1	250596	0	1	113140	0	0	2666	0	0	240	0	0	41890	0	0	11458	0	0	26108	0	1	30778	0	0
1:169505815	G/A	F5	stop_gained	NM_000130.4:c.4900C>T	NP_000121.2:p.Arg1634Ter	2 of 6 Predicted as Damaging	4.085	0.999	5.9628	38					DM	"Factor_V_deficiency"					rs760525448	1	PASS	1.19467e-05	3	251116	0	1	113516	0	0	2668	0	0	242	0	1	42102	0	0	11484	0	0	26110	0	0	30910	0	1
1:169509626	-/CAAT	F5	frameshift_variant	NM_000130.4:c.4699_4702dupATTG	NP_000121.2:p.Ala1568Aspfs*21					35					DM	"Factor_V_deficiency"					rs773569662	1	PASS	2.78791e-05	7	251084	0	7	113486	0	0	2668	0	0	242	0	0	42090	0	0	11464	0	7	26108	0	0	30914	0	0
1:169510429	T/-	F5	frameshift_variant	NM_000130.4:c.3899delA	NP_000121.2:p.His1300Leufs*2					23.7					DM	"Factor_V_deficiency"					rs1557914945	1	PASS	4.06105e-06	1	246242	0	0	112288	0	0	2668	0	0	236	0	0	41154	0	0	11472	0	0	26130	0	0	30628	0	0
1:169510847	G/A	F5	stop_gained	NM_000130.4:c.3481C>T	NP_000121.2:p.Arg1161Ter	1 of 6 Predicted as Damaging	0.65	0.406	6.2912	36			Pathogenic	(0 Stars) No Assertion Criteria Provided	DM	"Factor_V_deficiency"					rs118203909	1	PASS	3.97902e-06	1	251318	0	1	113620	0	0	2668	0	0	242	0	0	42140	0	0	11490	0	0	26132	0	1	30948	0	0
1:169511222	TC/-	F5	frameshift_variant	NM_000130.4:c.3105_3106delGA	NP_000121.2:p.Lys1036Alafs*18					25.3					DM	"Factor_V_deficiency"					rs1466621002	1	PASS	3.98699e-06	1	250816	0	1	113250	0	0	2668	0	0	242	0	1	41930	0	0	11466	0	0	26124	0	0	30820	0	0
1:169511240	G/A	F5	stop_gained	NM_000130.4:c.3088C>T	NP_000121.2:p.Arg1030Ter	2 of 6 Predicted as Damaging	4.22	1	15.6368	41					DM	"Factor_V_deficiency"					rs780253174	1	PASS	1.19581e-05	3	250876	0	0	113314	0	0	2668	0	0	242	0	0	41978	0	0	11472	0	0	26128	0	0	30826	0	0
1:169511466	A/-	F5	frameshift_variant	NM_000130.4:c.2862delT	NP_000121.2:p.Ser955Alafs*4					27.3			Likely Pathogenic	(1 Stars) Criteria Provided, Single Submitter	DM	"Factor_V_deficiency"					rs765982916	1	PASS	3.58412e-05	9	251108	0	2	113478	0	0	2668	0	0	242	0	1	42072	0	0	11476	0	1	26122	0	0	30898	0	0
1:169511559	G/-	F5	frameshift_variant	NM_000130.4:c.2769delC	NP_000121.2:p.Trp924Glyfs*11					23.1					DM	"Factor_V_deficiency"					rs754430059	1	PASS	3.98279e-06	1	251080	0	0	113438	0	0	2668	0	0	242	0	0	42042	0	0	11472	0	0	26130	0	0	30884	0	0
1:169511753	TT/-	F5	frameshift_variant	NM_000130.4:c.2574_2575delAA	NP_000121.2:p.Gln860Argfs*4					21.7					DM	"Factor_V_deficiency"					rs1557916305	1	PASS	3.98597e-06	1	250880	0	0	113282	0	0	2668	0	0	242	0	0	41950	0	0	11456	0	0	26128	0	0	30838	0	0
1:169519934	G/C	F5	missense_variant	NM_000130.4:c.1340C>G	NP_000121.2:p.Pro447Arg	6 of 6 Predicted as Damaging	6.096	1	10.8784	26.4					DM?	"Factor_V_deficiency"					rs368387623	1	PASS	1.19388e-05	3	251282	0	0	113604	0	0	2670	0	0	242	0	0	42132	0	0	11494	0	0	26128	0	0	30938	0	0
1:169519953	G/A	F5	missense_variant	NM_000130.4:c.1321C>T	NP_000121.2:p.Arg441Cys	6 of 6 Predicted as Damaging	4.792	1	15.8565	25.1			Conflicting Interpretations Of Pathogenicity	(1 Star) Criteria Provided, Conflicting Interpretations	DM	"Factor_V_deficiency"					rs747006175	1	PASS	5.17409e-05	13	251252	0	7	113586	0	0	2668	0	0	240	0	1	42126	0	2	11494	0	3	26128	0	1	30930	0	0
1:169521833	C/A	F5	missense_variant	NM_000130.4:c.1258G>T	NP_000121.2:p.Gly420Cys	6 of 6 Predicted as Damaging	7.259	1	20.3697	32					DM	"Factor_V_deficiency"					rs1172481159	1	PASS	3.97801e-06	1	251382	0	0	113688	0	0	2670	0	0	240	0	0	42182	0	0	11500	0	0	26132	0	0	30964	0	0
1:169524479	G/C	F5	missense_variant	NM_000130.4:c.1059C>G	NP_000121.2:p.Phe353Leu	6 of 6 Predicted as Damaging	1.87	1	10.0564	25.2					DM	"Factor_V_deficiency"					rs200531616	1	PASS	1.19311e-05	3	251444	0	1	113732	0	0	2670	0	1	242	0	0	42204	0	0	11500	0	0	26132	0	0	30984	0	0
1:169525925	C/T	F5	missense_variant	NM_000130.4:c.911G>A	NP_000121.2:p.Gly304Glu	6 of 6 Predicted as Damaging	7.456	1	20.6439	28			Conflicting Interpretations Of Pathogenicity	(1 Stars) Criteria Provided, Single Submitter,(1 Stars) Criteria Provided, Single Submitter	DM	"Factor_V_deficiency"					rs865947251	1	PASS	1.59101e-05	4	251412	0	3	113726	0	0	2670	0	0	242	0	3	42194	0	0	11504	0	0	26132	0	0	30984	0	0
1:169526051	G/C	F5	missense_variant	NM_000130.4:c.785C>G	NP_000121.2:p.Ser262Trp	6 of 6 Predicted as Damaging	9.434	1	20.6439	33					DM?	"Factor_V_deficiency"					rs201865717	1	PASS	7.964e-06	2	251130	0	2	113474	0	0	2668	0	0	242	0	2	42050	0	0	11486	0	0	26122	0	0	30906	0	0
1:169528474	G/A	F5	missense_variant	NM_000130.4:c.647C>T	NP_000121.2:p.Ala216Val	6 of 6 Predicted as Damaging	4.025	1	16.8286	26.6					DM?	"Factor_V_deficiency"					rs768038673	1	PASS	3.9814e-06	1	251168	0	1	113534	0	0	2670	0	0	242	0	0	42096	0	0	11488	0	1	26116	0	0	30922	0	0
1:169529800	C/G	F5	missense_variant	NM_000130.4:c.578G>C	NP_000121.2:p.Cys193Ser	6 of 6 Predicted as Damaging	7.598	1	19.1602	25.1					DM	"Factor_V_deficiency"					rs773849243	1	PASS	3.97937e-06	1	251296	0	1	113666	0	0	2668	0	0	242	0	0	42170	0	0	11494	0	0	26126	0	1	30966	0	0
1:169529812	G/A	F5	missense_variant	NM_000130.4:c.566C>T	NP_000121.2:p.Pro189Leu	6 of 6 Predicted as Damaging	6.465	1	19.1602	24.9					DM	"Factor_V_deficiency"					rs141800405	1	PASS	7.1607e-05	18	251372	0	1	113704	0	0	2668	0	0	242	0	0	42190	0	1	11498	0	0	26132	0	0	30974	0	17
1:169529854	T/C	F5	missense_variant	NM_000130.4:c.524A>G	NP_000121.2:p.His175Arg	6 of 6 Predicted as Damaging	6.043	1	11.4854	23.6			Uncertain Significance	(1 Stars) Criteria Provided, Single Submitter,(1 Stars) Criteria Provided, Single Submitter,(1 Stars) Criteria Provided, Single Submitter,(1 Stars) Criteria Provided, Single Submitter,(1 Stars) Criteria Provided, Single Submitter	DM	"Factor_V_deficiency"					rs201510575	1	PASS	0.000354057	89	251372	1	1	113712	0	0	2668	0	0	242	0	0	42190	0	1	11498	0	0	26134	0	0	30980	0	2
1:169541477	A/T	F5	missense_variant	NM_000130.4:c.355T>A	NP_000121.2:p.Tyr119Asn	6 of 6 Predicted as Damaging	5.745	1	13.7387	27.6					DM	"Factor_V_deficiency"					rs1318995804	1	PASS	3.99667e-06	1	250208	0	1	113188	0	0	2666	0	0	240	0	0	42082	0	0	11438	0	0	25966	0	1	30796	0	0
1:169541546	C/G	F5	missense_variant	NM_000130.4:c.286G>C	NP_000121.2:p.Asp96His	6 of 6 Predicted as Damaging	4.812	1	16.5806	26					DM	"Factor_V_deficiency"					rs747215273	1	PASS	7.5734e-05	19	250878	0	0	113496	0	0	2668	0	0	242	0	0	42096	0	0	11490	0	0	26098	0	0	30902	0	0
1:169541549	C/T	F5	missense_variant	NM_000130.4:c.283G>A	NP_000121.2:p.Gly95Arg	6 of 6 Predicted as Damaging	4.812	1	16.9823	27.1					DM	"Factor_V_deficiency"					rs376110672	1	PASS	3.18906e-05	8	250858	0	2	113486	0	0	2668	0	0	242	0	1	42082	0	1	11490	0	0	26096	0	0	30908	0	0
12:21294563	A/T	SLCO1B1	stop_gained	NM_006446.4:c.55A>T	NP_006437.3:p.Lys19Ter	1 of 6 Predicted as Damaging	0.125		3.7085	29.6					DM	"OATP1B1_deficiency"					rs376829525	1	PASS	2.39622e-05	6	250394	0	0	113116	0	0	2662	0	0	240	0	0	41892	0	0	11460	0	0	26104	0	0	30758	0	6
12:21375233	G/T	SLCO1B1	splice_acceptor_variant	NM_006446.4:c.1683-1G>T		2 of 6 Predicted as Damaging	5.871	1	12.5074	25.5	0.999988	0.922			FP	"OATP1B1_deficiency"					rs757392414	1	PASS	9.5563e-05	20	209286	0	0	98070	0	0	2666	0	0	200	0	0	29670	0	0	11468	0	0	26102	0	0	27964	0	0
12:21375289	C/T	SLCO1B1	stop_gained	NM_006446.4:c.1738C>T	NP_006437.3:p.Arg580Ter	2 of 6 Predicted as Damaging	1.039	0.621	12.8754	42			Conflicting Interpretations Of Pathogenicity	(1 Stars) Criteria Provided, Single Submitter,(1 Stars) Criteria Provided, Single Submitter	FP	"OATP1B1_deficiency"					rs71581941	1	PASS	0.0016364	297	181496	2	120	88902	0	8	2604	0	0	170	0	22	23766	0	55	11158	0	4	25702	0	31	25502	0	9
6:18130989	A/T	TPMT	stop_gained	NM_000367.4:c.648T>A	NP_000358.1:p.Cys216Ter	2 of 6 Predicted as Damaging	3.014	0.994	7.4326	35			Not Provided	(0 Stars) No Assertion Provided	DM	"TPMT_deficiency"					rs398122996	1	PASS	3.58069e-05	9	251348	0	4	113676	0	0	2670	0	0	240	0	2	42184	0	0	11492	0	0	26130	0	2	30960	0	0
6:18131012	C/T	TPMT	splice_acceptor_variant	NM_000367.4:c.626-1G>A		2 of 6 Predicted as Damaging	4.597	1	15.9448	26.1	0.999977	0.948	Drug Response	(0 Stars) No Assertion Criteria Provided	DP	"TPMT_deficiency_association_with"					rs1800584	1	PASS	2.78594e-05	7	251262	0	7	113642	0	0	2670	0	0	240	0	4	42170	0	1	11486	0	0	26124	0	2	30952	0	0
6:18134118	T/C	TPMT	missense_variant	NM_000367.4:c.497A>G	NP_000358.1:p.Tyr166Cys	6 of 6 Predicted as Damaging	4.589	1	13.0508	24.6			Drug Response	(0 Stars) No Assertion Criteria Provided							rs201695576	1	PASS	3.9781e-06	1	251376	0	1	113698	0	0	2666	0	0	240	0	1	42202	0	0	11500	0	0	26120	0	0	30970	0	0
6:18134121	C/T	TPMT	splice_acceptor_variant	NM_000367.4:c.495-1G>A		2 of 6 Predicted as Damaging	4.47	1	12.0363	25.1	0.999976	0.76			DP	"TPMT_deficiency_association_with"					rs9333570	1	PASS	2.78498e-05	7	251348	0	5	113678	0	0	2668	0	0	240	0	0	42194	0	0	11494	0	1	26120	0	4	30962	0	2
6:18143901	C/A	TPMT	stop_gained	NM_000367.4:c.292G>T	NP_000358.1:p.Glu98Ter	2 of 6 Predicted as Damaging	3.68	1	18.2496	41			Uncertain Significance	(1 Stars) Criteria Provided, Single Submitter	DP	"TPMT_deficiency_association_with"					rs72552739	1	PASS	0.000115393	29	251314	0	28	113658	0	0	2668	0	0	242	0	17	42172	0	1	11494	0	4	26126	0	6	30956	0	1
6:18148076	C/T	TPMT	missense_variant	NM_000367.4:c.211G>A	NP_000358.1:p.Gly71Arg	6 of 6 Predicted as Damaging	5.26	1	18.1183	26.7					FP	"Reduced_expression"					rs777686348	1	PASS	1.19376e-05	3	251306	0	3	113674	0	0	2668	0	0	240	0	2	42170	0	1	11494	0	0	26132	0	0	30970	0	0
6:18149264	-/T	TPMT	frameshift_variant	NM_000367.4:c.95dupA	NP_000358.1:p.Trp33Valfs*26					32			Drug Response	(0 Stars) No Assertion Criteria Provided							rs759836180	1	PASS	0.000107378	27	251448	0	1	113736	0	0	2668	0	0	242	0	0	42202	0	0	11502	0	1	26134	0	0	30988	0	0
16:31104687	T/A	VKORC1	missense_variant	NM_001311311.1:c.229A>T	NP_001298240.1:p.Asn77Tyr	6 of 6 Predicted as Damaging	6.451,6.451	1,1	15.8048,15.8048	29.8					DM	"Oral_anticoagulant_resistance"					rs755767348	1	PASS	7.96014e-06	2	251252	0	0	113542	0	0	2668	0	0	242	0	0	42068	0	0	11486	0	0	26132	0	0	30946	0	0
16:31104720	C/T	VKORC1	missense_variant	NM_001311311.1:c.196G>A	NP_001298240.1:p.Val66Met	6 of 6 Predicted as Damaging	1.452,1.452	1,1	19.6509,19.6509	29.7			Pathogenic	(1 Stars) Criteria Provided, Single Submitter	DM	"Warfarin_resistance"	warfarin,warfarin,warfarin,warfarin	dosage,dosage,dosage,efficacy	Allele T is associated with increased dose of warfarin as compared to allele C.,Allele T is associated with increased dose of warfarin as compared to allele C.,Allele T is associated with increased dose of warfarin as compared to allele C.,Allele T is associated with decreased response to warfarin as compared to allele C.	,,,	rs72547529	1	PASS	0.000195127	49	251118	0	0	113416	0	0	2670	0	0	242	0	0	41984	0	0	11462	0	0	26134	0	0	30924	0	43
16:31105966	C/A	VKORC1	missense_variant	NM_001311311.1:c.85G>T	NP_001298240.1:p.Val29Leu	6 of 6 Predicted as Damaging	5.929	1	14.8781	27.5			Pathogenic	(0 Stars) No Assertion Criteria Provided	DM	"Warfarin_resistance"	warfarin,warfarin	dosage,dosage	Allele A is associated with increased dose of warfarin as compared to allele C.,Allele A is associated with increased dose of warfarin as compared to allele C.	4,4	rs104894539	1	PASS	4.33193e-06	1	230844	0	0	102648	0	0	2064	0	0	188	0	0	39084	0	0	10422	0	0	23824	0	0	27066	0	1
16:31105972	G/C	VKORC1	missense_variant	NM_001311311.1:c.79C>G	NP_001298240.1:p.Leu27Val	6 of 6 Predicted as Damaging	2.046	0.981	5.1669	23.6					DM	"Fluindione_resistance"					rs549914326	1	PASS	0.000311613	72	231056	2	7	102718	0	0	2030	0	0	190	0	7	39056	0	0	10450	0	0	23852	0	0	27140	0	0
LOF/Missense variants not listed in ClinVar/HGMD/PharmGKB in the context of drug response
19:41497215	A/-	CYP2B6	frameshift_variant	NM_000767.4:c.6delA	NP_000758.1:p.Glu2Aspfs*55					21.9											rs762817768	1	PASS	1.59129e-05	4	251368	0	0	113670	0	0	2670	0	0	242	0	0	42168	0	0	11492	0	0	26132	0	0	30966	0	0
19:41497282	-/T	CYP2B6	stop_gained	NM_000767.4:c.72dupT	NP_000758.1:p.Asn25Terfs					17.08											rs751315964	1	PASS	1.98847e-05	5	251450	0	5	113734	0	0	2668	0	0	242	0	1	42200	0	0	11498	0	0	26134	0	4	30992	0	0
19:41497293	-/GC	CYP2B6	frameshift_variant	NM_000767.4:c.82_83insGC	NP_000758.1:p.Asp28Glyfs*30					18.82											rs781463375	1	PASS	0.000775792	195	251356	5	5	113700	0	0	2666	0	0	242	0	2	42182	0	0	11492	0	0	26130	0	3	30988	0	178
19:41497295	CG/-	CYP2B6	frameshift_variant	NM_000767.4:c.86_87delGC	NP_000758.1:p.Arg29Profs*19					16.32											rs750679089	1	PASS	0.000779752	196	251362	5	5	113708	0	0	2668	0	0	242	0	2	42188	0	0	11494	0	0	26134	0	3	30982	0	179
19:41497310	C/-	CYP2B6	frameshift_variant	NM_000767.4:c.103delC	NP_000758.1:p.Arg35Alafs*22					19.67											rs756365431	1	PASS	3.97807e-06	1	251378	0	0	113678	0	0	2668	0	0	242	0	0	42166	0	0	11492	0	0	26132	0	0	30978	0	0
19:41497356	G/-	CYP2B6	frameshift_variant	NM_000767.4:c.146delG	NP_000758.1:p.Arg49Lysfs*8					13.43											rs779942397	1	PASS	1.19326e-05	3	251412	0	0	113708	0	0	2668	0	0	242	0	0	42184	0	0	11498	0	0	26134	0	0	30982	0	0
19:41509905	G/A	CYP2B6	splice_acceptor_variant	NM_000767.4:c.172-1G>A		2 of 6 Predicted as Damaging	8.307	1	11.9571	25.2	0.999878	0.892									rs1389789429	1	PASS	3.98905e-06	1	250686	0	1	113284	0	0	2658	0	0	240	0	0	42014	0	1	11474	0	0	26076	0	0	30822	0	0
19:41509908	C/-	CYP2B6	frameshift_variant	NM_000767.4:c.175delC	NP_000758.1:p.Arg59Glufs*23					14.98											rs755505792	1	PASS	3.98893e-06	1	250694	0	1	113292	0	0	2662	0	0	240	0	0	42020	0	0	11472	0	1	26088	0	0	30810	0	0
19:41509909	C/T	CYP2B6	stop_gained	NM_000767.4:c.175C>T	NP_000758.1:p.Arg59Ter	1 of 6 Predicted as Damaging	-0.005		7.0434	35											rs371545330	1	PASS	1.99435e-05	5	250708	0	4	113292	0	0	2664	0	0	240	0	1	42022	0	2	11470	0	0	26082	0	1	30814	0	0
19:41509944	G/-	CYP2B6	frameshift_variant	NM_000767.4:c.212delG	NP_000758.1:p.Gly71Aspfs*11					23.9											rs779607792	1	PASS	1.19412e-05	3	251230	0	0	113564	0	0	2670	0	0	242	0	0	42108	0	0	11480	0	0	26130	0	0	30934	0	0
19:41510015	CCTTCTC/-	CYP2B6	frameshift_variant	NM_000767.4:c.281_287delCCTTCTC	NP_000758.1:p.Ala94Valfs*18					25.1											rs748496733	1	PASS	3.97807e-06	1	251378	0	0	113688	0	0	2670	0	0	242	0	0	42182	0	0	11498	0	0	26132	0	0	30964	0	0
19:41510027	G/-	CYP2B6	frameshift_variant	NM_000767.4:c.296delG	NP_000758.1:p.Gly99Glufs*15					24.5											rs1568559886	1	PASS	3.97978e-06	1	251270	0	0	113604	0	0	2670	0	0	242	0	0	42128	0	0	11492	0	0	26130	0	0	30942	0	0
19:41510069	G/C	CYP2B6	splice_donor_variant	NM_000767.4:c.334+1G>C		2 of 6 Predicted as Damaging	7.987	1	13.7687	24.1	0.999965	0.938									rs778023673	1	PASS	3.99265e-06	1	250460	0	1	113176	0	0	2662	0	0	242	0	0	42008	0	0	11456	0	0	25994	0	1	30814	0	0
19:41510070	T/C	CYP2B6	splice_donor_variant	NM_000767.4:c.334+2T>C		2 of 6 Predicted as Damaging	4.864	1	11.0112	24.3	0.999959	0.952									rs373926269	1	PASS	3.19591e-05	8	250320	0	0	113088	0	0	2658	0	0	242	0	0	41976	0	0	11456	0	0	25982	0	0	30774	0	8
19:41510243	C/T	CYP2B6	stop_gained	NM_000767.4:c.376C>T	NP_000758.1:p.Arg126Ter	1 of 6 Predicted as Damaging	-1.538		3.9475	35											rs370958436	1	PASS	1.19392e-05	3	251274	0	1	113660	0	0	2670	0	0	242	0	0	42180	0	0	11486	0	0	26118	0	1	30964	0	0
19:41510297	G/T	CYP2B6	stop_gained	NM_000767.4:c.430G>T	NP_000758.1:p.Glu144Ter	2 of 6 Predicted as Damaging	1.786	1	9.1616	40											rs117323987	1	PASS	5.57006e-05	14	251344	0	11	113708	0	0	2670	0	0	242	0	4	42204	0	0	11494	0	5	26122	0	2	30976	0	0
19:41512884	C/T	CYP2B6	stop_gained	NM_000767.4:c.559C>T	NP_000758.1:p.Arg187Ter	2 of 6 Predicted as Damaging	2.14	0.936	10.2664	38											rs201793417	1	PASS	1.98851e-05	5	251444	0	0	113734	0	0	2670	0	0	242	0	0	42200	0	0	11500	0	0	26134	0	0	30988	0	3
19:41512926	T/-	CYP2B6	frameshift_variant	NM_000767.4:c.602delT	NP_000758.1:p.Leu201Cysfs*24					10.35											rs1256805248	1	PASS	3.97703e-06	1	251444	0	1	113728	0	0	2670	0	0	242	0	0	42196	0	0	11502	0	0	26134	0	1	30984	0	0
19:41512939	-/C	CYP2B6	frameshift_variant	NM_000767.4:c.614dupC	NP_000758.1:p.Ser207Phefs*12					15.66											rs767152539	1	PASS	3.97738e-06	1	251422	0	0	113704	0	0	2670	0	0	242	0	0	42176	0	0	11500	0	0	26134	0	0	30982	0	0
19:41512945	-/C	CYP2B6	frameshift_variant	NM_000767.4:c.620dupC	NP_000758.1:p.Leu208Thrfs*11					22											rs1319178320	1	PASS	3.97731e-06	1	251426	0	1	113710	0	0	2670	0	0	242	0	1	42186	0	0	11496	0	0	26134	0	0	30982	0	0
19:41515301	G/T	CYP2B6	splice_donor_variant	NM_000767.4:c.822+1G>T		2 of 6 Predicted as Damaging	5.955	1	10.0109	22.1	0.999562										rs1420783650	1	PASS	4.0437e-06	1	247298	0	1	111312	0	0	2632	0	0	242	0	1	41116	0	0	11286	0	0	25862	0	0	30174	0	0
19:41515981	C/A	CYP2B6	missense_variant	NM_000767.4:c.905C>A	NP_000758.1:p.Thr302Asn	6 of 6 Predicted as Damaging	4.094	0.998	10.7582	24.5											rs1261998210	1	PASS	1.59094e-05	4	251424	0	0	113710	0	0	2668	0	0	242	0	0	42202	0	0	11498	0	0	26132	0	0	30968	0	0
19:41516022	A/T	CYP2B6	stop_gained	NM_000767.4:c.946A>T	NP_000758.1:p.Lys316Ter	2 of 6 Predicted as Damaging	4.94	0.844	12.0032	53											rs1296272368	1	PASS	3.97921e-06	1	251306	0	1	113630	0	0	2668	0	0	240	0	1	42146	0	0	11492	0	0	26132	0	0	30952	0	0
19:41516027	C/A	CYP2B6	stop_gained	NM_000767.4:c.951C>A	NP_000758.1:p.Tyr317Ter	2 of 6 Predicted as Damaging	0.113	0.971	7.8338	42											rs745458475	1	PASS	3.97928e-06	1	251302	0	0	113618	0	0	2668	0	0	240	0	0	42142	0	0	11488	0	0	26132	0	0	30948	0	0
19:41518211	TA/-	CYP2B6	frameshift_variant	NM_000767.4:c.973_974delTA	NP_000758.1:p.Tyr325Glnfs*4					29.5											rs769291349	1	PASS	3.98032e-06	1	251236	0	1	113574	0	0	2668	0	0	240	0	0	42122	0	0	11492	0	1	26126	0	0	30926	0	0
19:41518265	C/T	CYP2B6	stop_gained	NM_000767.4:c.1027C>T	NP_000758.1:p.Arg343Ter	1 of 6 Predicted as Damaging	-0.434	0.071	11.3729	39											rs201134384	1	PASS	0.000342226	86	251296	0	9	113622	0	0	2668	0	0	242	0	4	42140	0	0	11494	0	1	26126	0	4	30952	0	0
19:41518280	-/TAAT	CYP2B6	stop_gained	NM_000767.4:c.1043_1044insATTA	NP_000758.1:p.Tyr348Terfs					34											rs1201845423	1	PASS	3.97804e-06	1	251380	0	0	113682	0	0	2668	0	0	242	0	0	42174	0	0	11496	0	0	26132	0	0	30970	0	0
19:41518300	-/TGAG	CYP2B6	stop_gained	NM_000767.4:c.1062_1065dupTGAG	NP_000758.1:p.Ile356Terfs					25.1											rs1568563210	1	PASS	7.95659e-06	2	251364	0	0	113652	0	0	2668	0	0	242	0	0	42152	0	0	11494	0	0	26128	0	0	30968	0	0
19:41518301	G/A	CYP2B6	missense_variant	NM_000767.4:c.1063G>A	NP_000758.1:p.Glu355Lys	6 of 6 Predicted as Damaging	8.981	1	14.32	25.2											rs769787099	1	PASS	3.97848e-06	1	251352	0	0	113642	0	0	2668	0	0	242	0	0	42150	0	0	11498	0	0	26124	0	0	30960	0	0
19:41518373	G/-	CYP2B6	frameshift_variant	NM_000767.4:c.1137delG	NP_000758.1:p.Tyr380Thrfs*13					27.1											rs1329894263	1	PASS	3.98067e-06	1	251214	0	0	113514	0	0	2668	0	0	242	0	0	42068	0	0	11488	0	0	26132	0	0	30916	0	0
19:41518637	AACCAGACGCCTTC/-	CYP2B6	frameshift_variant	NM_000767.4:c.1213_1226delCCAGACGCCTTCAA	NP_000758.1:p.Pro405Serfs*2					34											rs1363429909	1	PASS	3.97678e-06	1	251460	0	0	113758	0	0	2668	0	0	242	0	0	42218	0	0	11504	0	0	26130	0	0	30996	0	0
19:41518640	C/A	CYP2B6	missense_variant	NM_000767.4:c.1214C>A	NP_000758.1:p.Pro405Gln	6 of 6 Predicted as Damaging	6.974	1	12.5621	23.8											rs1454422519	1	PASS	3.97678e-06	1	251460	0	1	113756	0	0	2668	0	0	242	0	1	42216	0	0	11504	0	0	26132	0	0	30994	0	0
19:41518646	C/-	CYP2B6	frameshift_variant	NM_000767.4:c.1221delC	NP_000758.1:p.Phe408Serfs*13					22.2											rs1390766543	1	PASS	3.97674e-06	1	251462	0	0	113764	0	0	2668	0	0	242	0	0	42220	0	0	11504	0	0	26134	0	0	30996	0	0
19:41518678	-/G	CYP2B6	frameshift_variant	NM_000767.4:c.1255dupG	NP_000758.1:p.Ala419Glyfs*6					26.1											rs748783536	1	PASS	3.97712e-06	1	251438	0	0	113754	0	0	2668	0	0	242	0	0	42218	0	0	11500	0	0	26134	0	0	30992	0	0
19:41522697	C/-	CYP2B6	frameshift_variant	NM_000767.4:c.1445delC	NP_000758.1:p.Pro482Glnfs					24.5											rs761596792	1	PASS	3.98292e-06	1	251072	0	0	113520	0	0	2658	0	0	242	0	0	42108	0	0	11490	0	0	26106	0	0	30916	0	1
19:41522724	C/-	CYP2B6	frameshift_variant	NM_000767.4:c.1471delC	NP_000758.1:p.Arg491Alafs					22.4											rs772840375	1	PASS	0.000115718	29	250610	0	0	113242	0	0	2664	0	0	240	0	0	42028	0	0	11470	0	0	26044	0	0	30796	0	0
10:96522592	C/T	CYP2C19	stop_gained	NM_000769.2:c.130C>T	NP_000760.1:p.Gln44Ter	1 of 6 Predicted as Damaging	0.32	0.007	9.4279	35											rs747911797	1	PASS	3.97947e-06	1	251290	0	0	113642	0	0	2668	0	0	242	0	0	42166	0	0	11494	0	0	26118	0	0	30954	0	1
10:96522593	AGAT/-	CYP2C19	frameshift_variant	NM_000769.2:c.136_139delGATA	NP_000760.1:p.Asp46Leufs*8					22.3											rs760774552	1	PASS	7.95893e-06	2	251290	0	0	113642	0	0	2668	0	0	242	0	0	42166	0	0	11494	0	0	26118	0	0	30954	0	0
10:96534814	G/T	CYP2C19	splice_acceptor_variant	NM_000769.2:c.169-1G>T		2 of 6 Predicted as Damaging	6.487	1	9.251	23	0.99995	0.892									rs1564660965	1	PASS	3.98251e-06	1	251098	0	1	113506	0	0	2668	0	0	242	0	1	42084	0	0	11470	0	0	26128	0	0	30914	0	0
10:96534940	CC/-	CYP2C19	frameshift_variant	NM_000769.2:c.294_295delCC	NP_000760.1:p.His99Phefs*5					12.71											rs759558872	1	PASS	3.97636e-06	1	251486	0	0	113770	0	0	2670	0	0	242	0	0	42222	0	0	11504	0	0	26134	0	0	30998	0	0
10:96534943	-/AG	CYP2C19	frameshift_variant	NM_000769.2:c.296_297insAG	NP_000760.1:p.His99Glnfs*32					15.6											rs765198346	1	PASS	3.97633e-06	1	251488	0	0	113770	0	0	2670	0	0	242	0	0	42222	0	0	11504	0	0	26134	0	0	30998	0	0
10:96535278	G/T	CYP2C19	stop_gained	NM_000769.2:c.463G>T	NP_000760.1:p.Glu155Ter	1 of 6 Predicted as Damaging	0.547	0.072	10.1418	39											rs374036992	1	PASS	1.59158e-05	4	251322	0	4	113610	0	0	2670	0	0	242	0	2	42108	0	0	11502	0	0	26134	0	2	30954	0	0
10:96535282	T/A	CYP2C19	stop_gained	NM_000769.2:c.467T>A	NP_000760.1:p.Leu156Ter	2 of 6 Predicted as Damaging	3.73	0.555	11.0095	38											rs1157042274	1	PASS	3.97915e-06	1	251310	0	0	113596	0	0	2670	0	0	242	0	0	42098	0	0	11502	0	0	26134	0	0	30950	0	1
10:96535286	A/-	CYP2C19	frameshift_variant	NM_000769.2:c.475delA	NP_000760.1:p.Thr159Profs*19					17.39											rs752571206	1	PASS	7.95887e-06	2	251292	0	0	113578	0	0	2670	0	0	242	0	0	42086	0	0	11502	0	0	26134	0	0	30944	0	0
10:96535297	G/T	CYP2C19	splice_donor_variant	NM_000769.2:c.481+1G>T		2 of 6 Predicted as Damaging	7.725	1	9.2773	23.7	0.999987	0.778									rs77576043	1	PASS	3.97994e-06	1	251260	0	0	113550	0	0	2670	0	0	242	0	0	42062	0	0	11502	0	0	26134	0	0	30940	0	0
10:96540255	G/C	CYP2C19	splice_acceptor_variant	NM_000769.2:c.482-1G>C		2 of 6 Predicted as Damaging	7.375	1	13.9288	23.9	0.999973	0.932									rs1194178489	1	PASS	3.97947e-06	1	251290	0	1	113672	0	0	2666	0	0	242	0	0	42180	0	0	11494	0	0	26130	0	1	30960	0	0
10:96540255	G/T	CYP2C19	splice_acceptor_variant	NM_000769.2:c.482-1G>T		2 of 6 Predicted as Damaging	7.375	1	13.9288	23.9	0.999973	0.928									rs1194178489	1	PASS	3.97947e-06	1	251290	0	1	113672	0	0	2666	0	0	242	0	1	42180	0	0	11494	0	0	26130	0	0	30960	0	0
10:96540324	C/T	CYP2C19	stop_gained	NM_000769.2:c.550C>T	NP_000760.1:p.Gln184Ter	2 of 6 Predicted as Damaging	2.284	1	2.0381	35											rs961342096	1	PASS	3.97769e-06	1	251402	0	0	113716	0	0	2668	0	0	242	0	0	42202	0	0	11498	0	0	26132	0	0	30974	0	1
10:96540403	C/-	CYP2C19	frameshift_variant	NM_000769.2:c.633delC	NP_000760.1:p.Trp212Glyfs*37					20.5											rs749601543	1	PASS	1.59224e-05	4	251218	0	4	113668	0	0	2668	0	0	242	0	0	42174	0	0	11496	0	3	26126	0	1	30962	0	0
10:96540409	G/A	CYP2C19	stop_gained	NM_000769.2:c.635G>A	NP_000760.1:p.Trp212Ter	1 of 6 Predicted as Damaging	0.021	0.017	2.428	35											rs751429804	1	PASS	3.98143e-06	1	251166	0	0	113646	0	0	2668	0	0	242	0	0	42152	0	0	11496	0	0	26126	0	0	30962	0	0
10:96541689	C/T	CYP2C19	stop_gained	NM_000769.2:c.754C>T	NP_000760.1:p.Gln252Ter	1 of 6 Predicted as Damaging	-0.554		11.748	35											rs748628122	1	PASS	5.8254e-06	1	171662	0	1	87352	0	0	2616	0	0	170	0	1	23350	0	0	11220	0	0	25098	0	0	24898	0	0
10:96541749	G/T	CYP2C19	stop_gained	NM_000769.2:c.814G>T	NP_000760.1:p.Glu272Ter	1 of 6 Predicted as Damaging	-0.335	0.006	4.3444	35											rs749564114	1	PASS	5.24301e-06	1	190730	0	0	93044	0	0	2646	0	0	190	0	0	26498	0	0	11356	0	0	25716	0	0	26638	0	0
10:96541756	T/C	CYP2C19	splice_donor_variant	NM_000769.2:c.819+2T>C		2 of 6 Predicted as Damaging	6.074	1	10.99	25.5	0.988294	0.544									rs72558186	1	PASS	5.25928e-06	1	190140	0	0	92904	0	0	2638	0	0	188	0	0	26548	0	0	11344	0	0	25654	0	0	26532	0	0
10:96580252	G/A	CYP2C19	splice_acceptor_variant	NM_000769.2:c.820-1G>A		2 of 6 Predicted as Damaging	5.18	1	11.4092	24.8	0.999982	0.936									rs59705169	1	PASS	7.95564e-06	2	251394	0	0	113720	0	0	2670	0	0	242	0	0	42212	0	0	11490	0	0	26132	0	0	30974	0	0
10:96580252	G/C	CYP2C19	splice_acceptor_variant	NM_000769.2:c.820-1G>C		2 of 6 Predicted as Damaging	5.18	1	11.4092	24.6	0.999982	0.938									rs59705169	1	PASS	1.98891e-05	5	251394	0	0	113720	0	0	2670	0	0	242	0	0	42212	0	0	11490	0	0	26132	0	0	30974	0	3
10:96580260	-/A	CYP2C19	frameshift_variant	NM_000769.2:c.830dupA	NP_000760.1:p.Asn277Lysfs*5					24											rs772230916	1	PASS	3.97741e-06	1	251420	0	1	113736	0	0	2670	0	0	242	0	0	42208	0	0	11500	0	1	26132	0	0	30984	0	0
10:96580265	C/T	CYP2C19	stop_gained	NM_000769.2:c.832C>T	NP_000760.1:p.Gln278Ter	1 of 6 Predicted as Damaging	-1.541		1.996	35											rs751802597	1	PASS	1.19312e-05	3	251442	0	0	113750	0	0	2670	0	0	242	0	0	42214	0	0	11500	0	0	26132	0	0	30992	0	0
10:96580286	G/T	CYP2C19	stop_gained	NM_000769.2:c.853G>T	NP_000760.1:p.Glu285Ter	1 of 6 Predicted as Damaging	1.935	0.056	7.6652	36											rs141533135	1	PASS	3.9764e-06	1	251484	0	1	113764	0	0	2670	0	0	242	0	1	42220	0	0	11502	0	0	26134	0	0	30996	0	0
10:96580330	AG/-	CYP2C19	frameshift_variant	NM_000769.2:c.900_901delGA	NP_000760.1:p.Glu300Aspfs*22					39											rs1564675886	1	PASS	3.97636e-06	1	251486	0	0	113766	0	0	2670	0	0	242	0	0	42222	0	0	11502	0	0	26134	0	0	30996	0	0
10:96580371	T/-	CYP2C19	frameshift_variant	NM_000769.2:c.938delT	NP_000760.1:p.Leu313Argfs*2					24.6											rs773121944	1	PASS	3.97643e-06	1	251482	0	0	113760	0	0	2670	0	0	242	0	0	42218	0	0	11502	0	0	26134	0	0	30994	0	0
10:96580395	G/A	CYP2C19	splice_donor_variant	NM_000769.2:c.961+1G>A		2 of 6 Predicted as Damaging	5.18	1	11.4092	26.2	0.999978	0.936									rs200506574	1	PASS	2.38607e-05	6	251460	0	5	113752	0	0	2670	0	0	242	0	0	42212	0	0	11502	0	2	26134	0	3	30992	0	0
10:96602593	G/C	CYP2C19	splice_acceptor_variant	NM_000769.2:c.962-1G>C		2 of 6 Predicted as Damaging	8.985	1	12.64	27.3	0.99999	0.92									rs1480786901	1	PASS	3.98241e-06	1	251104	0	0	113412	0	0	2668	0	0	242	0	0	41946	0	0	11490	0	0	26134	0	0	30932	0	0
10:96602599	G/-	CYP2C19	frameshift_variant	NM_000769.2:c.967delG	NP_000760.1:p.Val323Serfs*48					28.7											rs1438877591	1	PASS	3.98054e-06	1	251222	0	0	113522	0	0	2668	0	0	242	0	0	42030	0	0	11492	0	0	26134	0	0	30956	0	0
10:96602692	G/C	CYP2C19	missense_variant	NM_000769.2:c.1060G>C	NP_000760.1:p.Glu354Gln	6 of 6 Predicted as Damaging	9.027	1	12.64	23.5											rs747508319	1	PASS	7.95722e-06	2	251344	0	0	113650	0	0	2668	0	0	242	0	0	42152	0	0	11494	0	0	26128	0	0	30966	0	0
10:96602692	G/A	CYP2C19	missense_variant	NM_000769.2:c.1060G>A	NP_000760.1:p.Glu354Lys	6 of 6 Predicted as Damaging	9.027	1	12.64	24.2											rs747508319	1	PASS	2.78503e-05	7	251344	0	3	113650	0	0	2668	0	0	242	0	0	42152	0	2	11494	0	1	26128	0	0	30966	0	0
10:96602727	-/CCTGC	CYP2C19	frameshift_variant	NM_000769.2:c.1097_1101dupTGCCC	NP_000760.1:p.His368Cysfs*5					17.38											rs776570369	1	PASS	3.97753e-06	1	251412	0	0	113714	0	0	2668	0	0	242	0	0	42198	0	0	11498	0	0	26134	0	0	30974	0	0
10:96602769	C/A	CYP2C19	stop_gained	NM_000769.2:c.1137C>A	NP_000760.1:p.Tyr379Ter	1 of 6 Predicted as Damaging	-0.371		4.9625	35											rs771120274	1	PASS	0.000171016	43	251438	1	0	113724	0	0	2668	0	0	242	0	0	42198	0	0	11496	0	0	26134	0	0	30986	0	0
10:96602782	G/C	CYP2C19	splice_donor_variant	NM_000769.2:c.1149+1G>C		2 of 6 Predicted as Damaging	8.982	1	12.64	25.8	0.99999	0.926									rs1210563088	1	PASS	3.97712e-06	1	251438	0	1	113718	0	0	2668	0	0	242	0	1	42190	0	0	11496	0	0	26134	0	0	30988	0	0
10:96609744	T/C	CYP2C19	missense_variant	NM_000769.2:c.1220T>C	NP_000760.1:p.Phe407Ser	6 of 6 Predicted as Damaging	6.94	1	7.1362	23.8											rs781013692	1	PASS	3.98004e-06	1	251254	0	0	113622	0	0	2668	0	0	242	0	0	42140	0	0	11492	0	0	26132	0	0	30948	0	0
10:96609815	G/C	CYP2C19	missense_variant	NM_000769.2:c.1291G>C	NP_000760.1:p.Gly431Arg	6 of 6 Predicted as Damaging	8.268	1	9.0009	26.2	0.999987	0.958									rs748034170	1	PASS	7.97372e-06	2	250824	0	0	113346	0	0	2668	0	0	242	0	0	41982	0	0	11478	0	0	26118	0	0	30858	0	1
10:96609816	G/T	CYP2C19	splice_donor_variant	NM_000769.2:c.1291+1G>T		2 of 6 Predicted as Damaging	8.268	1	12.9406	25.5	0.999973	0.95									rs1241269738	1	PASS	3.98686e-06	1	250824	0	1	113348	0	0	2668	0	0	242	0	1	41980	0	0	11476	0	0	26122	0	0	30860	0	0
10:96612489	G/C	CYP2C19	splice_acceptor_variant	NM_000769.2:c.1292-1G>C		2 of 6 Predicted as Damaging	8.387	1	12.2839	25	0.999983	0.9									rs746548445	1	PASS	7.96305e-06	2	251160	0	2	113594	0	0	2668	0	0	242	0	0	42144	0	1	11484	0	0	26122	0	1	30934	0	0
10:96612490	G/A	CYP2C19	missense_variant	NM_000769.2:c.1292G>A	NP_000760.1:p.Gly431Glu	6 of 6 Predicted as Damaging	8.433	1	12.2839	25.7	0.720488	0.454									rs770375701	1	PASS	1.19442e-05	3	251168	0	3	113596	0	0	2668	0	0	242	0	2	42144	0	0	11480	0	0	26124	0	1	30938	0	0
10:96612496	G/A	CYP2C19	missense_variant	NM_000769.2:c.1298G>A	NP_000760.1:p.Arg433Gln	6 of 6 Predicted as Damaging	8.433	1	12.2839	25.2											rs774840036	1	PASS	3.98124e-06	1	251178	0	0	113594	0	0	2668	0	0	242	0	0	42138	0	0	11480	0	0	26124	0	0	30942	0	0
10:96612502	G/A	CYP2C19	missense_variant	NM_000769.2:c.1304G>A	NP_000760.1:p.Cys435Tyr	6 of 6 Predicted as Damaging	8.433	1	12.2839	23.9											rs1255700938	1	PASS	3.98061e-06	1	251218	0	0	113612	0	0	2668	0	0	242	0	0	42148	0	0	11484	0	0	26124	0	0	30946	0	0
10:96612507	G/A	CYP2C19	missense_variant	NM_000769.2:c.1309G>A	NP_000760.1:p.Gly437Arg	6 of 6 Predicted as Damaging	8.433	1	12.2839	24.1											rs1437042029	1	PASS	3.98016e-06	1	251246	0	0	113640	0	0	2668	0	0	242	0	0	42164	0	0	11486	0	0	26126	0	0	30954	0	0
10:96612510	G/T	CYP2C19	stop_gained	NM_000769.2:c.1312G>T	NP_000760.1:p.Glu438Ter	2 of 6 Predicted as Damaging	8.433	1	8.5069	36											rs1187954902	1	PASS	3.97985e-06	1	251266	0	1	113642	0	0	2668	0	0	242	0	0	42166	0	0	11490	0	0	26124	0	1	30952	0	0
10:96612519	G/A	CYP2C19	missense_variant	NM_000769.2:c.1321G>A	NP_000760.1:p.Ala441Thr	6 of 6 Predicted as Damaging	6.651	1	12.2839	25.7											rs1564687455	1	PASS	3.97924e-06	1	251304	0	1	113666	0	0	2668	0	0	242	0	0	42176	0	0	11490	0	0	26132	0	1	30958	0	0
10:96612520	C/T	CYP2C19	missense_variant	NM_000769.2:c.1322C>T	NP_000760.1:p.Ala441Val	6 of 6 Predicted as Damaging	6.689	1	12.2839	25.7											rs1478149305	1	PASS	3.97909e-06	1	251314	0	0	113676	0	0	2668	0	0	242	0	0	42176	0	0	11488	0	0	26132	0	0	30970	0	0
10:96612538	T/A	CYP2C19	stop_gained	NM_000769.2:c.1340T>A	NP_000760.1:p.Leu447Ter	2 of 6 Predicted as Damaging	6.876	0.928	9.787	41											rs1361457533	1	PASS	3.9789e-06	1	251326	0	0	113680	0	0	2668	0	0	242	0	0	42182	0	0	11490	0	0	26130	0	0	30968	0	0
10:96701614	G/C	CYP2C9	splice_acceptor_variant	NM_000771.3:c.169-1G>C		2 of 6 Predicted as Damaging	7.785	1	12.981	23.4	0.999972	0.816									rs1272084617	1	PASS	3.97886e-06	1	251328	0	1	113670	0	0	2668	0	0	242	0	1	42162	0	0	11490	0	0	26134	0	0	30974	0	0
10:96701620	-/AAAG	CYP2C9	frameshift_variant	NM_000771.3:c.174_177dupAAAG	NP_000762.2:p.Val60Lysfs*23					23.1											rs767093588	1	PASS	3.97871e-06	1	251338	0	1	113676	0	0	2668	0	0	242	0	0	42164	0	0	11492	0	1	26134	0	0	30976	0	0
10:96701641	CA/-	CYP2C9	frameshift_variant	NM_000771.3:c.196_197delAC	NP_000762.2:p.Thr66Serfs*15					24.4											rs1414631924	1	PASS	3.9781e-06	1	251376	0	1	113700	0	0	2668	0	0	242	0	1	42186	0	0	11496	0	0	26134	0	0	30974	0	0
10:96701719	AGAGGAGTTTTCTGGA/-	CYP2C9	frameshift_variant	NM_000771.3:c.278_293del	NP_000762.2:p.Glu93Alafs*32					25.4											rs750075832	1	PASS	3.97763e-06	1	251406	0	0	113726	0	0	2668	0	0	242	0	0	42198	0	0	11502	0	0	26134	0	0	30982	0	0
10:96702099	G/T	CYP2C9	splice_donor_variant	NM_000771.3:c.481+1G>T		2 of 6 Predicted as Damaging	7.484	1	7.4604	23.4	0.999966	0.886									rs1253395922	1	PASS	3.98241e-06	1	251104	0	0	113464	0	0	2670	0	0	242	0	0	42018	0	0	11498	0	0	26134	0	0	30902	0	0
10:96707616	G/-	CYP2C9	frameshift_variant	NM_000771.3:c.562delG	NP_000762.2:p.Asp188Ilefs*10					28.5											rs758778922	1	PASS	3.9834e-06	1	251042	0	1	113506	0	0	2668	0	0	242	0	0	42072	0	0	11478	0	0	26122	0	1	30924	0	0
10:96707625	G/-	CYP2C9	frameshift_variant	NM_000771.3:c.571delG	NP_000762.2:p.Asp191Ilefs*7					26.3											rs777921891	1	PASS	1.59345e-05	4	251028	0	0	113496	0	0	2668	0	0	242	0	0	42072	0	0	11474	0	0	26120	0	0	30920	0	0
10:96707637	CTTAA/-	CYP2C9	frameshift_variant	NM_000771.3:c.588_592delCTTAA	NP_000762.2:p.Leu197Glyfs*5					22.3											rs1281128973	1	PASS	3.9846e-06	1	250966	0	1	113446	0	0	2668	0	0	242	0	0	42038	0	0	11470	0	0	26122	0	1	30906	0	0
10:96707650	A/-	CYP2C9	frameshift_variant	NM_000771.3:c.599delA	NP_000762.2:p.Lys200Serfs*2					22.6											rs771127798	1	PASS	3.98559e-06	1	250904	0	1	113406	0	0	2668	0	0	242	0	0	42022	0	1	11480	0	0	26116	0	0	30878	0	0
10:96708864	G/C	CYP2C9	splice_acceptor_variant	NM_000771.3:c.643-1G>C		2 of 6 Predicted as Damaging	7.553	1	12.3971	23.5	0.999979	0.932									rs759708513	1	PASS	1.23872e-05	3	242186	0	0	110532	0	0	2632	0	0	238	0	0	40998	0	0	11164	0	0	25522	0	0	29978	0	0
10:96708959	A/-	CYP2C9	frameshift_variant	NM_000771.3:c.741delA	NP_000762.2:p.Val248Terfs					23											rs775108214	1	PASS	8.11517e-06	2	246452	0	0	112312	0	0	2660	0	0	238	0	0	41356	0	0	11444	0	0	26038	0	0	30576	0	0
10:96708970	G/T	CYP2C9	stop_gained	NM_000771.3:c.748G>T	NP_000762.2:p.Glu250Ter	1 of 6 Predicted as Damaging	0.506	0.085	10.2901	36											rs945414728	1	PASS	4.05785e-06	1	246436	0	1	112392	0	0	2654	0	0	238	0	0	41474	0	1	11428	0	0	26012	0	0	30586	0	0
10:96708976	C/T	CYP2C9	stop_gained	NM_000771.3:c.754C>T	NP_000762.2:p.Gln252Ter	1 of 6 Predicted as Damaging	-1.475		6.3438	35											rs1253597502	1	PASS	4.05785e-06	1	246436	0	1	112312	0	0	2656	0	0	240	0	0	41354	0	0	11430	0	1	26018	0	0	30614	0	0
10:96708979	G/T	CYP2C9	stop_gained	NM_000771.3:c.757G>T	NP_000762.2:p.Glu253Ter	1 of 6 Predicted as Damaging	0.762	0.1	5.3116	35											rs777095173	1	PASS	4.05042e-06	1	246888	0	1	112490	0	0	2658	0	0	240	0	0	41492	0	1	11434	0	0	26016	0	0	30650	0	0
10:96709035	G/-	CYP2C9	frameshift_variant	NM_000771.3:c.814delG	NP_000762.2:p.Glu272Argfs*35					16.7											rs1564709973	1	PASS	4.00808e-06	1	249496	0	1	113088	0	0	2668	0	0	240	0	1	41844	0	0	11456	0	0	26094	0	0	30786	0	0
10:96731942	A/G	CYP2C9	missense_variant	NM_000771.3:c.901A>G	NP_000762.2:p.Thr301Ala	6 of 6 Predicted as Damaging	3.834	1	9.2946	24											rs1276877697	1	PASS	3.97918e-06	1	251308	0	1	113674	0	0	2668	0	0	242	0	1	42180	0	0	11500	0	0	26132	0	0	30952	0	0
10:96731943	C/T	CYP2C9	missense_variant	NM_000771.3:c.902C>T	NP_000762.2:p.Thr301Met	6 of 6 Predicted as Damaging	4.731	0.999	11.6787	25											rs757970831	1	PASS	2.78552e-05	7	251300	0	1	113672	0	0	2668	0	0	242	0	0	42170	0	1	11500	0	0	26132	0	0	30960	0	0
10:96731947	A/-	CYP2C9	frameshift_variant	NM_000771.3:c.907delA	NP_000762.2:p.Ser303Alafs*4					25.1											rs768422675	1	PASS	3.97912e-06	1	251312	0	1	113676	0	0	2668	0	0	242	0	0	42180	0	0	11498	0	1	26132	0	0	30956	0	0
10:96740942	-/A	CYP2C9	frameshift_variant	NM_000771.3:c.966dupA	NP_000762.2:p.Val323Serfs*6					27.7											rs767003960	1	PASS	1.19528e-05	3	250988	0	0	113398	0	0	2668	0	0	242	0	0	41960	0	0	11482	0	0	26126	0	0	30920	0	3
10:96740948	C/T	CYP2C9	stop_gained	NM_000771.3:c.970C>T	NP_000762.2:p.Gln324Ter	2 of 6 Predicted as Damaging	3.127	0.994	13.0432	40											rs1454934321	1	PASS	3.98375e-05	10	251020	0	0	113426	0	0	2668	0	0	242	0	0	41990	0	0	11486	0	0	26124	0	0	30916	0	0
10:96740949	A/-	CYP2C9	frameshift_variant	NM_000771.3:c.971delA	NP_000762.2:p.Gln324Argfs*7					33											rs750112878	1	PASS	7.96749e-06	2	251020	0	0	113426	0	0	2668	0	0	242	0	0	41990	0	0	11486	0	0	26124	0	0	30916	0	1
10:96740990	-/A	CYP2C9	frameshift_variant	NM_000771.3:c.1011_1012insA	NP_000762.2:p.Cys338Metfs*23					24.7											rs760277731	1	PASS	1.19437e-05	3	251178	0	3	113554	0	0	2668	0	0	242	0	0	42094	0	0	11484	0	2	26130	0	1	30936	0	0
10:96740996	C/T	CYP2C9	stop_gained	NM_000771.3:c.1018C>T	NP_000762.2:p.Gln340Ter	2 of 6 Predicted as Damaging	1.488	1	6.1384	37											rs767109263	1	PASS	1.99046e-05	5	251198	0	0	113568	0	0	2668	0	0	242	0	0	42096	0	0	11484	0	0	26132	0	0	30946	0	0
10:96741038	G/T	CYP2C9	stop_gained	NM_000771.3:c.1060G>T	NP_000762.2:p.Glu354Ter	2 of 6 Predicted as Damaging	6.658	1	9.3127	38											rs749060448	1	PASS	3.98191e-06	1	251136	0	0	113570	0	0	2668	0	0	242	0	0	42114	0	0	11488	0	0	26132	0	0	30926	0	0
10:96741047	A/G	CYP2C9	missense_variant	NM_000771.3:c.1069A>G	NP_000762.2:p.Arg357Gly	6 of 6 Predicted as Damaging	1.187	1	7.7859	23.8											rs1245952274	1	PASS	3.98165e-06	1	251152	0	1	113562	0	0	2668	0	0	242	0	1	42116	0	0	11488	0	0	26124	0	0	30924	0	0
10:96741128	G/A	CYP2C9	splice_donor_variant	NM_000771.3:c.1149+1G>A		2 of 6 Predicted as Damaging	6.62	1	8.4626	22.5	0.999958	0.882									rs542577750	1	PASS	5.97286e-05	15	251136	0	0	113544	0	0	2668	0	0	242	0	0	42072	0	0	11492	0	0	26126	0	0	30944	0	0
10:96745923	T/C	CYP2C9	missense_variant	NM_000771.3:c.1283T>C	NP_000762.2:p.Phe428Ser	6 of 6 Predicted as Damaging	6.759	1	10.3869	26.2											rs765301608	1	PASS	3.98619e-06	1	250866	0	0	113378	0	0	2668	0	0	240	0	0	42020	0	0	11474	0	0	26122	0	0	30854	0	0
10:96745931	G/C	CYP2C9	missense_variant	NM_000771.3:c.1291G>C	NP_000762.2:p.Gly431Arg	6 of 6 Predicted as Damaging	4.471	1	9.312	25.9	0.999988	0.998									rs1441296358	1	PASS	3.98972e-06	1	250644	0	1	113238	0	0	2668	0	0	240	0	0	41932	0	0	11464	0	0	26112	0	1	30822	0	0
10:96745932	G/T	CYP2C9	splice_donor_variant	NM_000771.3:c.1291+1G>T		2 of 6 Predicted as Damaging	6.544	1	10.2329	23.8	0.999895	0.804									rs750312180	1	PASS	4.7882e-05	12	250616	0	1	113214	0	0	2668	0	0	240	0	0	41922	0	0	11460	0	0	26108	0	1	30816	0	0
10:96748603	G/A	CYP2C9	splice_acceptor_variant	NM_000771.3:c.1292-1G>A		2 of 6 Predicted as Damaging	8.022	1	12.6943	26.4	0.999966	0.944									rs768961868	1	PASS	7.95786e-06	2	251324	0	0	113682	0	0	2668	0	0	242	0	0	42182	0	0	11494	0	0	26132	0	0	30964	0	0
10:96748609	C/T	CYP2C9	missense_variant	NM_000771.3:c.1297C>T	NP_000762.2:p.Arg433Trp	6 of 6 Predicted as Damaging	1.239	1	7.7174	23.9											rs776908257	1	PASS	4.37651e-05	11	251342	0	1	113692	0	0	2668	0	0	242	0	1	42200	0	0	11496	0	0	26132	0	0	30954	0	0
10:96748610	G/A	CYP2C9	missense_variant	NM_000771.3:c.1298G>A	NP_000762.2:p.Arg433Gln	6 of 6 Predicted as Damaging	8.022	1	12.6943	25.6											rs867464190	1	PASS	3.9788e-06	1	251332	0	1	113698	0	0	2666	0	0	242	0	0	42200	0	0	11492	0	0	26132	0	1	30966	0	0
10:96748616	G/C	CYP2C9	missense_variant	NM_000771.3:c.1304G>C	NP_000762.2:p.Cys435Ser	6 of 6 Predicted as Damaging	8.022	1	10.0219	23.3											rs1239884908	1	PASS	3.97833e-06	1	251362	0	0	113710	0	0	2668	0	0	242	0	0	42198	0	0	11494	0	0	26132	0	0	30976	0	0
10:96748621	G/A	CYP2C9	missense_variant	NM_000771.3:c.1309G>A	NP_000762.2:p.Gly437Arg	6 of 6 Predicted as Damaging	8.022	1	12.6943	25.6											rs1412605802	1	PASS	3.97823e-06	1	251368	0	0	113716	0	0	2668	0	0	242	0	0	42200	0	0	11496	0	0	26132	0	0	30978	0	0
10:96748634	C/T	CYP2C9	missense_variant	NM_000771.3:c.1322C>T	NP_000762.2:p.Ala441Val	6 of 6 Predicted as Damaging	6.364	1	12.6943	24											rs565889722	1	PASS	2.78472e-05	7	251372	0	6	113720	0	0	2668	0	0	242	0	3	42200	0	0	11498	0	1	26130	0	2	30982	0	0
10:96748672	C/T	CYP2C9	stop_gained	NM_000771.3:c.1360C>T	NP_000762.2:p.Gln454Ter	2 of 6 Predicted as Damaging	6.364	1	12.6943	41											rs781427480	1	PASS	3.97795e-06	1	251386	0	0	113736	0	0	2668	0	0	242	0	0	42202	0	0	11502	0	0	26134	0	0	30988	0	0
10:96748735	G/-	CYP2C9	frameshift_variant	NM_000771.3:c.1424delG	NP_000762.2:p.Gly475Aspfs					24.1											rs758947599	1	PASS	7.95608e-06	2	251380	0	2	113722	0	0	2668	0	0	242	0	0	42196	0	2	11502	0	0	26134	0	0	30980	0	0
22:42522580	C/G	CYP2D6	missense_variant	NM_000106.5:c.1490G>C	NP_000097.3:p.Arg497Pro	6 of 6 Predicted as Damaging	3.947	1	8.3687	24											rs1440526469	1	PASS	4.32855e-06	1	231024	0	1	105126	0	0	2552	0	0	234	0	0	37962	0	0	10966	0	0	25416	0	1	27996	0	0
22:42522580	C/T	CYP2D6	missense_variant	NM_000106.5:c.1490G>A	NP_000097.3:p.Arg497His	6 of 6 Predicted as Damaging	3.947	1	8.3687	24											rs1440526469	1	PASS	8.65711e-06	2	231024	0	1	105126	0	0	2552	0	0	234	0	0	37962	0	0	10966	0	1	25416	0	0	27996	0	0
22:42523538	C/G	CYP2D6	missense_variant	NM_000106.5:c.1084G>C	NP_000097.3:p.Glu362Gln	6 of 6 Predicted as Damaging	5.896	1	17.7329	27.2											rs773966528	1	PASS	3.98533e-06	1	250920	0	0	113410	0	0	2668	0	0	242	0	0	42078	0	0	11494	0	0	26052	0	0	30876	0	0
22:42523547	C/G	CYP2D6	missense_variant	NM_000106.5:c.1075G>C	NP_000097.3:p.Val359Leu	6 of 6 Predicted as Damaging	7.588	1	17.7329	24.7											rs79489631	1	PASS	3.98552e-06	1	250908	0	1	113408	0	0	2666	0	0	242	0	0	42084	0	0	11490	0	0	26046	0	1	30880	0	0
22:42523547	C/T	CYP2D6	missense_variant	NM_000106.5:c.1075G>A	NP_000097.3:p.Val359Met	6 of 6 Predicted as Damaging	7.588	1	17.7329	25.2											rs79489631	1	PASS	3.98552e-06	1	250908	0	1	113408	0	0	2666	0	0	242	0	0	42084	0	0	11490	0	0	26046	0	1	30880	0	0
22:42523549	G/A	CYP2D6	missense_variant	NM_000106.5:c.1073C>T	NP_000097.3:p.Ala358Val	6 of 6 Predicted as Damaging	9.567	1	17.7329	25.2											rs367922258	1	PASS	1.59402e-05	4	250938	0	4	113430	0	0	2668	0	0	242	0	2	42090	0	0	11492	0	1	26054	0	1	30884	0	0
22:42523550	C/A	CYP2D6	missense_variant	NM_000106.5:c.1072G>T	NP_000097.3:p.Ala358Ser	6 of 6 Predicted as Damaging	7.588	1	17.7329	24.4											rs1355869917	1	PASS	3.98502e-06	1	250940	0	0	113434	0	0	2668	0	0	242	0	0	42092	0	0	11492	0	0	26052	0	0	30888	0	0
22:42523574	G/A	CYP2D6	stop_gained	NM_000106.5:c.1048C>T	NP_000097.3:p.Gln350Ter	2 of 6 Predicted as Damaging	2.293	0.999	12.8048	45											rs748850584	1	PASS	7.96832e-06	2	250994	0	2	113476	0	0	2666	0	0	242	0	0	42120	0	0	11486	0	2	26058	0	0	30904	0	0
22:42523601	G/A	CYP2D6	stop_gained	NM_000106.5:c.1021C>T	NP_000097.3:p.Gln341Ter	1 of 6 Predicted as Damaging	-0.171		10.6236	45											rs1230699203	1	PASS	3.98419e-06	1	250992	0	1	113502	0	0	2668	0	0	238	0	1	42160	0	0	11488	0	0	26042	0	0	30906	0	0
22:42523603	C/T	CYP2D6	missense_variant	NM_000106.5:c.1019G>A	NP_000097.3:p.Gly340Glu	6 of 6 Predicted as Damaging	7.561	1	17.7329	28.4											rs1041305578	1	PASS	1.19527e-05	3	250990	0	1	113496	0	0	2668	0	0	238	0	1	42160	0	0	11490	0	0	26034	0	0	30906	0	0
22:42523604	C/G	CYP2D6	missense_variant	NM_000106.5:c.1018G>C	NP_000097.3:p.Gly340Arg	6 of 6 Predicted as Damaging	5.673	1	17.7329	29.3											rs566108360	1	PASS	3.98444e-06	1	250976	0	0	113494	0	0	2668	0	0	238	0	0	42158	0	0	11490	0	0	26036	0	0	30904	0	0
22:42523610	-/C	CYP2D6	frameshift_variant	NM_000106.5:c.1012dupG	NP_000097.3:p.Val338Glyfs*12					25.8											rs1569020058	1	PASS	1.19536e-05	3	250970	0	3	113492	0	0	2668	0	2	238	0	0	42152	0	0	11490	0	0	26036	0	1	30908	0	0
22:42523625	G/A	CYP2D6	stop_gained	NM_000106.5:c.997C>T	NP_000097.3:p.Gln333Ter	1 of 6 Predicted as Damaging	0.819	0.201	7.8852	47											rs779957833	1	PASS	3.98505e-06	1	250938	0	1	113470	0	0	2664	0	0	240	0	0	42154	0	1	11488	0	0	26024	0	0	30900	0	0
22:42523628	G/A	CYP2D6	stop_gained	NM_000106.5:c.994C>T	NP_000097.3:p.Gln332Ter	2 of 6 Predicted as Damaging	7.529	1	17.7329	54											rs746824661	1	PASS	3.98562e-06	1	250902	0	0	113462	0	0	2664	0	0	240	0	0	42148	0	0	11488	0	0	26024	0	0	30898	0	0
22:42523876	A/T	CYP2D6	missense_variant	NM_000106.5:c.953T>A	NP_000097.3:p.Leu318His	6 of 6 Predicted as Damaging	5.006	0.402	6.7862	25											rs773889591	1	PASS	3.98314e-06	1	251058	0	0	113548	0	0	2668	0	0	238	0	0	42150	0	0	11494	0	0	26066	0	0	30932	0	0
22:42523897	G/T	CYP2D6	stop_gained	NM_000106.5:c.932C>A	NP_000097.3:p.Ser311Ter	2 of 6 Predicted as Damaging	6.412	0.988	11.7912	42											rs1135830	1	PASS	7.96521e-06	2	251092	0	2	113574	0	0	2668	0	0	240	0	0	42168	0	0	11496	0	0	26064	0	2	30938	0	0
22:42523903	G/T	CYP2D6	missense_variant	NM_000106.5:c.926C>A	NP_000097.3:p.Thr309Asn	6 of 6 Predicted as Damaging	5.47	1	13.6827	23.4											rs1180181277	1	PASS	3.98279e-06	1	251080	0	0	113566	0	0	2668	0	0	240	0	0	42164	0	0	11494	0	0	26064	0	0	30936	0	0
22:42523913	C/T	CYP2D6	missense_variant	NM_000106.5:c.916G>A	NP_000097.3:p.Gly306Arg	6 of 6 Predicted as Damaging	4.762	0.995	16.0112	24.9											rs747462046	1	PASS	3.98264e-06	1	251090	0	0	113574	0	0	2668	0	0	240	0	0	42170	0	0	11496	0	0	26066	0	0	30934	0	0
22:42524861	G/C	CYP2D6	stop_gained	NM_000106.5:c.591C>G	NP_000097.3:p.Tyr197Ter	1 of 6 Predicted as Damaging	-0.552		8.9693	34											rs375487723	1	PASS	4.37621e-06	1	228508	0	0	101170	0	0	2204	0	0	224	0	0	40708	0	0	9750	0	0	20462	0	0	27822	0	0
22:42525089	G/-	CYP2D6	frameshift_variant	NM_000106.5:c.451delC	NP_000097.3:p.Gln151Serfs*3					37											rs1569025664	1	PASS	4.0835e-06	1	244888	0	0	110710	0	0	2618	0	0	230	0	0	41612	0	0	11136	0	0	25242	0	0	29872	0	0
22:42525145	C/G	CYP2D6	missense_variant	NM_000106.5:c.395G>C	NP_000097.3:p.Arg132Thr	6 of 6 Predicted as Damaging	5.139	0.994	8.9735	23.2											rs752758046	1	PASS	4.08991e-06	1	244504	0	0	111494	0	0	2630	0	0	232	0	0	41512	0	0	11290	0	0	25710	0	0	30120	0	0
22:42525145	C/T	CYP2D6	missense_variant	NM_000106.5:c.395G>A	NP_000097.3:p.Arg132Lys	6 of 6 Predicted as Damaging	5.139	0.994	8.9735	23.1											rs752758046	1	PASS	4.08991e-06	1	244504	0	0	111494	0	0	2630	0	0	232	0	0	41512	0	0	11290	0	0	25710	0	0	30120	0	0
22:42525149	G/A	CYP2D6	stop_gained	NM_000106.5:c.391C>T	NP_000097.3:p.Gln131Ter	2 of 6 Predicted as Damaging	4.05	1	11.7429	41											rs1395910637	1	PASS	4.09792e-06	1	244026	0	0	111380	0	0	2626	0	0	230	0	0	41460	0	0	11282	0	0	25714	0	0	30068	0	0
22:42525152	C/A	CYP2D6	stop_gained	NM_000106.5:c.388G>T	NP_000097.3:p.Glu130Ter	1 of 6 Predicted as Damaging	0.051	0.002	8.0638	37											rs771490928	1	PASS	8.2197e-06	2	243318	0	0	111202	0	0	2620	0	0	228	0	0	41396	0	0	11262	0	0	25696	0	0	30000	0	0
22:42525158	A/G	CYP2D6	missense_variant	NM_000106.5:c.382T>C	NP_000097.3:p.Trp128Arg	6 of 6 Predicted as Damaging	4.986	1	8.4969	23.1											rs376636053	1	PASS	2.06021e-05	5	242694	1	0	111084	0	0	2618	0	0	228	0	0	41304	0	0	11258	0	0	25726	0	0	29950	0	5
22:42525168	A/C	CYP2D6	stop_gained	NM_000106.5:c.372T>G	NP_000097.3:p.Tyr124Ter	1 of 6 Predicted as Damaging	-2.488		9.0158	35											rs766391487	1	PASS	2.07153e-05	5	241368	0	1	110828	0	0	2602	0	0	226	0	1	41222	0	0	11228	0	0	25702	0	0	29848	0	0
22:42526682	GG/-	CYP2D6	frameshift_variant	NM_000106.5:c.111_112delCC	NP_000097.3:p.Leu38Alafs*215					15.99											rs1287287392	1	PASS	8.15581e-06	2	245224	0	2	110248	0	0	2568	0	0	234	0	2	41258	0	0	11162	0	0	25152	0	0	29874	0	0
22:42526684	G/T	CYP2D6	missense_variant	NM_000106.5:c.110C>A	NP_000097.3:p.Pro37His	6 of 6 Predicted as Damaging	7.211	1	14.6963	23.7											rs1288096759	1	PASS	4.09467e-06	1	244220	0	0	109730	0	0	2568	0	0	232	0	0	41164	0	0	11080	0	0	24952	0	0	29734	0	0
7:99245941	-/A	CYP3A5	frameshift_variant	NM_000777.4:c.1496dupT	NP_000768.1:p.Ser500Lysfs					23											rs760945831	1	PASS	3.98581e-06	1	250890	0	1	113520	0	0	2664	0	0	240	0	0	42106	0	1	11488	0	0	26118	0	0	30904	0	0
7:99247731	G/A	CYP3A5	stop_gained	NM_000777.4:c.1378C>T	NP_000768.1:p.Gln460Ter	2 of 6 Predicted as Damaging	7.271	1	15.1921	38											rs149664815	1	PASS	7.95437e-05	20	251434	0	0	113730	0	0	2668	0	0	242	0	0	42204	0	0	11502	0	0	26128	0	0	30986	0	16
7:99247737	CT/-	CYP3A5	frameshift_variant	NM_000777.4:c.1371_1372delAG	NP_000768.1:p.Arg457Serfs*11					23.5											rs751249542	1	PASS	7.95418e-06	2	251440	0	0	113732	0	0	2668	0	0	242	0	0	42204	0	0	11502	0	0	26132	0	0	30984	0	0
7:99247769	G/A	CYP3A5	missense_variant	NM_000777.4:c.1340C>T	NP_000768.1:p.Ala447Val	6 of 6 Predicted as Damaging	5.206	1	12.5724	24.4											rs147472467	1	PASS	7.95406e-06	2	251444	0	2	113728	0	0	2668	0	0	242	0	1	42204	0	0	11498	0	0	26132	0	1	30984	0	0
7:99247782	C/T	CYP3A5	missense_variant	NM_000777.4:c.1327G>A	NP_000768.1:p.Gly443Ser	6 of 6 Predicted as Damaging	5.641	1	15.1921	28.6											rs377454308	1	PASS	3.97697e-06	1	251448	0	1	113728	0	0	2668	0	0	242	0	1	42200	0	0	11500	0	0	26132	0	0	30986	0	0
7:99250176	C/A	CYP3A5	missense_variant	NM_000777.4:c.1253G>T	NP_000768.1:p.Arg418Met	6 of 6 Predicted as Damaging	7.311	1	15.492	34	0.99999	0.972									rs370299887	1	PASS	1.23624e-05	3	242672	0	0	109776	0	0	2646	0	0	234	0	0	39980	0	0	11312	0	0	26060	0	0	29544	0	2
7:99250197	G/C	CYP3A5	missense_variant	NM_000777.4:c.1232C>G	NP_000768.1:p.Pro411Arg	6 of 6 Predicted as Damaging	6.146	1	15.492	26.9											rs1299406057	1	PASS	3.99814e-06	1	250116	0	1	112998	0	0	2662	0	0	240	0	1	41776	0	0	11464	0	0	26118	0	0	30738	0	0
7:99250198	G/A	CYP3A5	missense_variant	NM_000777.4:c.1231C>T	NP_000768.1:p.Pro411Ser	6 of 6 Predicted as Damaging	5.16	1	11.0262	25.2											rs756677833	1	PASS	5.99592e-05	15	250170	0	0	113030	0	0	2662	0	0	240	0	0	41794	0	0	11464	0	0	26116	0	0	30754	0	0
7:99250290	T/-	CYP3A5	frameshift_variant	NM_000777.4:c.1139delA	NP_000768.1:p.Asp380Valfs*16					30											rs1387559334	1	PASS	3.97728e-06	1	251428	0	0	113724	0	0	2668	0	0	242	0	0	42204	0	0	11498	0	0	26124	0	0	30988	0	1
7:99250332	A/T	CYP3A5	stop_gained	NM_000777.4:c.1097T>A	NP_000768.1:p.Leu366Ter	2 of 6 Predicted as Damaging	8.716	0.964	12.4147	36											rs757522026	1	PASS	7.95444e-06	2	251432	0	0	113734	0	0	2668	0	0	242	0	0	42208	0	0	11500	0	0	26128	0	0	30988	0	0
7:99250338	A/T	CYP3A5	missense_variant	NM_000777.4:c.1091T>A	NP_000768.1:p.Leu364His	6 of 6 Predicted as Damaging	6.787	1	12.4147	26.4											rs779306884	1	PASS	3.97725e-06	1	251430	0	1	113736	0	0	2668	0	0	242	0	0	42210	0	1	11500	0	0	26126	0	0	30990	0	0
7:99250341	G/-	CYP3A5	frameshift_variant	NM_000777.4:c.1088delC	NP_000768.1:p.Thr363Asnfs*33					27.9											rs755871374	1	PASS	7.95475e-06	2	251422	0	2	113730	0	0	2668	0	0	242	0	1	42206	0	0	11498	0	0	26126	0	1	30990	0	0
7:99250344	T/C	CYP3A5	missense_variant	NM_000777.4:c.1085A>G	NP_000768.1:p.Glu362Gly	6 of 6 Predicted as Damaging	7.519	1	12.4147	28.3											rs1245832664	1	PASS	3.97747e-06	1	251416	0	1	113728	0	0	2668	0	0	242	0	1	42204	0	0	11498	0	0	26128	0	0	30988	0	0
7:99250345	C/A	CYP3A5	stop_gained	NM_000777.4:c.1084G>T	NP_000768.1:p.Glu362Ter	2 of 6 Predicted as Damaging	7.311	1	15.492	39											rs1448299493	1	PASS	7.95539e-06	2	251402	0	1	113718	0	0	2668	0	0	242	0	1	42198	0	0	11498	0	0	26128	0	0	30984	0	1
7:99250369	-/C	CYP3A5	frameshift_variant	NM_000777.4:c.1060dupG	NP_000768.1:p.Glu354Glyfs*4					34											rs779671620	1	PASS	3.9795e-06	1	251288	0	1	113664	0	0	2668	0	0	242	0	0	42172	0	0	11496	0	0	26120	0	1	30966	0	0
7:99250372	TCTGTACCACGGCATCATAGGTAGG/-	CYP3A5	frameshift_variant	NM_000777.4:c.1033_1057del	NP_000768.1:p.Pro345Trpfs*8					35											rs748831637	1	PASS	7.95925e-06	2	251280	0	2	113672	0	0	2668	0	0	242	0	2	42176	0	0	11494	0	0	26122	0	0	30970	0	0
7:99250403	C/G	CYP3A5	splice_acceptor_variant	NM_000777.4:c.1027-1G>C		2 of 6 Predicted as Damaging	7.283	1	15.492	24.9	0.999982	0.938									rs767785315	1	PASS	4.00808e-06	1	249496	0	0	112714	0	0	2664	0	0	236	0	0	41664	0	0	11420	0	0	26072	0	0	30658	0	0
7:99258120	A/G	CYP3A5	splice_donor_variant	NM_000777.4:c.1026+2T>C		2 of 6 Predicted as Damaging	5.833	1	11.7738	26.2	0.999868	0.9									rs746690864	1	PASS	4.02755e-06	1	248290	0	0	112666	0	0	2664	0	0	242	0	0	41664	0	0	11448	0	0	26064	0	0	30584	0	0
7:99258175	G/A	CYP3A5	missense_variant	NM_000777.4:c.973C>T	NP_000768.1:p.Pro325Ser	6 of 6 Predicted as Damaging	9.304	1	10.2453	24.1											rs776760466	1	PASS	1.59176e-05	4	251294	0	0	113696	0	0	2670	0	0	242	0	0	42180	0	0	11498	0	0	26132	0	0	30974	0	0
7:99258222	G/A	CYP3A5	missense_variant	NM_000777.4:c.926C>T	NP_000768.1:p.Thr309Ile	6 of 6 Predicted as Damaging	9.304	1	14.7079	24											rs766695006	1	PASS	7.95817e-06	2	251314	0	0	113704	0	0	2670	0	0	242	0	0	42196	0	0	11498	0	0	26128	0	0	30970	0	0
7:99258222	G/T	CYP3A5	missense_variant	NM_000777.4:c.926C>A	NP_000768.1:p.Thr309Asn	6 of 6 Predicted as Damaging	9.304	1	14.7079	23.7											rs766695006	1	PASS	7.95817e-06	2	251314	0	2	113704	0	0	2670	0	0	242	0	1	42196	0	0	11498	0	0	26128	0	1	30970	0	0
7:99258247	T/-	CYP3A5	frameshift_variant	NM_000777.4:c.901delA	NP_000768.1:p.Ile301Serfs*60					21.3											rs1218326641	1	PASS	3.97788e-06	1	251390	0	0	113724	0	0	2670	0	0	242	0	0	42198	0	0	11496	0	0	26130	0	0	30988	0	0
7:99260451	C/A	CYP3A5	stop_gained	NM_000777.4:c.853G>T	NP_000768.1:p.Glu285Ter	1 of 6 Predicted as Damaging	-0.275		1.0031	33											rs774855888	1	PASS	1.59085e-05	4	251438	0	0	113718	0	0	2670	0	0	242	0	0	42204	0	0	11494	0	0	26132	0	0	30976	0	0
7:99260462	G/T	CYP3A5	stop_gained	NM_000777.4:c.842C>A	NP_000768.1:p.Ser281Ter	1 of 6 Predicted as Damaging	0.603		4.9898	34											rs111371159	1	PASS	3.97716e-06	1	251436	0	0	113716	0	0	2670	0	0	242	0	0	42198	0	0	11490	0	0	26132	0	0	30984	0	1
7:99260502	G/A	CYP3A5	stop_gained	NM_000777.4:c.802C>T	NP_000768.1:p.Arg268Ter	1 of 6 Predicted as Damaging	1.528	0.054	10.0863	35											rs148176345	1	PASS	6.76299e-05	17	251368	0	6	113676	0	0	2670	0	0	242	0	4	42178	0	0	11490	0	0	26132	0	2	30964	0	4
7:99261596	G/A	CYP3A5	stop_gained	NM_000777.4:c.793C>T	NP_000768.1:p.Gln265Ter	1 of 6 Predicted as Damaging	-0.662		12.0995	34											rs763775338	1	PASS	4.56817e-06	1	218906	0	1	105596	0	0	2604	0	0	228	0	0	38296	0	0	11156	0	0	25128	0	1	28184	0	0
7:99261613	CTTTTCTT/-	CYP3A5	frameshift_variant	NM_000777.4:c.769_776delAAGAAAAG	NP_000768.1:p.Lys257Serfs*18					26											rs1317716642	1	PASS	4.37353e-06	1	228648	0	1	108268	0	0	2644	0	0	230	0	1	39472	0	0	11308	0	0	25464	0	0	29150	0	0
7:99261643	A/T	CYP3A5	stop_gained	NM_000777.4:c.746T>A	NP_000768.1:p.Leu249Ter	2 of 6 Predicted as Damaging	6.921	1	11.9716	35											rs201260783	1	PASS	0.000169231	40	236364	0	18	110328	0	1	2660	0	0	230	0	5	40364	0	5	11406	0	0	25746	0	7	29922	0	1
7:99261670	AG/-	CYP3A5	frameshift_variant	NM_000777.4:c.718_719delCT	NP_000768.1:p.Leu240Valfs*11					18.08											rs748669600	1	PASS	4.23675e-06	1	236030	0	1	110224	0	0	2662	0	0	228	0	0	40076	0	1	11422	0	0	25858	0	0	29978	0	0
7:99261696	TG/-	CYP3A5	frameshift_variant	NM_000777.4:c.692_693delCA	NP_000768.1:p.Pro231Argfs*3					23.8											rs772471367	1	PASS	4.38762e-06	1	227914	0	0	108250	0	0	2650	0	0	224	0	0	39050	0	0	11380	0	0	25644	0	0	29302	0	0
7:99262871	GA/-	CYP3A5	frameshift_variant	NM_000777.4:c.587_588delTC	NP_000768.1:p.Leu196Glnfs*12					25.4											rs1234678621	1	PASS	7.95305e-06	2	251476	0	0	113752	0	0	2668	0	0	242	0	0	42216	0	0	11502	0	0	26132	0	0	30992	0	0
7:99262924	A/-	CYP3A5	frameshift_variant	NM_000777.4:c.535delT	NP_000768.1:p.Tyr179Thrfs*5					34											rs771170846	1	PASS	3.97652e-06	1	251476	0	1	113756	0	0	2668	0	0	242	0	0	42218	0	1	11504	0	0	26134	0	0	30990	0	0
7:99262939	T/C	CYP3A5	splice_acceptor_variant	NM_000777.4:c.522-2A>G		2 of 6 Predicted as Damaging	7.394	1	10.8603	24.7	0.999969	0.922									rs1355793763	1	PASS	3.97674e-06	1	251462	0	0	113750	0	0	2668	0	0	242	0	0	42216	0	0	11502	0	0	26134	0	0	30988	0	0
7:99264235	-/A	CYP3A5	frameshift_variant	NM_000777.4:c.510_511insT	NP_000768.1:p.Thr171Tyrfs*38					21.8											rs765303708	1	PASS	3.97671e-06	1	251464	0	0	113744	0	0	2668	0	0	242	0	0	42212	0	0	11500	0	0	26132	0	0	30990	0	1
7:99264254	G/-	CYP3A5	frameshift_variant	NM_000777.4:c.491delC	NP_000768.1:p.Ala164Glufs*9					23.2											rs774335664	1	PASS	1.19296e-05	3	251476	0	0	113750	0	0	2668	0	0	242	0	0	42216	0	0	11502	0	0	26132	0	0	30990	0	3
7:99264289	A/C	CYP3A5	stop_gained	NM_000777.4:c.456T>G	NP_000768.1:p.Tyr152Ter	2 of 6 Predicted as Damaging	2.142	0.997	7.5226	35											rs561555514	1	PASS	2.38635e-05	6	251430	0	0	113716	0	0	2668	0	0	242	0	0	42190	0	0	11498	0	0	26134	0	0	30984	0	0
7:99264313	C/G	CYP3A5	splice_acceptor_variant	NM_000777.4:c.433-1G>C		2 of 6 Predicted as Damaging	6.607	1	13.3785	29.6	0.999987	0.938									rs373134805	1	PASS	7.55792e-05	19	251392	0	0	113696	0	0	2668	0	0	242	0	0	42176	0	0	11502	0	0	26132	0	0	30976	0	0
7:99264574	C/T	CYP3A5	splice_donor_variant	NM_000777.4:c.432+1G>A		2 of 6 Predicted as Damaging	7.211	1	13.3785	30	0.999987	0.938									rs759812876	1	PASS	3.97921e-06	1	251306	0	0	113676	0	0	2668	0	0	242	0	0	42184	0	0	11496	0	0	26112	0	0	30974	0	0
7:99264574	C/A	CYP3A5	splice_donor_variant	NM_000777.4:c.432+1G>T		2 of 6 Predicted as Damaging	7.211	1	13.3785	29.5	0.999987	0.938									rs759812876	1	PASS	3.18337e-05	8	251306	0	0	113676	0	0	2668	0	0	242	0	0	42184	0	0	11496	0	0	26112	0	0	30974	0	0
7:99264599	G/-	CYP3A5	frameshift_variant	NM_000777.4:c.408delC	NP_000768.1:p.Phe137Serfs*21					24.3											rs767317522	1	PASS	4.77312e-05	12	251408	0	0	113732	0	0	2668	0	0	242	0	0	42208	0	0	11500	0	0	26124	0	0	30990	0	0
7:99264618	C/T	CYP3A5	missense_variant	NM_000777.4:c.389G>A	NP_000768.1:p.Arg130Gln	6 of 6 Predicted as Damaging	7.211	1	13.3785	25.2											rs758037875	1	PASS	1.59093e-05	4	251426	0	0	113732	0	0	2668	0	0	242	0	0	42210	0	0	11500	0	0	26124	0	0	30988	0	0
7:99269409	A/T	CYP3A5	stop_gained	NM_000777.4:c.318+794T>A		0 of 6 Predicted as Damaging	0.026	0.001		4.612											rs1257468120	1	PASS	7.32826e-06	1	136458	0	1	53382	0	0	948	0	0	154	0	1	33028	0	0	1524	0	0	1606	0	0	16122	0	0
7:99269411	A/-	CYP3A5	frameshift_variant	NM_000777.4:c.318+792delT						4.558											rs1563000763	1	PASS	7.33095e-06	1	136408	0	1	53366	0	0	948	0	0	154	0	1	33006	0	0	1522	0	0	1606	0	0	16130	0	0
7:99269425	G/C	CYP3A5	stop_gained	NM_000777.4:c.318+778C>G		0 of 6 Predicted as Damaging	-0.411			1.847											rs559561358	1	PASS	0.000146175	20	136822	1	0	53522	0	0	950	0	0	154	0	0	33102	0	0	1532	0	0	1606	0	0	16178	0	0
7:99270202	C/T	CYP3A5	splice_donor_variant	NM_000777.4:c.318+1G>A		2 of 6 Predicted as Damaging	6.362	1	12.5544	22.9	0.999989	0.758									rs747171434	1	PASS	3.9801e-06	1	251250	0	1	113616	0	0	2668	0	0	242	0	0	42130	0	0	11488	0	0	26134	0	1	30954	0	0
7:99270207	C/-	CYP3A5	frameshift_variant	NM_000777.4:c.314delG	NP_000768.1:p.Arg105Glnfs*4					23.4											rs766144904	1	PASS	3.97896e-06	1	251322	0	1	113644	0	0	2668	0	0	242	0	0	42152	0	0	11492	0	1	26134	0	0	30956	0	0
7:99270208	G/A	CYP3A5	stop_gained	NM_000777.4:c.313C>T	NP_000768.1:p.Arg105Ter	2 of 6 Predicted as Damaging	0.6	0.868	8.459	34											rs776567184	1	PASS	1.19373e-05	3	251314	0	0	113636	0	0	2668	0	0	242	0	0	42152	0	0	11490	0	0	26132	0	0	30952	0	0
7:99270232	C/A	CYP3A5	stop_gained	NM_000777.4:c.289G>T	NP_000768.1:p.Glu97Ter	2 of 6 Predicted as Damaging	4.713	1	12.5544	36											rs763263522	1	PASS	3.97791e-06	1	251388	0	0	113672	0	0	2668	0	0	242	0	0	42174	0	0	11494	0	0	26134	0	0	30960	0	1
7:99272155	C/A	CYP3A5	splice_donor_variant	NM_000777.4:c.218+1G>T		2 of 6 Predicted as Damaging	6.26	1	12.7937	24.3	0.999963	0.842									rs1382315230	1	PASS	3.98311e-06	1	251060	0	0	113618	0	0	2668	0	0	242	0	0	42140	0	0	11494	0	0	26124	0	0	30950	0	0
7:99272157	C/A	CYP3A5	stop_gained	NM_000777.4:c.217G>T	NP_000768.1:p.Gly73Ter	2 of 6 Predicted as Damaging	3.568	1	8.6272	27.1	7.26006e-05	0.108									rs781230602	1	PASS	3.98273e-06	1	251084	0	0	113624	0	0	2668	0	0	242	0	0	42142	0	0	11494	0	0	26130	0	0	30948	0	0
7:99272159	C/T	CYP3A5	stop_gained	NM_000777.4:c.215G>A	NP_000768.1:p.Trp72Ter	2 of 6 Predicted as Damaging	6.26	1	12.7937	35											rs1172946988	1	PASS	7.96318e-06	2	251156	0	0	113648	0	0	2668	0	0	242	0	0	42158	0	0	11496	0	0	26130	0	0	30954	0	0
7:99272188	TG/-	CYP3A5	frameshift_variant	NM_000777.4:c.185_186delCA	NP_000768.1:p.Thr62Argfs*4					15.23											rs1442558737	1	PASS	3.98241e-06	1	251104	0	1	113582	0	0	2668	0	0	240	0	0	42130	0	0	11492	0	0	26130	0	1	30922	0	0
7:99273740	G/A	CYP3A5	stop_gained	NM_000777.4:c.163C>T	NP_000768.1:p.Gln55Ter	1 of 6 Predicted as Damaging	0.266	0.038	4.5415	24.8	0.00334691	0.196									rs1213117276	1	PASS	3.98057e-06	1	251220	0	1	113558	0	0	2668	0	0	242	0	0	42108	0	0	11492	0	0	26122	0	1	30926	0	0
7:99273804	AA/-	CYP3A5	stop_gained	NM_000777.4:c.98_99delTT	NP_000768.1:p.Phe33Terfs					22.9											rs1407515047	1	PASS	3.97871e-06	1	251338	0	1	113666	0	0	2668	0	0	240	0	0	42178	0	0	11494	0	0	26122	0	1	30964	0	0
7:99273825	C/-	CYP3A5	frameshift_variant	NM_000777.4:c.78delG	NP_000768.1:p.Thr27Profs*63					0.686											rs1252656182	1	PASS	3.97924e-06	1	251304	0	1	113648	0	0	2668	0	0	240	0	0	42166	0	0	11500	0	0	26126	0	1	30948	0	0
7:99274201	T/C	CYP3A5	splice_acceptor_variant	NM_000777.4:c.72-370A>G		0 of 6 Predicted as Damaging	-0.665		5.1547	2.794	2.08326e-05	0.002									rs1324019660	1	PASS	4.35992e-06	1	229362	0	1	105792	0	0	1964	0	0	178	0	0	38352	0	0	11012	0	0	25744	0	1	28542	0	0
7:99277448	C/T	CYP3A5	splice_donor_variant	NM_000777.4:c.71+1G>A		1 of 6 Predicted as Damaging	2.723	0.992	8.8574	25.8	0.999996	0.934									rs1278659430	1	PASS	3.9776e-06	1	251408	0	0	113692	0	0	2668	0	0	242	0	0	42168	0	0	11492	0	0	26134	0	0	30988	0	0
7:99277451	A/T	CYP3A5	stop_gained	NM_000777.4:c.69T>A	NP_000768.1:p.Tyr23Ter	1 of 6 Predicted as Damaging	-0.36	0.237	5.7941	35	0.000264553	0.366									rs777442533	1	PASS	3.97757e-06	1	251410	0	1	113696	0	0	2668	0	0	242	0	0	42170	0	0	11494	0	1	26134	0	0	30988	0	0
7:99277485	C/T	CYP3A5	stop_gained	NM_000777.4:c.35G>A	NP_000768.1:p.Trp12Ter	1 of 6 Predicted as Damaging	2.723	0.994	8.8574	35											rs1288443539	1	PASS	3.97668e-06	1	251466	0	0	113744	0	0	2668	0	0	242	0	0	42208	0	0	11498	0	0	26134	0	0	30994	0	1
7:99277498	C/-	CYP3A5	frameshift_variant	NM_000777.4:c.22delG	NP_000768.1:p.Ala8Argfs*82					16.71											rs1276300317	1	PASS	3.97668e-06	1	251466	0	0	113746	0	0	2668	0	0	242	0	0	42210	0	0	11500	0	0	26134	0	0	30992	0	0
7:99277506	G/-	CYP3A5	frameshift_variant	NM_000777.4:c.14delC	NP_000768.1:p.Pro5Glnfs*85					22.6											rs753526701	1	PASS	2.38593e-05	6	251474	0	2	113754	0	0	2668	0	0	242	0	0	42212	0	0	11502	0	2	26134	0	0	30996	0	0
1:97544569	TT/-	DPYD	frameshift_variant	NM_000110.3:c.3040_3041delAA	NP_000101.2:p.Lys1014Glufs*14					43											rs1557849648	1	PASS	3.9814e-06	1	251168	0	0	113482	0	0	2668	0	0	242	0	0	42056	0	0	11492	0	0	26132	0	0	30892	0	0
1:97544576	C/A	DPYD	stop_gained	NM_000110.3:c.3034G>T	NP_000101.2:p.Glu1012Ter	2 of 6 Predicted as Damaging	2.177	1	16.8148	45											rs761584058	1	PASS	1.99033e-05	5	251214	0	0	113536	0	0	2668	0	0	242	0	0	42084	0	0	11496	0	0	26132	0	0	30914	0	0
1:97544579	-/A	DPYD	frameshift_variant	NM_000110.3:c.3031dupT	NP_000101.2:p.Tyr1011Leufs*2					35			Uncertain Significance	(1 Stars) Criteria Provided, Single Submitter							rs1459699844	1	PASS	7.96121e-06	2	251218	0	0	113536	0	0	2668	0	0	242	0	0	42094	0	0	11498	0	0	26130	0	0	30904	0	1
1:97544620	G/A	DPYD	missense_variant	NM_000110.3:c.2990C>T	NP_000101.2:p.Pro997Leu	6 of 6 Predicted as Damaging	9.813	1	19.6731	33											rs1258973993	1	PASS	3.97791e-06	1	251388	0	0	113684	0	0	2668	0	0	242	0	0	42176	0	0	11502	0	0	26132	0	0	30964	0	0
1:97544623	C/A	DPYD	missense_variant	NM_000110.3:c.2987G>T	NP_000101.2:p.Cys996Phe	6 of 6 Predicted as Damaging	7.776	1	19.6731	33											rs672601273	1	PASS	3.97829e-06	1	251364	0	1	113674	0	0	2668	0	0	242	0	0	42176	0	0	11500	0	1	26132	0	0	30956	0	0
1:97544644	C/G	DPYD	missense_variant	NM_000110.3:c.2966G>C	NP_000101.2:p.Cys989Ser	6 of 6 Predicted as Damaging	7.776	1	19.6731	29.4											rs1164024130	1	PASS	7.95678e-06	2	251358	0	2	113680	0	0	2668	0	0	242	0	1	42178	0	0	11492	0	0	26130	0	1	30970	0	0
1:97544674	A/-	DPYD	frameshift_variant	NM_000110.3:c.2936delT	NP_000101.2:p.Leu979Argfs*4					35											rs1231835017	1	PASS	3.97858e-06	1	251346	0	0	113674	0	0	2668	0	0	242	0	0	42172	0	0	11494	0	0	26130	0	0	30968	0	0
1:97544689	T/G	DPYD	missense_variant	NM_000110.3:c.2921A>C	NP_000101.2:p.Asp974Ala	6 of 6 Predicted as Damaging	6.249	1	15.8306	28.5											rs72547602	1	PASS	3.97864e-06	1	251342	0	1	113676	0	0	2668	0	0	242	0	1	42176	0	0	11494	0	0	26132	0	0	30964	0	0
1:97544690	C/A	DPYD	missense_variant	NM_000110.3:c.2920G>T	NP_000101.2:p.Asp974Tyr	6 of 6 Predicted as Damaging	7.776	1	16.6656	26.5											rs757376267	1	PASS	3.97905e-06	1	251316	0	1	113660	0	0	2668	0	0	242	0	0	42170	0	0	11494	0	0	26130	0	1	30956	0	0
1:97547905	C/T	DPYD	missense_variant	NM_000110.3:c.2888G>A	NP_000101.2:p.Cys963Tyr	6 of 6 Predicted as Damaging	7.625	1	20.0954	33											rs776289153	1	PASS	3.98061e-06	1	251218	0	0	113546	0	0	2670	0	0	242	0	0	42088	0	0	11486	0	0	26130	0	0	30930	0	1
1:97547908	G/A	DPYD	missense_variant	NM_000110.3:c.2885C>T	NP_000101.2:p.Thr962Ile	6 of 6 Predicted as Damaging	9.624	1	20.0954	29.6											rs765247038	1	PASS	3.98038e-06	1	251232	0	1	113566	0	0	2670	0	0	242	0	0	42100	0	0	11490	0	1	26130	0	0	30934	0	0
1:97547923	C/T	DPYD	missense_variant	NM_000110.3:c.2870G>A	NP_000101.2:p.Gly957Asp	6 of 6 Predicted as Damaging	7.625	1	20.0954	32											rs1373058882	1	PASS	3.98004e-06	1	251254	0	0	113570	0	0	2670	0	0	242	0	0	42094	0	0	11490	0	0	26134	0	0	30940	0	0
1:97547956	G/A	DPYD	missense_variant	NM_000110.3:c.2837C>T	NP_000101.2:p.Ala946Val	6 of 6 Predicted as Damaging	9.624	1	20.0954	27											rs753950237	1	PASS	3.98045e-06	1	251228	0	0	113558	0	0	2668	0	0	242	0	0	42112	0	0	11486	0	0	26126	0	0	30924	0	0
1:97547987	C/A	DPYD	missense_variant	NM_000110.3:c.2806G>T	NP_000101.2:p.Gly936Cys	6 of 6 Predicted as Damaging	4.042	1	10.9864	23.9											rs137878450	1	PASS	1.19441e-05	3	251170	0	3	113526	0	0	2670	0	0	242	0	3	42088	0	0	11488	0	0	26126	0	0	30912	0	0
1:97548016	C/T	DPYD	missense_variant	NM_000110.3:c.2777G>A	NP_000101.2:p.Gly926Glu	6 of 6 Predicted as Damaging	3.63	1	20.0954	25.3											rs1462320422	1	PASS	7.96768e-06	2	251014	0	2	113438	0	0	2670	0	0	242	0	2	42052	0	0	11476	0	0	26126	0	0	30872	0	0
1:97564044	C/T	DPYD	splice_donor_variant	NM_000110.3:c.2766+1G>A		2 of 6 Predicted as Damaging	5.334	1	18.2848	32	0.99998	0.936									rs1355754530	1	PASS	1.19533e-05	3	250976	0	2	113454	0	0	2668	0	0	240	0	1	42070	0	0	11476	0	0	26120	0	1	30880	0	0
1:97564049	A/T	DPYD	missense_variant	NM_000110.3:c.2762T>A	NP_000101.2:p.Ile921Asn	6 of 6 Predicted as Damaging	6.365	1	14.7536	25.5											rs771930534	1	PASS	1.59344e-05	4	251030	0	4	113484	0	0	2668	0	0	240	0	2	42090	0	0	11480	0	0	26124	0	2	30882	0	0
1:97564063	C/-	DPYD	frameshift_variant	NM_000110.3:c.2748delG	NP_000101.2:p.Arg916Serfs*9					34			Likely Pathogenic	(1 Stars) Criteria Provided, Single Submitter							rs1057517230	1	PASS	3.98311e-06	1	251060	0	0	113508	0	0	2668	0	0	240	0	0	42094	0	0	11480	0	0	26126	0	0	30900	0	0
1:97564065	T/-	DPYD	frameshift_variant	NM_000110.3:c.2746delA	NP_000101.2:p.Arg916Glyfs*9					24.3											rs778614771	1	PASS	1.19489e-05	3	251070	0	0	113506	0	0	2668	0	0	240	0	0	42090	0	0	11484	0	0	26124	0	0	30900	0	0
1:97564158	G/A	DPYD	stop_gained	NM_000110.3:c.2653C>T	NP_000101.2:p.Gln885Ter	2 of 6 Predicted as Damaging	2.361	0.983	10.4973	37											rs771839581	1	PASS	3.99543e-06	1	250286	0	1	112928	0	0	2668	0	0	240	0	0	41816	0	0	11432	0	0	26072	0	1	30700	0	0
1:97564166	T/C	DPYD	missense_variant	NM_000110.3:c.2645A>G	NP_000101.2:p.Tyr882Cys	6 of 6 Predicted as Damaging	2.934	1	10.1142	25.5											rs759766897	1	PASS	3.99562e-06	1	250274	0	0	112916	0	0	2668	0	0	240	0	0	41802	0	0	11434	0	0	26066	0	0	30706	0	0
1:97564189	C/T	DPYD	splice_acceptor_variant	NM_000110.3:c.2623-1G>A		2 of 6 Predicted as Damaging	5.362	1	18.2848	34	0.999989	0.934									rs752102711	1	PASS	4.00122e-06	1	249924	0	0	112674	0	0	2666	0	0	236	0	0	41722	0	0	11418	0	0	26024	0	0	30608	0	1
1:97658654	C/A	DPYD	missense_variant	NM_000110.3:c.2593G>T	NP_000101.2:p.Val865Phe	6 of 6 Predicted as Damaging	2.51	0.995	12.679	24.8											rs773815814	1	PASS	3.98213e-06	1	251122	0	1	113498	0	0	2668	0	0	242	0	0	42074	0	1	11484	0	0	26120	0	0	30910	0	0
1:97658663	C/G	DPYD	missense_variant	NM_000110.3:c.2584G>C	NP_000101.2:p.Gly862Arg	6 of 6 Predicted as Damaging	6.728	1	20.4192	32											rs753419296	1	PASS	3.98222e-06	1	251116	0	0	113494	0	0	2668	0	0	242	0	0	42074	0	0	11484	0	0	26112	0	0	30914	0	0
1:97658668	T/C	DPYD	missense_variant	NM_000110.3:c.2579A>G	NP_000101.2:p.Gln860Arg	6 of 6 Predicted as Damaging	6.916	1	16.4447	28.6											rs1337814933	1	PASS	1.19455e-05	3	251140	0	2	113516	0	0	2668	0	0	242	0	1	42088	0	0	11486	0	0	26114	0	1	30918	0	0
1:97658668	T/-	DPYD	frameshift_variant	NM_000110.3:c.2579delA	NP_000101.2:p.Gln860Argfs*9					35			Likely Pathogenic	(1 Stars) Criteria Provided, Single Submitter							rs746991079	1	PASS	3.584e-05	9	251116	0	9	113494	0	0	2668	0	0	242	0	5	42072	0	1	11484	0	1	26116	0	2	30912	0	0
1:97658698	T/C	DPYD	missense_variant	NM_000110.3:c.2549A>G	NP_000101.2:p.Asp850Gly	6 of 6 Predicted as Damaging	6.916	1	16.4447	28.4											rs765075551	1	PASS	7.96514e-06	2	251094	0	1	113490	0	0	2668	0	0	242	0	1	42080	0	0	11482	0	0	26116	0	0	30902	0	0
1:97658735	G/A	DPYD	missense_variant	NM_000110.3:c.2512C>T	NP_000101.2:p.Leu838Phe	6 of 6 Predicted as Damaging	6.629	1	20.4192	28.4											rs1292887398	1	PASS	1.19564e-05	3	250912	0	3	113372	0	0	2668	0	0	242	0	1	42038	0	0	11478	0	0	26092	0	2	30854	0	0
1:97658758	T/C	DPYD	missense_variant	NM_000110.3:c.2489A>G	NP_000101.2:p.Tyr830Cys	6 of 6 Predicted as Damaging	5.234	1	16.4447	32											rs761302217	1	PASS	3.98902e-06	1	250688	0	1	113286	0	0	2668	0	0	242	0	0	42008	0	0	11462	0	0	26064	0	1	30842	0	0
1:97658762	C/T	DPYD	missense_variant	NM_000110.3:c.2485G>A	NP_000101.2:p.Asp829Asn	6 of 6 Predicted as Damaging	6.728	1	20.4192	33											rs199777072	1	PASS	0.000474724	119	250672	2	0	113250	0	0	2668	0	0	242	0	0	41996	0	0	11458	0	0	26056	0	0	30830	0	1
1:97658765	C/A	DPYD	stop_gained	NM_000110.3:c.2482G>T	NP_000101.2:p.Glu828Ter	2 of 6 Predicted as Damaging	1.23	0.991	7.9337	38											rs200687447	1	PASS	3.9902e-06	1	250614	0	1	113238	0	0	2668	0	0	242	0	1	42000	0	0	11462	0	0	26046	0	0	30820	0	0
1:97658797	C/T	DPYD	missense_variant	NM_000110.3:c.2450G>A	NP_000101.2:p.Ser817Asn	6 of 6 Predicted as Damaging	6.728	1	20.4192	29.6											rs757227327	1	PASS	4.00413e-06	1	249742	0	1	112802	0	0	2658	0	0	242	0	0	41914	0	1	11354	0	0	25920	0	0	30714	0	0
1:97700439	T/G	DPYD	missense_variant	NM_000110.3:c.2411A>C	NP_000101.2:p.Gln804Pro	6 of 6 Predicted as Damaging	7.698	1	16.0487	27.3											rs761609256	1	PASS	2.79071e-05	7	250832	0	1	113358	0	0	2668	0	0	242	0	0	42028	0	0	11478	0	0	26094	0	1	30848	0	0
1:97700484	G/A	DPYD	missense_variant	NM_000110.3:c.2366C>T	NP_000101.2:p.Pro789Leu	6 of 6 Predicted as Damaging	9.476	1	19.9382	32											rs1175372618	1	PASS	3.98359e-06	1	251030	0	1	113440	0	0	2666	0	0	242	0	0	42042	0	0	11480	0	0	26122	0	1	30888	0	0
1:97700521	C/T	DPYD	missense_variant	NM_000110.3:c.2329G>A	NP_000101.2:p.Ala777Thr	6 of 6 Predicted as Damaging	7.487	1	19.9187	31											rs672601276	1	PASS	3.9826e-06	1	251092	0	0	113488	0	0	2668	0	0	242	0	0	42068	0	0	11494	0	0	26124	0	0	30892	0	0
1:97700526	A/C	DPYD	missense_variant	NM_000110.3:c.2324T>G	NP_000101.2:p.Leu775Trp	6 of 6 Predicted as Damaging	8.962	1	16.0325	31											rs200643089	1	PASS	3.18568e-05	8	251124	0	1	113498	0	0	2668	0	0	242	0	0	42072	0	1	11494	0	0	26124	0	0	30898	0	0
1:97700530	C/T	DPYD	missense_variant	NM_000110.3:c.2320G>A	NP_000101.2:p.Ala774Thr	6 of 6 Predicted as Damaging	3.805	1	19.9187	32											rs1304906107	1	PASS	3.98238e-06	1	251106	0	1	113484	0	0	2670	0	0	242	0	1	42068	0	0	11490	0	0	26122	0	0	30892	0	0
1:97700551	C/G	DPYD	splice_acceptor_variant	NM_000110.3:c.2300-1G>C		2 of 6 Predicted as Damaging	7.487	1	19.9187	33	0.999989	0.946									rs984858263	1	PASS	3.98378e-06	1	251018	0	1	113424	0	0	2670	0	0	242	0	1	42022	0	0	11486	0	0	26124	0	0	30880	0	0
1:97770823	C/T	DPYD	missense_variant	NM_000110.3:c.2291G>A	NP_000101.2:p.Gly764Glu	6 of 6 Predicted as Damaging	7.442	1	19.8696	31											rs980732943	1	PASS	3.98819e-06	1	250740	0	1	113242	0	0	2668	0	0	242	0	0	41928	0	0	11456	0	0	26122	0	1	30826	0	0
1:97770853	A/G	DPYD	missense_variant	NM_000110.3:c.2261T>C	NP_000101.2:p.Val754Ala	6 of 6 Predicted as Damaging	8.905	1	15.9906	27											rs1475755819	1	PASS	7.97327e-06	2	250838	0	0	113304	0	0	2668	0	0	242	0	0	41944	0	0	11476	0	0	26128	0	0	30846	0	0
1:97770904	G/A	DPYD	missense_variant	NM_000110.3:c.2210C>T	NP_000101.2:p.Thr737Ile	6 of 6 Predicted as Damaging	9.416	1	19.8696	28.1											rs570122671	1	PASS	4.38443e-05	11	250888	0	0	113374	0	0	2668	0	0	242	0	0	41996	0	0	11476	0	0	26120	0	0	30872	0	0
1:97770905	T/-	DPYD	frameshift_variant	NM_000110.3:c.2209delA	NP_000101.2:p.Thr737Leufs*5					35											rs1558014211	1	PASS	7.97168e-06	2	250888	0	2	113374	0	0	2668	0	0	242	0	2	41996	0	0	11476	0	0	26120	0	0	30872	0	0
1:97770918	-/AA	DPYD	frameshift_variant	NM_000110.3:c.2195_2196dupTT	NP_000101.2:p.Thr733Leufs*10					35												1	PASS	3.98549e-06	1	250910	0	0	113390	0	0	2668	0	0	242	0	0	42004	0	0	11472	0	0	26122	0	0	30882	0	0
1:97771771	A/G	DPYD	missense_variant	NM_000110.3:c.2141T>C	NP_000101.2:p.Val714Ala	6 of 6 Predicted as Damaging	8.925	1	16.6512	27.9											rs569661196	1	PASS	4.38852e-05	11	250654	0	0	113100	0	0	2668	0	0	242	0	0	41830	0	0	11454	0	0	26124	0	0	30782	0	0
1:97771773	A/T	DPYD	missense_variant	NM_000110.3:c.2139T>A	NP_000101.2:p.Asn713Lys	6 of 6 Predicted as Damaging	4.153	1	11.2268	23.4											rs768507975	1	PASS	2.39368e-05	6	250660	0	6	113102	0	0	2668	0	0	242	0	0	41834	0	0	11450	0	6	26124	0	0	30784	0	0
1:97771775	T/C	DPYD	missense_variant	NM_000110.3:c.2137A>G	NP_000101.2:p.Asn713Asp	6 of 6 Predicted as Damaging	7.668	1	16.6512	27.7											rs773407491	1	PASS	7.97868e-06	2	250668	0	2	113102	0	0	2668	0	0	242	0	1	41832	0	0	11450	0	1	26126	0	0	30784	0	0
1:97771800	-/A	DPYD	frameshift_variant	NM_000110.3:c.2112dupT	NP_000101.2:p.Pro705Serfs*12					35											rs770063428	1	PASS	3.98858e-06	1	250716	0	0	113158	0	0	2666	0	0	240	0	0	41862	0	0	11462	0	0	26122	0	0	30806	0	0
1:97771821	C/T	DPYD	stop_gained	NM_000110.3:c.2091G>A	NP_000101.2:p.Trp697Ter	2 of 6 Predicted as Damaging	7.458	1	20.6721	47											rs753296078	1	PASS	7.97836e-06	2	250678	0	2	113118	0	0	2668	0	0	240	0	1	41860	0	0	11462	0	0	26120	0	1	30768	0	0
1:97771823	A/-	DPYD	frameshift_variant	NM_000110.3:c.2089delT	NP_000101.2:p.Trp697Glyfs*14					35											rs1388639783	1	PASS	3.98924e-06	1	250674	0	0	113122	0	0	2668	0	0	240	0	0	41862	0	0	11460	0	0	26120	0	0	30772	0	0
1:97771838	G/A	DPYD	missense_variant	NM_000110.3:c.2074C>T	NP_000101.2:p.Arg692Trp	6 of 6 Predicted as Damaging	4.268	1	14.5008	25.1											rs538703919	1	PASS	1.59605e-05	4	250618	0	0	113100	0	0	2668	0	0	240	0	0	41842	0	0	11462	0	0	26122	0	0	30766	0	3
1:97771853	C/-	DPYD	frameshift_variant	NM_000110.3:c.2059delG	NP_000101.2:p.Asp687Ilefs*24					35											rs1558015372	1	PASS	3.99135e-06	1	250542	0	0	113048	0	0	2668	0	0	240	0	0	41810	0	0	11458	0	0	26118	0	0	30754	0	0
1:97839148	C/T	DPYD	missense_variant	NM_000110.3:c.2027G>A	NP_000101.2:p.Gly676Glu	6 of 6 Predicted as Damaging	7.094	1	19.9003	31											rs575853463	1	PASS	3.18804e-05	8	250938	0	0	113328	0	0	2670	0	0	242	0	0	41974	0	0	11474	0	0	26118	0	0	30850	0	0
1:97839149	C/T	DPYD	missense_variant	NM_000110.3:c.2026G>A	NP_000101.2:p.Gly676Arg	6 of 6 Predicted as Damaging	7.094	1	19.9003	32											rs1381816413	1	PASS	3.98476e-06	1	250956	0	0	113344	0	0	2670	0	0	242	0	0	41986	0	0	11476	0	0	26116	0	0	30854	0	0
1:97839152	T/C	DPYD	missense_variant	NM_000110.3:c.2023A>G	NP_000101.2:p.Met675Val	6 of 6 Predicted as Damaging	7.293	1	16.0142	26.1											rs763506271	1	PASS	1.9924e-05	5	250954	0	5	113342	0	0	2670	0	0	242	0	3	41982	0	0	11482	0	0	26112	0	2	30854	0	0
1:97839156	A/T	DPYD	missense_variant	NM_000110.3:c.2019T>A	NP_000101.2:p.His673Gln	6 of 6 Predicted as Damaging	0.62	0.996	7.8846	22.9											rs1312675856	1	PASS	3.98448e-06	1	250974	0	0	113350	0	0	2670	0	0	242	0	0	41990	0	0	11474	0	0	26114	0	0	30860	0	0
1:97839157	T/C	DPYD	missense_variant	NM_000110.3:c.2018A>G	NP_000101.2:p.His673Arg	6 of 6 Predicted as Damaging	7.293	1	16.0142	26.4											rs1376957493	1	PASS	3.98448e-06	1	250974	0	0	113350	0	0	2670	0	0	242	0	0	41990	0	0	11474	0	0	26114	0	0	30860	0	0
1:97839160	G/C	DPYD	missense_variant	NM_000110.3:c.2015C>G	NP_000101.2:p.Pro672Arg	6 of 6 Predicted as Damaging	8.966	1	19.9003	29.2											rs763784786	1	PASS	3.98486e-06	1	250950	0	1	113336	0	0	2670	0	0	242	0	0	41970	0	1	11476	0	0	26114	0	0	30864	0	0
1:97839175	A/G	DPYD	missense_variant	NM_000110.3:c.2000T>C	NP_000101.2:p.Leu667Ser	6 of 6 Predicted as Damaging	8.482	1	16.0142	29.8											rs1283428845	1	PASS	3.984e-06	1	251004	0	1	113404	0	0	2670	0	0	242	0	0	42008	0	0	11482	0	0	26112	0	1	30890	0	0
1:97839184	G/A	DPYD	missense_variant	NM_000110.3:c.1991C>T	NP_000101.2:p.Ala664Val	6 of 6 Predicted as Damaging	8.966	1	19.9003	33											rs749982106	1	PASS	3.98454e-06	1	250970	0	0	113390	0	0	2668	0	0	242	0	0	42006	0	0	11480	0	0	26112	0	0	30882	0	0
1:97839192	TCCAGAA/-	DPYD	frameshift_variant	NM_000110.3:c.1977_1983delTTCTGGA	NP_000101.2:p.Asp659Glufs*7					35											rs1440380546	1	PASS	1.1955e-05	3	250940	0	0	113376	0	0	2668	0	0	242	0	0	42006	0	0	11476	0	0	26108	0	0	30876	0	0
1:97839202	T/C	DPYD	splice_acceptor_variant	NM_000110.3:c.1975-2A>G		2 of 6 Predicted as Damaging	7.293	1	15.5863	33	0.999988	0.928									rs1180661405	1	PASS	3.98645e-06	1	250850	0	0	113356	0	0	2668	0	0	242	0	0	42004	0	0	11470	0	0	26102	0	0	30870	0	0
1:97847948	C/T	DPYD	splice_donor_variant	NM_000110.3:c.1974+1G>A		2 of 6 Predicted as Damaging	6.686	1	19.6689	34	0.999986	0.94	Uncertain Significance	(1 Stars) Criteria Provided, Single Submitter							rs772254904	1	PASS	4.07395e-06	1	245462	0	1	111382	0	0	2648	0	0	238	0	0	41160	0	0	11380	0	0	25524	0	1	30432	0	0
1:97847973	C/G	DPYD	missense_variant	NM_000110.3:c.1950G>C	NP_000101.2:p.Trp650Cys	6 of 6 Predicted as Damaging	6.686	1	19.6689	31											rs753527420	1	PASS	4.05331e-06	1	246712	0	0	112032	0	0	2660	0	0	238	0	0	41282	0	0	11450	0	0	25834	0	0	30568	0	0
1:97915613	A/C	DPYD	splice_donor_variant	NM_000110.3:c.1905+2T>G		2 of 6 Predicted as Damaging	8.962	1	15.2709	30	0.999978	0.938									rs1287066194	1	PASS	3.97981e-06	1	251268	0	0	113632	0	0	2668	0	0	242	0	0	42148	0	0	11492	0	0	26128	0	0	30954	0	1
1:97915657	C/T	DPYD	stop_gained	NM_000110.3:c.1863G>A	NP_000101.2:p.Trp621Ter	2 of 6 Predicted as Damaging	7.487	1	18.9863	45			Likely Pathogenic	(1 Stars) Criteria Provided, Single Submitter	DM?	"Schizophrenia"					rs1057516388	1	PASS	1.19362e-05	3	251336	0	1	113672	0	0	2668	0	0	242	0	0	42170	0	0	11498	0	0	26130	0	1	30964	0	0
1:97915661	T/C	DPYD	missense_variant	NM_000110.3:c.1859A>G	NP_000101.2:p.Tyr620Cys	6 of 6 Predicted as Damaging	7.698	1	15.2709	27.5											rs748235192	1	PASS	3.97861e-06	1	251344	0	0	113686	0	0	2668	0	0	242	0	0	42186	0	0	11500	0	0	26130	0	0	30960	0	0
1:97915674	T/G	DPYD	missense_variant	NM_000110.3:c.1846A>C	NP_000101.2:p.Lys616Gln	6 of 6 Predicted as Damaging	7.698	1	15.2709	26.6											rs368146607	1	PASS	3.18307e-05	8	251330	0	7	113672	0	0	2668	0	0	242	0	4	42178	0	0	11500	0	2	26128	0	1	30956	0	0
1:97915679	C/T	DPYD	missense_variant	NM_000110.3:c.1841G>A	NP_000101.2:p.Ser614Asn	6 of 6 Predicted as Damaging	7.487	1	18.9863	26.8											rs1245407981	1	PASS	3.97902e-06	1	251318	0	1	113660	0	0	2668	0	0	242	0	0	42168	0	0	11500	0	0	26126	0	1	30956	0	0
1:97915694	T/G	DPYD	missense_variant	NM_000110.3:c.1826A>C	NP_000101.2:p.Asn609Thr	6 of 6 Predicted as Damaging	7.698	1	15.2709	26.3											rs763572567	1	PASS	3.97934e-06	1	251298	0	1	113652	0	0	2668	0	0	242	0	0	42160	0	1	11496	0	0	26130	0	0	30956	0	0
1:97915699	AA/-	DPYD	frameshift_variant	NM_000110.3:c.1820_1821delTT	NP_000101.2:p.Phe607Serfs*4					35											rs1443384944	1	PASS	3.97937e-06	1	251296	0	1	113656	0	0	2668	0	0	242	0	1	42164	0	0	11498	0	0	26126	0	0	30958	0	0
1:97915739	G/T	DPYD	missense_variant	NM_000110.3:c.1781C>A	NP_000101.2:p.Thr594Asn	6 of 6 Predicted as Damaging	1.365	1	6.9763	22.8											rs759249769	1	PASS	1.59252e-05	4	251174	0	4	113594	0	1	2668	0	0	242	0	0	42136	0	1	11494	0	2	26122	0	0	30932	0	0
1:97915750	-/GA	DPYD	frameshift_variant	NM_000110.3:c.1769_1770dupTC	NP_000101.2:p.Ile591Serfs*19					34											rs768130933	1	PASS	3.98267e-06	1	251088	0	1	113516	0	0	2668	0	0	242	0	0	42088	0	0	11492	0	0	26108	0	1	30918	0	0
1:97915756	G/-	DPYD	frameshift_variant	NM_000110.3:c.1764delC	NP_000101.2:p.Arg589Glufs*20					26.2			Uncertain Significance	(1 Stars) Criteria Provided, Single Submitter							rs1346124437	1	PASS	3.9833e-06	1	251048	0	0	113490	0	0	2668	0	0	242	0	0	42068	0	0	11494	0	0	26106	0	0	30912	0	0
1:97915763	A/G	DPYD	missense_variant	NM_000110.3:c.1757T>C	NP_000101.2:p.Val586Ala	6 of 6 Predicted as Damaging	8.962	1	15.6991	27.6											rs374527058	1	PASS	2.39074e-05	6	250968	0	4	113426	0	0	2668	0	0	242	0	1	42046	0	1	11488	0	1	26096	0	1	30886	0	1
1:97915780	C/T	DPYD	splice_acceptor_variant	NM_000110.3:c.1741-1G>A		2 of 6 Predicted as Damaging	7.487	1	19.1224	34	0.999988	0.932									rs770125111	1	PASS	3.98839e-06	1	250728	0	0	113250	0	0	2668	0	0	242	0	0	41942	0	0	11478	0	0	26082	0	0	30838	0	0
1:97981304	G/T	DPYD	missense_variant	NM_000110.3:c.1718C>A	NP_000101.2:p.Thr573Asn	6 of 6 Predicted as Damaging	9.301	1	19.4624	26.4											rs558354142	1	PASS	7.98786e-06	2	250380	0	2	113038	0	0	2666	0	0	236	0	2	41868	0	0	11442	0	0	26062	0	0	30764	0	0
1:97981308	-/G	DPYD	frameshift_variant	NM_000110.3:c.1714dupC	NP_000101.2:p.Leu572Profs*8					35											rs1290522460	1	PASS	7.98563e-06	2	250450	0	0	113070	0	0	2668	0	0	238	0	0	41880	0	0	11442	0	0	26062	0	0	30780	0	0
1:97981318	C/G	DPYD	missense_variant	NM_000110.3:c.1704G>C	NP_000101.2:p.Trp568Cys	6 of 6 Predicted as Damaging	7.356	1	19.4624	33											rs1260757806	1	PASS	3.99125e-06	1	250548	0	0	113136	0	0	2668	0	0	238	0	0	41910	0	0	11452	0	0	26070	0	0	30798	0	0
1:97981330	A/T	DPYD	missense_variant	NM_000110.3:c.1692T>A	NP_000101.2:p.Phe564Leu	6 of 6 Predicted as Damaging	2.192	1	10.8924	26.5											rs759424419	1	PASS	1.59603e-05	4	250622	0	0	113172	0	0	2668	0	0	238	0	0	41912	0	0	11458	0	0	26094	0	0	30802	0	0
1:97981370	G/A	DPYD	missense_variant	NM_000110.3:c.1652C>T	NP_000101.2:p.Ala551Val	6 of 6 Predicted as Damaging	9.301	1	18.7723	29.2											rs1425643142	1	PASS	3.99068e-06	1	250584	0	0	113172	0	0	2668	0	0	242	0	0	41924	0	0	11458	0	0	26076	0	0	30804	0	0
1:97981376	G/C	DPYD	missense_variant	NM_000110.3:c.1646C>G	NP_000101.2:p.Ala549Gly	6 of 6 Predicted as Damaging	9.301	1	18.7723	25.2											rs1440604708	1	PASS	1.19717e-05	3	250592	0	0	113170	0	0	2668	0	0	240	0	0	41928	0	0	11456	0	0	26076	0	0	30802	0	0
1:97981377	C/G	DPYD	missense_variant	NM_000110.3:c.1645G>C	NP_000101.2:p.Ala549Pro	6 of 6 Predicted as Damaging	7.356	1	18.7723	28.3											rs140039091	1	PASS	3.99045e-06	1	250598	0	1	113170	0	0	2668	0	0	240	0	0	41920	0	0	11460	0	0	26080	0	1	30802	0	0
1:97981437	C/G	DPYD	missense_variant	NM_000110.3:c.1585G>C	NP_000101.2:p.Asp529His	6 of 6 Predicted as Damaging	7.356	1	19.0969	24.3											rs1242653737	1	PASS	3.99071e-06	1	250582	0	0	113144	0	0	2668	0	0	238	0	0	41906	0	0	11456	0	0	26082	0	0	30794	0	0
1:97981439	A/T	DPYD	missense_variant	NM_000110.3:c.1583T>A	NP_000101.2:p.Ile528Asn	6 of 6 Predicted as Damaging	8.798	1	15.3563	23.8											rs1458240015	1	PASS	3.99055e-06	1	250592	0	0	113158	0	0	2668	0	0	238	0	0	41912	0	0	11458	0	0	26080	0	0	30802	0	0
1:97981445	G/T	DPYD	missense_variant	NM_000110.3:c.1577C>A	NP_000101.2:p.Thr526Asn	6 of 6 Predicted as Damaging	6.995	1	19.0969	23.4											rs190951787	1	PASS	3.99087e-06	1	250572	0	1	113146	0	0	2668	0	0	238	0	1	41904	0	0	11458	0	0	26078	0	0	30800	0	0
1:97981450	A/C	DPYD	missense_variant	NM_000110.3:c.1572T>G	NP_000101.2:p.Phe524Leu	6 of 6 Predicted as Damaging	2.379	1	10.0572	22.1											rs777368221	1	PASS	7.98021e-06	2	250620	0	0	113172	0	0	2668	0	0	240	0	0	41928	0	0	11462	0	0	26072	0	0	30802	0	0
1:97981457	-/GGTA	DPYD	frameshift_variant	NM_000110.3:c.1562_1565dupTACC	NP_000101.2:p.Leu523Thrfs*8					34											rs1468744935	1	PASS	3.99084e-06	1	250574	0	0	113158	0	0	2668	0	0	238	0	0	41914	0	0	11468	0	0	26070	0	0	30800	0	0
1:97981467	G/A	DPYD	missense_variant	NM_000110.3:c.1555C>T	NP_000101.2:p.Pro519Ser	6 of 6 Predicted as Damaging	7.515	1	19.0969	22.1			Uncertain Significance	(0 Stars) No Assertion Provided,(1 Stars) Criteria Provided, Single Submitter							rs672601282	1	PASS	1.19734e-05	3	250556	0	2	113154	0	0	2668	0	0	238	0	0	41942	0	2	11460	0	0	26058	0	0	30788	0	0
1:97981498	C/A	DPYD	splice_acceptor_variant	NM_000110.3:c.1525-1G>T		2 of 6 Predicted as Damaging	7.137	1	19.0969	27.1	0.999968	0.948									rs766535034	1	PASS	4.00163e-06	1	249898	0	1	112826	0	0	2664	0	0	240	0	1	41868	0	0	11420	0	0	25922	0	0	30712	0	0
1:97981498	C/T	DPYD	splice_acceptor_variant	NM_000110.3:c.1525-1G>A		2 of 6 Predicted as Damaging	7.137	1	19.0969	27.5	0.999969	0.948									rs766535034	1	PASS	3.20131e-05	8	249898	0	8	112826	0	0	2664	0	0	240	0	1	41868	0	0	11420	0	7	25922	0	0	30712	0	0
1:98015115	C/T	DPYD	splice_donor_variant	NM_000110.3:c.1524+1G>A		2 of 6 Predicted as Damaging	7.432	1	20.8598	33	0.99999	0.938	Likely Pathogenic	(1 Stars) Criteria Provided, Single Submitter							rs1057517126	1	PASS	3.9854e-06	1	250916	0	0	113346	0	0	2668	0	0	242	0	0	41974	0	0	11470	0	0	26116	0	0	30876	0	0
1:98015116	C/G	DPYD	missense_variant	NM_000110.3:c.1524G>C	NP_000101.2:p.Gln508His	6 of 6 Predicted as Damaging	5.732	1	20.8598	33	0.999998	0.992									rs775930761	1	PASS	1.19568e-05	3	250904	0	0	113338	0	0	2668	0	0	242	0	0	41972	0	0	11470	0	0	26112	0	0	30874	0	0
1:98015132	A/G	DPYD	missense_variant	NM_000110.3:c.1508T>C	NP_000101.2:p.Ile503Thr	6 of 6 Predicted as Damaging	8.893	1	16.8061	26.8											rs1357636110	1	PASS	1.99184e-05	5	251024	0	0	113426	0	0	2668	0	0	242	0	0	42020	0	0	11476	0	0	26124	0	0	30896	0	0
1:98015138	C/T	DPYD	stop_gained	NM_000110.3:c.1502G>A	NP_000101.2:p.Trp501Ter	2 of 6 Predicted as Damaging	7.432	1	20.8598	47											rs1214305633	1	PASS	3.98406e-06	1	251000	0	1	113404	0	0	2668	0	0	242	0	1	42012	0	0	11474	0	0	26122	0	0	30886	0	0
1:98015165	G/T	DPYD	stop_gained	NM_000110.3:c.1475C>A	NP_000101.2:p.Ser492Ter	2 of 6 Predicted as Damaging	9.403	1	20.8598	47											rs72549304	1	PASS	3.98324e-06	1	251052	0	0	113448	0	0	2668	0	0	242	0	0	42038	0	0	11472	0	0	26118	0	0	30910	0	0
1:98015165	G/C	DPYD	missense_variant	NM_000110.3:c.1475C>G	NP_000101.2:p.Ser492Trp	6 of 6 Predicted as Damaging	9.403	1	20.8598	33											rs72549304	1	PASS	3.98324e-06	1	251052	0	1	113448	0	0	2668	0	0	242	0	0	42038	0	0	11472	0	0	26118	0	1	30910	0	0
1:98015184	C/T	DPYD	missense_variant	NM_000110.3:c.1456G>A	NP_000101.2:p.Ala486Thr	6 of 6 Predicted as Damaging	7.432	1	20.8598	25.7											rs747161261	1	PASS	3.98267e-06	1	251088	0	1	113484	0	0	2668	0	0	242	0	0	42054	0	0	11480	0	1	26126	0	0	30914	0	0
1:98015202	C/T	DPYD	missense_variant	NM_000110.3:c.1438G>A	NP_000101.2:p.Gly480Ser	6 of 6 Predicted as Damaging	7.432	1	20.8598	25.3											rs745911874	1	PASS	2.38907e-05	6	251144	0	2	113536	0	0	2668	0	0	242	0	0	42088	0	0	11482	0	2	26126	0	0	30930	0	0
1:98015227	-/AG	DPYD	frameshift_variant	NM_000110.3:c.1412_1413dupCT	NP_000101.2:p.Ser472Leufs*23					35											rs1557790945	1	PASS	3.98267e-06	1	251088	0	1	113502	0	0	2668	0	0	242	0	0	42082	0	0	11484	0	0	26106	0	1	30920	0	0
1:98015234	A/G	DPYD	missense_variant	NM_000110.3:c.1406T>C	NP_000101.2:p.Met469Thr	6 of 6 Predicted as Damaging	8.893	1	16.8061	26.5											rs763557204	1	PASS	3.9827e-06	1	251086	0	0	113494	0	0	2668	0	0	242	0	0	42072	0	0	11482	0	0	26110	0	0	30920	0	0
1:98015252	TCTGGGAGACCCCA/-	DPYD	frameshift_variant	NM_000110.3:c.1375_1388delTGGGGTCTCCCAGA	NP_000101.2:p.Trp459Serfs*9					35											rs757940841	1	PASS	2.39044e-05	6	251000	0	0	113446	0	0	2668	0	0	242	0	0	42066	0	0	11480	0	0	26092	0	0	30898	0	0
1:98015254	T/-	DPYD	frameshift_variant	NM_000110.3:c.1386delA	NP_000101.2:p.Glu463Lysfs*2					16.45											rs1437370264	1	PASS	3.98454e-06	1	250970	0	1	113424	0	0	2668	0	0	242	0	1	42046	0	0	11480	0	0	26098	0	0	30890	0	0
1:98015261	-/C	DPYD	frameshift_variant	NM_000110.3:c.1379dupG	NP_000101.2:p.Leu461Serfs*12					35			Likely Pathogenic	(1 Stars) Criteria Provided, Single Submitter							rs779948148	1	PASS	3.98546e-06	1	250912	0	1	113394	0	0	2668	0	0	240	0	0	42032	0	0	11476	0	1	26092	0	0	30886	0	0
1:98015301	C/T	DPYD	splice_acceptor_variant	NM_000110.3:c.1340-1G>A		2 of 6 Predicted as Damaging	7.432	1	20.8598	34	0.99999	0.932									rs1435774234	1	PASS	4.01149e-06	1	249284	0	1	112542	0	1	2656	0	0	240	0	0	41860	0	0	11394	0	0	25734	0	0	30658	0	0
1:98039347	A/T	DPYD	missense_variant	NM_000110.3:c.1308T>A	NP_000101.2:p.Ser436Arg	6 of 6 Predicted as Damaging	1.523	1	9.3849	24.1											rs749354734	1	PASS	3.98165e-06	1	251152	0	1	113466	0	0	2668	0	0	240	0	0	42048	0	0	11488	0	1	26132	0	0	30890	0	0
1:98039348	C/T	DPYD	missense_variant	NM_000110.3:c.1307G>A	NP_000101.2:p.Ser436Asn	6 of 6 Predicted as Damaging	7.432	1	17.8525	24.7											rs370569731	1	PASS	7.96337e-06	2	251150	0	1	113468	0	0	2668	0	0	240	0	1	42054	0	0	11486	0	0	26132	0	0	30888	0	0
1:98039354	A/-	DPYD	frameshift_variant	NM_000110.3:c.1301delT	NP_000101.2:p.Val434Alafs*9					35											rs754978663	1	PASS	7.96267e-06	2	251172	0	2	113486	0	0	2668	0	0	240	0	0	42066	0	0	11492	0	2	26132	0	0	30888	0	0
1:98039407	A/-	DPYD	frameshift_variant	NM_000110.3:c.1248delT	NP_000101.2:p.Gly417Glufs*13					24.5											rs1240838072	1	PASS	3.98013e-06	1	251248	0	0	113576	0	0	2668	0	0	242	0	0	42124	0	0	11492	0	0	26130	0	0	30920	0	0
1:98039412	C/A	DPYD	stop_gained	NM_000110.3:c.1243G>T	NP_000101.2:p.Glu415Ter	2 of 6 Predicted as Damaging	2.849	1	9.6804	40			Likely Pathogenic	(1 Stars) Criteria Provided, Single Submitter							rs755031341	1	PASS	3.98092e-06	1	251198	0	0	113542	0	0	2668	0	0	242	0	0	42124	0	0	11484	0	0	26128	0	0	30896	0	0
1:98039426	C/T	DPYD	missense_variant	NM_000110.3:c.1229G>A	NP_000101.2:p.Arg410Gln	6 of 6 Predicted as Damaging	7.432	1	17.8525	29.6											rs199646142	1	PASS	0.000179211	45	251100	0	17	113466	0	0	2668	0	0	242	0	5	42072	0	5	11472	0	0	26120	0	7	30892	0	1
1:98039427	G/A	DPYD	missense_variant	NM_000110.3:c.1228C>T	NP_000101.2:p.Arg410Trp	6 of 6 Predicted as Damaging	9.402	1	17.8525	33											rs528430685	1	PASS	3.1869e-05	8	251028	0	0	113444	0	0	2668	0	0	242	0	0	42054	0	0	11476	0	0	26110	0	0	30894	0	0
1:98039451	T/-	DPYD	frameshift_variant	NM_000110.3:c.1204delA	NP_000101.2:p.Arg402Glufs*28					32											rs781098341	1	PASS	3.98226e-06	1	251114	0	1	113504	0	0	2668	0	0	242	0	0	42104	0	1	11476	0	0	26114	0	0	30900	0	0
1:98039483	A/G	DPYD	missense_variant	NM_000110.3:c.1172T>C	NP_000101.2:p.Leu391Pro	6 of 6 Predicted as Damaging	8.893	1	14.3946	28.9											rs1325769046	1	PASS	3.9846e-06	1	250966	0	0	113368	0	0	2668	0	0	242	0	0	42032	0	0	11462	0	0	26106	0	0	30858	0	0
1:98039486	A/G	DPYD	missense_variant	NM_000110.3:c.1169T>C	NP_000101.2:p.Phe390Ser	6 of 6 Predicted as Damaging	8.893	1	14.3946	31											rs754028972	1	PASS	3.98454e-06	1	250970	0	0	113390	0	0	2668	0	0	242	0	0	42044	0	0	11470	0	0	26104	0	0	30862	0	0
1:98039499	CA/-	DPYD	stop_gained	NM_000110.3:c.1155_1156delTG	NP_000101.2:p.Cys385Terfs					35											rs769925158	1	PASS	2.79085e-05	7	250820	0	0	113294	0	0	2668	0	0	242	0	0	42002	0	0	11456	0	0	26090	0	0	30836	0	0
1:98039516	G/C	DPYD	missense_variant	NM_000110.3:c.1139C>G	NP_000101.2:p.Ala380Gly	6 of 6 Predicted as Damaging	9.402	1	17.1117	24.7											rs1354585423	1	PASS	1.19772e-05	3	250476	0	2	113050	0	0	2666	0	0	240	0	0	41902	0	1	11428	0	0	26066	0	1	30748	0	0
1:98058782	G/A	DPYD	missense_variant	NM_000110.3:c.1120C>T	NP_000101.2:p.Pro374Ser	6 of 6 Predicted as Damaging	9.185	1	19.0599	27.8											rs201785202	1	PASS	2.78596e-05	7	251260	1	0	113654	0	0	2670	0	0	242	0	0	42160	0	0	11498	0	0	26132	0	0	30952	0	0
1:98058793	A/G	DPYD	missense_variant	NM_000110.3:c.1109T>C	NP_000101.2:p.Ile370Thr	6 of 6 Predicted as Damaging	8.687	1	15.3933	29.1											rs760570391	1	PASS	3.97814e-06	1	251374	0	0	113690	0	0	2670	0	0	240	0	0	42178	0	0	11500	0	0	26132	0	0	30970	0	0
1:98058805	C/A	DPYD	missense_variant	NM_000110.3:c.1097G>T	NP_000101.2:p.Gly366Val	6 of 6 Predicted as Damaging	7.259	1	19.0599	28.9											rs752985272	1	PASS	3.97782e-06	1	251394	0	1	113706	0	0	2670	0	0	240	0	0	42188	0	1	11502	0	0	26132	0	0	30974	0	0
1:98058807	T/-	DPYD	frameshift_variant	NM_000110.3:c.1095delA	NP_000101.2:p.Gly366Alafs*5					34											rs1184321568	1	PASS	3.97766e-06	1	251404	0	0	113708	0	0	2670	0	0	242	0	0	42190	0	0	11502	0	0	26132	0	0	30972	0	0
1:98058810	T/G	DPYD	missense_variant	NM_000110.3:c.1092A>C	NP_000101.2:p.Arg364Ser	6 of 6 Predicted as Damaging	1.837	1	10.5914	25.7											rs763008163	1	PASS	7.95507e-06	2	251412	0	0	113712	0	0	2670	0	0	242	0	0	42192	0	0	11502	0	0	26132	0	0	30974	0	2
1:98058820	A/T	DPYD	missense_variant	NM_000110.3:c.1082T>A	NP_000101.2:p.Ile361Asn	6 of 6 Predicted as Damaging	8.687	1	15.3933	24.8											rs1423702166	1	PASS	3.97741e-06	1	251420	0	1	113724	0	0	2670	0	0	242	0	1	42192	0	0	11504	0	0	26134	0	0	30982	0	0
1:98058826	A/T	DPYD	missense_variant	NM_000110.3:c.1076T>A	NP_000101.2:p.Val359Glu	6 of 6 Predicted as Damaging	8.687	1	15.3933	29.2											rs750721736	1	PASS	3.97725e-06	1	251430	0	0	113732	0	0	2670	0	0	242	0	0	42204	0	0	11502	0	0	26134	0	0	30980	0	0
1:98058829	CG/-	DPYD	frameshift_variant	NM_000110.3:c.1072_1073delCG	NP_000101.2:p.Arg358Cysfs*11					35											rs1428534767	1	PASS	3.97741e-06	1	251420	0	0	113722	0	0	2670	0	0	240	0	0	42198	0	0	11504	0	0	26134	0	0	30976	0	0
1:98058829	C/T	DPYD	missense_variant	NM_000110.3:c.1073G>A	NP_000101.2:p.Arg358His	6 of 6 Predicted as Damaging	7.259	1	19.0599	32											rs573299212	1	PASS	1.59096e-05	4	251420	0	0	113726	0	0	2670	0	0	242	0	0	42198	0	0	11504	0	0	26134	0	0	30978	0	0
1:98058830	G/A	DPYD	missense_variant	NM_000110.3:c.1072C>T	NP_000101.2:p.Arg358Cys	6 of 6 Predicted as Damaging	4.731	1	19.0599	32											rs779557503	1	PASS	7.95482e-06	2	251420	0	1	113728	0	0	2670	0	0	240	0	0	42198	0	0	11504	0	1	26134	0	0	30982	0	0
1:98058835	G/A	DPYD	missense_variant	NM_000110.3:c.1067C>T	NP_000101.2:p.Ala356Val	6 of 6 Predicted as Damaging	9.185	1	15.3241	23.7											rs754467630	1	PASS	3.97738e-06	1	251422	0	0	113726	0	0	2670	0	0	242	0	0	42196	0	0	11502	0	0	26134	0	0	30982	0	0
1:98058836	C/T	DPYD	missense_variant	NM_000110.3:c.1066G>A	NP_000101.2:p.Ala356Thr	6 of 6 Predicted as Damaging	7.259	1	15.3908	25											rs1357753702	1	PASS	3.97722e-06	1	251432	0	0	113730	0	0	2670	0	0	242	0	0	42198	0	0	11504	0	0	26134	0	0	30982	0	0
1:98058838	C/G	DPYD	missense_variant	NM_000110.3:c.1064G>C	NP_000101.2:p.Gly355Ala	6 of 6 Predicted as Damaging	7.259	1	15.3908	24.6											rs1228179784	1	PASS	3.97706e-06	1	251442	0	0	113742	0	0	2670	0	0	242	0	0	42206	0	0	11504	0	0	26134	0	0	30986	0	0
1:98058841	C/T	DPYD	missense_variant	NM_000110.3:c.1061G>A	NP_000101.2:p.Cys354Tyr	6 of 6 Predicted as Damaging	7.259	1	19.0599	26.5											rs1285381791	1	PASS	3.97725e-06	1	251430	0	0	113734	0	0	2670	0	0	242	0	0	42204	0	0	11504	0	0	26134	0	0	30980	0	0
1:98058844	C/T	DPYD	missense_variant	NM_000110.3:c.1058G>A	NP_000101.2:p.Arg353His	6 of 6 Predicted as Damaging	7.259	1	19.0599	25.3											rs778601245	1	PASS	1.98863e-05	5	251430	0	0	113738	0	0	2670	0	0	242	0	0	42204	0	0	11504	0	0	26134	0	0	30984	0	0
1:98058848	G/-	DPYD	frameshift_variant	NM_000110.3:c.1054delC	NP_000101.2:p.Leu352Tyrfs*19					19.87											rs771024192	1	PASS	3.97709e-06	1	251440	0	0	113738	0	0	2670	0	0	242	0	0	42204	0	0	11504	0	0	26134	0	0	30984	0	0
1:98058851	C/T	DPYD	missense_variant	NM_000110.3:c.1051G>A	NP_000101.2:p.Ala351Thr	6 of 6 Predicted as Damaging	7.259	1	19.0599	24.6											rs1461339539	1	PASS	3.97722e-06	1	251432	0	0	113728	0	0	2670	0	0	242	0	0	42202	0	0	11500	0	0	26134	0	0	30980	0	0
1:98058854	A/G	DPYD	missense_variant	NM_000110.3:c.1048T>C	NP_000101.2:p.Ser350Pro	6 of 6 Predicted as Damaging	8.687	1	12.4137	23.9			Uncertain Significance	(1 Stars) Criteria Provided, Single Submitter							rs771885007	1	PASS	1.19318e-05	3	251430	0	3	113734	0	0	2670	0	0	242	0	1	42200	0	1	11502	0	0	26134	0	1	30986	0	0
1:98058862	C/T	DPYD	missense_variant	NM_000110.3:c.1040G>A	NP_000101.2:p.Cys347Tyr	6 of 6 Predicted as Damaging	7.259	1	19.0599	27.3											rs746777181	1	PASS	3.97728e-06	1	251428	0	1	113732	0	0	2670	0	0	242	0	0	42204	0	1	11502	0	0	26132	0	0	30982	0	0
1:98058871	G/C	DPYD	missense_variant	NM_000110.3:c.1031C>G	NP_000101.2:p.Ala344Gly	6 of 6 Predicted as Damaging	9.185	1	16.041	26											rs1177627814	1	PASS	3.97722e-06	1	251432	0	0	113732	0	0	2670	0	0	242	0	0	42202	0	0	11502	0	0	26134	0	0	30982	0	0
1:98058881	C/T	DPYD	missense_variant	NM_000110.3:c.1021G>A	NP_000101.2:p.Gly341Arg	6 of 6 Predicted as Damaging	7.259	1	19.0599	29.6											rs764111543	1	PASS	1.19308e-05	3	251450	0	0	113746	0	0	2670	0	0	240	0	0	42210	0	0	11502	0	0	26134	0	0	30990	0	0
1:98058883	G/A	DPYD	missense_variant	NM_000110.3:c.1019C>T	NP_000101.2:p.Ala340Val	6 of 6 Predicted as Damaging	9.185	1	19.0599	29.7											rs1338778459	1	PASS	3.97722e-06	1	251432	0	0	113736	0	0	2670	0	0	240	0	0	42204	0	0	11502	0	0	26134	0	0	30986	0	0
1:98058895	A/G	DPYD	missense_variant	NM_000110.3:c.1007T>C	NP_000101.2:p.Ile336Thr	6 of 6 Predicted as Damaging	8.687	1	15.3933	26.9											rs756372042	1	PASS	1.19313e-05	3	251440	0	0	113736	0	0	2670	0	0	240	0	0	42206	0	0	11496	0	0	26134	0	0	30990	0	0
1:98058936	G/T	DPYD	stop_gained	NM_000110.3:c.966C>A	NP_000101.2:p.Cys322Ter	1 of 6 Predicted as Damaging	-0.133	0.404	15.8031	35											rs768834079	1	PASS	3.9789e-06	1	251326	0	1	113676	0	0	2670	0	0	238	0	1	42176	0	0	11494	0	0	26132	0	0	30966	0	0
1:98058943	C/A	DPYD	missense_variant	NM_000110.3:c.959G>T	NP_000101.2:p.Gly320Val	6 of 6 Predicted as Damaging	7.259	1	19.0599	34	0.999946	0.988									rs1414156000	1	PASS	3.97871e-06	1	251338	0	0	113670	0	0	2670	0	0	238	0	0	42174	0	0	11496	0	0	26132	0	0	30960	0	0
1:98058944	C/T	DPYD	splice_acceptor_variant	NM_000110.3:c.959-1G>A		2 of 6 Predicted as Damaging	7.259	1	19.0599	35	0.99999	0.938									rs1329732851	1	PASS	3.97905e-06	1	251316	0	1	113662	0	0	2670	0	0	236	0	0	42174	0	0	11496	0	0	26132	0	1	30954	0	0
1:98058945	T/C	DPYD	splice_acceptor_variant	NM_000110.3:c.959-2A>G		2 of 6 Predicted as Damaging	7.318	1	15.3933	34	0.999988	0.932									rs577302209	1	PASS	3.97921e-06	1	251306	0	1	113650	0	0	2670	0	0	238	0	0	42164	0	1	11496	0	0	26132	0	0	30950	0	0
1:98060614	C/G	DPYD	splice_donor_variant	NM_000110.3:c.958+1G>C		2 of 6 Predicted as Damaging	6.469	1	16.7583	34	0.99999	0.938									rs760720131	1	PASS	3.98118e-06	1	251182	0	1	113528	0	0	2670	0	0	240	0	0	42096	0	0	11490	0	0	26122	0	1	30910	0	0
1:98060623	C/T	DPYD	missense_variant	NM_000110.3:c.950G>A	NP_000101.2:p.Ser317Asn	6 of 6 Predicted as Damaging	6.469	1	16.7583	26.7											rs777347164	1	PASS	3.98045e-06	1	251228	0	0	113564	0	0	2670	0	0	240	0	0	42114	0	0	11490	0	0	26122	0	0	30928	0	0
1:98060635	A/G	DPYD	missense_variant	NM_000110.3:c.938T>C	NP_000101.2:p.Val313Ala	6 of 6 Predicted as Damaging	7.753	1	13.5118	26.8											rs759967863	1	PASS	7.95887e-06	2	251292	0	2	113606	0	0	2670	0	0	242	0	1	42134	0	0	11494	0	0	26130	0	1	30936	0	0
1:98060642	G/A	DPYD	missense_variant	NM_000110.3:c.931C>T	NP_000101.2:p.Pro311Ser	6 of 6 Predicted as Damaging	8.2	1	16.7583	27.3											rs1447929304	1	PASS	3.97924e-06	1	251304	0	0	113620	0	0	2670	0	0	242	0	0	42144	0	0	11494	0	0	26128	0	0	30942	0	0
1:98060650	T/-	DPYD	frameshift_variant	NM_000110.3:c.923delA	NP_000101.2:p.Asp308Alafs*6					35											rs1426881532	1	PASS	3.97877e-06	1	251334	0	1	113642	0	0	2670	0	0	242	0	1	42156	0	0	11496	0	0	26128	0	0	30950	0	0
1:98060651	C/-	DPYD	frameshift_variant	NM_000110.3:c.922delG	NP_000101.2:p.Asp308Thrfs*6					35											rs759965732	1	PASS	7.95773e-06	2	251328	0	0	113640	0	0	2670	0	0	242	0	0	42156	0	0	11494	0	0	26128	0	0	30950	0	0
1:98060657	A/G	DPYD	missense_variant	NM_000110.3:c.916T>C	NP_000101.2:p.Ser306Pro	6 of 6 Predicted as Damaging	7.753	1	13.5118	25.9											rs1383249780	1	PASS	1.19364e-05	3	251332	0	3	113638	0	0	2670	0	0	240	0	0	42154	0	0	11496	0	0	26130	0	3	30948	0	0
1:98060669	C/T	DPYD	missense_variant	NM_000110.3:c.904G>A	NP_000101.2:p.Gly302Arg	6 of 6 Predicted as Damaging	6.469	1	16.7583	25.4											rs1433934509	1	PASS	3.97905e-06	1	251316	0	0	113628	0	0	2670	0	0	240	0	0	42154	0	0	11492	0	0	26128	0	0	30944	0	0
1:98060690	G/-	DPYD	frameshift_variant	NM_000110.3:c.883delC	NP_000101.2:p.Gln295Lysfs*3					23.2											rs772507658	1	PASS	3.9794e-06	1	251294	0	0	113614	0	0	2668	0	0	240	0	0	42144	0	0	11490	0	0	26130	0	0	30942	0	0
1:98060718	C/G	DPYD	missense_variant	NM_000110.3:c.855G>C	NP_000101.2:p.Leu285Phe	6 of 6 Predicted as Damaging	-0.202	0.8	10.1619	23.3											rs1185938506	1	PASS	3.98311e-06	1	251060	0	0	113474	0	0	2670	0	0	240	0	0	42072	0	0	11488	0	0	26116	0	0	30888	0	0
1:98060719	A/G	DPYD	missense_variant	NM_000110.3:c.854T>C	NP_000101.2:p.Leu285Ser	6 of 6 Predicted as Damaging	7.753	1	13.5118	27.4											rs771194906	1	PASS	3.98362e-06	1	251028	0	0	113470	0	0	2668	0	0	240	0	0	42088	0	0	11480	0	0	26114	0	0	30880	0	1
1:98060722	C/T	DPYD	missense_variant	NM_000110.3:c.851G>A	NP_000101.2:p.Gly284Asp	6 of 6 Predicted as Damaging	6.469	1	16.7583	33	0.999891	0.962									rs777220476	1	PASS	3.98565e-06	1	250900	0	1	113438	0	0	2668	0	0	242	0	0	42068	0	1	11480	0	0	26114	0	0	30866	0	0
1:98060724	T/G	DPYD	splice_acceptor_variant	NM_000110.3:c.851-2A>C		2 of 6 Predicted as Damaging	6.648	1	13.5118	33	0.999988	0.95									rs1160749044	1	PASS	3.98619e-06	1	250866	0	1	113428	0	1	2668	0	0	242	0	0	42064	0	0	11474	0	0	26116	0	0	30864	0	0
1:98144678	C/A	DPYD	missense_variant	NM_000110.3:c.823G>T	NP_000101.2:p.Gly275Cys	6 of 6 Predicted as Damaging	4.324	1	20.1169	29.3											rs1557878231	1	PASS	4.29553e-06	1	232800	0	0	103280	0	0	2522	0	0	236	0	0	41024	0	0	10172	0	0	20652	0	0	28674	0	0
1:98144698	A/T	DPYD	missense_variant	NM_000110.3:c.803T>A	NP_000101.2:p.Leu268His	6 of 6 Predicted as Damaging	7.089	1	16.1924	26.9											rs773983635	1	PASS	4.23499e-06	1	236128	0	1	105048	0	0	2566	0	0	236	0	0	41282	0	1	10400	0	0	21552	0	0	29012	0	0
1:98144730	G/T	DPYD	stop_gained	NM_000110.3:c.771C>A	NP_000101.2:p.Cys257Ter	2 of 6 Predicted as Damaging	1.631	1	7.7726	35											rs754745863	1	PASS	4.5958e-06	1	217590	0	1	94492	0	0	2378	0	0	234	0	0	39834	0	0	9196	0	0	16210	0	1	26640	0	0
1:98157281	C/A	DPYD	missense_variant	NM_000110.3:c.754G>T	NP_000101.2:p.Gly252Cys	6 of 6 Predicted as Damaging	7.412	1	18.7184	31											rs765034707	1	PASS	7.95748e-06	2	251336	0	2	113646	0	0	2668	0	0	240	0	0	42154	0	0	11498	0	2	26132	0	0	30954	0	0
1:98157296	G/T	DPYD	missense_variant	NM_000110.3:c.739C>A	NP_000101.2:p.Leu247Ile	6 of 6 Predicted as Damaging	4.142	1	14.0297	23.9											rs376128878	1	PASS	3.97848e-06	1	251352	0	1	113656	0	0	2670	0	0	240	0	0	42166	0	0	11498	0	0	26132	0	1	30950	0	0
1:98164916	C/T	DPYD	missense_variant	NM_000110.3:c.671G>A	NP_000101.2:p.Gly224Asp	6 of 6 Predicted as Damaging	7.412	1	19.4065	29.2											rs1227066800	1	PASS	3.98635e-06	1	250856	0	0	113246	0	0	2666	0	0	242	0	0	41946	0	0	11458	0	0	26130	0	0	30804	0	0
1:98164917	C/A	DPYD	missense_variant	NM_000110.3:c.670G>T	NP_000101.2:p.Gly224Cys	6 of 6 Predicted as Damaging	7.412	1	19.4065	32											rs755155824	1	PASS	3.98648e-06	1	250848	0	0	113244	0	0	2666	0	0	240	0	0	41944	0	0	11458	0	0	26130	0	0	30806	0	0
1:98164929	G/A	DPYD	stop_gained	NM_000110.3:c.658C>T	NP_000101.2:p.Gln220Ter	2 of 6 Predicted as Damaging	7.511	1	15.7386	38			Likely Pathogenic	(1 Stars) Criteria Provided, Single Submitter							rs1220608789	1	PASS	3.98451e-06	1	250972	0	0	113326	0	0	2668	0	0	242	0	0	41992	0	0	11466	0	0	26126	0	0	30832	0	0
1:98164934	T/C	DPYD	missense_variant	NM_000110.3:c.653A>G	NP_000101.2:p.Glu218Gly	6 of 6 Predicted as Damaging	7.664	1	15.6136	29.6											rs758699471	1	PASS	1.19484e-05	3	251080	0	0	113420	0	0	2668	0	0	242	0	0	42046	0	0	11470	0	0	26130	0	0	30864	0	0
1:98164965	G/A	DPYD	stop_gained	NM_000110.3:c.622C>T	NP_000101.2:p.Arg208Ter	2 of 6 Predicted as Damaging	7.602	1	19.4065	39											rs1411354209	1	PASS	7.96223e-06	2	251186	0	1	113526	0	0	2668	0	0	242	0	0	42094	0	0	11478	0	0	26132	0	1	30912	0	0
1:98164979	G/A	DPYD	missense_variant	NM_000110.3:c.608C>T	NP_000101.2:p.Ala203Val	6 of 6 Predicted as Damaging	9.431	1	19.3869	28.4											rs1372761070	1	PASS	3.9813e-06	1	251174	0	0	113520	0	0	2668	0	0	242	0	0	42090	0	0	11478	0	0	26134	0	0	30908	0	0
1:98164994	G/A	DPYD	missense_variant	NM_000110.3:c.593C>T	NP_000101.2:p.Ala198Val	6 of 6 Predicted as Damaging	7.59	1	19.3869	24.3											rs765309287	1	PASS	3.98178e-06	1	251144	0	0	113504	0	0	2668	0	0	242	0	0	42078	0	0	11480	0	0	26134	0	0	30902	0	0
1:98164994	G/T	DPYD	missense_variant	NM_000110.3:c.593C>A	NP_000101.2:p.Ala198Glu	6 of 6 Predicted as Damaging	7.59	1	19.3869	27											rs765309287	1	PASS	3.98178e-06	1	251144	0	0	113504	0	0	2668	0	0	242	0	0	42078	0	0	11480	0	0	26134	0	0	30902	0	0
1:98164995	C/G	DPYD	missense_variant	NM_000110.3:c.592G>C	NP_000101.2:p.Ala198Pro	6 of 6 Predicted as Damaging	7.454	1	19.387	27.5											rs753166888	1	PASS	7.96362e-06	2	251142	0	1	113510	0	0	2668	0	0	242	0	1	42084	0	0	11478	0	0	26132	0	0	30906	0	0
1:98164998	G/T	DPYD	missense_variant	NM_000110.3:c.589C>A	NP_000101.2:p.Pro197Thr	6 of 6 Predicted as Damaging	9.431	1	19.3869	26											rs764635955	1	PASS	3.58383e-05	9	251128	0	0	113494	0	0	2668	0	0	242	0	0	42078	0	0	11472	0	0	26134	0	0	30900	0	0
1:98165006	C/A	DPYD	missense_variant	NM_000110.3:c.581G>T	NP_000101.2:p.Gly194Val	6 of 6 Predicted as Damaging	7.454	1	19.387	27.5											rs751841116	1	PASS	3.98248e-06	1	251100	0	1	113496	0	0	2668	0	0	242	0	0	42088	0	0	11476	0	1	26132	0	0	30890	0	0
1:98165006	C/T	DPYD	missense_variant	NM_000110.3:c.581G>A	NP_000101.2:p.Gly194Asp	6 of 6 Predicted as Damaging	7.454	1	19.387	27.7											rs751841116	1	PASS	3.98248e-06	1	251100	0	1	113496	0	0	2668	0	0	242	0	0	42088	0	0	11476	0	1	26132	0	0	30890	0	0
1:98165031	A/C	DPYD	missense_variant	NM_000110.3:c.556T>G	NP_000101.2:p.Tyr186Asp	6 of 6 Predicted as Damaging	8.92	1	15.5975	27.9											rs755645831	1	PASS	3.984e-06	1	251004	0	0	113474	0	0	2668	0	0	242	0	0	42082	0	0	11470	0	0	26132	0	0	30880	0	1
1:98165043	-/T	DPYD	frameshift_variant	NM_000110.3:c.544dupA	NP_000101.2:p.Met182Asnfs*3					34											rs754785410	1	PASS	3.98483e-06	1	250952	0	0	113454	0	0	2668	0	0	242	0	0	42064	0	0	11472	0	0	26132	0	0	30876	0	0
1:98165071	T/G	DPYD	missense_variant	NM_000110.3:c.516A>C	NP_000101.2:p.Arg172Ser	6 of 6 Predicted as Damaging	0.195	0.99	9.3479	23.5											rs1299283418	1	PASS	3.98273e-06	1	251084	0	0	113498	0	0	2668	0	0	242	0	0	42082	0	0	11478	0	0	26130	0	0	30898	0	1
1:98186473	GG/-	DPYD	frameshift_variant	NM_000110.3:c.483+592_483+593delCC						2.433											rs1231288106	1	PASS	4.05584e-06	1	246558	0	0	111582	0	0	2656	0	0	238	0	0	41466	0	0	11250	0	0	25744	0	0	30228	0	0
1:98186483	C/T	DPYD	splice_acceptor_variant	NM_000110.3:c.483+583G>A		0 of 6 Predicted as Damaging	0.259		2.4016	5.268	0.00017448	0.002									rs749542456	1	PASS	4.0707e-06	1	245658	0	1	111172	0	0	2654	0	0	238	0	0	41318	0	0	11214	0	0	25648	0	1	30100	0	0
1:98187065	C/A	DPYD	splice_donor_variant	NM_000110.3:c.483+1G>T		2 of 6 Predicted as Damaging	7.433	1	20.2381	34	0.99999	0.938	Likely Pathogenic	(1 Stars) Criteria Provided, Single Submitter							rs1057516763	1	PASS	3.99345e-06	1	250410	0	0	113076	0	0	2666	0	0	238	0	0	41850	0	0	11436	0	0	26114	0	0	30772	0	0
1:98187082	T/C	DPYD	missense_variant	NM_000110.3:c.467A>G	NP_000101.2:p.Gln156Arg	6 of 6 Predicted as Damaging	7.642	1	16.2965	28											rs536577604	1	PASS	3.99077e-06	1	250578	0	0	113170	0	0	2666	0	0	238	0	0	41902	0	0	11452	0	0	26116	0	0	30796	0	0
1:98187131	A/G	DPYD	missense_variant	NM_000110.3:c.418T>C	NP_000101.2:p.Cys140Arg	6 of 6 Predicted as Damaging	8.896	1	16.2965	28.8											rs1268173610	1	PASS	3.99026e-06	1	250610	0	0	113180	0	0	2668	0	0	242	0	0	41912	0	0	11458	0	0	26112	0	0	30788	0	0
1:98187155	T/A	DPYD	missense_variant	NM_000110.3:c.394A>T	NP_000101.2:p.Thr132Ser	6 of 6 Predicted as Damaging	7.642	1	16.6245	26.1											rs538336580	1	PASS	7.98199e-06	2	250564	0	0	113142	0	0	2668	0	0	242	0	0	41882	0	0	11446	0	0	26114	0	0	30790	0	0
1:98187163	A/C	DPYD	missense_variant	NM_000110.3:c.386T>G	NP_000101.2:p.Val129Gly	6 of 6 Predicted as Damaging	8.896	1	16.6245	27.8											rs748320430	1	PASS	1.99582e-05	5	250524	0	1	113114	0	0	2668	0	0	242	0	1	41878	0	0	11444	0	0	26116	0	0	30766	0	0
1:98187190	T/G	DPYD	missense_variant	NM_000110.3:c.359A>C	NP_000101.2:p.Asn120Thr	6 of 6 Predicted as Damaging	7.642	1	16.6245	26.6											rs771534236	1	PASS	3.99485e-06	1	250322	0	0	112970	0	0	2668	0	0	240	0	0	41806	0	0	11434	0	0	26100	0	0	30722	0	0
1:98187190	T/C	DPYD	missense_variant	NM_000110.3:c.359A>G	NP_000101.2:p.Asn120Ser	6 of 6 Predicted as Damaging	7.642	1	16.6245	25.7											rs771534236	1	PASS	7.98971e-06	2	250322	0	0	112970	0	0	2668	0	0	240	0	0	41806	0	0	11434	0	0	26100	0	0	30722	0	0
1:98187192	G/T	DPYD	missense_variant	NM_000110.3:c.357C>A	NP_000101.2:p.Asp119Glu	6 of 6 Predicted as Damaging	3.217	1	10.5044	24											rs777348913	1	PASS	7.99162e-06	2	250262	0	2	112914	0	0	2668	0	0	240	0	1	41780	0	1	11430	0	0	26098	0	0	30698	0	0
1:98187223	T/C	DPYD	missense_variant	NM_000110.3:c.326A>G	NP_000101.2:p.Tyr109Cys	6 of 6 Predicted as Damaging	7.642	1	16.6245	29.5											rs1312400771	1	PASS	4.00991e-06	1	249382	0	1	112412	0	0	2666	0	0	238	0	0	41540	0	0	11390	0	0	26042	0	1	30536	0	0
1:98187223	T/G	DPYD	missense_variant	NM_000110.3:c.326A>C	NP_000101.2:p.Tyr109Ser	6 of 6 Predicted as Damaging	7.642	1	16.6245	28.8											rs1312400771	1	PASS	4.00991e-06	1	249382	0	0	112412	0	0	2666	0	0	238	0	0	41540	0	0	11390	0	0	26042	0	0	30536	0	0
1:98187225	G/T	DPYD	missense_variant	NM_000110.3:c.324C>A	NP_000101.2:p.Asn108Lys	6 of 6 Predicted as Damaging	3.24	1	9.4358	24.1											rs762430779	1	PASS	4.01287e-06	1	249198	0	1	112328	0	0	2666	0	0	238	0	1	41530	0	0	11382	0	0	26022	0	0	30490	0	0
1:98205982	T/A	DPYD	missense_variant	NM_000110.3:c.287A>T	NP_000101.2:p.Asp96Val	6 of 6 Predicted as Damaging	5.678	1	12.7466	24.9											rs771573678	1	PASS	4.37905e-05	11	251196	1	0	113612	0	0	2668	0	0	242	0	0	42142	0	0	11492	0	0	26128	0	0	30940	0	0
1:98205983	C/G	DPYD	missense_variant	NM_000110.3:c.286G>C	NP_000101.2:p.Asp96His	6 of 6 Predicted as Damaging	5.482	1	19.8102	26.1											rs773159364	1	PASS	3.98127e-06	1	251176	0	1	113602	0	0	2668	0	0	242	0	0	42140	0	0	11492	0	1	26128	0	0	30932	0	0
1:98205991	G/C	DPYD	missense_variant	NM_000110.3:c.278C>G	NP_000101.2:p.Thr93Ser	6 of 6 Predicted as Damaging	9.069	1	19.5135	25.1											rs760553268	1	PASS	1.19446e-05	3	251160	1	2	113596	1	0	2668	0	0	242	0	0	42132	0	2	11492	1	0	26130	0	0	30932	0	0
1:98206009	C/A	DPYD	missense_variant	NM_000110.3:c.260G>T	NP_000101.2:p.Cys87Phe	6 of 6 Predicted as Damaging	7.172	1	19.5135	29.3											rs528152707	1	PASS	1.19475e-05	3	251098	0	0	113584	0	0	2670	0	0	242	0	0	42116	0	0	11490	0	0	26132	0	0	30934	0	0
1:98206016	C/A	DPYD	missense_variant	NM_000110.3:c.253G>T	NP_000101.2:p.Ala85Ser	6 of 6 Predicted as Damaging	7.172	1	19.5135	28.9											rs757342874	1	PASS	7.96654e-06	2	251050	0	2	113584	0	0	2668	0	0	242	0	2	42114	0	0	11490	0	0	26132	0	0	30938	0	0
1:98206016	C/T	DPYD	missense_variant	NM_000110.3:c.253G>A	NP_000101.2:p.Ala85Thr	6 of 6 Predicted as Damaging	7.172	1	19.5135	32											rs757342874	1	PASS	1.19498e-05	3	251050	0	0	113584	0	0	2668	0	0	242	0	0	42114	0	0	11490	0	0	26132	0	0	30938	0	0
1:98206031	G/C	DPYD	missense_variant	NM_000110.3:c.238C>G	NP_000101.2:p.Leu80Val	6 of 6 Predicted as Damaging	0.784	1	8.8551	22.9											rs1392368213	1	PASS	3.98635e-06	1	250856	0	1	113562	0	0	2670	0	0	242	0	0	42106	0	0	11490	0	0	26130	0	1	30924	0	0
1:98206033	C/A	DPYD	missense_variant	NM_000110.3:c.236G>T	NP_000101.2:p.Cys79Phe	6 of 6 Predicted as Damaging	7.172	1	19.3171	27.4											rs1474728674	1	PASS	3.98692e-06	1	250820	0	0	113556	0	0	2670	0	0	242	0	0	42098	0	0	11492	0	0	26126	0	0	30928	0	0
1:98206036	C/T	DPYD	splice_acceptor_variant	NM_000110.3:c.234-1G>A		2 of 6 Predicted as Damaging	7.172	1	19.3171	32	0.999986	0.936									rs1390835864	1	PASS	3.98813e-06	1	250744	0	0	113540	0	0	2670	0	0	242	0	0	42100	0	0	11488	0	0	26130	0	0	30910	0	0
1:98293671	T/A	DPYD	stop_gained	NM_000110.3:c.232A>T	NP_000101.2:p.Arg78Ter	2 of 6 Predicted as Damaging	5.15	1	15.9299	41	0.99119	0.556	Likely Pathogenic	(1 Stars) Criteria Provided, Single Submitter							rs776692894	1	PASS	3.98365e-06	1	251026	0	1	113480	0	0	2668	0	0	242	0	0	42068	0	1	11494	0	0	26124	0	0	30884	0	0
1:98293683	G/A	DPYD	stop_gained	NM_000110.3:c.220C>T	NP_000101.2:p.Arg74Ter	2 of 6 Predicted as Damaging	4.508	1	15.8284	38			Conflicting Interpretations Of Pathogenicity	(1 Star) Criteria Provided, Conflicting Interpretations							rs189768576	1	PASS	0.000131491	33	250968	0	0	113426	0	0	2668	0	0	242	0	0	42044	0	0	11488	0	0	26118	0	0	30866	0	0
1:98293709	G/C	DPYD	missense_variant	NM_000110.3:c.194C>G	NP_000101.2:p.Thr65Arg	6 of 6 Predicted as Damaging	8.487	1	19.7936	26.1											rs371587702	1	PASS	7.97296e-06	2	250848	0	2	113366	0	0	2668	0	0	242	0	0	42006	0	0	11488	0	2	26124	0	0	30838	0	0
1:98293748	C/T	DPYD	missense_variant	NM_000110.3:c.155G>A	NP_000101.2:p.Cys52Tyr	6 of 6 Predicted as Damaging	5.049	1	19.5425	24.6											rs1312133018	1	PASS	3.99683e-06	1	250198	0	1	113110	0	0	2666	0	0	240	0	0	41910	0	0	11452	0	0	26094	0	1	30748	0	0
1:98348819	C/G	DPYD	splice_donor_variant	NM_000110.3:c.150+1G>C		2 of 6 Predicted as Damaging	5.344	1	17.0514	33	0.999989	0.934									rs375356630	1	PASS	3.99783e-06	1	250136	0	1	112894	0	1	2668	0	0	240	0	0	41862	0	0	11448	0	0	25974	0	0	30702	0	0
1:98348836	GGATTTCT/-	DPYD	stop_gained	NM_000110.3:c.127_134delAGAAATCC	NP_000101.2:p.Arg43Terfs					35			Pathogenic/Likely Pathogenic	(1 Stars) Criteria Provided, Single Submitter,(1 Stars) Criteria Provided, Single Submitter							rs1207177925	1	PASS	3.99304e-06	1	250436	0	1	113044	0	0	2668	0	0	242	0	0	41896	0	0	11458	0	0	26022	0	1	30758	0	0
1:98348879	T/C	DPYD	missense_variant	NM_000110.3:c.91A>G	NP_000101.2:p.Thr31Ala	6 of 6 Predicted as Damaging	5.491	1	13.7342	25.1											rs768501828	1	PASS	3.9868e-06	1	250828	0	1	113308	0	0	2668	0	0	242	0	0	41996	0	1	11478	0	0	26078	0	0	30846	0	0
1:98348911	G/C	DPYD	missense_variant	NM_000110.3:c.59C>G	NP_000101.2:p.Pro20Arg	6 of 6 Predicted as Damaging	6.603	1	17.0514	27.6											rs753217888	1	PASS	3.98549e-06	1	250910	0	1	113428	0	0	2668	0	0	242	0	1	42066	0	0	11488	0	0	26058	0	0	30906	0	0
1:98348923	A/G	DPYD	missense_variant	NM_000110.3:c.47T>C	NP_000101.2:p.Leu16Pro	6 of 6 Predicted as Damaging	6.257	1	13.7342	27.4											rs764555085	1	PASS	3.98556e-06	1	250906	0	1	113464	0	0	2668	0	0	242	0	0	42108	0	1	11492	0	0	26038	0	0	30916	0	0
1:98348930	-/AGCATAA	DPYD	frameshift_variant	NM_000110.3:c.40_41insTTATGCT	NP_000101.2:p.Ser14Ilefs*35					28.8											rs1248426717	1	PASS	3.98619e-06	1	250866	0	0	113430	0	0	2668	0	0	242	0	0	42104	0	0	11492	0	0	26024	0	0	30900	0	0
1:98386443	G/C	DPYD	missense_variant	NM_000110.3:c.36C>G	NP_000101.2:p.Ile12Met	6 of 6 Predicted as Damaging	0.79	1	7.6028	22.9											rs376273539	1	PASS	9.31584e-06	2	214688	0	2	94676	0	0	1764	0	0	216	0	1	40038	0	1	8422	0	0	18344	0	0	25892	0	0
1:98386448	C/T	DPYD	missense_variant	NM_000110.3:c.31G>A	NP_000101.2:p.Asp11Asn	6 of 6 Predicted as Damaging	3.617	1	10.8699	24.4											rs1236287352	1	PASS	4.62317e-06	1	216302	0	1	95536	0	0	1780	0	0	220	0	0	40118	0	0	8552	0	0	18750	0	1	26116	0	0
1:98386456	T/A	DPYD	missense_variant	NM_000110.3:c.23A>T	NP_000101.2:p.Asp8Val	6 of 6 Predicted as Damaging	3.714	1	8.721	26.4											rs769190350	1	PASS	1.84908e-05	4	216324	0	0	95552	0	0	1778	0	0	220	0	0	40110	0	0	8532	0	0	18806	0	0	26106	0	0
1:169483564	C/T	F5	missense_variant	NM_000130.4:c.6662G>A	NP_000121.2:p.Cys2221Tyr	6 of 6 Predicted as Damaging	6.309	1	17.7466	27.8											rs1373350559	1	PASS	3.98305e-06	1	251064	0	1	113532	0	0	2668	0	0	240	0	1	42088	0	0	11490	0	0	26112	0	0	30934	0	0
1:169483570	A/C	F5	missense_variant	NM_000130.4:c.6656T>G	NP_000121.2:p.Phe2219Cys	6 of 6 Predicted as Damaging	3.641	0.998	10.5169	26.7											rs773692875	1	PASS	3.98222e-06	1	251116	0	0	113586	0	0	2668	0	0	240	0	0	42124	0	0	11488	0	0	26110	0	0	30956	0	0
1:169483582	C/A	F5	missense_variant	NM_000130.4:c.6644G>T	NP_000121.2:p.Arg2215Leu	6 of 6 Predicted as Damaging	6.309	1	18.0692	32											rs952196842	1	PASS	3.98311e-06	1	251060	0	1	113544	0	0	2668	0	0	240	0	0	42110	0	1	11488	0	0	26104	0	0	30934	0	0
1:169483582	C/T	F5	missense_variant	NM_000130.4:c.6644G>A	NP_000121.2:p.Arg2215His	6 of 6 Predicted as Damaging	6.309	1	18.0692	32											rs952196842	1	PASS	3.98311e-06	1	251060	0	1	113544	0	0	2668	0	0	240	0	1	42110	0	0	11488	0	0	26104	0	0	30934	0	0
1:169483583	G/A	F5	missense_variant	NM_000130.4:c.6643C>T	NP_000121.2:p.Arg2215Cys	6 of 6 Predicted as Damaging	4.549	1	13.0971	32											rs984836970	1	PASS	7.96616e-06	2	251062	0	1	113550	0	0	2668	0	0	240	0	0	42110	0	0	11486	0	0	26104	0	1	30942	0	0
1:169483588	G/A	F5	missense_variant	NM_000130.4:c.6638C>T	NP_000121.2:p.Ala2213Val	6 of 6 Predicted as Damaging	6.056	1	18.0692	29.4											rs199629447	1	PASS	3.98308e-06	1	251062	0	0	113546	0	0	2668	0	0	240	0	0	42114	0	0	11492	0	0	26104	0	0	30928	0	1
1:169483602	C/G	F5	missense_variant	NM_000130.4:c.6624G>C	NP_000121.2:p.Trp2208Cys	6 of 6 Predicted as Damaging	6.459	1	18.0692	33											rs1557902763	1	PASS	3.98397e-06	1	251006	0	0	113520	0	0	2668	0	0	240	0	0	42106	0	0	11484	0	0	26092	0	0	30930	0	0
1:169483604	A/G	F5	missense_variant	NM_000130.4:c.6622T>C	NP_000121.2:p.Trp2208Arg	6 of 6 Predicted as Damaging	7.699	1	14.5117	29.9											rs1230851293	1	PASS	3.98343e-06	1	251040	0	1	113554	0	1	2668	0	0	240	0	0	42118	0	0	11492	0	0	26098	0	0	30938	0	0
1:169483613	G/A	F5	missense_variant	NM_000130.4:c.6613C>T	NP_000121.2:p.Pro2205Ser	6 of 6 Predicted as Damaging	8.131	1	18.0692	27.9											rs750661511	1	PASS	3.9841e-06	1	250998	0	1	113530	0	0	2668	0	0	240	0	0	42112	0	0	11486	0	1	26092	0	0	30932	0	0
1:169483630	C/G	F5	missense_variant	NM_000130.4:c.6596G>C	NP_000121.2:p.Arg2199Thr	6 of 6 Predicted as Damaging	6.459	1	18.0692	26.5											rs748029037	1	PASS	7.96991e-06	2	250944	0	0	113512	0	0	2668	0	0	240	0	0	42116	0	0	11490	0	0	26076	0	0	30922	0	2
1:169483631	T/C	F5	missense_variant	NM_000130.4:c.6595A>G	NP_000121.2:p.Arg2199Gly	6 of 6 Predicted as Damaging	1.782	1	11.4914	25.9											rs755983488	1	PASS	3.98518e-06	1	250930	0	1	113504	0	0	2668	0	0	240	0	0	42112	0	0	11482	0	0	26082	0	1	30920	0	0
1:169483633	G/T	F5	missense_variant	NM_000130.4:c.6593C>A	NP_000121.2:p.Ser2198Tyr	6 of 6 Predicted as Damaging	8.131	1	18.0692	28											rs878881708	1	PASS	3.98495e-06	1	250944	0	0	113518	0	0	2668	0	0	240	0	0	42116	0	0	11484	0	0	26078	0	0	30932	0	0
1:169483642	-/G	F5	frameshift_variant	NM_000130.4:c.6584dupC	NP_000121.2:p.Ile2196Asnfs*11					29.2											rs1557902803	1	PASS	3.98552e-06	1	250908	0	0	113498	0	0	2668	0	0	240	0	0	42112	0	0	11482	0	0	26066	0	0	30930	0	0
1:169483642	G/C	F5	missense_variant	NM_000130.4:c.6584C>G	NP_000121.2:p.Pro2195Arg	6 of 6 Predicted as Damaging	8.131	1	18.0692	27.4											rs1165178830	1	PASS	3.98632e-06	1	250858	0	1	113466	0	0	2668	0	0	240	0	1	42108	0	0	11482	0	0	26062	0	0	30906	0	0
1:169483643	G/A	F5	missense_variant	NM_000130.4:c.6583C>T	NP_000121.2:p.Pro2195Ser	6 of 6 Predicted as Damaging	8.131	1	18.0692	27.1											rs773959259	1	PASS	3.98616e-06	1	250868	0	0	113464	0	0	2668	0	0	240	0	0	42104	0	0	11482	0	0	26064	0	0	30906	0	0
1:169483651	A/C	F5	missense_variant	NM_000130.4:c.6575T>G	NP_000121.2:p.Phe2192Cys	6 of 6 Predicted as Damaging	5.97	1	14.5117	29.5											rs776991007	1	PASS	3.98622e-06	1	250864	0	0	113454	0	0	2668	0	0	240	0	0	42100	0	0	11484	0	0	26056	0	0	30906	0	0
1:169483651	A/G	F5	missense_variant	NM_000130.4:c.6575T>C	NP_000121.2:p.Phe2192Ser	6 of 6 Predicted as Damaging	5.97	1	14.5117	29											rs776991007	1	PASS	3.98622e-06	1	250864	0	0	113454	0	0	2668	0	0	240	0	0	42100	0	0	11484	0	0	26056	0	0	30906	0	0
1:169483698	C/A	F5	splice_acceptor_variant	NM_000130.4:c.6529-1G>T		2 of 6 Predicted as Damaging	4.794	1	18.4709	29	0.999938	0.94									rs547102775	1	PASS	1.19958e-05	3	250088	0	0	113052	0	0	2664	0	0	240	0	0	41982	0	0	11434	0	0	25936	0	0	30796	0	3
1:169484809	G/A	F5	missense_variant	NM_000130.4:c.6401C>T	NP_000121.2:p.Thr2134Met	6 of 6 Predicted as Damaging	6.24	1	19.223	25.2											rs199601865	1	PASS	0.000179422	45	250806	0	20	113322	0	1	2668	0	0	242	0	3	41986	0	2	11468	0	8	26104	0	6	30854	0	0
1:169484836	A/T	F5	missense_variant	NM_000130.4:c.6374T>A	NP_000121.2:p.Ile2125Asn	6 of 6 Predicted as Damaging	7.699	1	15.6608	28.9											rs764090739	1	PASS	3.9909e-06	1	250570	0	0	113196	0	0	2668	0	0	242	0	0	41928	0	0	11460	0	0	26092	0	0	30806	0	0
1:169487675	C/T	F5	missense_variant	NM_000130.4:c.6320G>A	NP_000121.2:p.Gly2107Glu	6 of 6 Predicted as Damaging	6.691	1	17.5417	29.4											rs780611660	1	PASS	1.99151e-05	5	251066	0	3	113384	0	0	2668	0	0	242	0	1	41982	0	0	11496	0	0	26118	0	2	30878	0	0
1:169487691	G/-	F5	frameshift_variant	NM_000130.4:c.6304delC	NP_000121.2:p.Arg2102Valfs*2					35											rs760084344	1	PASS	3.98248e-06	1	251100	0	1	113430	0	0	2668	0	0	242	0	0	42016	0	0	11496	0	0	26116	0	1	30892	0	0
1:169487780	A/G	F5	missense_variant	NM_000130.4:c.6215T>C	NP_000121.2:p.Met2072Thr	6 of 6 Predicted as Damaging	7.982	1	14.1268	26.2											rs751215852	1	PASS	3.98178e-06	1	251144	0	0	113542	0	0	2668	0	0	242	0	0	42130	0	0	11492	0	0	26078	0	0	30932	0	1
1:169487790	G/A	F5	missense_variant	NM_000130.4:c.6205C>T	NP_000121.2:p.Pro2069Ser	6 of 6 Predicted as Damaging	8.432	1	17.522	28.6											rs564167068	1	PASS	2.78787e-05	7	251088	0	6	113512	0	0	2668	0	0	242	0	5	42116	0	0	11482	0	0	26072	0	1	30932	0	0
1:169489769	C/T	F5	missense_variant	NM_000130.4:c.6182G>A	NP_000121.2:p.Cys2061Tyr	6 of 6 Predicted as Damaging	6.745	1	19.6581	28.4											rs750944413	1	PASS	3.98108e-06	1	251188	0	1	113504	0	0	2668	0	0	240	0	0	42092	0	1	11480	0	0	26120	0	0	30904	0	0
1:169489770	A/G	F5	missense_variant	NM_000130.4:c.6181T>C	NP_000121.2:p.Cys2061Arg	6 of 6 Predicted as Damaging	8.052	1	15.8164	27.7											rs987775725	1	PASS	3.98089e-06	1	251200	0	0	113514	0	0	2668	0	0	240	0	0	42092	0	0	11480	0	0	26122	0	0	30912	0	0
1:169489781	T/A	F5	missense_variant	NM_000130.4:c.6170A>T	NP_000121.2:p.Glu2057Val	6 of 6 Predicted as Damaging	6.935	1	15.8164	26.9											rs758936163	1	PASS	3.98124e-06	1	251178	0	0	113492	0	0	2668	0	0	242	0	0	42076	0	0	11480	0	0	26118	0	0	30908	0	0
1:169489788	G/A	F5	stop_gained	NM_000130.4:c.6163C>T	NP_000121.2:p.Arg2055Ter	2 of 6 Predicted as Damaging	8.508	1	19.6581	52											rs199690772	1	PASS	1.1945e-05	3	251152	0	1	113468	0	0	2668	0	0	242	0	0	42052	0	1	11480	0	0	26116	0	0	30910	0	0
1:169489791	G/A	F5	missense_variant	NM_000130.4:c.6160C>T	NP_000121.2:p.Leu2054Phe	6 of 6 Predicted as Damaging	4.257	1	13.9629	26.2											rs751953453	1	PASS	7.96311e-06	2	251158	0	2	113476	0	0	2668	0	0	242	0	0	42058	0	0	11480	0	0	26118	0	2	30910	0	0
1:169489805	T/C	F5	missense_variant	NM_000130.4:c.6146A>G	NP_000121.2:p.Tyr2049Cys	6 of 6 Predicted as Damaging	3.124	1	11.8357	25.7											rs755294580	1	PASS	1.9911e-05	5	251118	0	2	113458	0	0	2668	0	0	240	0	1	42062	0	1	11478	0	0	26108	0	0	30902	0	0
1:169489809	C/-	F5	frameshift_variant	NM_000130.4:c.6142delG	NP_000121.2:p.Ala2048Profs*16					29.3											rs1557905330	1	PASS	3.98248e-06	1	251100	0	0	113450	0	0	2668	0	0	238	0	0	42058	0	0	11478	0	0	26104	0	0	30904	0	0
1:169489817	G/A	F5	missense_variant	NM_000130.4:c.6134C>T	NP_000121.2:p.Pro2045Leu	6 of 6 Predicted as Damaging	8.508	1	19.6581	32											rs1370956676	1	PASS	3.98337e-06	1	251044	0	1	113406	0	0	2668	0	0	238	0	0	42040	0	0	11476	0	0	26086	0	1	30898	0	0
1:169489829	A/G	F5	missense_variant	NM_000130.4:c.6122T>C	NP_000121.2:p.Ile2041Thr	6 of 6 Predicted as Damaging	8.052	1	15.2069	28.1											rs1364834534	1	PASS	3.98438e-06	1	250980	0	0	113376	0	0	2668	0	0	238	0	0	42034	0	0	11476	0	0	26074	0	0	30886	0	0
1:169489868	T/G	F5	missense_variant	NM_000130.4:c.6083A>C	NP_000121.2:p.Lys2028Thr	6 of 6 Predicted as Damaging	2.647	1	10.8265	23.6											rs1268827129	1	PASS	3.98356e-06	1	251032	0	1	113434	0	0	2668	0	0	240	0	0	42080	0	1	11484	0	0	26066	0	0	30896	0	0
1:169492433	A/G	F5	splice_donor_variant	NM_000130.4:c.6048+2T>C		2 of 6 Predicted as Damaging	7.384	1	15.3436	33	0.999438	0.842									rs1437536953	1	PASS	3.9814e-06	1	251168	0	0	113504	0	0	2668	0	0	242	0	0	42086	0	0	11478	0	0	26122	0	0	30908	0	0
1:169492434	C/A	F5	splice_donor_variant	NM_000130.4:c.6048+1G>T		2 of 6 Predicted as Damaging	3.595	1	8.9829	31	0.99998	0.91									rs1334901179	1	PASS	3.98159e-06	1	251156	0	1	113492	0	0	2668	0	0	242	0	1	42070	0	0	11480	0	0	26120	0	0	30912	0	0
1:169492545	C/G	F5	missense_variant	NM_000130.4:c.5938G>C	NP_000121.2:p.Gly1980Arg	6 of 6 Predicted as Damaging	7.232	1	19.76	32											rs779950139	1	PASS	3.98038e-06	1	251232	0	0	113574	0	0	2668	0	0	242	0	0	42130	0	0	11482	0	0	26118	0	0	30934	0	0
1:169492550	G/A	F5	missense_variant	NM_000130.4:c.5933C>T	NP_000121.2:p.Thr1978Ile	6 of 6 Predicted as Damaging	6.119	1	19.76	26.7											rs768425862	1	PASS	3.98061e-06	1	251218	0	1	113556	0	0	2668	0	0	242	0	0	42114	0	1	11482	0	0	26114	0	0	30936	0	0
1:169492551	T/A	F5	missense_variant	NM_000130.4:c.5932A>T	NP_000121.2:p.Thr1978Ser	6 of 6 Predicted as Damaging	5.726	1	11.7151	22.5											rs776413166	1	PASS	7.96128e-06	2	251216	0	2	113558	0	0	2668	0	0	242	0	0	42118	0	0	11478	0	1	26110	0	1	30942	0	0
1:169492554	G/A	F5	stop_gained	NM_000130.4:c.5929C>T	NP_000121.2:p.Gln1977Ter	2 of 6 Predicted as Damaging	3.663	1	14.5833	48											rs747749755	1	PASS	3.98102e-06	1	251192	0	0	113536	0	0	2668	0	0	242	0	0	42104	0	0	11480	0	0	26108	0	0	30934	0	0
1:169492556	A/T	F5	missense_variant	NM_000130.4:c.5927T>A	NP_000121.2:p.Ile1976Asn	6 of 6 Predicted as Damaging	8.646	1	11.4575	27.6											rs1351801804	1	PASS	1.19431e-05	3	251192	0	2	113538	0	0	2668	0	0	242	0	2	42108	0	0	11480	0	0	26104	0	0	30936	0	0
1:169492560	C/G	F5	missense_variant	NM_000130.4:c.5923G>C	NP_000121.2:p.Gly1975Arg	6 of 6 Predicted as Damaging	4.065	0.999	19.76	25.3											rs146312772	1	PASS	0.000143341	36	251150	0	4	113506	0	0	2668	0	0	242	0	0	42086	0	1	11482	0	0	26100	0	3	30928	0	0
1:169493049	G/A	F5	missense_variant	NM_000130.4:c.5882C>T	NP_000121.2:p.Pro1961Leu	6 of 6 Predicted as Damaging	4.52	1	20.0825	29.7											rs1388508540	1	PASS	3.98546e-06	1	250912	0	1	113440	0	0	2668	0	0	242	0	0	42052	0	0	11470	0	0	26126	0	1	30882	0	0
1:169493050	G/T	F5	missense_variant	NM_000130.4:c.5881C>A	NP_000121.2:p.Pro1961Thr	6 of 6 Predicted as Damaging	1.1	0.885	10.805	23.5											rs748741328	1	PASS	2.78976e-05	7	250918	0	7	113432	0	0	2668	0	0	242	0	0	42046	0	0	11466	0	7	26128	0	0	30882	0	0
1:169493085	C/T	F5	missense_variant	NM_000130.4:c.5846G>A	NP_000121.2:p.Ser1949Asn	6 of 6 Predicted as Damaging	5.513	1	14.3656	25.8											rs761177380	1	PASS	7.96781e-06	2	251010	0	2	113436	0	0	2668	0	0	242	0	1	42044	0	0	11476	0	0	26130	0	1	30876	0	0
1:169493087	C/T	F5	stop_gained	NM_000130.4:c.5844G>A	NP_000121.2:p.Trp1948Ter	2 of 6 Predicted as Damaging	6.987	1	20.0826	49											rs1286783795	1	PASS	3.98346e-06	1	251038	0	1	113454	0	0	2668	0	0	242	0	0	42062	0	0	11474	0	0	26130	0	1	30878	0	0
1:169493103	C/G	F5	missense_variant	NM_000130.4:c.5828G>C	NP_000121.2:p.Gly1943Ala	6 of 6 Predicted as Damaging	6.987	1	20.0826	27.7											rs762072342	1	PASS	1.19572e-05	3	250894	0	0	113358	0	0	2666	0	0	242	0	0	41998	0	0	11478	0	0	26126	0	0	30848	0	0
1:169493115	A/C	F5	stop_gained	NM_000130.4:c.5816T>G	NP_000121.2:p.Leu1939Ter	2 of 6 Predicted as Damaging	8.355	1	16.1699	46											rs750570307	1	PASS	3.98753e-06	1	250782	0	0	113292	0	0	2668	0	0	242	0	0	41948	0	0	11472	0	0	26126	0	0	30836	0	1
1:169493131	G/A	F5	missense_variant	NM_000130.4:c.5800C>T	NP_000121.2:p.Pro1934Ser	6 of 6 Predicted as Damaging	7.027	1	14.808	26.1											rs766428271	1	PASS	1.59618e-05	4	250598	0	0	113260	0	0	2666	0	0	242	0	0	41934	0	0	11466	0	0	26126	0	0	30826	0	3
1:169493143	C/T	F5	splice_acceptor_variant	NM_000130.4:c.5789-1G>A		2 of 6 Predicted as Damaging	6.987	1	20.0826	29.1	0.999982										rs1471977901	1	PASS	3.99454e-06	1	250342	0	1	113196	0	0	2668	0	0	242	0	1	41896	0	0	11460	0	0	26122	0	0	30808	0	0
1:169493143	C/A	F5	splice_acceptor_variant	NM_000130.4:c.5789-1G>T		2 of 6 Predicted as Damaging	6.987	1	20.0826	28.6	0.999982										rs1471977901	1	PASS	7.98907e-06	2	250342	0	0	113196	0	0	2668	0	0	242	0	0	41896	0	0	11460	0	0	26122	0	0	30808	0	0
1:169494086	G/C	F5	stop_gained	NM_000130.4:c.5777C>G	NP_000121.2:p.Ser1926Ter	2 of 6 Predicted as Damaging	6.636	1	19.211	55											rs752595310	1	PASS	3.9827e-06	1	251086	0	0	113430	0	0	2668	0	0	242	0	0	42050	0	0	11484	0	0	26112	0	0	30874	0	0
1:169494087	A/T	F5	missense_variant	NM_000130.4:c.5776T>A	NP_000121.2:p.Ser1926Thr	6 of 6 Predicted as Damaging	3.505	1	15.4635	26.7											rs1439914613	1	PASS	3.98276e-06	1	251082	0	0	113432	0	0	2668	0	0	242	0	0	42056	0	0	11484	0	0	26112	0	0	30870	0	0
1:169494134	G/A	F5	missense_variant	NM_000130.4:c.5729C>T	NP_000121.2:p.Pro1910Leu	6 of 6 Predicted as Damaging	6.636	1	19.211	32											rs200805004	1	PASS	2.39181e-05	6	250856	0	5	113268	0	0	2668	0	0	242	0	1	41938	0	1	11470	0	0	26112	0	3	30838	0	0
1:169495170	CC/-	F5	frameshift_variant	NM_000130.4:c.5684_5685delGG	NP_000121.2:p.Gly1895Aspfs*13					35											rs1297313985	1	PASS	3.98137e-06	1	251170	0	0	113484	0	0	2668	0	0	242	0	0	42066	0	0	11484	0	0	26128	0	0	30896	0	0
1:169495190	C/T	F5	missense_variant	NM_000130.4:c.5665G>A	NP_000121.2:p.Gly1889Arg	6 of 6 Predicted as Damaging	7.103	1	20.0784	33											rs764069752	1	PASS	7.96394e-06	2	251132	0	0	113472	0	0	2668	0	0	242	0	0	42058	0	0	11482	0	0	26126	0	0	30896	0	1
1:169495193	C/G	F5	missense_variant	NM_000130.4:c.5662G>C	NP_000121.2:p.Val1888Leu	6 of 6 Predicted as Damaging	1.37	1	11.9593	23.3											rs1187761390	1	PASS	3.98178e-06	1	251144	0	1	113482	0	0	2668	0	0	242	0	1	42064	0	0	11482	0	0	26130	0	0	30896	0	0
1:169495234	A/G	F5	missense_variant	NM_000130.4:c.5621T>C	NP_000121.2:p.Met1874Thr	6 of 6 Predicted as Damaging	8.49	1	16.1667	27.1			Uncertain Significance	(1 Stars) Criteria Provided, Single Submitter							rs377129476	1	PASS	8.76487e-05	22	251002	1	16	113376	1	7	2668	1	0	242	0	1	42008	0	2	11474	0	0	26124	0	6	30860	0	3
1:169495249	A/C	F5	missense_variant	NM_000130.4:c.5606T>G	NP_000121.2:p.Phe1869Cys	6 of 6 Predicted as Damaging	6.716	1	16.1667	33											rs1455826563	1	PASS	7.97754e-06	2	250704	0	0	113194	0	0	2668	0	0	242	0	0	41902	0	0	11460	0	0	26118	0	0	30804	0	0
1:169495255	C/T	F5	missense_variant	NM_000130.4:c.5600G>A	NP_000121.2:p.Gly1867Asp	6 of 6 Predicted as Damaging	6.922	1	20.0784	34	0.997772	0.83									rs756675239	1	PASS	7.98473e-06	2	250478	0	0	113104	0	0	2666	0	0	242	0	0	41860	0	0	11444	0	0	26118	0	0	30774	0	0
1:169497162	G/C	F5	missense_variant	NM_000130.4:c.5590C>G	NP_000121.2:p.Leu1864Val	6 of 6 Predicted as Damaging	7.514	1	18.5801	27.8											rs754392946	1	PASS	3.98937e-06	1	250666	0	0	113266	0	0	2668	0	0	238	0	0	41988	0	0	11470	0	0	26052	0	0	30850	0	0
1:169497170	A/C	F5	missense_variant	NM_000130.4:c.5582T>G	NP_000121.2:p.Val1861Gly	6 of 6 Predicted as Damaging	3.882	1	9.1705	25.6											rs1207838382	1	PASS	3.98781e-06	1	250764	0	1	113312	0	0	2666	0	0	242	0	0	42000	0	0	11478	0	0	26062	0	1	30864	0	0
1:169497173	C/T	F5	missense_variant	NM_000130.4:c.5579G>A	NP_000121.2:p.Gly1860Glu	6 of 6 Predicted as Damaging	4.632	0.999	18.5802	27.1											rs750794150	1	PASS	3.98778e-06	1	250766	0	0	113326	0	0	2668	0	0	242	0	0	42006	0	0	11476	0	0	26070	0	0	30864	0	0
1:169497216	C/A	F5	missense_variant	NM_000130.4:c.5536G>T	NP_000121.2:p.Gly1846Cys	6 of 6 Predicted as Damaging	7.397	1	18.5802	33											rs768791906	1	PASS	3.98483e-06	1	250952	0	0	113396	0	0	2668	0	0	242	0	0	42036	0	0	11472	0	0	26092	0	0	30886	0	0
1:169497216	C/T	F5	missense_variant	NM_000130.4:c.5536G>A	NP_000121.2:p.Gly1846Ser	6 of 6 Predicted as Damaging	7.397	1	18.5802	29.7											rs768791906	1	PASS	1.59393e-05	4	250952	0	1	113396	0	0	2668	0	0	242	0	0	42036	0	0	11472	0	1	26092	0	0	30886	0	0
1:169497218	T/C	F5	missense_variant	NM_000130.4:c.5534A>G	NP_000121.2:p.His1845Arg	6 of 6 Predicted as Damaging	7.605	1	14.9407	26.2			Uncertain Significance	(1 Stars) Criteria Provided, Single Submitter,(1 Stars) Criteria Provided, Single Submitter,(1 Stars) Criteria Provided, Single Submitter,(1 Stars) Criteria Provided, Single Submitter							rs200865371	1	PASS	7.57044e-05	19	250976	0	12	113410	0	1	2668	0	0	242	0	4	42038	0	1	11472	0	0	26102	0	6	30888	0	0
1:169497276	C/T	F5	missense_variant	NM_000130.4:c.5476G>A	NP_000121.2:p.Val1826Met	6 of 6 Predicted as Damaging	7.415	1	17.6233	27.9											rs767086839	1	PASS	3.98444e-06	1	250976	0	1	113364	0	0	2668	0	0	242	0	0	42000	0	0	11474	0	1	26124	0	0	30856	0	0
1:169497292	C/T	F5	missense_variant	NM_000130.4:c.5460G>A	NP_000121.2:p.Met1820Ile	6 of 6 Predicted as Damaging	4.519	1	17.6233	24.8			Likely Benign	(1 Stars) Criteria Provided, Single Submitter,(1 Stars) Criteria Provided, Single Submitter,(1 Stars) Criteria Provided, Single Submitter,(1 Stars) Criteria Provided, Single Submitter							rs6026	1	PASS	0.00209218	525	250934	6	22	113336	0	0	2668	0	0	242	0	7	41968	0	11	11476	0	0	26126	0	4	30856	0	442
1:169497299	A/-	F5	frameshift_variant	NM_000130.4:c.5453delT	NP_000121.2:p.Leu1818Argfs*9					35											rs750012108	1	PASS	7.9701e-06	2	250938	0	0	113326	0	0	2668	0	0	242	0	0	41974	0	0	11470	0	0	26124	0	0	30848	0	0
1:169497307	C/A	F5	missense_variant	NM_000130.4:c.5445G>T	NP_000121.2:p.Leu1815Phe	6 of 6 Predicted as Damaging	4.47	1	17.6233	24.8											rs758837114	1	PASS	7.97175e-06	2	250886	0	2	113286	0	0	2668	0	0	242	0	0	41958	0	0	11464	0	2	26120	0	0	30834	0	0
1:169497318	T/A	F5	missense_variant	NM_000130.4:c.5434A>T	NP_000121.2:p.Ile1812Phe	6 of 6 Predicted as Damaging	3.131	1	6.5098	25.6											rs751826388	1	PASS	3.98657e-06	1	250842	0	0	113256	0	0	2668	0	0	242	0	0	41944	0	0	11460	0	0	26118	0	0	30824	0	0
1:169498846	C/G	F5	missense_variant	NM_000130.4:c.5419G>C	NP_000121.2:p.Ala1807Pro	6 of 6 Predicted as Damaging	3.239	1	17.9836	34	0.999985	0.994									rs767263473	1	PASS	3.98692e-06	1	250820	0	0	113336	0	0	2668	0	0	240	0	0	42028	0	0	11472	0	0	26082	0	0	30846	0	0
1:169498862	-/T	F5	frameshift_variant	NM_000130.4:c.5403dupA	NP_000121.2:p.Ser1802Ilefs*3					33			Likely Pathogenic	(1 Stars) Criteria Provided, Single Submitter							rs757917115	1	PASS	7.96965e-06	2	250952	0	2	113416	0	0	2668	0	0	240	0	0	42050	0	0	11484	0	2	26098	0	0	30876	0	0
1:169498889	C/T	F5	stop_gained	NM_000130.4:c.5376G>A	NP_000121.2:p.Trp1792Ter	2 of 6 Predicted as Damaging	2.586	0.929	13.5903	43											rs751835098	1	PASS	7.9661e-06	2	251064	0	0	113468	0	0	2668	0	0	240	0	0	42064	0	0	11486	0	0	26116	0	0	30894	0	0
1:169498890	C/T	F5	stop_gained	NM_000130.4:c.5375G>A	NP_000121.2:p.Trp1792Ter	2 of 6 Predicted as Damaging	2.503	0.924	13.0035	41											rs529951053	1	PASS	7.96629e-06	2	251058	0	1	113466	0	0	2668	0	0	240	0	0	42066	0	1	11482	0	0	26118	0	0	30892	0	0
1:169498900	G/A	F5	stop_gained	NM_000130.4:c.5365C>T	NP_000121.2:p.Arg1789Ter	1 of 6 Predicted as Damaging	0.085	0.001	9.3745	36			Pathogenic	(1 Stars) Criteria Provided, Single Submitter							rs201790842	1	PASS	7.96648e-06	2	251052	0	0	113464	0	0	2668	0	0	240	0	0	42052	0	0	11482	0	0	26120	0	0	30902	0	0
1:169498918	A/T	F5	missense_variant	NM_000130.4:c.5347T>A	NP_000121.2:p.Tyr1783Asn	6 of 6 Predicted as Damaging	6.933	1	15.2799	28.7											rs529796831	1	PASS	3.98298e-06	1	251068	0	1	113446	0	0	2668	0	0	240	0	1	42054	0	0	11482	0	0	26118	0	0	30884	0	0
1:169498919	C/T	F5	stop_gained	NM_000130.4:c.5346G>A	NP_000121.2:p.Trp1782Ter	2 of 6 Predicted as Damaging	7.274	1	18.9954	52											rs757157034	1	PASS	3.98295e-06	1	251070	0	0	113448	0	0	2668	0	0	240	0	0	42054	0	0	11480	0	0	26120	0	0	30886	0	0
1:169498935	-/T	F5	frameshift_variant	NM_000130.4:c.5330dupA	NP_000121.2:p.Asp1777Glufs*2					35											rs1464746280	1	PASS	3.98321e-06	1	251054	0	1	113432	0	0	2668	0	0	240	0	1	42042	0	0	11488	0	0	26118	0	0	30876	0	0
1:169498939	A/T	F5	missense_variant	NM_000130.4:c.5326T>A	NP_000121.2:p.Phe1776Ile	6 of 6 Predicted as Damaging	8.7	1	15.2799	29.7											rs548238043	1	PASS	7.96622e-06	2	251060	0	0	113432	0	0	2668	0	0	240	0	0	42036	0	0	11488	0	0	26124	0	0	30876	0	0
1:169498946	-/A	F5	frameshift_variant	NM_000130.4:c.5319dupT	NP_000121.2:p.Met1774Tyrfs*4					35											rs1181731657	1	PASS	3.98394e-06	1	251008	0	1	113386	0	0	2666	0	0	240	0	0	42010	0	0	11486	0	0	26118	0	1	30866	0	0
1:169499004	C/-	F5	frameshift_variant	NM_000130.4:c.5261delG	NP_000121.2:p.Gly1754Glufs*13					35											rs1030984228	1	PASS	3.98785e-06	1	250762	0	1	113156	0	0	2668	0	0	240	0	1	41876	0	0	11464	0	0	26124	0	0	30784	0	0
1:169499004	C/T	F5	missense_variant	NM_000130.4:c.5261G>A	NP_000121.2:p.Gly1754Glu	6 of 6 Predicted as Damaging	5.554	1	19.3971	28.9											rs767869864	1	PASS	1.59523e-05	4	250748	0	3	113144	0	1	2668	0	0	240	0	0	41872	0	2	11466	0	0	26122	0	0	30776	0	0
1:169499011	G/A	F5	stop_gained	NM_000130.4:c.5254C>T	NP_000121.2:p.Gln1752Ter	2 of 6 Predicted as Damaging	1.461	0.941	11.0304	48											rs1235160944	1	PASS	3.98912e-06	1	250682	0	1	113094	0	0	2668	0	0	240	0	1	41848	0	0	11454	0	0	26124	0	0	30760	0	0
1:169499019	A/T	F5	missense_variant	NM_000130.4:c.5246T>A	NP_000121.2:p.Leu1749Gln	6 of 6 Predicted as Damaging	8.7	0.998	15.6079	28											rs1286743360	1	PASS	3.99017e-06	1	250616	0	0	113038	0	0	2668	0	0	240	0	0	41818	0	0	11452	0	0	26124	0	0	30736	0	0
1:169499026	G/A	F5	missense_variant	NM_000130.4:c.5239C>T	NP_000121.2:p.Pro1747Ser	6 of 6 Predicted as Damaging	9.197	1	19.3971	27.5											rs764200671	1	PASS	3.99179e-06	1	250514	0	0	112968	0	0	2668	0	0	238	0	0	41782	0	0	11444	0	0	26124	0	0	30712	0	0
1:169499034	A/G	F5	missense_variant	NM_000130.4:c.5231T>C	NP_000121.2:p.Leu1744Ser	6 of 6 Predicted as Damaging	8.7	1	15.6079	28.9											rs570184152	1	PASS	3.99275e-06	1	250454	0	0	112902	0	0	2668	0	0	238	0	0	41752	0	0	11442	0	0	26120	0	0	30682	0	1
1:169499049	T/C	F5	missense_variant	NM_000130.4:c.5216A>G	NP_000121.2:p.Asp1739Gly	6 of 6 Predicted as Damaging	7.478	1	15.6079	31											rs757244704	1	PASS	3.99907e-06	1	250058	0	1	112592	0	0	2664	0	0	238	0	0	41596	0	0	11418	0	1	26108	0	0	30568	0	0
1:169499050	C/T	F5	missense_variant	NM_000130.4:c.5215G>A	NP_000121.2:p.Asp1739Asn	6 of 6 Predicted as Damaging	7.274	1	19.3971	32											rs778710537	1	PASS	1.20004e-05	3	249992	0	3	112554	0	0	2664	0	0	236	0	1	41572	0	0	11416	0	1	26110	0	1	30556	0	0
1:169499058	T/C	F5	splice_acceptor_variant	NM_000130.4:c.5209-2A>G		2 of 6 Predicted as Damaging	7.478	1	15.6079	33	0.999988	0.926									rs1410859141	1	PASS	4.00445e-06	1	249722	0	1	112378	0	0	2664	0	0	236	0	1	41496	0	0	11392	0	0	26104	0	0	30486	0	0
1:169500032	C/A	F5	missense_variant	NM_000130.4:c.5200G>T	NP_000121.2:p.Val1734Leu	6 of 6 Predicted as Damaging	4.645	1	14.8697	24.1											rs751374985	1	PASS	3.98785e-06	1	250762	0	1	113150	0	0	2666	0	0	242	0	1	41878	0	0	11456	0	0	26116	0	0	30792	0	0
1:169500032	C/T	F5	missense_variant	NM_000130.4:c.5200G>A	NP_000121.2:p.Val1734Met	6 of 6 Predicted as Damaging	4.645	1	14.8697	26.8											rs751374985	1	PASS	3.98785e-06	1	250762	0	0	113150	0	0	2666	0	0	242	0	0	41878	0	0	11456	0	0	26116	0	0	30792	0	1
1:169500067	C/A	F5	missense_variant	NM_000130.4:c.5165G>T	NP_000121.2:p.Gly1722Val	6 of 6 Predicted as Damaging	3.431	0.998	13.6492	27											rs555617221	1	PASS	3.98781e-06	1	250764	0	1	113154	0	0	2668	0	0	242	0	0	41878	0	0	11456	0	0	26124	0	1	30786	0	0
1:169500083	C/T	F5	missense_variant	NM_000130.4:c.5149G>A	NP_000121.2:p.Gly1717Arg	6 of 6 Predicted as Damaging	7.4	1	19.3886	27											rs376296101	1	PASS	7.97505e-06	2	250782	0	0	113174	0	0	2668	0	0	242	0	0	41884	0	0	11462	0	0	26122	0	0	30796	0	2
1:169500089	G/A	F5	stop_gained	NM_000130.4:c.5143C>T	NP_000121.2:p.Arg1715Ter	1 of 6 Predicted as Damaging	1.159	0.002	14.943	35											rs746405100	1	PASS	7.9748e-06	2	250790	0	0	113178	0	0	2668	0	0	242	0	0	41888	0	0	11458	0	0	26122	0	0	30800	0	2
1:169500110	A/G	F5	missense_variant	NM_000130.4:c.5122T>C	NP_000121.2:p.Tyr1708His	6 of 6 Predicted as Damaging	8.854	1	15.604	26.2											rs1557910232	1	PASS	3.98708e-06	1	250810	0	1	113180	0	0	2668	0	0	242	0	0	41888	0	0	11454	0	0	26128	0	1	30800	0	0
1:169500111	GG/-	F5	frameshift_variant	NM_000130.4:c.5120_5121delCC	NP_000121.2:p.Thr1707Ilefs*7					35											rs779490602	1	PASS	3.98708e-06	1	250810	0	1	113180	0	0	2668	0	0	242	0	0	41888	0	0	11454	0	0	26128	0	1	30800	0	0
1:169500118	C/-	F5	frameshift_variant	NM_000130.4:c.5114delG	NP_000121.2:p.Ser1705Ilefs*30					26.3											rs1388922158	1	PASS	3.98708e-06	1	250810	0	0	113176	0	0	2668	0	0	242	0	0	41882	0	0	11454	0	0	26124	0	0	30806	0	0
1:169500133	A/G	F5	missense_variant	NM_000130.4:c.5099T>C	NP_000121.2:p.Val1700Ala	6 of 6 Predicted as Damaging	8.854	0.996	15.3473	25											rs761972125	1	PASS	3.98727e-06	1	250798	0	1	113164	0	0	2668	0	0	242	0	0	41890	0	0	11454	0	0	26124	0	1	30786	0	0
1:169500139	-/T	F5	frameshift_variant	NM_000130.4:c.5093dupA	NP_000121.2:p.Asn1698Lysfs*7					34											rs1354967271	1	PASS	3.98702e-06	1	250814	0	1	113176	0	0	2668	0	0	242	0	1	41892	0	0	11454	0	0	26126	0	0	30794	0	0
1:169500176	A/-	F5	frameshift_variant	NM_000130.4:c.5056delT	NP_000121.2:p.Tyr1686Metfs*49					35											rs746978299	1	PASS	3.98753e-06	1	250782	0	1	113168	0	0	2668	0	0	242	0	0	41886	0	0	11458	0	0	26126	0	1	30788	0	0
1:169500187	T/G	F5	missense_variant	NM_000130.4:c.5045A>C	NP_000121.2:p.Glu1682Ala	6 of 6 Predicted as Damaging	7.609	1	15.3473	24.9											rs751462892	1	PASS	3.98823e-06	1	250738	0	0	113136	0	0	2668	0	0	242	0	0	41878	0	0	11454	0	0	26124	0	0	30770	0	0
1:169500202	T/C	F5	missense_variant	NM_000130.4:c.5030A>G	NP_000121.2:p.Tyr1677Cys	6 of 6 Predicted as Damaging	4.599	1	15.3473	29.5											rs752431648	1	PASS	1.19653e-05	3	250724	0	2	113146	0	0	2668	0	0	240	0	0	41878	0	0	11458	0	1	26120	0	1	30782	0	0
1:169500208	A/G	F5	missense_variant	NM_000130.4:c.5024T>C	NP_000121.2:p.Leu1675Pro	6 of 6 Predicted as Damaging	8.893	1	15.604	29.8											rs777199135	1	PASS	7.97709e-06	2	250718	0	1	113154	0	0	2668	0	0	240	0	0	41882	0	0	11454	0	1	26120	0	0	30790	0	0
1:169500211	C/-	F5	frameshift_variant	NM_000130.4:c.5021delG	NP_000121.2:p.Gly1674Aspfs*61					35											rs1557910347	1	PASS	3.9896e-06	1	250652	0	0	113140	0	0	2668	0	0	240	0	0	41872	0	0	11454	0	0	26116	0	0	30790	0	0
1:169500214	T/C	F5	missense_variant	NM_000130.4:c.5018A>G	NP_000121.2:p.His1673Arg	6 of 6 Predicted as Damaging	7.641	1	15.604	25.8											rs1233341681	1	PASS	3.98947e-06	1	250660	0	0	113130	0	0	2668	0	0	240	0	0	41868	0	0	11454	0	0	26110	0	0	30790	0	0
1:169500218	C/T	F5	missense_variant	NM_000130.4:c.5014G>A	NP_000121.2:p.Ala1672Thr	6 of 6 Predicted as Damaging	3.903	1	8.8261	22.5											rs1294790083	1	PASS	3.98985e-06	1	250636	0	1	113124	0	0	2666	0	0	240	0	1	41874	0	0	11460	0	0	26110	0	0	30774	0	0
1:169500220	T/C	F5	missense_variant	NM_000130.4:c.5012A>G	NP_000121.2:p.His1671Arg	6 of 6 Predicted as Damaging	7.641	1	15.604	25.9											rs1326641450	1	PASS	3.98991e-06	1	250632	0	0	113136	0	0	2666	0	0	240	0	0	41876	0	0	11454	0	0	26114	0	0	30786	0	0
1:169500227	A/G	F5	missense_variant	NM_000130.4:c.5005T>C	NP_000121.2:p.Ser1669Pro	6 of 6 Predicted as Damaging	8.893	1	15.604	28.1											rs1261109995	1	PASS	7.98206e-06	2	250562	0	0	113142	0	0	2668	0	0	240	0	0	41896	0	0	11456	0	0	26110	0	0	30772	0	0
1:169500232	G/A	F5	missense_variant	NM_000130.4:c.5000C>T	NP_000121.2:p.Pro1667Leu	6 of 6 Predicted as Damaging	7.54	1	19.3886	31											rs200157005	1	PASS	6.79234e-05	17	250282	0	2	113088	0	0	2666	0	0	240	0	1	41860	0	0	11446	0	1	26110	0	0	30766	0	1
1:169500244	A/-	F5	stop_gained	NM_000130.4:c.4988delT	NP_000121.2:p.Leu1663Terfs					35											rs1557910392	1	PASS	8.00814e-06	2	249746	0	2	113004	0	0	2668	0	0	238	0	1	41816	0	0	11454	0	0	26106	0	1	30722	0	0
1:169505748	A/G	F5	missense_variant	NM_000130.4:c.4967T>C	NP_000121.2:p.Ile1656Thr	6 of 6 Predicted as Damaging	8.808	1	14.7474	27.7											rs1435903927	1	PASS	3.9853e-06	1	250922	0	1	113402	0	0	2668	0	0	242	0	1	42056	0	0	11482	0	0	26080	0	0	30874	0	0
1:169505755	C/G	F5	missense_variant	NM_000130.4:c.4960G>C	NP_000121.2:p.Asp1654His	6 of 6 Predicted as Damaging	3.783	1	18.6695	29.1											rs755444793	1	PASS	3.98492e-06	1	250946	0	0	113414	0	0	2668	0	0	242	0	0	42060	0	0	11480	0	0	26088	0	0	30876	0	1
1:169505760	A/G	F5	missense_variant	NM_000130.4:c.4955T>C	NP_000121.2:p.Val1652Ala	6 of 6 Predicted as Damaging	8.808	1	15.0115	28.5											rs781582281	1	PASS	3.98356e-06	1	251032	0	1	113460	0	0	2668	0	0	242	0	0	42074	0	1	11480	0	0	26098	0	0	30898	0	0
1:169505766	G/A	F5	missense_variant	NM_000130.4:c.4949C>T	NP_000121.2:p.Ala1650Val	6 of 6 Predicted as Damaging	9.312	1	18.6695	29.4											rs753691316	1	PASS	7.17097e-05	18	251012	0	0	113444	0	0	2668	0	0	242	0	0	42056	0	0	11482	0	0	26094	0	0	30902	0	0
1:169505768	T/A	F5	missense_variant	NM_000130.4:c.4947A>T	NP_000121.2:p.Arg1649Ser	6 of 6 Predicted as Damaging	-0.008	0.958	5.4072	24.6											rs769973165	1	PASS	3.98283e-06	1	251078	0	0	113492	0	0	2668	0	0	242	0	0	42080	0	0	11488	0	0	26110	0	0	30904	0	0
1:169505769	C/G	F5	missense_variant	NM_000130.4:c.4946G>C	NP_000121.2:p.Arg1649Thr	6 of 6 Predicted as Damaging	2.941	1	15.2832	25.5											rs773484741	1	PASS	1.19485e-05	3	251078	0	3	113498	0	0	2668	0	0	242	0	0	42084	0	0	11486	0	3	26110	0	0	30908	0	0
1:169505773	T/A	F5	missense_variant	NM_000130.4:c.4942A>T	NP_000121.2:p.Ile1648Phe	6 of 6 Predicted as Damaging	5.83	1	15.0115	27.2											rs749425147	1	PASS	3.98235e-06	1	251108	0	1	113522	0	1	2668	0	0	242	0	0	42098	0	0	11488	0	0	26112	0	0	30914	0	0
1:169505773	T/C	F5	missense_variant	NM_000130.4:c.4942A>G	NP_000121.2:p.Ile1648Val	6 of 6 Predicted as Damaging	5.83	1	15.0115	25.1											rs749425147	1	PASS	3.98235e-06	1	251108	0	1	113522	0	0	2668	0	0	242	0	1	42098	0	0	11488	0	0	26112	0	0	30914	0	0
1:169505790	C/A	F5	missense_variant	NM_000130.4:c.4925G>T	NP_000121.2:p.Gly1642Val	6 of 6 Predicted as Damaging	7.363	1	18.385	28.2											rs774544550	1	PASS	3.98235e-06	1	251108	0	1	113514	0	0	2668	0	0	242	0	0	42088	0	1	11488	0	0	26114	0	0	30914	0	0
1:169505791	C/T	F5	missense_variant	NM_000130.4:c.4924G>A	NP_000121.2:p.Gly1642Arg	6 of 6 Predicted as Damaging	7.363	1	18.6695	32											rs866997995	1	PASS	1.19461e-05	3	251128	0	0	113538	0	0	2668	0	0	242	0	0	42102	0	0	11486	0	0	26116	0	0	30924	0	0
1:169505796	TG/-	F5	frameshift_variant	NM_000130.4:c.4918_4919delCA	NP_000121.2:p.His1640Serfs*11					35											rs1557912520	1	PASS	3.98194e-06	1	251134	0	0	113540	0	0	2668	0	0	242	0	0	42106	0	0	11486	0	0	26118	0	0	30920	0	0
1:169505799	T/C	F5	missense_variant	NM_000130.4:c.4916A>G	NP_000121.2:p.Glu1639Gly	6 of 6 Predicted as Damaging	4.747	1	12.2071	24.4											rs1252175050	1	PASS	3.98168e-06	1	251150	0	1	113554	0	0	2668	0	0	242	0	1	42116	0	0	11490	0	0	26118	0	0	30920	0	0
1:169505839	T/-	F5	frameshift_variant	NM_000130.4:c.4876delA	NP_000121.2:p.Ser1626Alafs*38					35											rs748030997	1	PASS	1.59311e-05	4	251082	0	0	113488	0	0	2668	0	0	242	0	0	42088	0	0	11482	0	0	26112	0	0	30896	0	0
1:169505842	C/T	F5	missense_variant	NM_000130.4:c.4873G>A	NP_000121.2:p.Asp1625Asn	6 of 6 Predicted as Damaging	7.363	1	18.6695	31											rs914900338	1	PASS	3.98276e-06	1	251082	0	1	113482	0	0	2668	0	0	242	0	1	42086	0	0	11480	0	0	26108	0	0	30898	0	0
1:169505871	T/C	F5	missense_variant	NM_000130.4:c.4844A>G	NP_000121.2:p.Tyr1615Cys	6 of 6 Predicted as Damaging	2.354	0.98	13.9924	25.6											rs755533777	1	PASS	1.99254e-05	5	250936	0	5	113374	0	2	2668	0	0	242	0	0	42024	0	0	11478	0	0	26100	0	3	30862	0	0
1:169509546	TGAATAATCCCAGGATATTTCTTCAGCAGCAA/-	F5	frameshift_variant	NM_000130.4:c.4751_4782del	NP_000121.2:p.Ile1584Argfs*10					36											rs769467149	1	PASS	3.98842e-06	1	250726	0	1	113224	0	0	2668	0	0	242	0	0	41938	0	0	11462	0	0	26106	0	1	30808	0	0
1:169509578	T/G	F5	missense_variant	NM_000130.4:c.4750A>C	NP_000121.2:p.Ile1584Leu	6 of 6 Predicted as Damaging	7.038	1	15.9666	24.3											rs746032307	1	PASS	3.58703e-05	9	250904	0	8	113364	0	0	2668	0	0	242	0	5	42020	0	0	11464	0	0	26116	0	3	30854	0	0
1:169509830	CATTGAGA/-	F5	frameshift_variant	NM_000130.4:c.4491_4498delTCTCAATG	NP_000121.2:p.Leu1498Tyrfs*8					28.8											rs1557914291	1	PASS	3.98953e-06	1	250656	0	0	113132	0	0	2668	0	0	242	0	0	41916	0	0	11448	0	0	26078	0	0	30780	0	0
1:169510185	CTGA/-	F5	frameshift_variant	NM_000130.4:c.4140_4143delTCAG	NP_000121.2:p.Ser1380Argfs*29					24.5											rs749476605	1	PASS	7.96369e-06	2	251140	0	2	113490	0	0	2668	0	0	242	0	1	42084	0	1	11482	0	0	26130	0	0	30884	0	0
1:169510286	G/-	F5	frameshift_variant	NM_000130.4:c.4042delC	NP_000121.2:p.Leu1348Phefs*21					18.58											rs771170598	1	PASS	3.97905e-06	1	251316	0	0	113626	0	0	2668	0	0	242	0	0	42156	0	0	11490	0	0	26132	0	0	30938	0	0
1:169510294	TGAC/-	F5	frameshift_variant	NM_000130.4:c.4031_4034delGTCA	NP_000121.2:p.Ser1344Lysfs*24					23.4											rs1557914802	1	PASS	8.90567e-06	2	224576	0	0	105362	0	0	2664	0	0	228	0	0	35750	0	0	11452	0	0	26080	0	0	29188	0	0
1:169510538	G/A	F5	stop_gained	NM_000130.4:c.3790C>T	NP_000121.2:p.Gln1264Ter	1 of 6 Predicted as Damaging	-0.35		8.9264	35											rs749474445	1	PASS	3.97928e-06	1	251302	0	0	113656	0	0	2668	0	0	242	0	0	42150	0	0	11496	0	0	26134	0	0	30966	0	0
1:169510682	C/A	F5	stop_gained	NM_000130.4:c.3646G>T	NP_000121.2:p.Glu1216Ter	1 of 6 Predicted as Damaging	1.696	0.03	11.025	35											rs1267208797	1	PASS	3.97912e-06	1	251312	0	0	113622	0	0	2668	0	0	242	0	0	42150	0	0	11490	0	0	26130	0	0	30942	0	0
1:169511160	G/T	F5	stop_gained	NM_000130.4:c.3168C>A	NP_000121.2:p.Tyr1056Ter	1 of 6 Predicted as Damaging	-0.431		12.7018	33											rs1218328927	1	PASS	3.98194e-06	1	251134	0	1	113478	0	0	2668	0	0	240	0	0	42068	0	0	11482	0	0	26130	0	1	30890	0	0
1:169511224	TCTTTTT/-	F5	frameshift_variant	NM_000130.4:c.3098_3104delAAAAAGA	NP_000121.2:p.Lys1033Argfs*17					31											rs1557915773	1	PASS	3.98753e-06	1	250782	0	1	113212	0	0	2668	0	0	242	0	1	41898	0	0	11478	0	0	26126	0	0	30800	0	0
1:169511316	A/-	F5	frameshift_variant	NM_000130.4:c.3012delT	NP_000121.2:p.Arg1005Aspfs*7					20.8											rs764308355	1	PASS	3.97947e-06	1	251290	0	0	113618	0	0	2668	0	0	242	0	0	42148	0	0	11482	0	0	26132	0	0	30946	0	1
1:169511345	G/A	F5	stop_gained	NM_000130.4:c.2983C>T	NP_000121.2:p.Gln995Ter	1 of 6 Predicted as Damaging	2.107	0.016	14.5282	36											rs763558856	1	PASS	3.98013e-06	1	251248	0	0	113614	0	0	2668	0	0	242	0	0	42140	0	0	11490	0	0	26132	0	0	30942	0	0
1:169511482	A/-	F5	frameshift_variant	NM_000130.4:c.2846delT	NP_000121.2:p.Leu949Trpfs*10					32											rs751117808	1	PASS	3.98184e-06	1	251140	0	0	113498	0	0	2668	0	0	242	0	0	42076	0	0	11486	0	0	26128	0	0	30898	0	0
1:169511608	C/T	F5	stop_gained	NM_000130.4:c.2720G>A	NP_000121.2:p.Trp907Ter	1 of 6 Predicted as Damaging	-0.27		4.5699	35											rs1393213631	1	PASS	3.98511e-06	1	250934	0	0	113304	0	0	2668	0	0	242	0	0	41950	0	0	11466	0	0	26132	0	0	30846	0	0
1:169511682	C/T	F5	stop_gained	NM_000130.4:c.2646G>A	NP_000121.2:p.Trp882Ter	1 of 6 Predicted as Damaging	-0.034		9.2901	36											rs754043375	1	PASS	3.99109e-06	1	250558	0	1	112974	0	0	2666	0	0	242	0	1	41782	0	0	11436	0	0	26130	0	0	30718	0	0
1:169511727	TCCCT/-	F5	frameshift_variant	NM_000130.4:c.2597_2601delAGGGA	NP_000121.2:p.Lys866Thrfs*22					23.4											rs1186905730	1	PASS	3.98791e-06	1	250758	0	1	113154	0	0	2666	0	0	242	0	1	41896	0	0	11448	0	0	26130	0	0	30772	0	0
1:169511803	G/-	F5	frameshift_variant	NM_000130.4:c.2525delC	NP_000121.2:p.Pro842Glnfs*29					24.3											rs1283191786	1	PASS	3.98403e-06	1	251002	0	0	113366	0	0	2668	0	0	242	0	0	42012	0	0	11460	0	0	26128	0	0	30856	0	0
1:169511807	G/-	F5	frameshift_variant	NM_000130.4:c.2521delC	NP_000121.2:p.Gln841Serfs*30					22.4											rs781255484	1	PASS	3.98352e-06	1	251034	0	0	113390	0	0	2668	0	0	242	0	0	42018	0	0	11468	0	0	26128	0	0	30866	0	0
1:169511971	AACTTACT/-	F5	frameshift_variant	NM_000130.4:c.2350_2357delAGTAAGTT	NP_000121.2:p.Ser784Hisfs*4					23.1											rs755947750	1	PASS	3.97975e-06	1	251272	0	0	113610	0	0	2668	0	0	242	0	0	42136	0	0	11494	0	0	26132	0	0	30938	0	0
1:169512100	G/T	F5	stop_gained	NM_000130.4:c.2228C>A	NP_000121.2:p.Ser743Ter	1 of 6 Predicted as Damaging	1.606	0.111	12.2856	41											rs764010406	1	PASS	3.98162e-06	1	251154	0	0	113472	0	0	2668	0	0	242	0	0	42066	0	0	11484	0	0	26128	0	0	30884	0	0
1:169512176	C/A	F5	stop_gained	NM_000130.4:c.2152G>T	NP_000121.2:p.Glu718Ter	1 of 6 Predicted as Damaging	1.023	0.001	6.4667	36											rs1282329517	1	PASS	3.98267e-06	1	251088	0	1	113408	0	0	2668	0	0	242	0	0	42022	0	0	11480	0	0	26128	0	1	30868	0	0
1:169512249	A/C	F5	stop_gained	NM_000130.4:c.2079T>G	NP_000121.2:p.Tyr693Ter	2 of 6 Predicted as Damaging	1.241	0.999	8.6719	43											rs754302727	1	PASS	7.97588e-06	2	250756	0	0	113110	0	0	2668	0	0	242	0	0	41866	0	0	11456	0	0	26122	0	0	30756	0	2
1:169512304	A/G	F5	missense_variant	NM_000130.4:c.2024T>C	NP_000121.2:p.Leu675Pro	6 of 6 Predicted as Damaging	7.281	0.996	16.1312	24.7											rs772867185	1	PASS	7.99444e-06	2	250174	0	2	112690	0	0	2666	0	0	242	0	0	41614	0	0	11432	0	2	26116	0	0	30620	0	0
1:169512347	A/C	F5	missense_variant	NM_000130.4:c.1981T>G	NP_000121.2:p.Trp661Gly	6 of 6 Predicted as Damaging	7.281	1	16.1312	29.1											rs758735323	1	PASS	4.02185e-06	1	248642	0	1	112136	0	0	2658	0	0	238	0	0	41236	0	0	11414	0	1	26102	0	0	30488	0	0
1:169513534	C/T	F5	missense_variant	NM_000130.4:c.1975G>A	NP_000121.2:p.Gly659Arg	6 of 6 Predicted as Damaging	7.411	1	19.8807	35	0.999991	1	Uncertain Significance	(1 Stars) Criteria Provided, Single Submitter							rs759167620	1	PASS	3.98521e-06	1	250928	0	1	113378	0	0	2670	0	0	240	0	1	42022	0	0	11472	0	0	26100	0	0	30874	0	0
1:169513534	C/G	F5	missense_variant	NM_000130.4:c.1975G>C	NP_000121.2:p.Gly659Arg	6 of 6 Predicted as Damaging	7.411	1	19.8807	35	0.999953	0.982									rs759167620	1	PASS	3.98521e-06	1	250928	0	1	113378	0	0	2670	0	0	240	0	0	42022	0	1	11472	0	0	26100	0	0	30874	0	0
1:169513540	T/C	F5	missense_variant	NM_000130.4:c.1969A>G	NP_000121.2:p.Asn657Asp	6 of 6 Predicted as Damaging	5.897	1	16.0034	28.5											rs1219877218	1	PASS	3.9834e-06	1	251042	0	0	113450	0	0	2670	0	0	242	0	0	42052	0	0	11484	0	0	26112	0	0	30890	0	0
1:169513572	A/G	F5	missense_variant	NM_000130.4:c.1937T>C	NP_000121.2:p.Met646Thr	6 of 6 Predicted as Damaging	8.868	1	16.0034	26.7											rs1557917437	1	PASS	3.98083e-06	1	251204	0	1	113550	0	0	2670	0	0	242	0	1	42112	0	0	11496	0	0	26118	0	0	30912	0	0
1:169513596	-/T	F5	frameshift_variant	NM_000130.4:c.1913dupA	NP_000121.2:p.Asp639Glyfs*19					34											rs1360255981	1	PASS	3.98051e-06	1	251224	0	0	113580	0	0	2668	0	0	242	0	0	42122	0	0	11494	0	0	26118	0	0	30936	0	0
1:169513611	T/C	F5	missense_variant	NM_000130.4:c.1898A>G	NP_000121.2:p.Tyr633Cys	6 of 6 Predicted as Damaging	4.031	1	11.2637	27.5											rs775062519	1	PASS	3.18487e-05	8	251188	0	2	113558	0	0	2668	0	0	242	0	1	42122	0	1	11498	0	0	26116	0	0	30912	0	0
1:169513640	G/-	F5	frameshift_variant	NM_000130.4:c.1869delC	NP_000121.2:p.Ile624Serfs*18					33											rs776079013	1	PASS	3.98124e-06	1	251178	0	1	113556	0	0	2668	0	0	242	0	1	42130	0	0	11494	0	0	26106	0	0	30916	0	0
1:169513641	G/T	F5	missense_variant	NM_000130.4:c.1868C>A	NP_000121.2:p.Thr623Asn	6 of 6 Predicted as Damaging	3.762	0.996	10.5545	25.1											rs375755399	1	PASS	7.96273e-06	2	251170	0	1	113546	0	0	2668	0	0	242	0	1	42114	0	0	11494	0	0	26108	0	0	30920	0	0
1:169513651	C/A	F5	stop_gained	NM_000130.4:c.1858G>T	NP_000121.2:p.Glu620Ter	2 of 6 Predicted as Damaging	2.423	1	14.3418	40											rs1384648581	1	PASS	3.98175e-06	1	251146	0	1	113530	0	0	2668	0	0	242	0	0	42096	0	0	11488	0	0	26110	0	1	30926	0	0
1:169513663	C/G	F5	missense_variant	NM_000130.4:c.1846G>C	NP_000121.2:p.Gly616Arg	6 of 6 Predicted as Damaging	7.411	1	20.1162	31											rs752920096	1	PASS	3.9827e-06	1	251086	0	1	113490	0	0	2668	0	0	242	0	1	42084	0	0	11478	0	0	26112	0	0	30906	0	0
1:169513692	T/C	F5	missense_variant	NM_000130.4:c.1817A>G	NP_000121.2:p.Asp606Gly	6 of 6 Predicted as Damaging	2.625	1	13.2179	28.4											rs778647092	1	PASS	3.98352e-06	1	251034	0	0	113444	0	0	2668	0	0	242	0	0	42058	0	0	11478	0	0	26112	0	0	30886	0	0
1:169513737	C/A	F5	missense_variant	NM_000130.4:c.1772G>T	NP_000121.2:p.Gly591Val	6 of 6 Predicted as Damaging	7.38	1	19.5353	29.7											rs369354157	1	PASS	3.99738e-06	1	250164	0	1	112908	0	0	2664	0	0	240	0	1	41772	0	0	11440	0	0	26066	0	0	30726	0	0
1:169515710	G/T	F5	missense_variant	NM_000130.4:c.1732C>A	NP_000121.2:p.Pro578Thr	6 of 6 Predicted as Damaging	6.01	1	15.581	25.9											rs761980727	1	PASS	3.97829e-06	1	251364	0	1	113672	0	0	2668	0	0	242	0	1	42178	0	0	11500	0	0	26128	0	0	30956	0	0
1:169515719	G/A	F5	missense_variant	NM_000130.4:c.1723C>T	NP_000121.2:p.Arg575Cys	6 of 6 Predicted as Damaging	5.32	1	14.3164	31											rs750405124	1	PASS	7.95627e-06	2	251374	0	2	113676	0	0	2668	0	0	242	0	0	42176	0	0	11498	0	0	26132	0	2	30960	0	0
1:169515763	T/C	F5	missense_variant	NM_000130.4:c.1679A>G	NP_000121.2:p.Glu560Gly	6 of 6 Predicted as Damaging	7.52	1	16.8222	32											rs754675252	1	PASS	3.97735e-06	1	251424	0	1	113706	0	0	2668	0	0	242	0	0	42194	0	0	11498	0	0	26134	0	1	30970	0	0
1:169515775	C/T	F5	missense_variant	NM_000130.4:c.1667G>A	NP_000121.2:p.Ser556Asn	6 of 6 Predicted as Damaging	7.346	1	20.8794	28.2											rs747716745	1	PASS	7.95469e-06	2	251424	0	0	113706	0	0	2668	0	0	242	0	0	42188	0	0	11500	0	0	26132	0	0	30976	0	2
1:169515780	G/-	F5	frameshift_variant	NM_000130.4:c.1662delC	NP_000121.2:p.Asn554Lysfs*20					34											rs761037087	1	PASS	3.97735e-06	1	251424	0	0	113706	0	0	2668	0	0	242	0	0	42188	0	0	11502	0	0	26132	0	0	30974	0	0
1:169515793	A/G	F5	missense_variant	NM_000130.4:c.1649T>C	NP_000121.2:p.Val550Ala	6 of 6 Predicted as Damaging	8.791	1	16.8222	27.1											rs746444205	1	PASS	1.59138e-05	4	251354	0	4	113648	0	0	2668	0	0	242	0	2	42150	0	0	11500	0	0	26132	0	2	30956	0	0
1:169515815	C/T	F5	missense_variant	NM_000130.4:c.1627G>A	NP_000121.2:p.Glu543Lys	6 of 6 Predicted as Damaging	7.346	1	20.8794	33											rs768860020	1	PASS	3.98026e-06	1	251240	0	1	113550	0	0	2668	0	0	242	0	1	42088	0	0	11496	0	0	26124	0	0	30932	0	0
1:169515823	G/T	F5	missense_variant	NM_000130.4:c.1619C>A	NP_000121.2:p.Ala540Glu	6 of 6 Predicted as Damaging	9.294	1	20.8794	31											rs761915766	1	PASS	3.98156e-06	1	251158	0	0	113472	0	0	2668	0	0	242	0	0	42038	0	0	11500	0	0	26126	0	0	30898	0	0
1:169519050	G/A	F5	stop_gained	NM_000130.4:c.1600C>T	NP_000121.2:p.Gln534Ter	2 of 6 Predicted as Damaging	1.684	0.973	15.1076	38											rs770011773	1	PASS	7.96197e-06	2	251194	0	0	113608	0	0	2666	0	0	242	0	0	42144	0	0	11488	0	0	26114	0	0	30954	0	0
1:169519051	C/-	F5	frameshift_variant	NM_000130.4:c.1599delG	NP_000121.2:p.Arg533Serfs*41					23.5											rs1557920079	1	PASS	3.98099e-06	1	251194	0	0	113608	0	0	2666	0	0	242	0	0	42144	0	0	11488	0	0	26114	0	0	30954	0	0
1:169519073	C/T	F5	missense_variant	NM_000130.4:c.1577G>A	NP_000121.2:p.Cys526Tyr	6 of 6 Predicted as Damaging	7.451	1	19.8398	28.7											rs773367113	1	PASS	3.97845e-06	1	251354	0	0	113686	0	0	2668	0	0	242	0	0	42172	0	0	11500	0	0	26130	0	0	30974	0	1
1:169519104	C/T	F5	missense_variant	NM_000130.4:c.1546G>A	NP_000121.2:p.Ala516Thr	6 of 6 Predicted as Damaging	7.451	1	19.8398	29											rs916286148	1	PASS	3.97763e-06	1	251406	0	1	113716	0	0	2670	0	0	242	0	1	42188	0	0	11500	0	0	26130	0	0	30986	0	0
1:169519109	T/C	F5	missense_variant	NM_000130.4:c.1541A>G	NP_000121.2:p.Asp514Gly	6 of 6 Predicted as Damaging	7.661	1	15.9668	29											rs1342514609	1	PASS	3.97731e-06	1	251426	0	1	113726	0	0	2670	0	0	242	0	0	42192	0	0	11502	0	0	26130	0	1	30990	0	0
1:169519124	A/G	F5	missense_variant	NM_000130.4:c.1526T>C	NP_000121.2:p.Val509Ala	6 of 6 Predicted as Damaging	8.917	1	15.9668	27.2											rs1230842743	1	PASS	7.95545e-06	2	251400	0	0	113716	0	0	2670	0	0	242	0	0	42192	0	0	11502	0	0	26130	0	0	30980	0	0
1:169519125	C/T	F5	missense_variant	NM_000130.4:c.1525G>A	NP_000121.2:p.Val509Met	6 of 6 Predicted as Damaging	7.451	1	19.8398	28.5											rs894933282	1	PASS	3.97766e-06	1	251404	0	0	113722	0	0	2670	0	0	242	0	0	42194	0	0	11500	0	0	26130	0	0	30986	0	0
1:169519129	A/T	F5	missense_variant	NM_000130.4:c.1521T>A	NP_000121.2:p.Ser507Arg	6 of 6 Predicted as Damaging	0.889	0.996	8.9871	24.3											rs752438368	1	PASS	3.97725e-06	1	251430	0	1	113728	0	0	2670	0	0	242	0	1	42196	0	0	11504	0	0	26130	0	0	30986	0	0
1:169519902	C/A	F5	stop_gained	NM_000130.4:c.1372G>T	NP_000121.2:p.Glu458Ter	2 of 6 Predicted as Damaging	1.552	0.18	11.1615	41											rs775607876	1	PASS	3.97905e-06	1	251316	0	1	113628	0	0	2670	0	0	240	0	0	42140	0	0	11496	0	0	26132	0	1	30950	0	0
1:169519926	C/T	F5	missense_variant	NM_000130.4:c.1348G>A	NP_000121.2:p.Val450Met	6 of 6 Predicted as Damaging	4.583	1	19.4979	26.8											rs765885248	1	PASS	3.97943e-06	1	251292	0	0	113612	0	0	2670	0	0	240	0	0	42130	0	0	11494	0	0	26130	0	0	30948	0	0
1:169519928	C/A	F5	missense_variant	NM_000130.4:c.1346G>T	NP_000121.2:p.Gly449Val	6 of 6 Predicted as Damaging	6.486	1	19.4979	28.2											rs753254754	1	PASS	3.97943e-06	1	251292	0	0	113614	0	0	2670	0	0	240	0	0	42136	0	0	11494	0	0	26130	0	0	30944	0	0
1:169519935	G/A	F5	missense_variant	NM_000130.4:c.1339C>T	NP_000121.2:p.Pro447Ser	6 of 6 Predicted as Damaging	4.755	1	9.5128	25.7											rs757591979	1	PASS	3.97947e-06	1	251290	0	1	113608	0	0	2670	0	0	242	0	0	42132	0	0	11494	0	0	26130	0	1	30940	0	0
1:169519954	G/C	F5	missense_variant	NM_000130.4:c.1320C>G	NP_000121.2:p.Ser440Arg	6 of 6 Predicted as Damaging	0.354	0.997	5.2934	24.2											rs768715252	1	PASS	7.9614e-06	2	251212	0	0	113554	0	0	2668	0	0	240	0	0	42108	0	0	11492	0	0	26128	0	0	30918	0	2
1:169519964	T/C	F5	missense_variant	NM_000130.4:c.1310A>G	NP_000121.2:p.Asn437Ser	6 of 6 Predicted as Damaging	6.668	1	15.876	25.5											rs1449843431	1	PASS	3.98004e-06	1	251254	0	0	113602	0	0	2668	0	0	242	0	0	42138	0	0	11494	0	0	26126	0	0	30934	0	0
1:169519974	C/T	F5	missense_variant	NM_000130.4:c.1300G>A	NP_000121.2:p.Val434Met	6 of 6 Predicted as Damaging	3.013	0.996	10.1683	15.86			Uncertain Significance	(1 Stars) Criteria Provided, Single Submitter,(1 Stars) Criteria Provided, Single Submitter,(1 Stars) Criteria Provided, Single Submitter,(1 Stars) Criteria Provided, Single Submitter							rs574610215	1	PASS	5.57263e-05	14	251228	0	7	113594	0	0	2670	0	0	242	0	2	42138	0	1	11494	0	3	26122	0	1	30928	0	0
1:169519979	T/G	F5	splice_acceptor_variant	NM_000130.4:c.1297-2A>C		2 of 6 Predicted as Damaging	6.668	1	15.876	31	0.999946	0.93									rs762646464	1	PASS	3.98118e-06	1	251182	0	1	113568	0	0	2670	0	0	242	0	1	42124	0	0	11492	0	0	26108	0	0	30932	0	0
1:169521799	A/G	F5	missense_variant	NM_000130.4:c.1292T>C	NP_000121.2:p.Leu431Pro	6 of 6 Predicted as Damaging	8.634	1	16.1566	31											rs759077734	1	PASS	3.97924e-06	1	251304	0	1	113672	0	0	2670	0	0	240	0	1	42182	0	0	11498	0	0	26128	0	0	30954	0	0
1:169521822	G/C	F5	missense_variant	NM_000130.4:c.1269C>G	NP_000121.2:p.Ile423Met	6 of 6 Predicted as Damaging	1.471	1	6.6236	23.4											rs777052171	1	PASS	7.95691e-06	2	251354	0	0	113676	0	0	2670	0	0	240	0	0	42176	0	0	11500	0	0	26128	0	0	30962	0	0
1:169521838	A/G	F5	missense_variant	NM_000130.4:c.1253T>C	NP_000121.2:p.Ile418Thr	6 of 6 Predicted as Damaging	8.686	1	16.4025	26.6											rs765584807	1	PASS	3.97788e-06	1	251390	0	0	113690	0	0	2670	0	0	240	0	0	42182	0	0	11500	0	0	26132	0	0	30966	0	1
1:169521846	T/-	F5	frameshift_variant	NM_000130.4:c.1245delA	NP_000121.2:p.Asp416Metfs*35					25											rs1415677289	1	PASS	3.97823e-06	1	251368	0	0	113678	0	0	2670	0	0	240	0	0	42174	0	0	11500	0	0	26132	0	0	30962	0	0
1:169521854	-/T	F5	frameshift_variant	NM_000130.4:c.1237dupA	NP_000121.2:p.Met413Asnfs*32					21.8											rs766074978	1	PASS	3.97807e-06	1	251378	0	1	113678	0	0	2670	0	0	240	0	0	42182	0	0	11498	0	1	26132	0	0	30956	0	0
1:169521877	G/A	F5	missense_variant	NM_000130.4:c.1214C>T	NP_000121.2:p.Thr405Ile	6 of 6 Predicted as Damaging	2.51	1	16.5976	25.8											rs1404323909	1	PASS	3.97836e-06	1	251360	0	0	113666	0	0	2670	0	0	240	0	0	42172	0	0	11498	0	0	26132	0	0	30954	0	0
1:169521896	A/G	F5	missense_variant	NM_000130.4:c.1195T>C	NP_000121.2:p.Tyr399His	6 of 6 Predicted as Damaging	8.686	1	16.4025	25.5											rs756074656	1	PASS	3.97871e-06	1	251338	0	1	113656	0	0	2670	0	0	240	0	1	42176	0	0	11496	0	0	26132	0	0	30942	0	0
1:169521919	T/C	F5	missense_variant	NM_000130.4:c.1172A>G	NP_000121.2:p.Tyr391Cys	6 of 6 Predicted as Damaging	7.463	1	16.4025	27.4											rs778574920	1	PASS	7.96039e-06	2	251244	0	0	113612	0	0	2670	0	0	240	0	0	42150	0	0	11498	0	0	26128	0	0	30926	0	2
1:169521928	C/-	F5	frameshift_variant	NM_000130.4:c.1163delG	NP_000121.2:p.Gly388Glufs*22					34											rs759086527	1	PASS	3.98083e-06	1	251204	0	0	113604	0	0	2670	0	0	240	0	0	42142	0	0	11496	0	0	26128	0	0	30928	0	0
1:169521932	T/C	F5	missense_variant	NM_000130.4:c.1159A>G	NP_000121.2:p.Ile387Val	6 of 6 Predicted as Damaging	7.14	1	14.9735	25.7											rs1247804060	1	PASS	3.98168e-06	1	251150	0	1	113576	0	0	2670	0	0	240	0	0	42136	0	0	11492	0	0	26126	0	1	30912	0	0
1:169521967	T/C	F5	missense_variant	NM_000130.4:c.1124A>G	NP_000121.2:p.Tyr375Cys	6 of 6 Predicted as Damaging	3.338	1	10.6511	27											rs774767478	1	PASS	3.9873e-06	1	250796	0	0	113402	0	0	2668	0	0	240	0	0	42058	0	0	11482	0	0	26120	0	0	30834	0	1
1:169524460	T/-	F5	frameshift_variant	NM_000130.4:c.1078delA	NP_000121.2:p.Ile360Phefs*7					27.2											rs779283807	1	PASS	3.97678e-06	1	251460	0	0	113740	0	0	2670	0	0	242	0	0	42210	0	0	11498	0	0	26134	0	0	30986	0	1
1:169524466	C/G	F5	missense_variant	NM_000130.4:c.1072G>C	NP_000121.2:p.Glu358Gln	6 of 6 Predicted as Damaging	5.332	1	19.6703	26.6											rs751143631	1	PASS	3.97671e-06	1	251464	0	1	113744	0	0	2670	0	0	242	0	0	42210	0	1	11500	0	0	26134	0	0	30988	0	0
1:169524471	G/A	F5	missense_variant	NM_000130.4:c.1067C>T	NP_000121.2:p.Ala356Val	6 of 6 Predicted as Damaging	7.051	1	19.6703	27.7											rs1408402976	1	PASS	3.97706e-06	1	251442	0	1	113728	0	0	2670	0	0	242	0	0	42204	0	0	11498	0	1	26134	0	0	30980	0	0
1:169524477	A/G	F5	missense_variant	NM_000130.4:c.1061T>C	NP_000121.2:p.Ile354Thr	6 of 6 Predicted as Damaging	8.423	1	15.8288	27											rs373183037	1	PASS	3.97693e-06	1	251450	0	1	113730	0	0	2670	0	0	242	0	0	42206	0	0	11500	0	0	26134	0	1	30978	0	0
1:169524481	A/C	F5	missense_variant	NM_000130.4:c.1057T>G	NP_000121.2:p.Phe353Val	6 of 6 Predicted as Damaging	8.423	1	15.8288	28.6											rs1253789059	1	PASS	3.97697e-06	1	251448	0	0	113734	0	0	2670	0	0	242	0	0	42202	0	0	11500	0	0	26132	0	0	30988	0	0
1:169524489	C/T	F5	stop_gained	NM_000130.4:c.1049G>A	NP_000121.2:p.Trp350Ter	2 of 6 Predicted as Damaging	7.041	1	19.8863	41											rs1200742190	1	PASS	3.97697e-06	1	251448	0	0	113730	0	0	2670	0	0	242	0	0	42210	0	0	11498	0	0	26134	0	0	30976	0	0
1:169524505	G/A	F5	missense_variant	NM_000130.4:c.1033C>T	NP_000121.2:p.Arg345Trp	6 of 6 Predicted as Damaging	3.779	1	9.0834	26.2											rs746260106	1	PASS	0.000222749	56	251404	0	16	113698	0	0	2670	0	0	242	0	7	42192	0	3	11490	0	3	26130	0	3	30974	0	0
1:169524506	C/A	F5	missense_variant	NM_000130.4:c.1032G>T	NP_000121.2:p.Arg344Ser	6 of 6 Predicted as Damaging	0.238	0.99	3.5934	23.7											rs1376064319	1	PASS	3.97741e-06	1	251420	0	0	113704	0	0	2670	0	0	242	0	0	42198	0	0	11494	0	0	26130	0	0	30970	0	1
1:169524509	C/G	F5	missense_variant	NM_000130.4:c.1029G>C	NP_000121.2:p.Gln343His	6 of 6 Predicted as Damaging	0.649	0.997	6.7327	23.4											rs1043138021	1	PASS	3.9775e-06	1	251414	0	0	113700	0	0	2670	0	0	242	0	0	42192	0	0	11492	0	0	26130	0	0	30974	0	0
1:169524552	C/T	F5	missense_variant	NM_000130.4:c.986G>A	NP_000121.2:p.Cys329Tyr	6 of 6 Predicted as Damaging	6.711	1	19.8863	27.9											rs574459300	1	PASS	3.98035e-06	1	251234	0	0	113544	0	0	2670	0	0	242	0	0	42108	0	0	11490	0	0	26124	0	0	30910	0	0
1:169524552	C/A	F5	missense_variant	NM_000130.4:c.986G>T	NP_000121.2:p.Cys329Phe	6 of 6 Predicted as Damaging	6.711	1	19.8863	28.6											rs574459300	1	PASS	4.37839e-05	11	251234	0	0	113544	0	0	2670	0	0	242	0	0	42108	0	0	11490	0	0	26124	0	0	30910	0	0
1:169525882	G/A	F5	splice_donor_variant	NM_000130.4:c.952+2C>T		2 of 6 Predicted as Damaging	2.791	1	9.5403	23.7											rs767300859	1	PASS	3.97994e-06	1	251260	0	0	113642	0	0	2670	0	0	242	0	0	42166	0	0	11490	0	0	26102	0	0	30972	0	0
1:169525887	G/A	F5	stop_gained	NM_000130.4:c.949C>T	NP_000121.2:p.Gln317Ter	2 of 6 Predicted as Damaging	2.443	1	10.6932	39											rs752360108	1	PASS	7.95779e-06	2	251326	0	0	113678	0	0	2670	0	0	242	0	0	42182	0	0	11494	0	0	26122	0	0	30968	0	0
1:169525926	C/T	F5	missense_variant	NM_000130.4:c.910G>A	NP_000121.2:p.Gly304Arg	6 of 6 Predicted as Damaging	7.456	1	20.6439	29.3											rs747353298	1	PASS	3.9775e-06	1	251414	0	1	113732	0	0	2668	0	0	242	0	0	42206	0	1	11504	0	0	26132	0	0	30980	0	0
1:169525944	T/C	F5	missense_variant	NM_000130.4:c.892A>G	NP_000121.2:p.Met298Val	6 of 6 Predicted as Damaging	4.81	1	16.6277	23.9											rs1226230656	1	PASS	3.97735e-06	1	251424	0	1	113730	0	0	2670	0	0	242	0	0	42204	0	0	11502	0	0	26130	0	1	30982	0	0
1:169525953	T/C	F5	missense_variant	NM_000130.4:c.883A>G	NP_000121.2:p.Thr295Ala	6 of 6 Predicted as Damaging	5.826	1	16.6277	24.3											rs371760153	1	PASS	1.19316e-05	3	251434	0	3	113732	0	0	2670	0	0	242	0	1	42208	0	1	11498	0	0	26130	0	1	30984	0	0
1:169525970	A/C	F5	missense_variant	NM_000130.4:c.866T>G	NP_000121.2:p.Val289Gly	6 of 6 Predicted as Damaging	5.967	1	12.1161	25.8											rs770787334	1	PASS	3.97744e-06	1	251418	0	1	113728	0	0	2670	0	0	242	0	0	42202	0	1	11500	0	0	26130	0	0	30984	0	0
1:169525974	G/C	F5	missense_variant	NM_000130.4:c.862C>G	NP_000121.2:p.Leu288Val	6 of 6 Predicted as Damaging	3.124	1	9.1418	24											rs147889072	1	PASS	7.95539e-06	2	251402	0	2	113710	0	0	2670	0	0	242	0	2	42194	0	0	11500	0	0	26130	0	0	30974	0	0
1:169525974	G/A	F5	missense_variant	NM_000130.4:c.862C>T	NP_000121.2:p.Leu288Phe	6 of 6 Predicted as Damaging	3.124	1	9.1418	24.1											rs147889072	1	PASS	1.59108e-05	4	251402	0	3	113710	0	0	2670	0	0	242	0	2	42194	0	0	11500	0	0	26130	0	1	30974	0	0
1:169526018	C/A	F5	missense_variant	NM_000130.4:c.818G>T	NP_000121.2:p.Gly273Val	6 of 6 Predicted as Damaging	7.456	1	20.6439	29.2											rs781526793	1	PASS	3.97934e-06	1	251298	0	0	113634	0	0	2670	0	0	242	0	0	42156	0	0	11490	0	0	26128	0	0	30948	0	0
1:169526019	C/T	F5	missense_variant	NM_000130.4:c.817G>A	NP_000121.2:p.Gly273Ser	6 of 6 Predicted as Damaging	7.456	1	20.6439	31											rs1328429966	1	PASS	3.97937e-06	1	251296	0	1	113634	0	0	2670	0	0	242	0	1	42150	0	0	11492	0	0	26130	0	0	30950	0	0
1:169526033	G/T	F5	missense_variant	NM_000130.4:c.803C>A	NP_000121.2:p.Ser268Tyr	6 of 6 Predicted as Damaging	9.434	1	20.6439	29											rs1318792744	1	PASS	3.97972e-06	1	251274	0	0	113596	0	0	2670	0	0	242	0	0	42128	0	0	11496	0	0	26126	0	0	30934	0	0
1:169526075	C/T	F5	missense_variant	NM_000130.4:c.761G>A	NP_000121.2:p.Ser254Asn	6 of 6 Predicted as Damaging	7.456	1	20.6439	28.1											rs775430046	1	PASS	1.59354e-05	4	251014	0	0	113390	0	0	2670	0	0	240	0	0	41996	0	0	11474	0	0	26124	0	0	30886	0	0
1:169526094	A/T	F5	missense_variant	NM_000130.4:c.742T>A	NP_000121.2:p.Cys248Ser	6 of 6 Predicted as Damaging	8.923	1	16.6277	27.1											rs1305996873	1	PASS	3.98909e-06	1	250684	0	1	113130	0	0	2668	0	0	240	0	0	41882	0	1	11450	0	0	26110	0	0	30780	0	0
1:169528393	G/A	F5	missense_variant	NM_000130.4:c.728C>T	NP_000121.2:p.Pro243Leu	6 of 6 Predicted as Damaging	8.258	1	20.5373	32	0.99943	0.956									rs1275504341	1	PASS	3.98276e-06	1	251082	0	1	113450	0	0	2668	0	0	242	0	1	42030	0	0	11488	0	0	26126	0	0	30896	0	0
1:169528394	G/A	F5	missense_variant	NM_000130.4:c.727C>T	NP_000121.2:p.Pro243Ser	6 of 6 Predicted as Damaging	8.258	1	20.5373	24.8											rs368524944	1	PASS	3.98337e-06	1	251044	0	1	113436	0	0	2668	0	0	242	0	0	42022	0	1	11488	0	0	26126	0	0	30890	0	0
1:169528394	G/T	F5	missense_variant	NM_000130.4:c.727C>A	NP_000121.2:p.Pro243Thr	6 of 6 Predicted as Damaging	8.258	1	20.5373	24.4											rs368524944	1	PASS	3.98337e-06	1	251044	0	1	113436	0	0	2668	0	0	242	0	0	42022	0	0	11488	0	0	26126	0	1	30890	0	0
1:169528412	A/G	F5	missense_variant	NM_000130.4:c.709T>C	NP_000121.2:p.Tyr237His	6 of 6 Predicted as Damaging	7.819	1	16.542	25.3											rs761510828	1	PASS	3.98118e-06	1	251182	0	0	113508	0	0	2668	0	0	242	0	0	42072	0	0	11488	0	0	26128	0	0	30910	0	0
1:169528422	TG/-	F5	frameshift_variant	NM_000130.4:c.698_699delCA	NP_000121.2:p.Thr233Serfs*18					34											rs779956796	1	PASS	3.98137e-06	1	251170	0	1	113508	0	0	2670	0	0	242	0	1	42070	0	0	11490	0	0	26128	0	0	30908	0	0
1:169528425	G/C	F5	stop_gained	NM_000130.4:c.696C>G	NP_000121.2:p.Tyr232Ter	2 of 6 Predicted as Damaging	2.15	1	10.9831	40											rs1389180171	1	PASS	3.98191e-06	1	251136	0	1	113488	0	0	2670	0	0	242	0	0	42064	0	0	11486	0	0	26126	0	1	30900	0	0
1:169528429	A/G	F5	missense_variant	NM_000130.4:c.692T>C	NP_000121.2:p.Met231Thr	6 of 6 Predicted as Damaging	3.332	1	12.1138	25.1											rs867187509	1	PASS	3.98102e-06	1	251192	0	1	113520	0	0	2670	0	0	242	0	0	42084	0	0	11482	0	0	26128	0	1	30914	0	0
1:169528487	C/T	F5	missense_variant	NM_000130.4:c.634G>A	NP_000121.2:p.Val212Met	6 of 6 Predicted as Damaging	2.529	0.98	15.52	25.2											rs757503552	1	PASS	2.78669e-05	7	251194	0	2	113552	0	0	2668	0	0	242	0	1	42112	0	1	11488	0	0	26116	0	0	30926	0	0
1:169528528	A/C	F5	missense_variant	NM_000130.4:c.593T>G	NP_000121.2:p.Leu198Arg	6 of 6 Predicted as Damaging	6.414	1	16.4219	25.5											rs1235596074	1	PASS	3.98216e-06	1	251120	0	0	113538	0	0	2668	0	0	242	0	0	42100	0	0	11486	0	0	26110	0	0	30932	0	0
1:169528529	G/C	F5	missense_variant	NM_000130.4:c.592C>G	NP_000121.2:p.Leu198Val	6 of 6 Predicted as Damaging	4.071	1	11.6905	23.9											rs747833423	1	PASS	3.98254e-06	1	251096	0	1	113532	0	0	2668	0	0	242	0	0	42100	0	1	11482	0	0	26110	0	0	30930	0	0
1:169529809	A/C	F5	missense_variant	NM_000130.4:c.569T>G	NP_000121.2:p.Leu190Arg	6 of 6 Predicted as Damaging	9.075	1	15.4134	26.1											rs745311504	1	PASS	7.95615e-06	2	251378	0	0	113712	0	0	2668	0	0	242	0	0	42190	0	0	11500	0	0	26132	0	0	30980	0	0
1:169529837	C/A	F5	missense_variant	NM_000130.4:c.541G>T	NP_000121.2:p.Asp181Tyr	6 of 6 Predicted as Damaging	7.598	1	19.1602	24.8											rs766643747	1	PASS	3.97779e-06	1	251396	0	1	113716	0	0	2668	0	0	242	0	0	42192	0	0	11504	0	1	26130	0	0	30980	0	0
1:169529837	C/T	F5	missense_variant	NM_000130.4:c.541G>A	NP_000121.2:p.Asp181Asn	6 of 6 Predicted as Damaging	7.598	1	19.1602	24.9											rs766643747	1	PASS	3.97779e-06	1	251396	0	0	113716	0	0	2668	0	0	242	0	0	42192	0	0	11504	0	0	26130	0	0	30980	0	0
1:169529859	G/C	F5	stop_gained	NM_000130.4:c.519C>G	NP_000121.2:p.Tyr173Ter	2 of 6 Predicted as Damaging	2.234	1	9.9661	38											rs749010359	1	PASS	3.97807e-06	1	251378	0	1	113716	0	0	2670	0	0	242	0	0	42192	0	0	11502	0	0	26132	0	1	30978	0	0
1:169529883	A/-	F5	frameshift_variant	NM_000130.4:c.495delT	NP_000121.2:p.Pro166Hisfs*13					23.7											rs762229917	1	PASS	5.17133e-05	13	251386	0	3	113706	0	0	2670	0	0	242	0	0	42196	0	0	11498	0	3	26130	0	0	30970	0	0
1:169529884	G/T	F5	missense_variant	NM_000130.4:c.494C>A	NP_000121.2:p.Pro165His	6 of 6 Predicted as Damaging	6.082	1	12.9354	26.3											rs1339557977	1	PASS	3.97836e-06	1	251360	0	0	113694	0	0	2670	0	0	242	0	0	42190	0	0	11498	0	0	26128	0	0	30966	0	0
1:169529886	G/T	F5	missense_variant	NM_000130.4:c.492C>A	NP_000121.2:p.Asp164Glu	6 of 6 Predicted as Damaging	2.267	1	11.5758	24.1											rs1227415968	1	PASS	3.97785e-06	1	251392	0	1	113704	0	0	2670	0	0	242	0	1	42186	0	0	11496	0	0	26132	0	0	30978	0	0
1:169529900	G/A	F5	missense_variant	NM_000130.4:c.478C>T	NP_000121.2:p.Pro160Ser	6 of 6 Predicted as Damaging	9.588	1	19.1602	25.8											rs1265445384	1	PASS	3.97829e-06	1	251364	0	0	113678	0	0	2670	0	0	242	0	0	42168	0	0	11500	0	0	26130	0	0	30968	0	0
1:169529917	A/G	F5	missense_variant	NM_000130.4:c.461T>C	NP_000121.2:p.Ile154Thr	6 of 6 Predicted as Damaging	9.075	1	15.4134	25											rs1168397359	1	PASS	3.9782e-06	1	251370	0	0	113682	0	0	2670	0	0	242	0	0	42180	0	0	11490	0	0	26132	0	0	30968	0	0
1:169529942	G/A	F5	stop_gained	NM_000130.4:c.436C>T	NP_000121.2:p.Arg146Ter	2 of 6 Predicted as Damaging	1.264	0.731	15.7379	38											rs767477438	1	PASS	7.95748e-06	2	251336	0	0	113660	0	0	2668	0	0	242	0	0	42168	0	0	11488	0	0	26132	0	0	30962	0	0
1:169529944	C/T	F5	missense_variant	NM_000130.4:c.434G>A	NP_000121.2:p.Gly145Asp	6 of 6 Predicted as Damaging	3.816	0.992	13.4586	24.5											rs752741472	1	PASS	1.59151e-05	4	251334	0	4	113648	0	0	2668	0	0	242	0	1	42152	0	0	11494	0	0	26132	0	3	30960	0	0
1:169529953	A/G	F5	missense_variant	NM_000130.4:c.425T>C	NP_000121.2:p.Val142Ala	6 of 6 Predicted as Damaging	9.075	0.995	15.4134	24											rs552620077	1	PASS	3.97874e-06	1	251336	0	1	113652	0	0	2668	0	0	242	0	0	42156	0	0	11494	0	0	26132	0	1	30960	0	0
1:169529960	C/T	F5	missense_variant	NM_000130.4:c.418G>A	NP_000121.2:p.Asp140Asn	6 of 6 Predicted as Damaging	7.598	1	14.069	25.3											rs778572956	1	PASS	7.95887e-06	2	251292	0	0	113634	0	0	2668	0	0	242	0	0	42150	0	0	11492	0	0	26132	0	0	30950	0	1
1:169529963	C/-	F5	frameshift_variant	NM_000130.4:c.415delG	NP_000121.2:p.Asp139Thrfs*40					33											rs770075335	1	PASS	3.9794e-06	1	251294	0	1	113626	0	0	2668	0	0	242	0	0	42150	0	0	11490	0	0	26128	0	1	30948	0	0
1:169530004	C/A	F5	missense_variant	NM_000130.4:c.374G>T	NP_000121.2:p.Gly125Val	6 of 6 Predicted as Damaging	7.267	1	19.1602	34	0.999885	0.992									rs760694648	1	PASS	3.98318e-06	1	251056	0	1	113468	0	0	2666	0	0	242	0	0	42056	0	1	11484	0	0	26122	0	0	30898	0	0
1:169530004	C/T	F5	missense_variant	NM_000130.4:c.374G>A	NP_000121.2:p.Gly125Asp	6 of 6 Predicted as Damaging	7.267	1	19.1602	33	0.999528	0.892									rs760694648	1	PASS	2.38991e-05	6	251056	0	0	113468	0	0	2666	0	0	242	0	0	42056	0	0	11484	0	0	26122	0	0	30898	0	0
1:169541475	G/C	F5	stop_gained	NM_000130.4:c.357C>G	NP_000121.2:p.Tyr119Ter	2 of 6 Predicted as Damaging	1.509	1	8.1307	37											rs1307744577	1	PASS	3.9993e-06	1	250044	0	1	113092	0	0	2664	0	0	240	0	1	42058	0	0	11418	0	0	25936	0	0	30776	0	0
1:169541492	G/T	F5	missense_variant	NM_000130.4:c.340C>A	NP_000121.2:p.Pro114Thr	6 of 6 Predicted as Damaging	3.38	1	13.8296	24											rs761734890	1	PASS	3.99294e-06	1	250442	0	1	113282	0	0	2668	0	0	240	0	0	42068	0	0	11466	0	0	26020	0	1	30820	0	0
1:169541495	G/T	F5	missense_variant	NM_000130.4:c.337C>A	NP_000121.2:p.His113Asn	6 of 6 Predicted as Damaging	4.446	1	16.5806	25.5											rs772893800	1	PASS	3.99316e-06	1	250428	0	0	113274	0	0	2668	0	0	240	0	0	42062	0	0	11470	0	0	26012	0	0	30822	0	0
1:169541525	T/G	F5	missense_variant	NM_000130.4:c.307A>C	NP_000121.2:p.Lys103Gln	6 of 6 Predicted as Damaging	4.941	1	13.3108	25.7											rs779420274	1	PASS	3.98737e-06	1	250792	0	1	113438	0	0	2668	0	0	240	0	1	42100	0	0	11480	0	0	26074	0	0	30876	0	0
1:169541531	G/C	F5	missense_variant	NM_000130.4:c.301C>G	NP_000121.2:p.His101Asp	6 of 6 Predicted as Damaging	6.067	1	16.5806	25.7											rs1436365896	1	PASS	3.98753e-06	1	250782	0	1	113426	0	0	2668	0	0	242	0	0	42086	0	0	11476	0	0	26074	0	1	30880	0	0
1:169541554	T/A	F5	missense_variant	NM_000130.4:c.278A>T	NP_000121.2:p.Glu93Val	6 of 6 Predicted as Damaging	4.941	1	13.6388	27.4											rs1437813640	1	PASS	3.98584e-06	1	250888	0	1	113488	0	0	2668	0	0	242	0	1	42086	0	0	11486	0	0	26096	0	0	30910	0	0
1:169541569	G/A	F5	missense_variant	NM_000130.4:c.263C>T	NP_000121.2:p.Pro88Leu	6 of 6 Predicted as Damaging	6.067	1	16.9823	28.8											rs762698154	1	PASS	3.98638e-06	1	250854	0	1	113506	0	0	2668	0	0	240	0	0	42108	0	0	11478	0	1	26100	0	0	30912	0	0
1:169541576	G/A	F5	missense_variant	NM_000130.4:c.256C>T	NP_000121.2:p.Leu86Phe	6 of 6 Predicted as Damaging	4.392	1	16.9823	26.8											rs774205060	1	PASS	0.000199429	50	250716	0	0	113482	0	0	2668	0	0	242	0	0	42096	0	0	11482	0	0	26104	0	0	30890	0	0
1:169541578	A/C	F5	missense_variant	NM_000130.4:c.254T>G	NP_000121.2:p.Leu85Arg	6 of 6 Predicted as Damaging	5.745	1	13.6387	27.6											rs146656273	1	PASS	7.9762e-06	2	250746	0	2	113500	0	0	2668	0	0	240	0	2	42100	0	0	11486	0	0	26108	0	0	30898	0	0
1:169551688	T/-	F5	frameshift_variant	NM_000130.4:c.231delA	NP_000121.2:p.Lys77Asnfs*22					23											rs760221124	1	PASS	4.11519e-06	1	243002	0	1	110656	0	0	2636	0	0	232	0	0	41122	0	0	11322	0	1	25222	0	0	30122	0	0
1:169555470	G/C	F5	stop_gained	NM_000130.4:c.155C>G	NP_000121.2:p.Ser52Ter	1 of 6 Predicted as Damaging	0.083		4.8945	27.8											rs779040384	1	PASS	8.01244e-06	2	249612	0	2	111940	0	0	2670	0	0	242	0	2	40556	0	0	11482	0	0	26132	0	0	30858	0	0
1:169555492	A/G	F5	missense_variant	NM_000130.4:c.133T>C	NP_000121.2:p.Tyr45His	6 of 6 Predicted as Damaging	4.323	1	11.7925	23											rs746723635	1	PASS	4.00327e-06	1	249796	0	0	112118	0	0	2668	0	0	242	0	0	40738	0	0	11482	0	0	26132	0	0	30856	0	0
1:169555513	C/A	F5	missense_variant	NM_000130.4:c.112G>T	NP_000121.2:p.Ala38Ser	6 of 6 Predicted as Damaging	3.611	0.981	14.6393	23.7											rs184663825	1	PASS	0.000475346	119	250344	0	41	112684	0	0	2670	0	4	242	0	2	41250	0	0	11486	0	31	26132	0	4	30904	0	0
1:169555519	C/T	F5	missense_variant	NM_000130.4:c.106G>A	NP_000121.2:p.Val36Met	6 of 6 Predicted as Damaging	0.263	0.983	9.8642	24.8											rs147487854	1	PASS	0.000363215	91	250540	0	0	112862	0	0	2670	0	0	240	0	0	41420	0	0	11490	0	0	26130	0	0	30912	0	83
1:169555523	G/T	F5	missense_variant	NM_000130.4:c.102C>A	NP_000121.2:p.Phe34Leu	6 of 6 Predicted as Damaging	2.033	1	14.6393	26.5											rs760032424	1	PASS	7.98059e-06	2	250608	0	2	112940	0	0	2670	0	0	242	0	0	41494	0	0	11492	0	0	26130	0	2	30912	0	0
12:21294542	G/T	SLCO1B1	stop_gained	NM_006446.4:c.34G>T	NP_006437.3:p.Glu12Ter	1 of 6 Predicted as Damaging	0.96	0.679	5.6383	32											rs756064979	1	PASS	1.59605e-05	4	250618	0	1	113200	0	0	2664	0	0	240	0	1	41934	0	0	11460	0	0	26116	0	0	30786	0	0
12:21294565	G/-	SLCO1B1	frameshift_variant	NM_006446.4:c.57delG	NP_006437.3:p.Thr21Glnfs*7					17.69											rs755776876	1	PASS	1.19805e-05	3	250406	0	3	113128	0	0	2664	0	0	240	0	0	41890	0	0	11464	0	3	26104	0	0	30766	0	0
12:21294593	G/A	SLCO1B1	splice_donor_variant	NM_006446.4:c.84+1G>A		2 of 6 Predicted as Damaging	3.719	1	10.8585	24.4	0.999975	0.762	Uncertain Significance	(1 Stars) Criteria Provided, Single Submitter							rs571639279	1	PASS	0.000144762	36	248684	1	1	112476	0	0	2656	0	0	238	0	0	41536	0	0	11402	0	0	26060	0	1	30584	0	0
12:21294594	T/G	SLCO1B1	splice_donor_variant	NM_006446.4:c.84+2T>G		2 of 6 Predicted as Damaging	3.017	0.987	8.7333	24	0.99996	0.752	Uncertain Significance	(1 Stars) Criteria Provided, Single Submitter							rs1017205455	1	PASS	1.2066e-05	3	248632	0	3	112440	0	0	2656	0	0	238	0	3	41530	0	0	11394	0	0	26058	0	0	30564	0	0
12:21325726	G/A	SLCO1B1	splice_donor_variant	NM_006446.4:c.226+1G>A		2 of 6 Predicted as Damaging	8.873	1	15.2249	28.6	0.999996	0.926									rs564217518	1	PASS	8.03839e-05	20	248806	0	0	112288	0	0	2648	0	0	238	0	0	41940	0	0	11290	0	0	25556	0	0	30616	0	0
12:21327563	A/-	SLCO1B1	frameshift_variant	NM_006446.4:c.279delA	NP_006437.3:p.Arg93Serfs*4					22.9											rs1565673108	1	PASS	3.98092e-06	1	251198	0	0	113606	0	0	2668	0	0	242	0	0	42156	0	0	11490	0	0	26112	0	0	30938	0	0
12:21327585	TG/-	SLCO1B1	frameshift_variant	NM_006446.4:c.302_303delGT	NP_006437.3:p.Cys101Phefs*24					23.5											rs772194160	1	PASS	7.96045e-06	2	251242	0	2	113614	0	0	2670	0	0	242	0	0	42150	0	0	11490	0	2	26122	0	0	30940	0	0
12:21327644	G/C	SLCO1B1	splice_donor_variant	NM_006446.4:c.359+1G>C		2 of 6 Predicted as Damaging	9.063	1	15.8963	28.4	0.999994	0.926									rs753102683	1	PASS	4.14168e-06	1	241448	0	0	110398	0	0	2646	0	0	236	0	0	40368	0	0	11328	0	0	25922	0	0	29898	0	0
12:21329793	T/G	SLCO1B1	stop_gained	NM_006446.4:c.443T>G	NP_006437.3:p.Leu148Ter	1 of 6 Predicted as Damaging	0.085		4.8008	35											rs553054459	1	PASS	3.99265e-06	1	250460	0	0	112944	0	0	2662	0	0	240	0	0	41794	0	0	11440	0	0	26102	0	0	30706	0	1
12:21329832	G/T	SLCO1B1	splice_donor_variant	NM_006446.4:c.481+1G>T		2 of 6 Predicted as Damaging	4.107	1	10.71	24.6	0.999984	0.846	Likely Benign	(1 Stars) Criteria Provided, Single Submitter	DM?	"Rotor_syndrome"					rs77271279	1	PASS	0.00235338	589	250278	7	9	112920	0	1	2660	0	0	240	0	3	41798	0	2	11438	0	0	26080	0	3	30704	0	503
12:21331540	G/A	SLCO1B1	stop_gained	NM_006446.4:c.512G>A	NP_006437.3:p.Trp171Ter	2 of 6 Predicted as Damaging	9.007	1	15.813	41											rs985933022	1	PASS	3.98378e-06	1	251018	0	1	113426	0	0	2668	0	1	242	0	0	42032	0	0	11466	0	0	26124	0	0	30894	0	0
12:21331541	G/A	SLCO1B1	stop_gained	NM_006446.4:c.513G>A	NP_006437.3:p.Trp171Ter	2 of 6 Predicted as Damaging	9.007	1	15.813	40											rs909027126	1	PASS	3.98365e-06	1	251026	0	0	113432	0	0	2668	0	0	242	0	0	42028	0	0	11472	0	0	26122	0	0	30900	0	0
12:21331556	G/-	SLCO1B1	frameshift_variant	NM_006446.4:c.530delG	NP_006437.3:p.Gly177Valfs*7					25.3											rs755871104	1	PASS	7.96419e-06	2	251124	0	2	113506	0	0	2668	0	0	242	0	0	42078	0	0	11476	0	0	26124	0	2	30918	0	0
12:21331577	-/A	SLCO1B1	frameshift_variant	NM_006446.4:c.549dupA	NP_006437.3:p.Gly184Argfs*14					25.9											rs1290518110	1	PASS	3.98181e-06	1	251142	0	0	113520	0	0	2668	0	0	242	0	0	42084	0	0	11482	0	0	26126	0	0	30918	0	0
12:21331594	-/TACC	SLCO1B1	frameshift_variant	NM_006446.4:c.566_569dupTACC	NP_006437.3:p.Leu191Thrfs*8					21.2											rs763814831	1	PASS	3.98165e-06	1	251152	0	1	113500	0	0	2668	0	0	240	0	0	42078	0	0	11478	0	0	26130	0	1	30906	0	0
12:21331607	TTCTTACA/-	SLCO1B1	stop_gained	NM_006446.4:c.581_588delCTTACATT	NP_006437.3:p.Ser194Terfs					26											rs1255036115	1	PASS	3.98162e-06	1	251154	0	0	113514	0	0	2668	0	0	240	0	0	42078	0	0	11484	0	0	26130	0	0	30914	0	0
12:21331622	T/-	SLCO1B1	frameshift_variant	NM_006446.4:c.596delT	NP_006437.3:p.Phe199Serfs*11					24.2											rs753740379	1	PASS	7.96337e-06	2	251150	0	0	113514	0	0	2668	0	0	242	0	0	42082	0	0	11480	0	0	26130	0	0	30912	0	0
12:21331855	G/A	SLCO1B1	splice_acceptor_variant	NM_006446.4:c.629-1G>A		2 of 6 Predicted as Damaging	8.974	1	16.1164	25.5	0.999992	0.922									rs1205419424	1	PASS	3.99712e-06	1	250180	0	0	112932	0	0	2666	0	0	238	0	0	41758	0	0	11444	0	0	26104	0	0	30722	0	1
12:21349909	C/T	SLCO1B1	stop_gained	NM_006446.4:c.757C>T	NP_006437.3:p.Arg253Ter	2 of 6 Predicted as Damaging	4.172	0.998	9.6757	36			Pathogenic	(0 Stars) No Assertion Criteria Provided,(1 Stars) Criteria Provided, Single Submitter	DM	"Rotor_syndrome"					rs183501729	1	PASS	5.97238e-05	15	251156	0	0	113502	0	0	2668	0	0	242	0	0	42058	0	0	11498	0	0	26126	0	0	30910	0	0
12:21349926	G/A	SLCO1B1	stop_gained	NM_006446.4:c.774G>A	NP_006437.3:p.Trp258Ter	2 of 6 Predicted as Damaging	7.302	1	12.7505	37											rs1159011720	1	PASS	3.98111e-06	1	251186	0	0	113528	0	0	2668	0	0	242	0	0	42084	0	0	11494	0	0	26130	0	0	30910	0	1
12:21349928	G/A	SLCO1B1	stop_gained	NM_006446.4:c.776G>A	NP_006437.3:p.Trp259Ter	2 of 6 Predicted as Damaging	7.302	1	12.7505	37											rs751112570	1	PASS	7.96235e-06	2	251182	0	0	113526	0	0	2668	0	0	242	0	0	42086	0	0	11492	0	0	26128	0	0	30910	0	0
12:21350012	-/A	SLCO1B1	frameshift_variant	NM_006446.4:c.864dupA	NP_006437.3:p.Glu289Argfs*15					23.5											rs748254586	1	PASS	7.96679e-06	2	251042	0	0	113390	0	0	2666	0	0	242	0	0	42018	0	0	11480	0	0	26128	0	0	30856	0	2
12:21350065	A/T	SLCO1B1	stop_gained	NM_006446.4:c.913A>T	NP_006437.3:p.Lys305Ter	1 of 6 Predicted as Damaging	0.763	0.001	6.5753	35											rs1256108949	1	PASS	3.98324e-06	1	251052	0	0	113438	0	0	2668	0	0	240	0	0	42048	0	0	11480	0	0	26120	0	0	30882	0	0
12:21350097	-/A	SLCO1B1	frameshift_variant	NM_006446.4:c.950dupA	NP_006437.3:p.Asn317Lysfs*14					20.1											rs1565679506	1	PASS	3.99163e-06	1	250524	0	0	113232	0	0	2668	0	0	240	0	0	41974	0	0	11458	0	0	26086	0	0	30806	0	1
12:21350108	C/-	SLCO1B1	frameshift_variant	NM_006446.4:c.957delC	NP_006437.3:p.Asn321Metfs*2					22.8											rs770209422	1	PASS	3.99501e-06	1	250312	0	0	113212	0	0	2668	0	0	240	0	0	41972	0	0	11460	0	0	26076	0	0	30796	0	0
12:21350110	A/T	SLCO1B1	stop_gained	NM_006446.4:c.958A>T	NP_006437.3:p.Lys320Ter	1 of 6 Predicted as Damaging	-0.501		2.9581	35											rs776045515	1	PASS	2.3976e-05	6	250250	0	0	113192	0	0	2668	0	0	240	0	0	41970	0	0	11464	0	0	26070	0	0	30780	0	0
12:21350123	G/A	SLCO1B1	splice_donor_variant	NM_006446.4:c.970+1G>A		2 of 6 Predicted as Damaging	5.178	1	12.3929	23.7	0.999985	0.87									rs763360503	1	PASS	4.00741e-06	1	249538	0	0	112956	0	0	2662	0	0	240	0	0	41884	0	0	11442	0	0	26026	0	0	30702	0	0
12:21350123	G/T	SLCO1B1	splice_donor_variant	NM_006446.4:c.970+1G>T		2 of 6 Predicted as Damaging	5.178	1	12.3929	23.6	0.999984	0.864									rs763360503	1	PASS	4.00741e-06	1	249538	0	0	112956	0	0	2662	0	0	240	0	0	41884	0	0	11442	0	0	26026	0	0	30702	0	0
12:21353443	T/-	SLCO1B1	frameshift_variant	NM_006446.4:c.977delT	NP_006437.3:p.Phe326Serfs*19					23.4											rs763545439	1	PASS	4.48861e-06	1	222786	0	0	104720	0	0	2574	0	0	228	0	0	37990	0	0	10846	0	0	24826	0	0	28256	0	0
12:21353443	-/T	SLCO1B1	frameshift_variant	NM_006446.4:c.977dupT	NP_006437.3:p.Gln327Profs*4					23.6												1	PASS	8.97722e-06	2	222786	0	1	104720	0	1	2574	0	0	228	0	0	37990	0	0	10846	0	0	24826	0	0	28256	0	0
12:21353455	T/-	SLCO1B1	frameshift_variant	NM_006446.4:c.987delT	NP_006437.3:p.Phe329Leufs*16					22.3											rs775188590	1	PASS	8.65456e-06	2	231092	0	1	107490	0	0	2608	0	0	226	0	0	39030	0	0	11120	0	1	25452	0	0	29054	0	0
12:21353480	-/CT	SLCO1B1	frameshift_variant	NM_006446.4:c.1009_1010dupCT	NP_006437.3:p.Tyr338Cysfs*8					16.86											rs763902580	1	PASS	8.10938e-06	2	246628	0	2	112102	0	0	2664	0	0	236	0	0	41288	0	2	11400	0	0	26002	0	0	30512	0	0
12:21353485	T/A	SLCO1B1	stop_gained	NM_006446.4:c.1014T>A	NP_006437.3:p.Tyr338Ter	1 of 6 Predicted as Damaging	0.429	0.228	5.7575	35											rs752570053	1	PASS	4.02304e-06	1	248568	0	1	112792	0	0	2666	0	0	238	0	0	41726	0	0	11436	0	0	26038	0	1	30688	0	0
12:21353545	T/A	SLCO1B1	stop_gained	NM_006446.4:c.1074T>A	NP_006437.3:p.Tyr358Ter	1 of 6 Predicted as Damaging	-0.197	0.002	9.0361	34											rs1482611365	1	PASS	3.98937e-06	1	250666	0	0	113356	0	0	2666	0	0	240	0	0	42040	0	0	11482	0	0	26086	0	0	30842	0	0
12:21353564	C/T	SLCO1B1	stop_gained	NM_006446.4:c.1093C>T	NP_006437.3:p.Gln365Ter	2 of 6 Predicted as Damaging	5.502	1	12.0129	37											rs751331705	1	PASS	1.19715e-05	3	250596	0	0	113346	0	0	2668	0	0	240	0	0	42026	0	0	11476	0	0	26088	0	0	30848	0	0
12:21353607	G/A	SLCO1B1	splice_donor_variant	NM_006446.4:c.1135+1G>A		2 of 6 Predicted as Damaging	6.915	1	12.0129	26.5	0.99999	0.926									rs756393362	1	PASS	7.60712e-05	19	249766	0	1	113038	0	0	2666	0	0	240	0	0	41892	0	0	11440	0	0	26034	0	1	30766	0	0
12:21355525	-/T	SLCO1B1	frameshift_variant	NM_006446.4:c.1239dupT	NP_006437.3:p.Thr414Tyrfs*18					22.8											rs1278427452	1	PASS	3.99182e-06	1	250512	0	1	113248	0	0	2666	0	0	240	0	0	42026	0	0	11448	0	0	26024	0	1	30844	0	0
12:21355616	G/-	SLCO1B1	frameshift_variant	NM_006446.4:c.1327delG	NP_006437.3:p.Asp443Metfs*6					29.5											rs1565437813	1	PASS	3.99875e-06	1	250078	0	0	113124	0	0	2668	0	0	238	0	0	41954	0	0	11432	0	0	26066	0	0	30766	0	0
12:21355621	G/A	SLCO1B1	splice_donor_variant	NM_006446.4:c.1331+1G>A		2 of 6 Predicted as Damaging	7.001	1	11.1799	25.6	0.999956	0.924									rs1442935615	1	PASS	4.00304e-06	1	249810	0	1	113038	0	0	2668	0	0	238	0	0	41910	0	0	11426	0	0	26052	0	1	30744	0	0
12:21358892	T/A	SLCO1B1	stop_gained	NM_006446.4:c.1422T>A	NP_006437.3:p.Cys474Ter	2 of 6 Predicted as Damaging	3.421	1	10.5241	44											rs771009101	1	PASS	3.98283e-06	1	251078	0	0	113548	0	0	2666	0	0	242	0	0	42112	0	0	11486	0	0	26126	0	0	30916	0	1
12:21358945	C/A	SLCO1B1	stop_gained	NM_006446.4:c.1475C>A	NP_006437.3:p.Ser492Ter	1 of 6 Predicted as Damaging	0.481	0.001	5.8429	38											rs761120153	1	PASS	3.98441e-06	1	250978	0	0	113484	0	0	2666	0	0	240	0	0	42074	0	0	11482	0	0	26120	0	0	30902	0	0
12:21358945	-/C	SLCO1B1	frameshift_variant	NM_006446.4:c.1475dupC	NP_006437.3:p.Ser493Lysfs*4					29.5											rs755056022	1	PASS	1.5936e-05	4	251004	0	0	113496	0	0	2666	0	0	240	0	0	42070	0	0	11482	0	0	26126	0	0	30912	0	4
12:21370073	-/T	SLCO1B1	frameshift_variant	NM_006446.4:c.1520dupT	NP_006437.3:p.Leu507Phefs*17					34											rs748425668	1	PASS	7.95729e-06	2	251342	0	2	113660	0	0	2670	0	0	240	0	1	42176	0	0	11500	0	0	26130	0	1	30944	0	0
12:21370092	C/T	SLCO1B1	stop_gained	NM_006446.4:c.1537C>T	NP_006437.3:p.Gln513Ter	1 of 6 Predicted as Damaging	-0.075		5.3929	35											rs1230393363	1	PASS	3.97801e-06	1	251382	0	1	113684	0	0	2670	0	0	242	0	1	42182	0	0	11502	0	0	26132	0	0	30956	0	0
12:21370108	C/G	SLCO1B1	stop_gained	NM_006446.4:c.1553C>G	NP_006437.3:p.Ser518Ter	2 of 6 Predicted as Damaging	3.739	0.934	13.0121	37											rs773226433	1	PASS	3.97791e-06	1	251388	0	1	113692	0	0	2670	0	0	242	0	0	42182	0	0	11502	0	1	26130	0	0	30966	0	0
12:21370121	-/TGAA	SLCO1B1	stop_gained	NM_006446.4:c.1568_1571dupAATG	NP_006437.3:p.Cys524Terfs					34											rs1419422245	1	PASS	3.97798e-06	1	251384	0	0	113692	0	0	2670	0	0	242	0	0	42186	0	0	11502	0	0	26130	0	0	30962	0	0
12:21370177	A/-	SLCO1B1	frameshift_variant	NM_006446.4:c.1623delA	NP_006437.3:p.Val542Serfs*2					25											rs769866848	1	PASS	3.97874e-06	1	251336	0	0	113666	0	0	2670	0	0	240	0	0	42178	0	0	11502	0	0	26134	0	0	30942	0	0
12:21370181	C/-	SLCO1B1	frameshift_variant	NM_006446.4:c.1626delC	NP_006437.3:p.Leu543Terfs					22.4											rs1565442029	1	PASS	3.97867e-06	1	251340	0	1	113664	0	0	2670	0	0	240	0	0	42178	0	0	11502	0	0	26134	0	1	30940	0	0
12:21370189	T/G	SLCO1B1	stop_gained	NM_006446.4:c.1634T>G	NP_006437.3:p.Leu545Ter	1 of 6 Predicted as Damaging	-0.353		0.7312	34											rs1193397714	1	PASS	3.97899e-06	1	251320	0	0	113646	0	0	2670	0	0	240	0	0	42164	0	0	11502	0	0	26132	0	0	30938	0	0
12:21370219	AT/-	SLCO1B1	frameshift_variant	NM_006446.4:c.1664_1665delAT	NP_006437.3:p.His555Argfs*6					23.9											rs1317938008	1	PASS	3.98102e-06	1	251192	0	0	113548	0	0	2670	0	0	240	0	0	42108	0	0	11494	0	0	26128	0	0	30908	0	1
12:21370234	-/TC	SLCO1B1	frameshift_variant	NM_006446.4:c.1679_1680insCT	NP_006437.3:p.Lys561Leufs*8					30											rs778238661	1	PASS	3.98444e-06	1	250976	0	0	113420	0	0	2670	0	0	240	0	0	42014	0	0	11488	0	0	26124	0	0	30884	0	0
12:21375278	C/G	SLCO1B1	stop_gained	NM_006446.4:c.1727C>G	NP_006437.3:p.Ser576Ter	1 of 6 Predicted as Damaging	0.864	0.002	3.8289	38											rs769014640	1	PASS	3.58886e-05	7	195048	0	0	93056	0	0	2652	0	0	184	0	0	26014	0	0	11350	0	0	26024	0	0	26832	0	0
12:21375295	C/-	SLCO1B1	stop_gained	NM_006446.4:c.1744delC	NP_006437.3:p.Leu582Terfs					28.9											rs771622519	1	PASS	6.23022e-06	1	160508	0	0	83064	0	0	2530	0	0	158	0	0	21306	0	0	10744	0	0	24898	0	0	23428	0	1
12:21377655	G/A	SLCO1B1	splice_acceptor_variant	NM_006446.4:c.1748-1G>A		2 of 6 Predicted as Damaging	5.19	1	10.1487	24	0.999932	0.766									rs1176615755	1	PASS	3.98321e-06	1	251054	0	1	113546	0	0	2668	0	0	242	0	0	42092	0	0	11496	0	0	26128	0	1	30920	0	0
12:21377660	A/-	SLCO1B1	frameshift_variant	NM_006446.4:c.1753delA	NP_006437.3:p.Ile585Phefs*2					33											rs1565443941	1	PASS	3.98302e-06	1	251066	0	1	113568	0	0	2668	0	0	242	0	0	42102	0	0	11498	0	0	26126	0	1	30932	0	0
12:21377677	A/-	SLCO1B1	frameshift_variant	NM_006446.4:c.1769delA	NP_006437.3:p.Tyr590Phefs*5					34											rs772679395	1	PASS	3.98121e-06	1	251180	0	0	113624	0	0	2668	0	0	242	0	0	42142	0	0	11502	0	0	26130	0	0	30940	0	1
12:21377774	G/T	SLCO1B1	splice_donor_variant	NM_006446.4:c.1865+1G>T		2 of 6 Predicted as Damaging	6.247	1	12.3674	25.7	0.999982	0.896									rs200994482	1	PASS	8.09723e-06	2	246998	0	1	111960	0	0	2662	0	0	242	0	0	41004	0	0	11462	0	0	26030	0	1	30560	0	0
12:21377774	G/A	SLCO1B1	splice_donor_variant	NM_006446.4:c.1865+1G>A		2 of 6 Predicted as Damaging	6.247	1	12.3674	25.8	0.99997	0.882									rs200994482	1	PASS	0.00026316	65	246998	0	4	111960	0	0	2662	0	0	242	0	1	41004	0	0	11462	0	2	26030	0	1	30560	0	2
12:21391924	T/A	SLCO1B1	stop_gained	NM_006446.4:c.1877T>A	NP_006437.3:p.Leu626Ter	1 of 6 Predicted as Damaging	0.069		7.336	35			Uncertain Significance	(1 Stars) Criteria Provided, Single Submitter							rs183624077	1	PASS	0.000229518	57	248346	0	0	112590	0	0	2660	0	0	240	0	0	41640	0	0	11410	0	0	26056	0	0	30584	0	1
12:21391951	CATCA/-	SLCO1B1	frameshift_variant	NM_006446.4:c.1905_1909delATCAC	NP_006437.3:p.Ser636Cysfs*30					24.2											rs774094004	1	PASS	4.03206e-06	1	248012	0	0	112506	0	0	2654	0	0	240	0	0	41666	0	0	11396	0	0	25986	0	0	30564	0	1
12:21391965	TATAT/-	SLCO1B1	frameshift_variant	NM_006446.4:c.1925_1929delTATTA	NP_006437.3:p.Ile642Asnfs*24					24.5											rs759508960	1	PASS	2.82792e-05	7	247532	0	6	111864	0	0	2638	0	0	240	0	2	41636	0	2	11376	0	0	25582	0	2	30392	0	0
12:21391973	ATTA/-	SLCO1B1	frameshift_variant	NM_006446.4:c.1929_1932delAATT	NP_006437.3:p.Leu643Phefs*4					26											rs1236039015	1	PASS	4.03988e-06	1	247532	0	1	111700	0	0	2626	0	0	240	0	1	41766	0	0	11380	0	0	25316	0	0	30372	0	0
12:21391975	T/G	SLCO1B1	stop_gained	NM_006446.4:c.1928T>G	NP_006437.3:p.Leu643Ter	1 of 6 Predicted as Damaging	2.633	0.063	8.086	36											rs754640873	1	PASS	4.04053e-06	1	247492	0	1	111678	0	0	2630	0	0	240	0	0	41754	0	1	11376	0	0	25312	0	0	30366	0	0
12:21392015	-/C	SLCO1B1	frameshift_variant	NM_006446.4:c.1968dupC	NP_006437.3:p.Asn657Glnfs*11					21.2											rs748791061	1	PASS	4.00567e-06	1	249646	0	1	112808	0	0	2658	0	0	240	0	1	41992	0	0	11436	0	0	25798	0	0	30684	0	0
12:21392021	AT/-	SLCO1B1	frameshift_variant	NM_006446.4:c.1974_1975delAT	NP_006437.3:p.Ser659Argfs*8					25.9											rs752880224	1	PASS	1.20039e-05	3	249918	0	0	112922	0	0	2656	0	0	240	0	0	42012	0	0	11438	0	0	25852	0	0	30724	0	3
12:21392023	C/G	SLCO1B1	stop_gained	NM_006446.4:c.1976C>G	NP_006437.3:p.Ser659Ter	1 of 6 Predicted as Damaging	0.301	0.562	4.6038	35			Uncertain Significance	(1 Stars) Criteria Provided, Single Submitter							rs745619193	1	PASS	2.80004e-05	7	249996	0	7	112974	0	0	2660	0	0	240	0	1	42024	0	0	11446	0	5	25856	0	1	30748	0	0
6:18130961	G/A	TPMT	stop_gained	NM_000367.4:c.676C>T	NP_000358.1:p.Arg226Ter	1 of 6 Predicted as Damaging	0.256	0.03	6.7648	36											rs761990479	1	PASS	2.78518e-05	7	251330	0	1	113664	0	0	2670	0	0	240	0	1	42180	0	0	11490	0	0	26128	0	0	30956	0	0
6:18130968	A/-	TPMT	frameshift_variant	NM_000367.4:c.669delT	NP_000358.1:p.Phe223Leufs*25					28.7											rs777235509	1	PASS	7.95754e-06	2	251334	0	2	113668	0	0	2670	0	0	240	0	1	42182	0	0	11490	0	0	26128	0	1	30958	0	0
6:18131013	T/C	TPMT	splice_acceptor_variant	NM_000367.4:c.626-2A>G		2 of 6 Predicted as Damaging	4.719	1	15.003	28.5	0.999946	0.934									rs1394523901	1	PASS	3.9801e-06	1	251250	0	0	113636	0	0	2670	0	0	240	0	0	42166	0	0	11484	0	0	26124	0	0	30952	0	0
6:18134035	C/T	TPMT	missense_variant	NM_000367.4:c.580G>A	NP_000358.1:p.Gly194Ser	6 of 6 Predicted as Damaging	4.513	1	13.3438	33	0.999995	1									rs758437011	1	PASS	4.23212e-06	1	236288	0	1	109288	0	0	2624	0	0	234	0	0	39984	0	0	11270	0	1	25608	0	0	29568	0	0
6:18139237	C/A	TPMT	missense_variant	NM_000367.4:c.451G>T	NP_000358.1:p.Asp151Tyr	6 of 6 Predicted as Damaging	5.233	1	19.4308	29											rs1354851110	1	PASS	3.97753e-06	1	251412	0	0	113708	0	0	2670	0	0	242	0	0	42202	0	0	11490	0	0	26134	0	0	30970	0	0
6:18139269	C/T	TPMT	splice_acceptor_variant	NM_000367.4:c.420-1G>A		2 of 6 Predicted as Damaging	5.233	0.957	19.4308	32	0.99999	0.936									rs762947310	1	PASS	2.38671e-05	6	251392	0	0	113706	0	0	2670	0	0	242	0	0	42196	0	0	11496	0	0	26130	0	0	30972	0	0
6:18139937	-/C	TPMT	frameshift_variant	NM_000367.4:c.378dupG	NP_000358.1:p.Asn127Glufs*11					27.3											rs1157568159	1	PASS	1.19471e-05	3	251108	0	0	113630	0	0	2666	0	0	240	0	0	42158	0	0	11490	0	0	26124	0	0	30952	0	0
6:18143826	C/T	TPMT	splice_donor_variant	NM_000367.4:c.366+1G>A		2 of 6 Predicted as Damaging	5.413	1	18.1281	30	0.999979	0.938									rs771977344	1	PASS	3.98206e-06	1	251126	0	1	113540	0	0	2668	0	0	240	0	0	42112	0	0	11482	0	1	26130	0	0	30908	0	0
6:18143872	G/C	TPMT	stop_gained	NM_000367.4:c.321C>G	NP_000358.1:p.Tyr107Ter	2 of 6 Predicted as Damaging	1.104	1	9.4075	35											rs753105368	1	PASS	3.98026e-06	1	251240	0	1	113594	0	0	2668	0	0	242	0	0	42134	0	0	11492	0	0	26128	0	1	30930	0	0
6:18143912	-/T	TPMT	frameshift_variant	NM_000367.4:c.281_282insA	NP_000358.1:p.Gly95Trpfs*28					33											rs755907755	1	PASS	3.97883e-06	1	251330	0	0	113668	0	0	2668	0	0	242	0	0	42176	0	0	11492	0	0	26126	0	0	30964	0	0
6:18148054	C/T	TPMT	stop_gained	NM_000367.4:c.233G>A	NP_000358.1:p.Trp78Ter	2 of 6 Predicted as Damaging	5.26	1	18.1183	47	0.999996	1									rs1393608525	1	PASS	3.98029e-06	1	251238	0	1	113664	0	0	2668	0	0	240	0	1	42166	0	0	11494	0	0	26130	0	0	30966	0	0
6:18148084	G/A	TPMT	missense_variant	NM_000367.4:c.203C>T	NP_000358.1:p.Pro68Leu	6 of 6 Predicted as Damaging	6.594	1	10.7222	24.1											rs1368439131	1	PASS	7.95874e-06	2	251296	0	0	113658	0	0	2668	0	0	240	0	0	42164	0	0	11494	0	0	26134	0	0	30958	0	0
6:18148096	CT/-	TPMT	frameshift_variant	NM_000367.4:c.190_191delAG	NP_000358.1:p.Arg64Glyfs*11					22.6											rs1561891883	1	PASS	3.97909e-06	1	251314	0	0	113686	0	0	2668	0	0	240	0	0	42180	0	0	11494	0	0	26134	0	0	30970	0	0
6:18148135	TTCT/-	TPMT	frameshift_variant	NM_000367.4:c.149_152delAGAA	NP_000358.1:p.Lys50Serfs*3					37											rs1561891932	1	PASS	3.98492e-06	1	250946	0	1	113590	0	0	2668	0	0	240	0	1	42110	0	0	11492	0	0	26126	0	0	30954	0	0
6:18148148	T/C	TPMT	splice_acceptor_variant	NM_000367.4:c.141-2A>G		2 of 6 Predicted as Damaging	5.406	1	14.3266	25.7	0.99998	0.788									rs764051627	1	PASS	2.00634e-05	5	249210	0	5	113124	0	0	2666	0	0	238	0	3	41904	0	0	11460	0	0	26080	0	2	30776	0	0
6:18149246	GTCTTGCCGTTCACCCACTT/-	TPMT	frameshift_variant	NM_000367.4:c.94_113del	NP_000358.1:p.Lys32Cysfs*20					34											rs1561892355	1,1	PASS	3.97744e-06	1	251418	0	0	113708	0	0	2668	0	0	242	0	0	42180	0	0	11500	0	0	26134	0	0	30984	0	0
6:18149263	CTTGT/-	TPMT	frameshift_variant	NM_000367.4:c.92_96delACAAG	NP_000358.1:p.Asp31Valfs*26					34											rs776967691	1	PASS	3.97697e-06	1	251448	0	1	113736	0	0	2668	0	0	242	0	0	42202	0	0	11502	0	1	26134	0	0	30988	0	0
6:18149403	C/T	TPMT	splice_acceptor_variant	NM_000367.4:c.-44-1G>A						22.2	0.999776	0.824									rs781515455	1	PASS	3.98575e-06	1	250894	0	1	113636	0	0	2668	0	0	242	0	0	42160	0	0	11492	0	0	26132	0	1	30942	0	0
2:234669011	TGCTGGGAAGATAC/-	UGT1A1	frameshift_variant	NM_000463.2:c.80_93delCTGGGAAGATACTG,NM_019075.2:c.856-6667_856-6654delCTGGGAAGATACTG,NM_019093.2:c.868-6667_868-6654delCTGGGAAGATACTG,NM_007120.2:c.868-6667_868-6654delCTGGGAAGATACTG,NM_019078.1:c.868-6667_868-6654delCTGGGAAGATACTG,NM_001072.3:c.862-6667_862-6654delCTGGGAAGATACTG,NM_019077.2:c.856-6667_856-6654delCTGGGAAGATACTG,NM_019076.4:c.856-6667_856-6654delCTGGGAAGATACTG,NM_021027.2:c.856-6…	NP_000454.1:p.Ala27Valfs*25,,,,,,,,					24.9											rs775463336	1	PASS	1.19489e-05	3	251070	0	0	113514	0	0	2670	0	0	240	0	0	42184	0	0	11482	0	0	26010	0	0	30928	0	3
2:234669026	G/-	UGT1A1	frameshift_variant	NM_000463.2:c.93delG,NM_019075.2:c.856-6654delG,NM_019093.2:c.868-6654delG,NM_007120.2:c.868-6654delG,NM_019078.1:c.868-6654delG,NM_001072.3:c.862-6654delG,NM_019077.2:c.856-6654delG,NM_019076.4:c.856-6654delG,NM_021027.2:c.856-6654delG	NP_000454.1:p.Leu32Terfs,,,,,,,,					22.8											rs1308601724	1	PASS	3.97953e-06	1	251286	0	0	113646	0	0	2670	0	0	240	0	0	42198	0	0	11488	0	0	26090	0	0	30960	0	0
2:234669053	G/A	UGT1A1	stop_gained	NM_000463.2:c.120G>A,NM_019075.2:c.856-6627G>A,NM_019093.2:c.868-6627G>A,NM_007120.2:c.868-6627G>A,NM_019078.1:c.868-6627G>A,NM_001072.3:c.862-6627G>A,NM_019077.2:c.856-6627G>A,NM_019076.4:c.856-6627G>A,NM_021027.2:c.856-6627G>A	NP_000454.1:p.Trp40Ter,,,,,,,,	2 of 6 Predicted as Damaging	9.819	1	20.6439	38											rs749423657	1	PASS	3.97905e-06	1	251316	0	1	113648	0	0	2670	0	0	240	0	0	42180	0	0	11486	0	0	26118	0	1	30954	0	0
2:234669155	C/A	UGT1A1	stop_gained	NM_000463.2:c.222C>A,NM_019075.2:c.856-6525C>A,NM_019093.2:c.868-6525C>A,NM_007120.2:c.868-6525C>A,NM_019078.1:c.868-6525C>A,NM_001072.3:c.862-6525C>A,NM_019077.2:c.856-6525C>A,NM_019076.4:c.856-6525C>A,NM_021027.2:c.856-6525C>A	NP_000454.1:p.Tyr74Ter,,,,,,,,	2 of 6 Predicted as Damaging	0.409	0.692	12.4386	36			Pathogenic	(1 Stars) Criteria Provided, Single Submitter,(1 Stars) Criteria Provided, Single Submitter	DM	"Crigler-Najjar_syndrome_1"					rs72551340	1	PASS	3.97703e-06	1	251444	0	1	113726	0	0	2670	0	0	242	0	0	42198	0	0	11504	0	0	26134	0	1	30978	0	0
2:234669281	-/A	UGT1A1	frameshift_variant	NM_000463.2:c.353dupA,NM_019075.2:c.856-6394dupA,NM_019093.2:c.868-6394dupA,NM_007120.2:c.868-6394dupA,NM_019078.1:c.868-6394dupA,NM_001072.3:c.862-6394dupA,NM_019077.2:c.856-6394dupA,NM_019076.4:c.856-6394dupA,NM_021027.2:c.856-6394dupA	NP_000454.1:p.Asp119Glyfs*28,,,,,,,,					20.4			Pathogenic	(0 Stars) No Assertion Criteria Provided,(1 Stars) Criteria Provided, Single Submitter	DM	"Crigler-Najjar_syndrome_1"					rs748219743	1	PASS	7.95874e-06	2	251296	0	0	113630	0	0	2670	0	0	242	0	0	42150	0	0	11492	0	0	26134	0	0	30942	0	0
2:234669450	C/-	UGT1A1	frameshift_variant	NM_000463.2:c.517delC,NM_019075.2:c.856-6230delC,NM_019093.2:c.868-6230delC,NM_007120.2:c.868-6230delC,NM_019078.1:c.868-6230delC,NM_001072.3:c.862-6230delC,NM_019077.2:c.856-6230delC,NM_019076.4:c.856-6230delC,NM_021027.2:c.856-6230delC	NP_000454.1:p.His173Metfs*32,,,,,,,,					14.61					DM	"Crigler-Najjar_syndrome_1"					rs773292758	1	PASS	3.98016e-06	1	251246	0	0	113654	0	0	2670	0	0	242	0	0	42162	0	0	11496	0	0	26134	0	0	30950	0	0
2:234669505	C/-	UGT1A1	frameshift_variant	NM_000463.2:c.573delC,NM_019075.2:c.856-6174delC,NM_019093.2:c.868-6174delC,NM_007120.2:c.868-6174delC,NM_019078.1:c.868-6174delC,NM_001072.3:c.862-6174delC,NM_019077.2:c.856-6174delC,NM_019076.4:c.856-6174delC,NM_021027.2:c.856-6174delC	NP_000454.1:p.Tyr192Thrfs*13,,,,,,,,					32											rs1205477836	1	PASS	3.97716e-06	1	251436	0	0	113748	0	0	2670	0	0	242	0	0	42212	0	0	11498	0	0	26134	0	0	30992	0	1
2:234669533	T/-	UGT1A1	frameshift_variant	NM_000463.2:c.601delT,NM_019075.2:c.856-6146delT,NM_019093.2:c.868-6146delT,NM_007120.2:c.868-6146delT,NM_019078.1:c.868-6146delT,NM_001072.3:c.862-6146delT,NM_019077.2:c.856-6146delT,NM_019076.4:c.856-6146delT,NM_021027.2:c.856-6146delT	NP_000454.1:p.Ser201Glnfs*4,,,,,,,,					20.4											rs763109127	1	PASS	3.97633e-06	1	251488	0	0	113766	0	0	2670	0	0	242	0	0	42220	0	0	11502	0	0	26134	0	0	30998	0	0
2:234669555	-/CAGC	UGT1A1	frameshift_variant	NM_000463.2:c.622_625dupCAGC,NM_019075.2:c.856-6125_856-6122dupCAGC,NM_019093.2:c.868-6125_868-6122dupCAGC,NM_007120.2:c.868-6125_868-6122dupCAGC,NM_019078.1:c.868-6125_868-6122dupCAGC,NM_001072.3:c.862-6125_862-6122dupCAGC,NM_019077.2:c.856-6125_856-6122dupCAGC,NM_019076.4:c.856-6125_856-6122dupCAGC,NM_021027.2:c.856-6125_856-6122dupCAGC	NP_000454.1:p.Arg209Profs*50,,,,,,,,					33			Pathogenic	(1 Stars) Criteria Provided, Single Submitter,(1 Stars) Criteria Provided, Single Submitter	DM	"Crigler-Najjar_syndrome_1"					rs766536479	1	PASS	1.19291e-05	3	251486	0	0	113760	0	0	2670	0	0	242	0	0	42218	0	0	11502	0	0	26134	0	0	30994	0	0
2:234669649	AG/-	UGT1A1	frameshift_variant	NM_000463.2:c.722_723delAG,NM_019075.2:c.856-6025_856-6024delAG,NM_019093.2:c.868-6025_868-6024delAG,NM_007120.2:c.868-6025_868-6024delAG,NM_019078.1:c.868-6025_868-6024delAG,NM_001072.3:c.862-6025_862-6024delAG,NM_019077.2:c.856-6025_856-6024delAG,NM_019076.4:c.856-6025_856-6024delAG,NM_021027.2:c.856-6025_856-6024delAG	NP_000454.1:p.Glu241Glyfs*16,,,,,,,,					25.1					DM	"Crigler-Najjar_syndrome_2"					rs797046091	1	PASS	3.98111e-06	1	251186	0	1	113464	0	0	2670	0	0	242	0	0	41954	0	0	11500	0	1	26134	0	0	30964	0	0
2:234669666	C/T	UGT1A1	stop_gained	NM_000463.2:c.733C>T,NM_019075.2:c.856-6014C>T,NM_019093.2:c.868-6014C>T,NM_007120.2:c.868-6014C>T,NM_019078.1:c.868-6014C>T,NM_001072.3:c.862-6014C>T,NM_019077.2:c.856-6014C>T,NM_019076.4:c.856-6014C>T,NM_021027.2:c.856-6014C>T	NP_000454.1:p.Gln245Ter,,,,,,,,	1 of 6 Predicted as Damaging	-0.267		11.7893	34			Uncertain Significance	(1 Stars) Criteria Provided, Single Submitter							rs1412278754	1	PASS	3.98861e-06	1	250714	0	1	113000	0	0	2670	0	0	242	0	1	41520	0	0	11502	0	0	26134	0	0	30932	0	0
2:234669695	G/A	UGT1A1	stop_gained	NM_000463.2:c.762G>A,NM_019075.2:c.856-5985G>A,NM_019093.2:c.868-5985G>A,NM_007120.2:c.868-5985G>A,NM_019078.1:c.868-5985G>A,NM_001072.3:c.862-5985G>A,NM_019077.2:c.856-5985G>A,NM_019076.4:c.856-5985G>A,NM_021027.2:c.856-5985G>A	NP_000454.1:p.Trp254Ter,,,,,,,,	2 of 6 Predicted as Damaging	9.819	1	19.5182	39											rs1344319848	1	PASS	4.00128e-06	1	249920	0	1	112212	0	0	2670	0	0	242	0	0	40796	0	0	11496	0	0	26134	0	1	30874	0	0
2:234669759	G/T	UGT1A1	missense_variant	NM_000463.2:c.826G>T,NM_019075.2:c.856-5921G>T,NM_019093.2:c.868-5921G>T,NM_007120.2:c.868-5921G>T,NM_019078.1:c.868-5921G>T,NM_001072.3:c.862-5921G>T,NM_019077.2:c.856-5921G>T,NM_019076.4:c.856-5921G>T,NM_021027.2:c.856-5921G>T	NP_000454.1:p.Gly276Cys,,,,,,,,	6 of 6 Predicted as Damaging	7.899	1	19.5182	27.8											rs72551345	1	PASS	4.01213e-06	1	249244	0	0	111542	0	0	2668	0	0	242	0	0	40200	0	0	11484	0	0	26134	0	0	30814	0	0
2:234669759	G/C	UGT1A1	missense_variant	NM_000463.2:c.826G>C,NM_019075.2:c.856-5921G>C,NM_019093.2:c.868-5921G>C,NM_007120.2:c.868-5921G>C,NM_019078.1:c.868-5921G>C,NM_001072.3:c.862-5921G>C,NM_019077.2:c.856-5921G>C,NM_019076.4:c.856-5921G>C,NM_021027.2:c.856-5921G>C	NP_000454.1:p.Gly276Arg,,,,,,,,	6 of 6 Predicted as Damaging	7.899	1	19.5182	26.8					DM	"Crigler-Najjar_syndrome_1"					rs72551345	1	PASS	8.02427e-06	2	249244	0	0	111542	0	0	2668	0	0	242	0	0	40200	0	0	11484	0	0	26134	0	0	30814	0	0
2:234669760	G/A	UGT1A1	missense_variant	NM_000463.2:c.827G>A,NM_019075.2:c.856-5920G>A,NM_019093.2:c.868-5920G>A,NM_007120.2:c.868-5920G>A,NM_019078.1:c.868-5920G>A,NM_001072.3:c.862-5920G>A,NM_019077.2:c.856-5920G>A,NM_019076.4:c.856-5920G>A,NM_021027.2:c.856-5920G>A	NP_000454.1:p.Gly276Asp,,,,,,,,	6 of 6 Predicted as Damaging	7.902	1	19.5182	26.4											rs570314042	1	PASS	4.0122e-06	1	249240	0	0	111538	0	0	2668	0	0	242	0	0	40200	0	0	11482	0	0	26134	0	0	30812	0	0
2:234669780	C/T	UGT1A1	stop_gained	NM_000463.2:c.847C>T,NM_019075.2:c.856-5900C>T,NM_019093.2:c.868-5900C>T,NM_007120.2:c.868-5900C>T,NM_019078.1:c.868-5900C>T,NM_001072.3:c.862-5900C>T,NM_019077.2:c.856-5900C>T,NM_019076.4:c.856-5900C>T,NM_021027.2:c.856-5900C>T	NP_000454.1:p.Gln283Ter,,,,,,,,	1 of 6 Predicted as Damaging	-0.418		10.6538	34					DM	"Hyperbilirubinaemia_unconjugated"					rs1160983011	1	PASS	8.026e-06	2	249190	0	2	111490	0	0	2668	0	0	242	0	0	40170	0	0	11468	0	0	26134	0	2	30808	0	0
2:234669799	T/C	UGT1A1	splice_donor_variant	NM_000463.2:c.864+2T>C,NM_019075.2:c.856-5881T>C,NM_019093.2:c.868-5881T>C,NM_007120.2:c.868-5881T>C,NM_019078.1:c.868-5881T>C,NM_001072.3:c.862-5881T>C,NM_019077.2:c.856-5881T>C,NM_019076.4:c.856-5881T>C,NM_021027.2:c.856-5881T>C	,,,,,,,,	2 of 6 Predicted as Damaging	3.297	1	15.5284	34	0.99994	0.864									rs772088902	1	PASS	4.01365e-06	1	249150	0	1	111452	0	0	2668	0	0	242	0	0	40162	0	0	11466	0	1	26132	0	0	30782	0	0
2:234675679	G/A	UGT1A1	splice_acceptor_variant	NM_000463.2:c.865-1G>A,NM_019075.2:c.856-1G>A,NM_019093.2:c.868-1G>A,NM_007120.2:c.868-1G>A,NM_019078.1:c.868-1G>A,NM_001072.3:c.862-1G>A,NM_019077.2:c.856-1G>A,NM_019076.4:c.856-1G>A,NM_021027.2:c.856-1G>A	,,,,,,,,	2 of 6 Predicted as Damaging	5.377	1	19.9089	34	0.99999	0.938			DM	"Crigler-Najjar_syndrome_2"					rs1285708223	1	PASS	4.01884e-06	1	248828	0	1	111276	0	0	2668	0	0	242	0	0	40100	0	0	11422	0	0	26132	0	1	30712	0	0
2:234675737	G/A	UGT1A1	missense_variant	NM_000463.2:c.922G>A,NM_019075.2:c.913G>A,NM_019093.2:c.925G>A,NM_007120.2:c.925G>A,NM_019078.1:c.925G>A,NM_001072.3:c.919G>A,NM_019077.2:c.913G>A,NM_019076.4:c.913G>A,NM_021027.2:c.913G>A	NP_000454.1:p.Gly308Arg,NP_061948.1:p.Gly305Arg,NP_061966.1:p.Gly309Arg,NP_009051.1:p.Gly309Arg,NP_061951.1:p.Gly309Arg,NP_001063.2:p.Gly307Arg,NP_061950.2:p.Gly305Arg,NP_061949.3:p.Gly305Arg,NP_066307.1:p.Gly305Arg	6 of 6 Predicted as Damaging	9.044	1	19.9089	32											rs746111352	1	PASS	4.016e-06	1	249004	0	1	111318	0	0	2668	0	0	242	0	0	40124	0	0	11424	0	0	26134	0	1	30726	0	0
2:234675738	G/A	UGT1A1	missense_variant	NM_000463.2:c.923G>A,NM_019075.2:c.914G>A,NM_019093.2:c.926G>A,NM_007120.2:c.926G>A,NM_019078.1:c.926G>A,NM_001072.3:c.920G>A,NM_019077.2:c.914G>A,NM_019076.4:c.914G>A,NM_021027.2:c.914G>A	NP_000454.1:p.Gly308Glu,NP_061948.1:p.Gly305Glu,NP_061966.1:p.Gly309Glu,NP_009051.1:p.Gly309Glu,NP_061951.1:p.Gly309Glu,NP_001063.2:p.Gly307Glu,NP_061950.2:p.Gly305Glu,NP_061949.3:p.Gly305Glu,NP_066307.1:p.Gly305Glu	6 of 6 Predicted as Damaging	9.044	1	19.9089	29			Pathogenic	(0 Stars) No Assertion Criteria Provided	DM	"Crigler-Najjar_syndrome_1"					rs62625011	1	PASS	1.2048e-05	3	249004	0	0	111320	0	0	2668	0	0	242	0	0	40124	0	0	11424	0	0	26134	0	0	30728	0	0
2:234675792	T/A	UGT1A1	stop_gained	NM_000463.2:c.977T>A,NM_019075.2:c.968T>A,NM_019093.2:c.980T>A,NM_007120.2:c.980T>A,NM_019078.1:c.980T>A,NM_001072.3:c.974T>A,NM_019077.2:c.968T>A,NM_019076.4:c.968T>A,NM_021027.2:c.968T>A	NP_000454.1:p.Leu326Ter,NP_061948.1:p.Leu323Ter,NP_061966.1:p.Leu327Ter,NP_009051.1:p.Leu327Ter,NP_061951.1:p.Leu327Ter,NP_001063.2:p.Leu325Ter,NP_061950.2:p.Leu323Ter,NP_061949.3:p.Leu323Ter,NP_066307.1:p.Leu323Ter	2 of 6 Predicted as Damaging	7.391	1	15.788	45					DM?	"Hyperbilirubinaemia_unconjugated"					rs372326047	1	PASS	4.01597e-06	1	249006	0	0	111326	0	0	2668	0	0	242	0	0	40128	0	0	11424	0	0	26134	0	0	30730	0	1
2:234676500	G/-	UGT1A1	frameshift_variant	NM_000463.2:c.1002delG,NM_019075.2:c.993delG,NM_019093.2:c.1005delG,NM_007120.2:c.1005delG,NM_019078.1:c.1005delG,NM_001072.3:c.999delG,NM_019077.2:c.993delG,NM_019076.4:c.993delG,NM_021027.2:c.993delG	NP_000454.1:p.Trp335Glyfs*31,NP_061948.1:p.Trp332Glyfs*31,NP_061966.1:p.Trp336Glyfs*31,NP_009051.1:p.Trp336Glyfs*31,NP_061951.1:p.Trp336Glyfs*31,NP_001063.2:p.Trp334Glyfs*31,NP_061950.2:p.Trp332Glyfs*31,NP_061949.3:p.Trp332Glyfs*31,NP_066307.1:p.Trp332Glyfs*31					7.877											rs1559414567	1	PASS	4.01519e-06	1	249054	0	1	111358	0	0	2668	0	0	242	0	1	40146	0	0	11426	0	0	26134	0	0	30742	0	0
2:234676505	-/GGTA	UGT1A1	stop_gained	NM_000463.2:c.1007_1010dupGGTA,NM_019075.2:c.998_1001dupGGTA,NM_019093.2:c.1010_1013dupGGTA,NM_007120.2:c.1010_1013dupGGTA,NM_019078.1:c.1010_1013dupGGTA,NM_001072.3:c.1004_1007dupGGTA,NM_019077.2:c.998_1001dupGGTA,NM_019076.4:c.998_1001dupGGTA,NM_021027.2:c.998_1001dupGGTA	NP_000454.1:p.Tyr337Terfs,NP_061948.1:p.Tyr334Terfs,NP_061966.1:p.Tyr338Terfs,NP_009051.1:p.Tyr338Terfs,NP_061951.1:p.Tyr338Terfs,NP_001063.2:p.Tyr336Terfs,NP_061950.2:p.Tyr334Terfs,NP_061949.3:p.Tyr334Terfs,NP_066307.1:p.Tyr334Terfs					35											rs778473109	1	PASS	8.03039e-06	2	249054	0	2	111358	0	0	2668	0	0	242	0	0	40146	0	0	11426	0	2	26134	0	0	30742	0	0
2:234676519	C/T	UGT1A1	stop_gained	NM_000463.2:c.1021C>T,NM_019075.2:c.1012C>T,NM_019093.2:c.1024C>T,NM_007120.2:c.1024C>T,NM_019078.1:c.1024C>T,NM_001072.3:c.1018C>T,NM_019077.2:c.1012C>T,NM_019076.4:c.1012C>T,NM_021027.2:c.1012C>T	NP_000454.1:p.Arg341Ter,NP_061948.1:p.Arg338Ter,NP_061966.1:p.Arg342Ter,NP_009051.1:p.Arg342Ter,NP_061951.1:p.Arg342Ter,NP_001063.2:p.Arg340Ter,NP_061950.2:p.Arg338Ter,NP_061949.3:p.Arg338Ter,NP_066307.1:p.Arg338Ter	1 of 6 Predicted as Damaging	-1.03		8.9926	35			Pathogenic, Affects	(0 Stars) No Assertion Criteria Provided,(0 Stars) No Assertion Criteria Provided	DM	"Crigler-Najjar_syndrome_1"					rs72551349	1	PASS	2.81066e-05	7	249052	0	2	111354	0	0	2668	0	0	242	0	1	40146	0	0	11424	0	0	26134	0	1	30740	0	0
2:234676526	C/A	UGT1A1	stop_gained	NM_000463.2:c.1028C>A,NM_019075.2:c.1019C>A,NM_019093.2:c.1031C>A,NM_007120.2:c.1031C>A,NM_019078.1:c.1031C>A,NM_001072.3:c.1025C>A,NM_019077.2:c.1019C>A,NM_019076.4:c.1019C>A,NM_021027.2:c.1019C>A	NP_000454.1:p.Ser343Ter,NP_061948.1:p.Ser340Ter,NP_061966.1:p.Ser344Ter,NP_009051.1:p.Ser344Ter,NP_061951.1:p.Ser344Ter,NP_001063.2:p.Ser342Ter,NP_061950.2:p.Ser340Ter,NP_061949.3:p.Ser340Ter,NP_066307.1:p.Ser340Ter	1 of 6 Predicted as Damaging	1.827	0.012	20.0384	37					DM?	"Crigler-Najjar_syndrome_2"					rs144978321	1	PASS	4.01519e-06	1	249054	0	0	111356	0	0	2668	0	0	242	0	0	40146	0	0	11426	0	0	26134	0	0	30740	0	0
2:234676540	A/-	UGT1A1	frameshift_variant	NM_000463.2:c.1043delA,NM_019075.2:c.1034delA,NM_019093.2:c.1046delA,NM_007120.2:c.1046delA,NM_019078.1:c.1046delA,NM_001072.3:c.1040delA,NM_019077.2:c.1034delA,NM_019076.4:c.1034delA,NM_021027.2:c.1034delA	NP_000454.1:p.Asn348Thrfs*18,NP_061948.1:p.Asn345Thrfs*18,NP_061966.1:p.Asn349Thrfs*18,NP_009051.1:p.Asn349Thrfs*18,NP_061951.1:p.Asn349Thrfs*18,NP_001063.2:p.Asn347Thrfs*18,NP_061950.2:p.Asn345Thrfs*18,NP_061949.3:p.Asn345Thrfs*18,NP_066307.1:p.Asn345Thrfs*18					34					DM	"Crigler-Najjar_syndrome_1"					rs745655794	1	PASS	1.20458e-05	3	249050	0	0	111354	0	0	2668	0	0	242	0	0	40146	0	0	11424	0	0	26134	0	0	30740	0	0
2:234676584	T/G	UGT1A1	splice_donor_variant	NM_000463.2:c.1084+2T>G,NM_019075.2:c.1075+2T>G,NM_019093.2:c.1087+2T>G,NM_007120.2:c.1087+2T>G,NM_019078.1:c.1087+2T>G,NM_001072.3:c.1081+2T>G,NM_019077.2:c.1075+2T>G,NM_019076.4:c.1075+2T>G,NM_021027.2:c.1075+2T>G	,,,,,,,,	2 of 6 Predicted as Damaging	7.446	1	16.1238	34	0.999988	0.954									rs779261748	1	PASS	4.01516e-06	1	249056	0	0	111358	0	0	2668	0	0	242	0	0	40146	0	0	11426	0	0	26134	0	0	30742	0	0
2:234676901	G/A	UGT1A1	missense_variant	NM_000463.2:c.1120G>A,NM_019075.2:c.1111G>A,NM_019093.2:c.1123G>A,NM_007120.2:c.1123G>A,NM_019078.1:c.1123G>A,NM_001072.3:c.1117G>A,NM_019077.2:c.1111G>A,NM_019076.4:c.1111G>A,NM_021027.2:c.1111G>A	NP_000454.1:p.Gly374Ser,NP_061948.1:p.Gly371Ser,NP_061966.1:p.Gly375Ser,NP_009051.1:p.Gly375Ser,NP_061951.1:p.Gly375Ser,NP_001063.2:p.Gly373Ser,NP_061950.2:p.Gly371Ser,NP_061949.3:p.Gly371Ser,NP_066307.1:p.Gly371Ser	6 of 6 Predicted as Damaging	9.49	1	20.2441	32											rs1276913504	1	PASS	4.01519e-06	1	249054	0	1	111358	0	0	2668	0	0	242	0	1	40146	0	0	11426	0	0	26134	0	0	30742	0	0
2:234676955	C/T	UGT1A1	missense_variant	NM_000463.2:c.1174C>T,NM_019075.2:c.1165C>T,NM_019093.2:c.1177C>T,NM_007120.2:c.1177C>T,NM_019078.1:c.1177C>T,NM_001072.3:c.1171C>T,NM_019077.2:c.1165C>T,NM_019076.4:c.1165C>T,NM_021027.2:c.1165C>T	NP_000454.1:p.Pro392Ser,NP_061948.1:p.Pro389Ser,NP_061966.1:p.Pro393Ser,NP_009051.1:p.Pro393Ser,NP_061951.1:p.Pro393Ser,NP_001063.2:p.Pro391Ser,NP_061950.2:p.Pro389Ser,NP_061949.3:p.Pro389Ser,NP_066307.1:p.Pro389Ser	6 of 6 Predicted as Damaging	7.337	1	20.2441	29.9			Uncertain Significance	(1 Stars) Criteria Provided, Single Submitter							rs1286993592	1	PASS	4.0151e-06	1	249060	0	1	111360	0	0	2668	0	0	242	0	0	40146	0	0	11426	0	0	26134	0	1	30744	0	0
2:234677000	A/-	UGT1A1	frameshift_variant	NM_000463.2:c.1220delA,NM_019075.2:c.1211delA,NM_019093.2:c.1223delA,NM_007120.2:c.1223delA,NM_019078.1:c.1223delA,NM_001072.3:c.1217delA,NM_019077.2:c.1211delA,NM_019076.4:c.1211delA,NM_021027.2:c.1211delA	NP_000454.1:p.Lys407Argfs*5,NP_061948.1:p.Lys404Argfs*5,NP_061966.1:p.Lys408Argfs*5,NP_009051.1:p.Lys408Argfs*5,NP_061951.1:p.Lys408Argfs*5,NP_001063.2:p.Lys406Argfs*5,NP_061950.2:p.Lys404Argfs*5,NP_061949.3:p.Lys404Argfs*5,NP_066307.1:p.Lys404Argfs*5					26.7					DM	"Crigler-Najjar_syndrome_1"					rs558109660	1	PASS	2.40914e-05	6	249052	0	5	111354	0	0	2668	0	0	242	0	5	40146	0	0	11426	0	0	26134	0	0	30738	0	1
2:234677002	-/G	UGT1A1	frameshift_variant	NM_000463.2:c.1223dupG,NM_019075.2:c.1214dupG,NM_019093.2:c.1226dupG,NM_007120.2:c.1226dupG,NM_019078.1:c.1226dupG,NM_001072.3:c.1220dupG,NM_019077.2:c.1214dupG,NM_019076.4:c.1214dupG,NM_021027.2:c.1214dupG	NP_000454.1:p.Ala409Serfs*13,NP_061948.1:p.Ala406Serfs*13,NP_061966.1:p.Ala410Serfs*13,NP_009051.1:p.Ala410Serfs*13,NP_061951.1:p.Ala410Serfs*13,NP_001063.2:p.Ala408Serfs*13,NP_061950.2:p.Ala406Serfs*13,NP_061949.3:p.Ala406Serfs*13,NP_066307.1:p.Ala406Serfs*13					26.8					DM	"Crigler-Najjar_syndrome_1"					rs758192306	1	PASS	8.0309e-06	2	249038	0	2	111342	0	0	2668	0	0	242	0	1	40136	0	1	11426	0	0	26134	0	0	30736	0	0
2:234677081	-/A	UGT1A1	frameshift_variant	NM_000463.2:c.1303dupA,NM_019075.2:c.1294dupA,NM_019093.2:c.1306dupA,NM_007120.2:c.1306dupA,NM_019078.1:c.1306dupA,NM_001072.3:c.1300dupA,NM_019077.2:c.1294dupA,NM_019076.4:c.1294dupA,NM_021027.2:c.1294dupA	NP_000454.1:p.Ser435Lysfs*74,NP_061948.1:p.Ser432Lysfs*74,NP_061966.1:p.Ser436Lysfs*74,NP_009051.1:p.Ser436Lysfs*74,NP_061951.1:p.Ser436Lysfs*74,NP_001063.2:p.Ser434Lysfs*74,NP_061950.2:p.Ser432Lysfs*74,NP_061949.3:p.Ser432Lysfs*74,NP_066307.1:p.Ser432Lysfs*74					35											rs1559415894	1	PASS	4.03848e-06	1	247618	0	0	110444	0	0	2654	0	0	240	0	0	39938	0	0	11308	0	0	25830	0	0	30474	0	0
2:234680956	GGTG/-	UGT1A1	frameshift_variant	NM_000463.2:c.1354_1357delGTGG,NM_019075.2:c.1345_1348delGTGG,NM_019093.2:c.1357_1360delGTGG,NM_007120.2:c.1357_1360delGTGG,NM_019078.1:c.1357_1360delGTGG,NM_001072.3:c.1351_1354delGTGG,NM_019077.2:c.1345_1348delGTGG,NM_019076.4:c.1345_1348delGTGG,NM_021027.2:c.1345_1348delGTGG	NP_000454.1:p.Val452Serfs*13,NP_061948.1:p.Val449Serfs*13,NP_061966.1:p.Val453Serfs*13,NP_009051.1:p.Val453Serfs*13,NP_061951.1:p.Val453Serfs*13,NP_001063.2:p.Val451Serfs*13,NP_061950.2:p.Val449Serfs*13,NP_061949.3:p.Val449Serfs*13,NP_066307.1:p.Val449Serfs*13					30											rs768601491	1	PASS	8.00564e-06	2	249824	0	2	112138	0	0	2670	0	0	242	0	0	40782	0	0	11464	0	2	26130	0	0	30850	0	0
2:234680993	T/-	UGT1A1	frameshift_variant	NM_000463.2:c.1392delT,NM_019075.2:c.1383delT,NM_019093.2:c.1395delT,NM_007120.2:c.1395delT,NM_019078.1:c.1395delT,NM_001072.3:c.1389delT,NM_019077.2:c.1383delT,NM_019076.4:c.1383delT,NM_021027.2:c.1383delT	NP_000454.1:p.Phe464Leufs*2,NP_061948.1:p.Phe461Leufs*2,NP_061966.1:p.Phe465Leufs*2,NP_009051.1:p.Phe465Leufs*2,NP_061951.1:p.Phe465Leufs*2,NP_001063.2:p.Phe463Leufs*2,NP_061950.2:p.Phe461Leufs*2,NP_061949.3:p.Phe461Leufs*2,NP_066307.1:p.Phe461Leufs*2					35											rs773231664	1	PASS	3.98861e-06	1	250714	0	0	113014	0	0	2670	0	0	242	0	0	41570	0	0	11468	0	0	26132	0	0	30932	0	0
2:234681120	C/-	UGT1A1	frameshift_variant	NM_000463.2:c.1518delC,NM_019075.2:c.1509delC,NM_019093.2:c.1521delC,NM_007120.2:c.1521delC,NM_019078.1:c.1521delC,NM_001072.3:c.1515delC,NM_019077.2:c.1509delC,NM_019076.4:c.1509delC,NM_021027.2:c.1509delC	NP_000454.1:p.Phe507Leufs,NP_061948.1:p.Phe504Leufs,NP_061966.1:p.Phe508Leufs,NP_009051.1:p.Phe508Leufs,NP_061951.1:p.Phe508Leufs,NP_001063.2:p.Phe506Leufs,NP_061950.2:p.Phe504Leufs,NP_061949.3:p.Phe504Leufs,NP_066307.1:p.Phe504Leufs					23.1											rs749363673	1	PASS	3.99939e-06	1	250038	0	0	112330	0	0	2670	0	0	242	0	0	40954	0	0	11468	0	0	26134	0	0	30862	0	0
2:234681170	C/T	UGT1A1	stop_gained	NM_000463.2:c.1567C>T,NM_019075.2:c.1558C>T,NM_019093.2:c.1570C>T,NM_007120.2:c.1570C>T,NM_019078.1:c.1570C>T,NM_001072.3:c.1564C>T,NM_019077.2:c.1558C>T,NM_019076.4:c.1558C>T,NM_021027.2:c.1558C>T	NP_000454.1:p.Arg523Ter,NP_061948.1:p.Arg520Ter,NP_061966.1:p.Arg524Ter,NP_009051.1:p.Arg524Ter,NP_061951.1:p.Arg524Ter,NP_001063.2:p.Arg522Ter,NP_061950.2:p.Arg520Ter,NP_061949.3:p.Arg520Ter,NP_066307.1:p.Arg520Ter	1 of 6 Predicted as Damaging	0.621		8.2468	36			Uncertain Significance	(1 Stars) Criteria Provided, Single Submitter,(1 Stars) Criteria Provided, Single Submitter	DM	"Crigler-Najjar_syndrome_2"					rs770564267	1	PASS	1.60518e-05	4	249194	0	3	111526	0	2	2668	0	0	242	0	0	40252	0	1	11462	0	0	26104	0	0	30798	0	0
16:31102521	G/T	VKORC1	missense_variant	NM_001311311.1:c.510C>A	NP_001298240.1:p.Asn170Lys	6 of 6 Predicted as Damaging	-0.149	0.592	21.2314	16.03											rs752029430	1	PASS	3.97991e-06	1	251262	0	1	113626	0	0	2668	0	0	242	0	0	42140	0	0	11502	0	0	26130	0	1	30944	0	0
16:31102664	C/A	VKORC1	splice_acceptor_variant	NM_001311311.1:c.368-1G>T		2 of 6 Predicted as Damaging	4.991	1	10.2293	29.7	0.999987	0.938									rs767852625	1	PASS	4.05219e-06	1	246780	0	1	111176	0	0	2638	0	0	234	0	0	41524	0	1	11100	0	0	25558	0	0	30122	0	0
16:31104636	A/T	VKORC1	missense_variant	NM_001311311.1:c.280T>A	NP_001298240.1:p.Leu94Ile	6 of 6 Predicted as Damaging	2.045,2.045	0.984,0.984	6.8085,6.8085	24.7											rs765419325	1	PASS	3.99776e-06	1	250140	0	1	112814	0	0	2664	0	0	236	0	1	41526	0	0	11456	0	0	26120	0	0	30812	0	0
16:31104655	G/T	VKORC1	missense_variant	NM_001311311.1:c.261C>A	NP_001298240.1:p.Phe87Leu	6 of 6 Predicted as Damaging	2.515,2.515	1,1	13.5813,13.5813	31											rs1385518753	1	PASS	3.9846e-06	1	250966	0	0	113350	0	0	2670	0	0	240	0	0	41922	0	0	11474	0	0	26132	0	0	30912	0	0
16:31104666	C/T	VKORC1	missense_variant	NM_001311311.1:c.250G>A	NP_001298240.1:p.Gly84Ser	6 of 6 Predicted as Damaging	6.275,6.275	1,1	14.5279,14.5279	26.8											rs751483513	1	PASS	3.98191e-06	1	251136	0	1	113466	0	0	2666	0	0	242	0	0	42014	0	0	11482	0	0	26132	0	1	30930	0	0
16:31104671	A/G	VKORC1	missense_variant	NM_001311311.1:c.245T>C	NP_001298240.1:p.Ile82Thr	6 of 6 Predicted as Damaging	7.469	1	15.8048	25											rs1454769993	1	PASS	3.98067e-06	1	251214	0	0	113522	0	0	2668	0	0	242	0	0	42052	0	0	11484	0	0	26132	0	0	30944	0	0
16:31104699	C/G	VKORC1	missense_variant	NM_001311311.1:c.217G>C	NP_001298240.1:p.Asp73His	6 of 6 Predicted as Damaging	2.08,2.08	0.955,0.955	10.2115,10.2115	25.9											rs1226775184	1	PASS	3.98007e-06	1	251252	0	0	113542	0	0	2668	0	0	242	0	0	42066	0	0	11490	0	0	26132	0	0	30944	0	0
16:31104707	A/T	VKORC1	missense_variant	NM_001311311.1:c.209T>A	NP_001298240.1:p.Leu70Gln	6 of 6 Predicted as Damaging	4.62	1	15.8048	29.7											rs1209106306	1	PASS	3.98e-06	1	251256	0	1	113550	0	0	2668	0	0	242	0	0	42068	0	0	11492	0	0	26134	0	1	30946	0	0
16:31104732	C/T	VKORC1	missense_variant	NM_001311311.1:c.184G>A	NP_001298240.1:p.Gly62Ser	6 of 6 Predicted as Damaging	6.275,6.275	1,1	19.6509,19.6509	31											rs1158890375	1	PASS	3.9853e-06	1	250922	0	0	113230	0	0	2668	0	0	240	0	0	41884	0	0	11448	0	0	26120	0	0	30870	0	0
16:31105894	G/A	VKORC1	missense_variant	NM_001311311.1:c.157C>T	NP_001298240.1:p.Arg53Cys	6 of 6 Predicted as Damaging	3.903	1	14.878	34											rs781304132	1	PASS	4.17073e-06	1	239766	0	0	106522	0	0	2370	0	0	208	0	0	39350	0	0	10950	0	0	25118	0	0	28526	0	0
16:31105894	G/T	VKORC1	missense_variant	NM_001311311.1:c.157C>A	NP_001298240.1:p.Arg53Ser	6 of 6 Predicted as Damaging	3.903	1	14.878	25.9											rs781304132	1	PASS	0.000108439	26	239766	0	0	106522	0	0	2370	0	0	208	0	0	39350	0	0	10950	0	0	25118	0	0	28526	0	0
16:31105896	G/T	VKORC1	stop_gained	NM_001311311.1:c.155C>A	NP_001298240.1:p.Ser52Ter	2 of 6 Predicted as Damaging	7.46	1	14.878	39											rs769806539	1	PASS	2.92137e-05	7	239614	0	0	106438	0	0	2354	0	0	208	0	0	39378	0	0	10934	0	0	25058	0	0	28506	0	0
16:31105897	A/-	VKORC1	frameshift_variant	NM_001311311.1:c.154delT	NP_001298240.1:p.Ser52Argfs*43					34											rs765076229	1	PASS	4.17338e-06	1	239614	0	0	106438	0	0	2354	0	0	208	0	0	39378	0	0	10934	0	0	25058	0	0	28506	0	1
16:31105925	G/-	VKORC1	frameshift_variant	NM_001311311.1:c.126delC	NP_001298240.1:p.Cys43Alafs*52					25.4											rs1266942541	1	PASS	4.28482e-06	1	233382	0	0	103500	0	0	2260	0	0	200	0	0	39056	0	0	10562	0	0	23944	0	0	27478	0	0
16:31105948	G/A	VKORC1	missense_variant	NM_001311311.1:c.103C>T	NP_001298240.1:p.Arg35Trp	6 of 6 Predicted as Damaging	2.704	1	14.878	33											rs762195886	1	PASS	4.39248e-06	1	227662	0	1	100990	0	0	2112	0	0	190	0	0	38814	0	0	10122	0	0	23066	0	1	26686	0	0
16:31105948	G/C	VKORC1	missense_variant	NM_001311311.1:c.103C>G	NP_001298240.1:p.Arg35Gly	6 of 6 Predicted as Damaging	2.704	1	14.878	25.3											rs762195886	1	PASS	1.31774e-05	3	227662	0	1	100990	0	0	2112	0	0	190	0	0	38814	0	0	10122	0	0	23066	0	1	26686	0	0
16:31105962	T/C	VKORC1	missense_variant	NM_001311311.1:c.89A>G	NP_001298240.1:p.Lys30Arg	6 of 6 Predicted as Damaging	4.482	1	11.9543	26.5											rs780403529	1	PASS	4.32717e-06	1	231098	0	0	102690	0	0	2090	0	0	190	0	0	39106	0	0	10462	0	0	23804	0	0	27038	0	0
16:31105967	G/C	VKORC1	missense_variant	NM_001311311.1:c.84C>G	NP_001298240.1:p.His28Gln	6 of 6 Predicted as Damaging	1.461	1	8.1355	23.3											rs755256488	1	PASS	4.32406e-06	1	231264	0	0	102924	0	0	2062	0	0	190	0	0	39116	0	0	10468	0	0	23916	0	0	27172	0	0
16:31105967	G/T	VKORC1	missense_variant	NM_001311311.1:c.84C>A	NP_001298240.1:p.His28Gln	6 of 6 Predicted as Damaging	1.461	1	8.1355	23.4											rs755256488	1	PASS	1.29722e-05	3	231264	0	0	102924	0	0	2062	0	0	190	0	0	39116	0	0	10468	0	0	23916	0	0	27172	0	0
16:31105974	G/T	VKORC1	missense_variant	NM_001311311.1:c.77C>A	NP_001298240.1:p.Ala26Glu	6 of 6 Predicted as Damaging	7.398	1	14.878	26											rs749184875	1	PASS	8.6408e-06	2	231460	0	1	102958	0	0	2050	0	0	192	0	1	39118	0	0	10506	0	0	23914	0	0	27178	0	0
16:31105987	G/A	VKORC1	missense_variant	NM_001311311.1:c.64C>T	NP_001298240.1:p.Leu22Phe	6 of 6 Predicted as Damaging	1.66	0.969	12.1807	22.3											rs759258204	1	PASS	8.60474e-06	2	232430	0	2	103592	0	0	2042	0	0	188	0	0	39250	0	0	10638	0	2	24228	0	0	27246	0	0
16:31105996	C/T	VKORC1	missense_variant	NM_001311311.1:c.55G>A	NP_001298240.1:p.Gly19Ser	6 of 6 Predicted as Damaging	5.881	0.995	14.8781	24.3											rs1163079898	1	PASS	4.29059e-06	1	233068	0	1	103842	0	0	2024	0	0	192	0	1	39258	0	0	10676	0	0	24378	0	0	27314	0	0
16:31106001	A/T	VKORC1	missense_variant	NM_001311311.1:c.50T>A	NP_001298240.1:p.Leu17Gln	6 of 6 Predicted as Damaging	3.115	0.449	7.0474	23.9											rs1158566246	1	PASS	4.29446e-06	1	232858	0	1	103786	0	0	2000	0	0	190	0	0	39258	0	0	10666	0	0	24416	0	1	27256	0	0
16:31106005	A/G	VKORC1	missense_variant	NM_001311311.1:c.46T>C	NP_001298240.1:p.Cys16Arg	6 of 6 Predicted as Damaging	5.235	1	11.9543	25.2											rs763546199	1	PASS	4.28064e-06	1	233610	0	1	104104	0	0	2018	0	0	190	0	0	39282	0	0	10732	0	0	24544	0	1	27338	0	0
[truncated: 29 more columns]

## Sheet: gnomAD_Genomes_LOF
Variant Info		RefSeq Genes 105 Interim v1, NCBI				dbNSFP Functional Prediction Voting	dbNSFP Functional Predictions and Scores 2.9, GHI			CADD Scores 1.4	dbscSNV Splice Altering Predictions 1.1, GHI		ClinVar 2019-11-01, NCBI		HGMD_PRO_2019.4		PharmGKB Variants 2019-06-19, GHI				dbSNP 153, NCBIrs3211371	Mappability_M150m2_hg19_Interval	gnomAD Genomes Variant Frequencies 3, BROAD
Chr:Pos	Ref/Alt	Gene Names	Sequence Ontology (Combined)	HGVS c. (Clinically Relevant)	HGVS p. (Clinically Relevant)	N of 6 Predicted Damaging	PhyloP 100way Vertebrate	PhastCons 100way Vertebrate	SiPhy 29way logOdds	PHRED Score	Ada Score	RF Score	Clinical Significance	Review Status	CLASS	PHEN	Drugs	Phenotype Category	Summary	Level of Evidence	Identifier	Mappability	Filter	#Alleles (AN)	AltAlleleFreqAF	Alt Allele Counts (AC)	Homozgyous Count (Hom)	AF_fin_male	AC_ami	AN_ami	AF_ami	nhomalt_ami	AC_oth	AN_oth	AF_oth	nhomalt_oth	AC_afr	AN_afr	AF_afr	nhomalt_afr	AC_sas	AN_sas	AF_sas	nhomalt_sas	AC_asj	AN_asj	AF_asj	nhomalt_asj	AC_fin
LOF/Missense variants listed in ClinVar/HGMD/PharmGKB in the context of drug response
19:41518370	C/T	CYP2B6	stop_gained	NM_000767.4:c.1132C>T	NP_000758.1:p.Arg378Ter	1 of 6 Predicted as Damaging	-0.553	0.003	5.8902	37			Drug Response	(0 Stars) No Assertion Criteria Provided	FP	"Impaired_efavirenz_metabolism"	efavirenz,non-nucleoside reverse transcriptase inhibitors	efficacy			rs34097093	1	PASS	143228	0.000132656	19	0	0	0	900	0	0	0	2154	0	0	16	42022	0.000380753	0	1	3044	0.000328515	0	0	3320	0	0	0
22:42523592	G/A	CYP2D6	stop_gained	NM_000106.5:c.1030C>T	NP_000097.3:p.Arg344Ter	1 of 6 Predicted as Damaging	-0.459		5.2667	35					FP	"Poor_metaboliser"					rs72549347	1	PASS	142788	0.000525254	75	1	0	0	898	0	0	2	2144	0.000932836	0	68	41758	0.00162843	0	2	3024	0.000661376	1	0	3324	0	0	0
22:42523855	G/A	CYP2D6	missense_variant	NM_000106.5:c.974C>T	NP_000097.3:p.Pro325Leu	6 of 6 Predicted as Damaging	5.439	1	12.9771	25.3					FP	"Poor_metaboliser"					rs140513104	1	PASS	142324	0.000217813	31	0	0	0	898	0	0	0	2140	0	0	10	41470	0.000241138	0	8	3026	0.00264375	0	4	3324	0.00120337	0	0
22:42526657	-/A	CYP2D6	frameshift_variant	NM_000106.5:c.137dupT	NP_000097.3:p.Leu47Alafs*207					24.7			Likely Benign	(1 Stars) Criteria Provided, Single Submitter	FP	"Poor_metaboliser"					rs774671100	1	PASS	141406	0.000289945	41	2	0.000126135	0	898	0	0	0	2118	0	0	13	40998	0.000317089	0	0	2970	0	0	0	3324	0	0	1
7:99264573	A/G	CYP3A5	splice_donor_variant	NM_000777.4:c.432+2T>C		2 of 6 Predicted as Damaging	6.447	1	10.6799	27.8	0.984783	0.574			FP	"Altered_gene_expression"					rs55965422	1	PASS	143194	0.000188555	27	0	0	0	900	0	0	0	2152	0	0	0	42002	0	0	0	3046	0	0	0	3320	0	0	0
7:99273811	-/C	CYP3A5	frameshift_variant	NM_000777.4:c.92dupG	NP_000768.1:p.Leu32Thrfs*3					16.6					DP	"CYP3A5_deficiency_association_with"						1	PASS	143216	0.0058513	838	5	0.00276174	0	900	0	0	17	2148	0.00791434	0	70	41994	0.0016669	0	21	3042	0.00690335	0	21	3318	0.00632911	0	25
1:97547921	T/C	DPYD	missense_variant	NM_000110.3:c.2872A>G	NP_000101.2:p.Lys958Glu	6 of 6 Predicted as Damaging	7.841	1	16.1779	29.8			Uncertain Significance	(1 Stars) Criteria Provided, Single Submitter	FP	"Reduced_enzyme_activity"	fluorouracil	metabolism/PK			rs141044036	1	PASS	143240	5.58503e-05	8	0	0	0	900	0	0	0	2152	0	0	0	42040	0	0	0	3046	0	0	0	3322	0	0	0
1:97564154	C/T	DPYD	missense_variant	NM_000110.3:c.2657G>A	NP_000101.2:p.Arg886His	6 of 6 Predicted as Damaging	3.778	1	13.4021	27.6			Uncertain Significance	(1 Stars) Criteria Provided, Single Submitter	DM	"Dihydropyrimidine_dehydrogenase_deficiency_partial"	,,fluorouracil	metabolism/PK,metabolism/PK,toxicity		,,	rs1801267	1	PASS	143088	2.79548e-05	4	0	0	0	900	0	0	0	2148	0	0	3	41990	7.14456e-05	0	0	3046	0	0	0	3322	0	0	0
1:97564155	G/A	DPYD	missense_variant	NM_000110.3:c.2656C>T	NP_000101.2:p.Arg886Cys	6 of 6 Predicted as Damaging	4.875	1	18.2848	32							fluorouracil	metabolism/PK			rs147545709	1	PASS	143104	0.000118795	17	0	0	0	900	0	0	1	2150	0.000465116	0	9	42000	0.000214286	0	1	3042	0.000328731	0	0	3322	0	0	1
1:97770839	G/A	DPYD	stop_gained	NM_000110.3:c.2275C>T	NP_000101.2:p.Arg759Ter	2 of 6 Predicted as Damaging	2.619	1	15.1226	36			Pathogenic/Likely Pathogenic	(2 Stars) Criteria Provided, Multiple Submitters, No Conflicts	DM	"Dihydropyrimidine_dehydrogenase_deficiency"					rs759372918	1	PASS	142878	4.19939e-05	6	0	0	0	900	0	0	0	2146	0	0	3	41940	7.15308e-05	0	0	3028	0	0	0	3314	0	0	0
1:97770928	G/A	DPYD	missense_variant	NM_000110.3:c.2186C>T	NP_000101.2:p.Ala729Val	6 of 6 Predicted as Damaging	9.416	1	19.8696	26.5			Uncertain Significance	(1 Stars) Criteria Provided, Single Submitter			fluorouracil	metabolism/PK			rs146529561	1	PASS	142896	1.39962e-05	2	0	0	0	900	0	0	0	2146	0	0	0	41968	0	0	0	3030	0	0	0	3320	0	0	0
1:97839117	CTGCCCACAGGCCAGG/-	DPYD	frameshift_variant	NM_000110.3:c.2043_2058del	NP_000101.2:p.Leu682Ilefs*24					35			Likely Pathogenic	(2 Stars) Criteria Provided, Multiple Submitters, No Conflicts	DM	"Dihydropyrimidine_dehydrogenase_deficiency"					rs773499329	1	PASS	143278	2.09383e-05	3	0	0	0	900	0	0	0	2154	0	0	0	42038	0	0	3	3046	0.000984898	0	0	3322	0	0	0
1:97839154	C/T	DPYD	missense_variant	NM_000110.3:c.2021G>A	NP_000101.2:p.Gly674Asp	6 of 6 Predicted as Damaging	7.094	1	19.9003	31					FP	"Reduced_enzyme_activity"	fluorouracil	metabolism/PK	Allele T is associated with decreased activity of DPYD when assayed with fluorouracil as compared to allele C.		rs137999090	1	PASS	143256	6.98051e-06	1	0	0	0	900	0	0	0	2152	0	0	1	42026	2.37948e-05	0	0	3042	0	0	0	3324	0	0	0
1:97839185	C/A	DPYD	missense_variant	NM_000110.3:c.1990G>T	NP_000101.2:p.Ala664Ser	6 of 6 Predicted as Damaging	7.094	1	19.9003	31							fluorouracil	metabolism/PK			rs138545885	1	PASS	143298	6.28062e-05	9	0	0	0	900	0	0	0	2152	0	0	9	42052	0.000214021	0	0	3040	0	0	0	3324	0	0	0
1:97915670	G/A	DPYD	missense_variant	NM_000110.3:c.1850C>T	NP_000101.2:p.Thr617Met	6 of 6 Predicted as Damaging	9.476	1	18.9863	27.1					DM?	"Dihydropyrimidine_dehydrogenase_deficiency"					rs753707032	1	PASS	143212	2.79306e-05	4	0	0	0	898	0	0	0	2152	0	0	1	42006	2.38061e-05	0	0	3046	0	0	0	3322	0	0	0
1:97915746	G/A	DPYD	missense_variant	NM_000110.3:c.1774C>T	NP_000101.2:p.Arg592Trp	6 of 6 Predicted as Damaging	6.363	1	18.9863	33			Uncertain Significance	(1 Stars) Criteria Provided, Single Submitter	DM	"Dihydropyrimidine_dehydrogenase_deficiency"	fluorouracil,fluorouracil	metabolism/PK,metabolism/PK		4,4	rs59086055	1	PASS	143170	5.58776e-05	8	0	0	0	900	0	0	0	2150	0	0	2	41990	4.76304e-05	0	0	3042	0	0	0	3322	0	0	0
1:97981341	G/A	DPYD	stop_gained	NM_000110.3:c.1681C>T	NP_000101.2:p.Arg561Ter	2 of 6 Predicted as Damaging	4.794	1	15.1674	42			Likely Pathogenic	(2 Stars) Criteria Provided, Multiple Submitters, No Conflicts	DM	"Dihydropyrimidine_dehydrogenase_deficiency"					rs1057516968	1	PASS	143020	3.49601e-05	5	0	0	0	900	0	0	0	2144	0	0	3	41992	7.14422e-05	0	0	3048	0	0	0	3314	0	0	0
1:97981371	C/T	DPYD	missense_variant	NM_000110.3:c.1651G>A	NP_000101.2:p.Ala551Thr	6 of 6 Predicted as Damaging	7.356	1	18.7723	29.1			Uncertain Significance	(2 Stars) Criteria Provided, Multiple Submitters, No Conflicts	DM	"Dihydropyrimidine_dehydrogenase_deficiency"	capecitabine	toxicity			rs777425216	1	PASS	143002	4.19575e-05	6	0	0	0	900	0	0	0	2146	0	0	2	41978	4.7644e-05	0	0	3042	0	0	0	3316	0	0	0
1:97981407	C/G	DPYD	missense_variant	NM_000110.3:c.1615G>C	NP_000101.2:p.Gly539Arg	6 of 6 Predicted as Damaging	5.654	1	14.1515	23.1							fluorouracil	metabolism/PK			rs142619737	1	PASS	143004	1.39856e-05	2	0	0	0	898	0	0	0	2148	0	0	0	41996	0	0	0	3038	0	0	0	3322	0	0	0
1:97981407	C/T	DPYD	missense_variant	NM_000110.3:c.1615G>A	NP_000101.2:p.Gly539Arg	6 of 6 Predicted as Damaging	5.654	1	14.1515	23.2			Not Provided	(0 Stars) No Assertion Provided	DM?	"Schizophrenia"	fluorouracil	metabolism/PK			rs142619737	1	PASS	143004	0.000482504	69	0	0	0	898	0	0	0	2148	0	0	65	41996	0.00154777	0	0	3038	0	0	0	3322	0	0	0
1:98015165	G/A	DPYD	missense_variant	NM_000110.3:c.1475C>T	NP_000101.2:p.Ser492Leu	6 of 6 Predicted as Damaging	9.403	1	20.8598	29.6			Uncertain Significance	(2 Stars) Criteria Provided, Multiple Submitters, No Conflicts	DM	"Dihydropyrimidine_dehydrogenase_deficiency"	fluorouracil,	metabolism/PK,other		,	rs72549304	1	PASS	143204	4.88813e-05	7	0	0	0	900	0	0	0	2150	0	0	5	42024	0.00011898	0	1	3042	0.000328731	0	0	3324	0	0	0
1:98015282	G/C	DPYD	missense_variant	NM_000110.3:c.1358C>G	NP_000101.2:p.Pro453Arg	6 of 6 Predicted as Damaging	9.403	1	20.8598	30			Not Provided	(0 Stars) No Assertion Provided			fluorouracil	metabolism/PK			rs144395748	1	PASS	143194	0.000307275	44	0	0	0	900	0	0	2	2150	0.000930233	0	42	42012	0.000999714	0	0	3044	0	0	0	3316	0	0	0
1:98015291	G/A	DPYD	missense_variant	NM_000110.3:c.1349C>T	NP_000101.2:p.Ala450Val	6 of 6 Predicted as Damaging	9.403	1	20.8598	25.8							fluorouracil	metabolism/PK			rs72975710	1	PASS	143196	0.000642476	92	0	0	0	898	0	0	1	2150	0.000465116	0	87	42008	0.00207103	0	0	3042	0	0	0	3322	0	0	0
1:98039341	A/C	DPYD	missense_variant	NM_000110.3:c.1314T>G	NP_000101.2:p.Phe438Leu	6 of 6 Predicted as Damaging	1.02	1	8.6137	23.2					FP	"Reduced_enzyme_activity"	fluorouracil	metabolism/PK			rs186169810	1	PASS	143224	2.09462e-05	3	0	0	0	900	0	0	0	2144	0	0	0	42034	0	0	0	3048	0	0	0	3320	0	0	0
1:98039454	C/T	DPYD	missense_variant	NM_000110.3:c.1201G>A	NP_000101.2:p.Gly401Arg	6 of 6 Predicted as Damaging	5.716	1	14.9729	23.9					FP	"Reduced_enzyme_activity"					rs1373691961	1	PASS	143212	1.39653e-05	2	0	0	0	900	0	0	0	2150	0	0	0	42022	0	0	0	3044	0	0	0	3324	0	0	0
1:98039499	C/A	DPYD	stop_gained	NM_000110.3:c.1156G>T	NP_000101.2:p.Glu386Ter	2 of 6 Predicted as Damaging	7.432	1	17.5523	43					DM	"Dihydropyrimidine_dehydrogenase_deficiency"	fluorouracil,fluorouracil,fluorouracil,fluorouracil	efficacy,metabolism/PK,toxicity,efficacy	Genotype CC is not associated with response to fluorouracil in children with Precursor Cell Lymphoblastic Leukemia-Lymphoma as compared to genotypes AA + AC.,Allele A is associated with decreased activity of DPYD when assayed with fluorouracil as compared to allele C.,Genotype CC is not associated with Drug Toxicity when treated with fluorouracil in children with Precursor Cell Lymphoblastic Leuk…	,,,	rs78060119	1	PASS	143248	6.9809e-06	1	0	0	0	900	0	0	0	2152	0	0	0	42038	0	0	0	3048	0	0	0	3322	0	0	0
1:98058899	C/T	DPYD	missense_variant	NM_000110.3:c.1003G>A	NP_000101.2:p.Val335Met	6 of 6 Predicted as Damaging	7.259	1	18.479	25.6					FP	"Reduced_enzyme_activity"	fluorouracil,,fluorouracil	metabolism/PK,other,metabolism/PK	Allele A is associated with decreased catalytic activity of DPYD when assayed with fluorouracil in 293FT cells as compared to allele C.,Allele A is associated with increased expression of DPYD protein in 293FT cells as compared to allele C.,Allele A is not associated with activity of DPYD when assayed with fluorouracil as compared to allele C.	4,4,4	rs72549306	1	PASS	143248	6.9809e-06	1	0	0	0	900	0	0	0	2154	0	0	1	42012	2.38027e-05	0	0	3048	0	0	0	3320	0	0	0
1:98060644	A/G	DPYD	missense_variant	NM_000110.3:c.929T>C	NP_000101.2:p.Leu310Ser	6 of 6 Predicted as Damaging	7.753	1	13.5118	28.2							fluorouracil	metabolism/PK	Allele G is not associated with activity of DPYD when assayed with fluorouracil as compared to allele A.		rs150437414	1	PASS	143252	6.98071e-06	1	0	0	0	900	0	0	0	2152	0	0	0	42028	0	0	0	3044	0	0	0	3324	0	0	0
1:98060722	C/A	DPYD	missense_variant	NM_000110.3:c.851G>T	NP_000101.2:p.Gly284Val	6 of 6 Predicted as Damaging	6.469	1	16.7583	33	0.999956	0.998			DM	"Dihydropyrimidine_dehydrogenase_deficiency"					rs777220476	1	PASS	143068	6.98968e-06	1	0	0	0	900	0	0	0	2150	0	0	0	41974	0	0	0	3034	0	0	0	3320	0	0	0
1:98157325	G/A	DPYD	missense_variant	NM_000110.3:c.710C>T	NP_000101.2:p.Pro237Leu	6 of 6 Predicted as Damaging	9.375	1	18.7184	26.9					DM	"Dihydropyrimidine_dehydrogenase_deficiency"		other			rs780025995	1	PASS	142914	2.09916e-05	3	0	0	0	900	0	0	0	2148	0	0	1	41886	2.38743e-05	0	0	3018	0	0	0	3322	0	0	0
1:98157332	G/A	DPYD	missense_variant	NM_000110.3:c.703C>T	NP_000101.2:p.Arg235Trp	6 of 6 Predicted as Damaging	4.365	1	14.1446	29.5			Drug Response	(3 Stars) Reviewed By Expert Panel	DM	"Dihydropyrimidine_dehydrogenase_deficiency"	,fluorouracil,capecitabine,fluorouracil	,metabolism/PK,toxicity		1A,1A,1A	rs1801266	1	PASS	142986	3.49685e-05	5	0	0	0	898	0	0	0	2146	0	0	0	41884	0	0	0	3026	0	0	0	3320	0	0	0
1:98164926	C/A	DPYD	stop_gained	NM_000110.3:c.661G>T	NP_000101.2:p.Glu221Ter	2 of 6 Predicted as Damaging	2.004	1	8.4118	39			Pathogenic/Likely Pathogenic	(2 Stars) Criteria Provided, Multiple Submitters, No Conflicts	DM	"Dihydropyrimidine_dehydrogenase_deficiency"					rs146170505	1	PASS	143180	6.98422e-06	1	0	0	0	900	0	0	0	2150	0	0	0	42032	0	0	0	3042	0	0	0	3324	0	0	0
1:98164986	T/G	DPYD	missense_variant	NM_000110.3:c.601A>C	NP_000101.2:p.Ser201Arg	6 of 6 Predicted as Damaging	7.664	1	15.5975	26.9					DM	"Dihydropyrimidine_dehydrogenase_deficiency"	fluorouracil,	metabolism/PK,other	Allele G is associated with decreased activity of DPYD when assayed with fluorouracil as compared to allele T.,Genotype GT is associated with Purine-Pyrimidine Metabolism, Inborn Errors.	,	rs72549308	1	PASS	143136	6.98636e-06	1	0	0	0	900	0	0	0	2152	0	0	1	42006	2.38061e-05	0	0	3036	0	0	0	3320	0	0	0
1:98165030	T/C	DPYD	missense_variant	NM_000110.3:c.557A>G	NP_000101.2:p.Tyr186Cys	6 of 6 Predicted as Damaging	3.782	1	10.818	25.9			Drug Response	(3 Stars) Reviewed By Expert Panel	DM	"Dihydropyrimidine_dehydrogenase_deficiency"	fluorouracil,,,fluorouracil,fluorouracil,fluorouracil	metabolism/PK,other,other,metabolism/PK,toxicity,toxicity		1A,1A,1A,1A,1A,1A	rs115232898	1	PASS	143186	0.00608998	872	11	0	0	900	0	0	11	2152	0.00511152	0	832	42024	0.0197982	11	0	3050	0	0	0	3324	0	0	0
1:98205947	C/T	DPYD	splice_donor_variant	NM_000110.3:c.321+1G>A		2 of 6 Predicted as Damaging	7.214	1	19.8102	34	0.999987	0.934			DM	"Dihydropyrimidine_dehydrogenase_deficiency"					rs746368304	1	PASS	143178	1.39686e-05	2	0	0	0	900	0	0	0	2152	0	0	0	42000	0	0	0	3048	0	0	0	3324	0	0	0
1:98205967	ATGA/-	DPYD	frameshift_variant	NM_000110.3:c.299_302delTCAT	NP_000101.2:p.Phe100Serfs*15					35					DM	"Dihydropyrimidine_dehydrogenase_deficiency"	fluorouracil	metabolism/PK	Allele T is not associated with activity of DPYD when assayed with fluorouracil as compared to allele C.	1A	rs72549309	1	PASS	143184	0.000118728	17	0	0	0	900	0	0	0	2150	0	0	0	42018	0	0	0	3046	0	0	0	3324	0	0	0
1:98205995	G/C	DPYD	missense_variant	NM_000110.3:c.274C>G	NP_000101.2:p.Pro92Ala	6 of 6 Predicted as Damaging	9.069	1	19.5135	23.7					FP	"Reduced_enzyme_activity"	fluorouracil	metabolism/PK			rs143986398	1	PASS	143126	7.68554e-05	11	0	0	0	900	0	0	0	2148	0	0	1	41986	2.38175e-05	0	0	3042	0	0	0	3318	0	0	0
1:98293695	G/A	DPYD	stop_gained	NM_000110.3:c.208C>T	NP_000101.2:p.Arg70Ter	2 of 6 Predicted as Damaging	4.334	1	15.7881	37			Pathogenic/Likely Pathogenic	(2 Stars) Criteria Provided, Multiple Submitters, No Conflicts	DM	"Dihydropyrimidine_dehydrogenase_deficiency"					rs141597515	1	PASS	143170	3.49235e-05	5	0	0	0	898	0	0	0	2150	0	0	3	42006	7.14184e-05	0	1	3048	0.000328084	0	0	3318	0	0	0
1:169483568	C/A	F5	missense_variant	NM_000130.4:c.6658G>T	NP_000121.2:p.Gly2220Cys	6 of 6 Predicted as Damaging	6.309	1	17.7466	31					DM	"Factor_V_deficiency"					rs770569683	1	PASS	143130	1.39733e-05	2	0	0	0	900	0	0	0	2148	0	0	0	41990	0	0	0	3040	0	0	0	3322	0	0	0
1:169483622	G/A	F5	missense_variant	NM_000130.4:c.6604C>T	NP_000121.2:p.Arg2202Cys	6 of 6 Predicted as Damaging	3.953	1	13.0971	32					DM	"Factor_V_deficiency"					rs754980174	1	PASS	143182	6.98412e-06	1	0	0	0	900	0	0	0	2148	0	0	1	41994	2.38129e-05	0	0	3044	0	0	0	3320	0	0	0
1:169484684	T/A	F5	stop_gained	NM_000130.4:c.6526A>T	NP_000121.2:p.Lys2176Ter	2 of 6 Predicted as Damaging	2.007	1	12.464	44	0.911218	0.718			DM	"Thrombocytopaenia"						1	PASS	143248	6.9809e-06	1	0	0	0	900	0	0	0	2150	0	0	0	42042	0	0	0	3046	0	0	0	3322	0	0	0
1:169487702	G/A	F5	missense_variant	NM_000130.4:c.6293C>T	NP_000121.2:p.Pro2098Leu	6 of 6 Predicted as Damaging	8.432	1	17.5417	28.2					DM	"Factor_V_deficiency"					rs1334042487	1	PASS	143140	1.39723e-05	2	0	0	0	900	0	0	0	2150	0	0	0	41984	0	0	0	3038	0	0	0	3318	0	0	0
1:169489772	C/T	F5	missense_variant	NM_000130.4:c.6179G>A	NP_000121.2:p.Gly2060Asp	6 of 6 Predicted as Damaging	6.745	1	19.6581	27.5			Uncertain Significance	(1 Stars) Criteria Provided, Single Submitter	DM	"Factor_V_deficiency"					rs1384690038	1	PASS	143250	6.9808e-06	1	0	0	0	900	0	0	0	2152	0	0	0	42020	0	0	0	3046	0	0	0	3320	0	0	0
1:169489812	G/A	F5	stop_gained	NM_000130.4:c.6139C>T	NP_000121.2:p.Arg2047Ter	1 of 6 Predicted as Damaging	-0.435		4.2599	36					DM	"Factor_V_deficiency"					rs1379054147	1	PASS	143224	6.98207e-06	1	0	0	0	900	0	0	0	2150	0	0	0	42006	0	0	0	3050	0	0	0	3322	0	0	0
1:169495162	G/A	F5	missense_variant	NM_000130.4:c.5693C>T	NP_000121.2:p.Thr1898Met	6 of 6 Predicted as Damaging	8.815	1	20.0784	31					DM	"Factor_V_deficiency"					rs367819569	1	PASS	143206	4.18977e-05	6	0	0	0	900	0	0	0	2148	0	0	3	42002	7.14252e-05	0	0	3046	0	0	0	3322	0	0	0
1:169497231	C/T	F5	missense_variant	NM_000130.4:c.5521G>A	NP_000121.2:p.Val1841Met	6 of 6 Predicted as Damaging	3.586	0.998	18.2122	27.1					DM	"Factor_V_deficiency"					rs142537705	1	PASS	143272	6.97973e-06	1	0	0	0	898	0	0	0	2152	0	0	0	42028	0	0	0	3050	0	0	0	3322	0	0	0
1:169498857	T/C	F5	missense_variant	NM_000130.4:c.5408A>G	NP_000121.2:p.His1803Arg	6 of 6 Predicted as Damaging	3.494	0.997	14.4611	24.5			Likely Pathogenic	(1 Stars) Criteria Provided, Single Submitter	DM	"Factor_V_deficiency"					rs754104059	1	PASS	143294	1.39573e-05	2	0	0	0	900	0	0	0	2150	0	0	0	42050	0	0	0	3046	0	0	0	3320	0	0	0
1:169500043	T/C	F5	missense_variant	NM_000130.4:c.5189A>G	NP_000121.2:p.Tyr1730Cys	6 of 6 Predicted as Damaging	7.609	1	15.604	33			Pathogenic	(1 Stars) Criteria Provided, Single Submitter	DM	"Factor_V_deficiency"					rs118203907	1	PASS	143326	1.39542e-05	2	0	0	0	900	0	0	0	2152	0	0	0	42054	0	0	0	3050	0	0	0	3324	0	0	0
1:169500056	G/A	F5	missense_variant	NM_000130.4:c.5176C>T	NP_000121.2:p.Arg1726Trp	6 of 6 Predicted as Damaging	2.229	0.99	13.1339	31					DM	"Factor_V_deficiency"					rs202197877	1	PASS	143310	6.97788e-06	1	0	0	0	900	0	0	0	2150	0	0	0	42050	0	0	0	3046	0	0	0	3324	0	0	0
1:169500195	-/T	F5	frameshift_variant	NM_000130.4:c.5037dupA	NP_000121.2:p.Ser1680Ilefs*8					35			Pathogenic	(1 Stars) Criteria Provided, Single Submitter	DM	"Factor_V_deficiency"					rs754982088	1	PASS	143216	1.39649e-05	2	0	0	0	900	0	0	0	2152	0	0	0	42016	0	0	0	3034	0	0	2	3322	0.000602047	0	0
1:169505815	G/A	F5	stop_gained	NM_000130.4:c.4900C>T	NP_000121.2:p.Arg1634Ter	2 of 6 Predicted as Damaging	4.085	0.999	5.9628	38					DM	"Factor_V_deficiency"					rs760525448	1	PASS	143164	6.985e-06	1	0	0	0	900	0	0	0	2148	0	0	1	42006	2.38061e-05	0	0	3038	0	0	0	3322	0	0	0
1:169510847	G/A	F5	stop_gained	NM_000130.4:c.3481C>T	NP_000121.2:p.Arg1161Ter	1 of 6 Predicted as Damaging	0.65	0.406	6.2912	36			Pathogenic	(0 Stars) No Assertion Criteria Provided	DM	"Factor_V_deficiency"					rs118203909	1	PASS	143246	6.981e-06	1	0	0	0	900	0	0	0	2150	0	0	1	42012	2.38027e-05	0	0	3042	0	0	0	3322	0	0	0
1:169510853	ACTC/-	F5	frameshift_variant	NM_000130.4:c.3472_3475delGAGT	NP_000121.2:p.Glu1158Metfs*12					23.8					DM	"Factor_V_deficiency"					rs1557915427	1	PASS	143258	6.98041e-06	1	0	0	0	900	0	0	0	2152	0	0	1	42032	2.37914e-05	0	0	3044	0	0	0	3324	0	0	0
1:169511240	G/A	F5	stop_gained	NM_000130.4:c.3088C>T	NP_000121.2:p.Arg1030Ter	2 of 6 Predicted as Damaging	4.22	1	15.6368	41					DM	"Factor_V_deficiency"					rs780253174	1	PASS	142978	4.89586e-05	7	0	0	0	900	0	0	0	2146	0	0	1	41970	2.38265e-05	0	0	3030	0	0	0	3322	0	0	0
1:169515769	T/G	F5	missense_variant	NM_000130.4:c.1673A>C	NP_000121.2:p.Tyr558Ser	6 of 6 Predicted as Damaging	7.552	1	16.8222	29.3					DM	"Factor_V_deficiency"					rs780922091	1	PASS	143312	6.97778e-06	1	0	0	0	900	0	0	0	2148	0	0	0	42056	0	0	0	3048	0	0	0	3324	0	0	0
1:169519224	G/A	F5	stop_gained	NM_000130.4:c.1426C>T	NP_000121.2:p.Gln476Ter	2 of 6 Predicted as Damaging	3.256	1	10.7191	36					DM	"Factor_V_deficiency"					rs1217039916	1	PASS	143252	6.98071e-06	1	0	0	0	900	0	0	0	2148	0	0	0	42004	0	0	0	3034	0	0	0	3320	0	0	0
1:169519953	G/A	F5	missense_variant	NM_000130.4:c.1321C>T	NP_000121.2:p.Arg441Cys	6 of 6 Predicted as Damaging	4.792	1	15.8565	25.1			Conflicting Interpretations Of Pathogenicity	(1 Star) Criteria Provided, Conflicting Interpretations	DM	"Factor_V_deficiency"					rs747006175	1	PASS	143140	2.09585e-05	3	0	0.000125786	0	900	0	0	0	2152	0	0	0	41960	0	0	0	3040	0	0	0	3324	0	0	2
1:169524526	T/A	F5	stop_gained	NM_000130.4:c.1012A>T	NP_000121.2:p.Lys338Ter	2 of 6 Predicted as Damaging	1.669	0.02	12.1646	36					DM	"Factor_V_deficiency"						1	PASS	143282	6.97924e-06	1	0	0	0	900	0	0	0	2152	0	0	0	42030	0	0	0	3048	0	0	0	3324	0	0	0
1:169525925	C/T	F5	missense_variant	NM_000130.4:c.911G>A	NP_000121.2:p.Gly304Glu	6 of 6 Predicted as Damaging	7.456	1	20.6439	28			Conflicting Interpretations Of Pathogenicity	(1 Star) Criteria Provided, Conflicting Interpretations	DM	"Factor_V_deficiency"					rs865947251	1	PASS	143208	2.09486e-05	3	0	0	0	898	0	0	0	2150	0	0	1	41980	2.38209e-05	0	0	3044	0	0	0	3324	0	0	0
1:169526051	G/A	F5	missense_variant	NM_000130.4:c.785C>T	NP_000121.2:p.Ser262Leu	6 of 6 Predicted as Damaging	9.434	1	20.6439	32					DM	"Factor_V_deficiency"					rs201865717	1	PASS	143200	2.09497e-05	3	0	0	0	900	0	0	0	2152	0	0	2	41998	4.76213e-05	0	0	3044	0	0	0	3324	0	0	0
1:169528474	G/A	F5	missense_variant	NM_000130.4:c.647C>T	NP_000121.2:p.Ala216Val	6 of 6 Predicted as Damaging	4.025	1	16.8286	26.6					DM?	"Factor_V_deficiency"					rs768038673	1	PASS	143188	6.98383e-06	1	0	0	0	900	0	0	0	2150	0	0	0	41988	0	0	0	3046	0	0	0	3322	0	0	0
1:169529812	G/A	F5	missense_variant	NM_000130.4:c.566C>T	NP_000121.2:p.Pro189Leu	6 of 6 Predicted as Damaging	6.465	1	19.1602	24.9					DM	"Factor_V_deficiency"					rs141800405	1	PASS	143120	0.000265511	38	0	0	0	900	0	0	0	2150	0	0	37	41980	0.000881372	0	0	3042	0	0	0	3320	0	0	0
1:169529854	T/C	F5	missense_variant	NM_000130.4:c.524A>G	NP_000121.2:p.His175Arg	6 of 6 Predicted as Damaging	6.043	1	11.4854	23.6			Uncertain Significance	(2 Stars) Criteria Provided, Multiple Submitters, No Conflicts	DM	"Factor_V_deficiency"					rs201510575	1	PASS	143186	0.000258405	37	0	0	0	900	0	0	0	2150	0	0	6	42004	0.000142844	0	14	3050	0.00459016	0	0	3320	0	0	0
1:169541477	A/T	F5	missense_variant	NM_000130.4:c.355T>A	NP_000121.2:p.Tyr119Asn	6 of 6 Predicted as Damaging	5.745	1	13.7387	27.6					DM	"Factor_V_deficiency"					rs1318995804	1	PASS	143282	2.09377e-05	3	0	0	0	900	0	0	0	2154	0	0	0	42058	0	0	0	3040	0	0	0	3322	0	0	0
1:169541546	C/G	F5	missense_variant	NM_000130.4:c.286G>C	NP_000121.2:p.Asp96His	6 of 6 Predicted as Damaging	4.812	1	16.5806	26					DM	"Factor_V_deficiency"					rs747215273	1	PASS	143196	1.39669e-05	2	0	0	0	900	0	0	0	2150	0	0	0	42012	0	0	0	3044	0	0	0	3322	0	0	0
1:169541549	C/T	F5	missense_variant	NM_000130.4:c.283G>A	NP_000121.2:p.Gly95Arg	6 of 6 Predicted as Damaging	4.812	1	16.9823	27.1					DM	"Factor_V_deficiency"					rs376110672	1	PASS	143150	4.88998e-05	7	0	0	0	900	0	0	0	2146	0	0	4	41992	9.52562e-05	0	0	3040	0	0	0	3324	0	0	0
12:21294563	A/T	SLCO1B1	stop_gained	NM_006446.4:c.55A>T	NP_006437.3:p.Lys19Ter	1 of 6 Predicted as Damaging	0.125		3.7085	29.6					DM	"OATP1B1_deficiency"					rs376829525	1	PASS	143134	5.58917e-05	8	0	0	0	898	0	0	0	2150	0	0	8	42010	0.000190431	0	0	3052	0	0	0	3320	0	0	0
12:21375233	G/T	SLCO1B1	splice_acceptor_variant	NM_006446.4:c.1683-1G>T		2 of 6 Predicted as Damaging	5.871	1	12.5074	25.5	0.999988	0.922			FP	"OATP1B1_deficiency"					rs757392414	1	PASS	127706	2.34915e-05	3	0	0	0	870	0	0	0	1912	0	0	0	36580	0	0	0	2860	0	0	0	3230	0	0	0
12:21375289	C/T	SLCO1B1	stop_gained	NM_006446.4:c.1738C>T	NP_006437.3:p.Arg580Ter	2 of 6 Predicted as Damaging	1.039	0.621	12.8754	42			Conflicting Interpretations Of Pathogenicity	(1 Star) Criteria Provided, Conflicting Interpretations	FP	"OATP1B1_deficiency"					rs71581941	1	PASS	92678	0.00146745	136	1	0.000755287	0	730	0	0	1	1256	0.000796178	0	24	24682	0.000972369	0	0	2240	0	0	8	2872	0.00278552	0	4
6:18130989	A/T	TPMT	stop_gained	NM_000367.4:c.648T>A	NP_000358.1:p.Cys216Ter	2 of 6 Predicted as Damaging	3.014	0.994	7.4326	35			Not Provided	(0 Stars) No Assertion Provided	DM	"TPMT_deficiency"					rs398122996	1	PASS	143308	6.97798e-06	1	0	0	0	900	0	0	0	2154	0	0	0	42044	0	0	0	3048	0	0	0	3324	0	0	0
6:18131012	C/T	TPMT	splice_acceptor_variant	NM_000367.4:c.626-1G>A		2 of 6 Predicted as Damaging	4.597	1	15.9448	26.1	0.999977	0.948	Drug Response	(0 Stars) No Assertion Criteria Provided	DP	"TPMT_deficiency_association_with"					rs1800584	1	PASS	143214	2.09477e-05	3	0	0	0	900	0	0	0	2152	0	0	0	42004	0	0	0	3050	0	0	0	3324	0	0	0
6:18134118	T/C	TPMT	missense_variant	NM_000367.4:c.497A>G	NP_000358.1:p.Tyr166Cys	6 of 6 Predicted as Damaging	4.589	1	13.0508	24.6			Drug Response	(0 Stars) No Assertion Criteria Provided							rs201695576	1	PASS	143208	6.98285e-06	1	0	0	0	900	0	0	0	2154	0	0	0	42016	0	0	0	3050	0	0	0	3324	0	0	0
6:18134121	C/T	TPMT	splice_acceptor_variant	NM_000367.4:c.495-1G>A		2 of 6 Predicted as Damaging	4.47	1	12.0363	25.1	0.999976	0.76			DP	"TPMT_deficiency_association_with"					rs9333570	1	PASS	143180	1.39684e-05	2	0	0	0	900	0	0	0	2154	0	0	0	41996	0	0	0	3048	0	0	0	3324	0	0	0
6:18143901	C/A	TPMT	stop_gained	NM_000367.4:c.292G>T	NP_000358.1:p.Glu98Ter	2 of 6 Predicted as Damaging	3.68	1	18.2496	41			Uncertain Significance	(1 Stars) Criteria Provided, Single Submitter	DP	"TPMT_deficiency_association_with"					rs72552739	1	PASS	143270	0.000174496	25	0	0	0	900	0	0	0	2148	0	0	2	42040	4.75737e-05	0	0	3046	0	0	0	3324	0	0	0
6:18148076	C/T	TPMT	missense_variant	NM_000367.4:c.211G>A	NP_000358.1:p.Gly71Arg	6 of 6 Predicted as Damaging	5.26	1	18.1183	26.7					FP	"Reduced_expression"					rs777686348	1	PASS	142980	1.3988e-05	2	0	0	0	900	0	0	0	2148	0	0	0	41914	0	0	0	3042	0	0	0	3318	0	0	0
6:18149264	-/T	TPMT	frameshift_variant	NM_000367.4:c.95dupA	NP_000358.1:p.Trp33Valfs*26					32			Drug Response	(0 Stars) No Assertion Criteria Provided							rs759836180	1	PASS	143320	0.000118616	17	0	0.00188206	0	900	0	0	0	2154	0	0	0	42060	0	0	0	3050	0	0	0	3322	0	0	17
16:31104686	T/C	VKORC1	missense_variant	NM_001311311.1:c.230A>G	NP_001298240.1:p.Asn77Ser	6 of 6 Predicted as Damaging	6.451	1	15.8048	26.7					DM	"Oral_anticoagulant_resistance"						1	PASS	143298	6.97846e-06	1	0	0	0	898	0	0	0	2150	0	0	0	42048	0	0	0	3050	0	0	0	3324	0	0	0
16:31104720	C/T	VKORC1	missense_variant	NM_001311311.1:c.196G>A	NP_001298240.1:p.Val66Met	6 of 6 Predicted as Damaging	1.452,1.452	1,1	19.6509,19.6509	29.7			Pathogenic	(1 Stars) Criteria Provided, Single Submitter	DM	"Warfarin_resistance"	warfarin,warfarin,warfarin,warfarin	dosage,dosage,dosage,efficacy		,,,	rs72547529	1	PASS	143274	0.000837556	120	0	0	0	900	0	0	1	2150	0.000465116	0	114	42032	0.00271222	0	0	3036	0	0	0	3324	0	0	0
16:31105966	C/A	VKORC1	missense_variant	NM_001311311.1:c.85G>T	NP_001298240.1:p.Val29Leu	6 of 6 Predicted as Damaging	5.929	1	14.8781	27.5			Pathogenic	(0 Stars) No Assertion Criteria Provided	DM	"Warfarin_resistance"	warfarin,warfarin	dosage,dosage		4,4	rs104894539	1	PASS	143366	1.39503e-05	2	0	0	0	900	0	0	0	2154	0	0	0	42066	0	0	0	3050	0	0	0	3324	0	0	0
16:31105972	G/C	VKORC1	missense_variant	NM_001311311.1:c.79C>G	NP_001298240.1:p.Leu27Val	6 of 6 Predicted as Damaging	2.046	0.981	5.1669	23.6					DM	"Fluindione_resistance"					rs549914326	1	PASS	143370	6.27746e-05	9	0	0	0	900	0	0	1	2154	0.000464253	0	0	42072	0	0	4	3052	0.00131062	0	0	3324	0	0	0
LOF/Missense variants not listed in ClinVar/HGMD/PharmGKB in the context of drug response
19:41497258	GCTACTCCTG/-	CYP2B6	frameshift_variant	NM_000767.4:c.49_58delCTACTCCTGG	NP_000758.1:p.Leu17Phefs*37					17.84											rs1164876905	1	PASS	143196	6.98344e-06	1	0	0	0	900	0	0	0	2150	0	0	0	41970	0	0	0	3042	0	0	0	3318	0	0	0
19:41497280	-/T	CYP2B6	frameshift_variant	NM_000767.4:c.69_70insT	NP_000758.1:p.Pro24Serfs*2					0.244												1	PASS	143190	6.98373e-06	1	0	0	0	900	0	0	0	2152	0	0	0	41970	0	0	0	3042	0	0	0	3324	0	0	0
19:41497293	-/GC	CYP2B6	frameshift_variant	NM_000767.4:c.82_83insGC	NP_000758.1:p.Asp28Glyfs*30					18.82											rs781463375	1	PASS	143162	0.00810271	1160	16	0	0	900	0	0	9	2150	0.00418605	0	1113	41954	0.0265291	16	0	3040	0	0	0	3322	0	0	0
19:41497294	GC/-	CYP2B6	frameshift_variant	NM_000767.4:c.84_85delGC	NP_000758.1:p.Asp28Glufs*20					14.29												1	PASS	143212	0.00810686	1161	17	0	0	900	0	0	9	2150	0.00418605	0	1114	41970	0.0265428	17	0	3046	0	0	0	3324	0	0	0
19:41510070	T/C	CYP2B6	splice_donor_variant	NM_000767.4:c.334+2T>C		2 of 6 Predicted as Damaging	4.864	1	11.0112	24.3	0.999959	0.952									rs373926269	1	PASS	98262	0.000111946	11	0	0	0	812	0	0	0	1368	0	0	11	26222	0.000419495	0	0	2092	0	0	0	2786	0	0	0
19:41510243	C/T	CYP2B6	stop_gained	NM_000767.4:c.376C>T	NP_000758.1:p.Arg126Ter	1 of 6 Predicted as Damaging	-1.538		3.9475	35											rs370958436	1	PASS	143054	6.99037e-06	1	0	0	0	900	0	0	0	2152	0	0	0	41906	0	0	1	3028	0.000330251	0	0	3324	0	0	0
19:41510297	G/T	CYP2B6	stop_gained	NM_000767.4:c.430G>T	NP_000758.1:p.Glu144Ter	2 of 6 Predicted as Damaging	1.786	1	9.1616	40											rs117323987	1	PASS	143190	5.58698e-05	8	0	0	0	900	0	0	1	2150	0.000465116	0	0	41944	0	0	0	3042	0	0	0	3324	0	0	0
19:41512809	G/T	CYP2B6	splice_acceptor_variant	NM_000767.4:c.485-1G>T		2 of 6 Predicted as Damaging	7.732	1	14.7449	24.4	0.999965	0.936										1	PASS	143106	6.98783e-06	1	0	0	0	900	0	0	0	2146	0	0	0	41920	0	0	0	3036	0	0	0	3324	0	0	0
19:41512884	C/T	CYP2B6	stop_gained	NM_000767.4:c.559C>T	NP_000758.1:p.Arg187Ter	2 of 6 Predicted as Damaging	2.14	0.936	10.2664	38											rs201793417	1	PASS	143198	2.095e-05	3	0	0	0	898	0	0	0	2154	0	0	2	41948	4.76781e-05	0	0	3044	0	0	0	3324	0	0	0
19:41512939	-/C	CYP2B6	frameshift_variant	NM_000767.4:c.614dupC	NP_000758.1:p.Ser207Phefs*12					15.66											rs767152539	1	PASS	143206	4.18977e-05	6	0	0	0	900	0	0	1	2150	0.000465116	0	1	41968	2.38277e-05	0	0	3046	0	0	0	3324	0	0	0
19:41512945	-/C	CYP2B6	frameshift_variant	NM_000767.4:c.620dupC	NP_000758.1:p.Leu208Thrfs*11					22											rs1319178320	1	PASS	143256	6.98051e-06	1	0	0	0	898	0	0	0	2154	0	0	0	41988	0	0	0	3046	0	0	0	3320	0	0	0
19:41515301	G/A	CYP2B6	splice_donor_variant	NM_000767.4:c.822+1G>A		2 of 6 Predicted as Damaging	5.955	1	10.0109	22.3	0.999562											1	PASS	141762	7.05408e-06	1	0	0.000127877	0	894	0	0	0	2128	0	0	0	41418	0	0	0	2902	0	0	0	3308	0	0	1
19:41515981	C/A	CYP2B6	missense_variant	NM_000767.4:c.905C>A	NP_000758.1:p.Thr302Asn	6 of 6 Predicted as Damaging	4.094	0.998	10.7582	24.5											rs1261998210	1	PASS	143286	6.97905e-06	1	0	0	0	900	0	0	0	2150	0	0	0	42036	0	0	0	3042	0	0	1	3322	0.000301023	0	0
19:41518265	C/T	CYP2B6	stop_gained	NM_000767.4:c.1027C>T	NP_000758.1:p.Arg343Ter	1 of 6 Predicted as Damaging	-0.434	0.071	11.3729	39											rs201134384	1	PASS	143220	0.000146628	21	0	0	0	900	0	0	1	2150	0.000465116	0	3	42002	7.14252e-05	0	0	3038	0	0	11	3324	0.00330927	0	0
19:41522723	G/-	CYP2B6	frameshift_variant	NM_000767.4:c.1467delG	NP_000758.1:p.Arg491Alafs					0.231												1	PASS	143236	5.58519e-05	8	0	0	0	900	0	0	0	2152	0	0	0	42020	0	0	0	3040	0	0	0	3324	0	0	0
10:96522592	C/T	CYP2C19	stop_gained	NM_000769.2:c.130C>T	NP_000760.1:p.Gln44Ter	1 of 6 Predicted as Damaging	0.32	0.007	9.4279	35											rs747911797	1	PASS	143248	6.9809e-06	1	0	0	0	900	0	0	0	2150	0	0	1	42038	2.3788e-05	0	0	3048	0	0	0	3322	0	0	0
10:96535174	G/A	CYP2C19	stop_gained	NM_000769.2:c.359G>A	NP_000760.1:p.Trp120Ter	2 of 6 Predicted as Damaging	6.411	1	10.5565	41												1	PASS	143242	6.98119e-06	1	0	0.000125945	0	898	0	0	0	2148	0	0	0	42028	0	0	0	3042	0	0	0	3320	0	0	1
10:96535278	G/T	CYP2C19	stop_gained	NM_000769.2:c.463G>T	NP_000760.1:p.Glu155Ter	1 of 6 Predicted as Damaging	0.547	0.072	10.1418	39											rs374036992	1	PASS	143244	1.39622e-05	2	0	0	0	900	0	0	0	2154	0	0	0	42048	0	0	0	3046	0	0	0	3322	0	0	0
10:96535282	T/A	CYP2C19	stop_gained	NM_000769.2:c.467T>A	NP_000760.1:p.Leu156Ter	2 of 6 Predicted as Damaging	3.73	0.555	11.0095	38											rs1157042274	1	PASS	143182	1.39682e-05	2	0	0	0	898	0	0	0	2154	0	0	2	42022	4.75941e-05	0	0	3042	0	0	0	3316	0	0	0
10:96540255	G/T	CYP2C19	splice_acceptor_variant	NM_000769.2:c.482-1G>T		2 of 6 Predicted as Damaging	7.375	1	13.9288	23.9	0.999973	0.928									rs1194178489	1	PASS	143106	6.98783e-06	1	0	0	0	900	0	0	0	2148	0	0	1	41992	2.38141e-05	0	0	3034	0	0	0	3320	0	0	0
10:96540324	C/T	CYP2C19	stop_gained	NM_000769.2:c.550C>T	NP_000760.1:p.Gln184Ter	2 of 6 Predicted as Damaging	2.284	1	2.0381	35											rs961342096	1	PASS	143188	6.98383e-06	1	0	0	0	900	0	0	0	2152	0	0	1	42032	2.37914e-05	0	0	3040	0	0	0	3324	0	0	0
10:96540418	T/C	CYP2C19	splice_donor_variant	NM_000769.2:c.642+2T>C		2 of 6 Predicted as Damaging	4.529	1	11.3412	24	0.946527	0.6									rs1402465790	1	PASS	143200	6.98324e-06	1	0	0	0	900	0	0	0	2152	0	0	0	42042	0	0	0	3040	0	0	0	3318	0	0	0
10:96541576	A/G	CYP2C19	splice_acceptor_variant	NM_000769.2:c.643-2A>G		2 of 6 Predicted as Damaging	5.307	0.994	11.1968	23.7	0.999989	0.932										1	PASS	143202	6.98314e-06	1	0	0	0	900	0	0	0	2150	0	0	0	42050	0	0	0	3042	0	0	0	3322	0	0	0
10:96541689	C/T	CYP2C19	stop_gained	NM_000769.2:c.754C>T	NP_000760.1:p.Gln252Ter	1 of 6 Predicted as Damaging	-0.554		11.748	35											rs748628122	1	PASS	142928	2.09896e-05	3	0	0	0	898	0	0	0	2146	0	0	1	41960	2.38322e-05	0	0	3014	0	0	0	3320	0	0	0
10:96541743	A/T	CYP2C19	stop_gained	NM_000769.2:c.808A>T	NP_000760.1:p.Lys270Ter	2 of 6 Predicted as Damaging	0.787	0.971	7.514	36											rs1450262550	1	PASS	143256	6.98051e-06	1	0	0	0	900	0	0	0	2154	0	0	0	42054	0	0	0	3044	0	0	0	3320	0	0	0
10:96541755	G/T	CYP2C19	splice_donor_variant	NM_000769.2:c.819+1G>T		2 of 6 Predicted as Damaging	5.702	1	13.7436	26.1	0.999964	0.912									rs894663229	1	PASS	143158	1.39706e-05	2	0	0	0	898	0	0	0	2152	0	0	1	42036	2.37891e-05	0	0	3042	0	0	0	3320	0	0	0
10:96580252	G/A	CYP2C19	splice_acceptor_variant	NM_000769.2:c.820-1G>A		2 of 6 Predicted as Damaging	5.18	1	11.4092	24.8	0.999982	0.936									rs59705169	1	PASS	143202	6.98314e-06	1	0	0	0	898	0	0	0	2150	0	0	0	42014	0	0	1	3040	0.000328947	0	0	3322	0	0	0
10:96580252	G/C	CYP2C19	splice_acceptor_variant	NM_000769.2:c.820-1G>C		2 of 6 Predicted as Damaging	5.18	1	11.4092	24.6	0.999982	0.938									rs59705169	1	PASS	143202	4.18989e-05	6	0	0	0	898	0	0	0	2150	0	0	6	42014	0.00014281	0	0	3040	0	0	0	3322	0	0	0
10:96580286	G/T	CYP2C19	stop_gained	NM_000769.2:c.853G>T	NP_000760.1:p.Glu285Ter	1 of 6 Predicted as Damaging	1.935	0.056	7.6652	36											rs141533135	1	PASS	143274	6.97963e-06	1	0	0	0	900	0	0	0	2150	0	0	0	42044	0	0	0	3042	0	0	0	3322	0	0	0
10:96580395	G/A	CYP2C19	splice_donor_variant	NM_000769.2:c.961+1G>A		2 of 6 Predicted as Damaging	5.18	1	11.4092	26.2	0.999978	0.936									rs200506574	1	PASS	143298	6.28062e-05	9	0	0	0	900	0	0	0	2144	0	0	0	42056	0	0	0	3044	0	0	0	3320	0	0	0
10:96602692	G/C	CYP2C19	missense_variant	NM_000769.2:c.1060G>C	NP_000760.1:p.Glu354Gln	6 of 6 Predicted as Damaging	9.027	1	12.64	23.5											rs747508319	1	PASS	143308	6.97798e-06	1	0	0	0	900	0	0	1	2150	0.000465116	0	0	42052	0	0	0	3046	0	0	0	3322	0	0	0
10:96602692	G/A	CYP2C19	missense_variant	NM_000769.2:c.1060G>A	NP_000760.1:p.Glu354Lys	6 of 6 Predicted as Damaging	9.027	1	12.64	24.2											rs747508319	1	PASS	143308	4.18679e-05	6	0	0	0	900	0	0	0	2150	0	0	4	42052	9.51203e-05	0	0	3046	0	0	0	3322	0	0	0
10:96602698	C/T	CYP2C19	stop_gained	NM_000769.2:c.1066C>T	NP_000760.1:p.Gln356Ter	2 of 6 Predicted as Damaging	7.172	1	12.64	38												1	PASS	143310	6.97788e-06	1	0	0	0	900	0	0	0	2152	0	0	1	42036	2.37891e-05	0	0	3050	0	0	0	3320	0	0	0
10:96602769	C/A	CYP2C19	stop_gained	NM_000769.2:c.1137C>A	NP_000760.1:p.Tyr379Ter	1 of 6 Predicted as Damaging	-0.371		4.9625	35											rs771120274	1	PASS	143320	2.79096e-05	4	0	0	0	900	0	0	0	2154	0	0	1	42032	2.37914e-05	0	0	3048	0	0	0	3320	0	0	0
10:96609815	G/C	CYP2C19	missense_variant	NM_000769.2:c.1291G>C	NP_000760.1:p.Gly431Arg	6 of 6 Predicted as Damaging	8.268	1	9.0009	26.2	0.999987	0.958									rs748034170	1	PASS	143182	1.39682e-05	2	0	0	0	900	0	0	0	2150	0	0	2	42004	4.76145e-05	0	0	3034	0	0	0	3318	0	0	0
10:96612489	G/C	CYP2C19	splice_acceptor_variant	NM_000769.2:c.1292-1G>C		2 of 6 Predicted as Damaging	8.387	1	12.2839	25	0.999983	0.9									rs746548445	1	PASS	143264	6.98012e-06	1	0	0	0	900	0	0	0	2152	0	0	0	42038	0	0	0	3044	0	0	0	3322	0	0	0
10:96612507	G/T	CYP2C19	stop_gained	NM_000769.2:c.1309G>T	NP_000760.1:p.Gly437Ter	2 of 6 Predicted as Damaging	8.433	1	12.2839	40											rs1437042029	1	PASS	143262	6.98022e-06	1	0	0	0	900	0	0	0	2152	0	0	1	42006	2.38061e-05	0	0	3042	0	0	0	3324	0	0	0
10:96612520	C/T	CYP2C19	missense_variant	NM_000769.2:c.1322C>T	NP_000760.1:p.Ala441Val	6 of 6 Predicted as Damaging	6.689	1	12.2839	25.7											rs1478149305	1	PASS	143278	6.97944e-06	1	0	0	0	900	0	0	0	2150	0	0	0	42040	0	0	0	3046	0	0	0	3322	0	0	0
10:96701614	G/C	CYP2C9	splice_acceptor_variant	NM_000771.3:c.169-1G>C		2 of 6 Predicted as Damaging	7.785	1	12.981	23.4	0.999972	0.816									rs1272084617	1	PASS	143284	1.39583e-05	2	0	0	0	900	0	0	0	2152	0	0	0	42046	0	0	0	3048	0	0	0	3322	0	0	0
10:96702056	G/T	CYP2C9	stop_gained	NM_000771.3:c.439G>T	NP_000762.2:p.Glu147Ter	2 of 6 Predicted as Damaging	5.172	1	12.9354	41												1	PASS	143288	6.97895e-06	1	0	0	0	900	0	0	0	2150	0	0	0	42054	0	0	0	3050	0	0	0	3324	0	0	0
10:96707598	TTTTTCCATAAACGTTT/-	CYP2C9	stop_gained	NM_000771.3:c.544_560del	NP_000762.2:p.Ile182Terfs					37												1	PASS	143186	6.98392e-06	1	0	0	0	900	0	0	0	2148	0	0	0	42026	0	0	0	3044	0	0	0	3322	0	0	0
10:96707616	G/-	CYP2C9	frameshift_variant	NM_000771.3:c.562delG	NP_000762.2:p.Asp188Ilefs*10					28.5											rs758778922	1	PASS	143284	6.97915e-06	1	0	0	0	900	0	0	0	2154	0	0	0	42046	0	0	0	3046	0	0	0	3320	0	0	0
10:96709038	A/-	CYP2C9	frameshift_variant	NM_000771.3:c.816delA	NP_000762.2:p.Lys273Argfs*34					12.75												1	PASS	143222	0.00334446	479	3	0	0	900	0	0	3	2152	0.00139405	0	457	42042	0.0108701	3	0	3036	0	0	0	3324	0	0	0
10:96731933	G/A	CYP2C9	missense_variant	NM_000771.3:c.892G>A	NP_000762.2:p.Gly298Arg	6 of 6 Predicted as Damaging	8.077	1	11.6786	24.9											rs1161147302	1	PASS	143234	6.98158e-06	1	0	0	0	900	0	0	0	2150	0	0	0	42024	0	0	0	3044	0	0	0	3322	0	0	0
10:96731943	C/T	CYP2C9	missense_variant	NM_000771.3:c.902C>T	NP_000762.2:p.Thr301Met	6 of 6 Predicted as Damaging	4.731	0.999	11.6787	25											rs757970831	1	PASS	143208	2.09486e-05	3	0	0	0	900	0	0	0	2154	0	0	0	42016	0	0	0	3048	0	0	0	3322	0	0	0
10:96740942	-/A	CYP2C9	frameshift_variant	NM_000771.3:c.966dupA	NP_000762.2:p.Val323Serfs*6					27.7											rs767003960	1	PASS	143248	6.9809e-06	1	0	0	0	898	0	0	0	2152	0	0	1	42030	2.37925e-05	0	0	3042	0	0	0	3320	0	0	0
10:96740948	C/T	CYP2C9	stop_gained	NM_000771.3:c.970C>T	NP_000762.2:p.Gln324Ter	2 of 6 Predicted as Damaging	3.127	0.994	13.0432	40											rs1454934321	1	PASS	143104	1.39758e-05	2	0	0.000125913	0	898	0	0	0	2148	0	0	0	41966	0	0	0	3028	0	0	0	3320	0	0	1
10:96740996	C/T	CYP2C9	stop_gained	NM_000771.3:c.1018C>T	NP_000762.2:p.Gln340Ter	2 of 6 Predicted as Damaging	1.488	1	6.1384	37											rs767109263	1	PASS	143216	6.98246e-06	1	0	0	0	898	0	0	0	2148	0	0	0	42006	0	0	0	3044	0	0	0	3322	0	0	0
10:96741038	G/T	CYP2C9	stop_gained	NM_000771.3:c.1060G>T	NP_000762.2:p.Glu354Ter	2 of 6 Predicted as Damaging	6.658	1	9.3127	38											rs749060448	1	PASS	143224	6.98207e-06	1	0	0	0	900	0	0	0	2148	0	0	0	42028	0	0	0	3044	0	0	0	3324	0	0	0
10:96741047	A/G	CYP2C9	missense_variant	NM_000771.3:c.1069A>G	NP_000762.2:p.Arg357Gly	6 of 6 Predicted as Damaging	1.187	1	7.7859	23.8											rs1245952274	1	PASS	143294	6.97866e-06	1	0	0	0	900	0	0	0	2154	0	0	0	42048	0	0	0	3044	0	0	0	3324	0	0	0
10:96741128	G/T	CYP2C9	splice_donor_variant	NM_000771.3:c.1149+1G>T		2 of 6 Predicted as Damaging	6.62	1	8.4626	22.4	0.999967	0.88									rs542577750	1	PASS	143210	6.98275e-06	1	0	0	0	900	0	0	0	2152	0	0	0	42036	0	0	0	3042	0	0	0	3324	0	0	0
10:96741128	G/A	CYP2C9	splice_donor_variant	NM_000771.3:c.1149+1G>A		2 of 6 Predicted as Damaging	6.62	1	8.4626	22.5	0.999958	0.882									rs542577750	1	PASS	143210	2.09483e-05	3	0	0	0	900	0	0	0	2152	0	0	0	42036	0	0	1	3042	0.000328731	0	0	3324	0	0	0
10:96745860	T/C	CYP2C9	missense_variant	NM_000771.3:c.1220T>C	NP_000762.2:p.Phe407Ser	6 of 6 Predicted as Damaging	5.148	1	10.3869	25											rs1254166721	1	PASS	143292	6.97876e-06	1	0	0	0	900	0	0	0	2152	0	0	1	42052	2.37801e-05	0	0	3044	0	0	0	3320	0	0	0
10:96745922	T/C	CYP2C9	missense_variant	NM_000771.3:c.1282T>C	NP_000762.2:p.Phe428Leu	6 of 6 Predicted as Damaging	6.759	1	10.3869	25.8											rs1269403966	1	PASS	143296	6.97856e-06	1	0	0	0	900	0	0	0	2154	0	0	0	42050	0	0	0	3050	0	0	0	3324	0	0	0
10:96745923	T/C	CYP2C9	missense_variant	NM_000771.3:c.1283T>C	NP_000762.2:p.Phe428Ser	6 of 6 Predicted as Damaging	6.759	1	10.3869	26.2											rs765301608	1	PASS	143290	6.97885e-06	1	0	0	0	900	0	0	0	2154	0	0	0	42050	0	0	0	3044	0	0	0	3324	0	0	0
10:96745932	G/T	CYP2C9	splice_donor_variant	NM_000771.3:c.1291+1G>T		2 of 6 Predicted as Damaging	6.544	1	10.2329	23.8	0.999895	0.804									rs750312180	1	PASS	143180	2.09526e-05	3	0	0	0	900	0	0	0	2152	0	0	0	42006	0	0	0	3040	0	0	0	3324	0	0	0
10:96748610	G/A	CYP2C9	missense_variant	NM_000771.3:c.1298G>A	NP_000762.2:p.Arg433Gln	6 of 6 Predicted as Damaging	8.022	1	12.6943	25.6											rs867464190	1	PASS	143240	2.09439e-05	3	0	0	0	900	0	0	0	2150	0	0	2	42024	4.75919e-05	0	0	3044	0	0	0	3318	0	0	0
10:96748633	G/A	CYP2C9	missense_variant	NM_000771.3:c.1321G>A	NP_000762.2:p.Ala441Thr	6 of 6 Predicted as Damaging	5.147	1	12.6943	24.1												1	PASS	143264	6.98012e-06	1	0	0	0	900	0	0	0	2152	0	0	1	42024	2.37959e-05	0	0	3040	0	0	0	3322	0	0	0
10:96748634	C/T	CYP2C9	missense_variant	NM_000771.3:c.1322C>T	NP_000762.2:p.Ala441Val	6 of 6 Predicted as Damaging	6.364	1	12.6943	24											rs565889722	1	PASS	143262	1.39604e-05	2	0	0	0	900	0	0	0	2150	0	0	0	42018	0	0	0	3040	0	0	0	3320	0	0	1
10:96748645	GT/-	CYP2C9	frameshift_variant	NM_000771.3:c.1333_1334delGT	NP_000762.2:p.Leu445Valfs*12					24.2												1	PASS	143256	1.3961e-05	2	0	0	0	900	0	0	0	2152	0	0	2	42034	4.75805e-05	0	0	3044	0	0	0	3320	0	0	0
22:42522580	C/G	CYP2D6	missense_variant	NM_000106.5:c.1490G>C	NP_000097.3:p.Arg497Pro	6 of 6 Predicted as Damaging	3.947	1	8.3687	24											rs1440526469	1	PASS	142342	1.40507e-05	2	0	0	0	896	0	0	0	2136	0	0	0	41472	0	0	0	3002	0	0	0	3318	0	0	0
22:42522627	-/AAAG	CYP2D6	frameshift_variant	NM_000106.5:c.1440_1443dupCTTT	NP_000097.3:p.Ala482Leufs*11					11.65												1	PASS	141968	1.40877e-05	2	0	0	0	898	0	0	0	2134	0	0	2	41216	4.85248e-05	0	0	2986	0	0	0	3320	0	0	0
22:42523547	-/GGGCAGTG	CYP2D6	frameshift_variant	NM_000106.5:c.1075_1076insCACTGCCC	NP_000097.3:p.Val359Alafs*4					25.4												1	PASS	142838	7.00094e-06	1	0	0	0	900	0	0	0	2148	0	0	0	41800	0	0	0	3026	0	0	0	3324	0	0	0
22:42523549	G/A	CYP2D6	missense_variant	NM_000106.5:c.1073C>T	NP_000097.3:p.Ala358Val	6 of 6 Predicted as Damaging	9.567	1	17.7329	25.2											rs367922258	1	PASS	142840	3.50042e-05	5	0	0	0	900	0	0	1	2146	0.000465983	0	1	41798	2.39246e-05	0	0	3024	0	0	0	3320	0	0	0
22:42523603	C/T	CYP2D6	missense_variant	NM_000106.5:c.1019G>A	NP_000097.3:p.Gly340Glu	6 of 6 Predicted as Damaging	7.561	1	17.7329	28.4											rs1041305578	1	PASS	142760	7.00476e-06	1	0	0	0	896	0	0	0	2140	0	0	1	41750	2.39521e-05	0	0	3030	0	0	0	3324	0	0	0
22:42523608	-/C	CYP2D6	frameshift_variant	NM_000106.5:c.1014dupG	NP_000097.3:p.Ile339Aspfs*11					23.1												1	PASS	142702	7.00761e-06	1	0	0	0	896	0	0	0	2144	0	0	0	41726	0	0	0	3028	0	0	0	3324	0	0	0
22:42523620	C/A	CYP2D6	missense_variant	NM_000106.5:c.1002G>T	NP_000097.3:p.Glu334Asp	6 of 6 Predicted as Damaging	1.212	1	8.9995	24.9												1	PASS	142690	7.0082e-06	1	0	0	0	896	0	0	0	2140	0	0	0	41712	0	0	1	3028	0.000330251	0	0	3322	0	0	0
22:42523637	C/T	CYP2D6	splice_acceptor_variant	NM_000106.5:c.986-1G>A		2 of 6 Predicted as Damaging	5.414	1	17.7329	34	0.999987	0.942										1	PASS	142582	7.01351e-06	1	0	0	0	896	0	0	0	2138	0	0	1	41638	2.40165e-05	0	0	3024	0	0	0	3322	0	0	0
22:42523847	GCTAGAGGGAAGCACAGGA/-	CYP2D6	frameshift_variant	NM_000106.5:c.964_982del	NP_000097.3:p.Ile322Serfs*11					52												1	PASS	142310	7.02691e-06	1	0	0	0	898	0	0	0	2142	0	0	0	41480	0	0	0	3014	0	0	0	3324	0	0	0
22:42523915	G/A	CYP2D6	missense_variant	NM_000106.5:c.914C>T	NP_000097.3:p.Ala305Val	6 of 6 Predicted as Damaging	3.333	1	9.036	22.3											rs967434863	1	PASS	142454	7.01981e-06	1	0	0	0	896	0	0	0	2140	0	0	1	41544	2.40709e-05	0	0	3026	0	0	0	3322	0	0	0
22:42523916	C/T	CYP2D6	missense_variant	NM_000106.5:c.913G>A	NP_000097.3:p.Ala305Thr	6 of 6 Predicted as Damaging	3.913	1	12.0585	23.1												1	PASS	142532	7.01597e-06	1	0	0	0	898	0	0	0	2142	0	0	0	41584	0	0	0	3028	0	0	0	3324	0	0	0
22:42524289	G/A	CYP2D6	stop_gained	NM_000106.5:c.730C>T	NP_000097.3:p.Gln244Ter	2 of 6 Predicted as Damaging	4.657	0.998	6.4406	36												1	PASS	142022	2.11235e-05	3	0	0	0	894	0	0	0	2132	0	0	1	41292	2.42178e-05	0	0	2990	0	0	0	3320	0	0	0
22:42525145	C/G	CYP2D6	missense_variant	NM_000106.5:c.395G>C	NP_000097.3:p.Arg132Thr	6 of 6 Predicted as Damaging	5.139	0.994	8.9735	23.2											rs752758046	1	PASS	142740	7.00574e-06	1	0	0	0	896	0	0	0	2146	0	0	0	41688	0	0	0	3036	0	0	0	3324	0	0	0
22:42525145	C/T	CYP2D6	missense_variant	NM_000106.5:c.395G>A	NP_000097.3:p.Arg132Lys	6 of 6 Predicted as Damaging	5.139	0.994	8.9735	23.1											rs752758046	1	PASS	142740	7.00574e-06	1	0	0	0	896	0	0	0	2146	0	0	0	41688	0	0	0	3036	0	0	0	3324	0	0	0
22:42525145	C/A	CYP2D6	missense_variant	NM_000106.5:c.395G>T	NP_000097.3:p.Arg132Met	6 of 6 Predicted as Damaging	5.139	0.994	8.9735	23.6											rs752758046	1	PASS	142740	2.10172e-05	3	0	0	0	896	0	0	0	2146	0	0	0	41688	0	0	0	3036	0	0	0	3324	0	0	0
22:42525158	A/G	CYP2D6	missense_variant	NM_000106.5:c.382T>C	NP_000097.3:p.Trp128Arg	6 of 6 Predicted as Damaging	4.986	1	8.4969	23.1											rs376636053	1	PASS	142646	6.30933e-05	9	1	0	0	896	0	0	0	2148	0	0	7	41652	0.000168059	1	0	3036	0	0	0	3324	0	0	0
22:42525167	C/T	CYP2D6	missense_variant	NM_000106.5:c.373G>A	NP_000097.3:p.Gly125Arg	6 of 6 Predicted as Damaging	2.648	0.461	6.3448	21.1											rs1464085609	1	PASS	142754	7.00506e-06	1	0	0	0	896	0	0	0	2150	0	0	1	41702	2.39797e-05	0	0	3034	0	0	0	3324	0	0	0
22:42525168	A/C	CYP2D6	stop_gained	NM_000106.5:c.372T>G	NP_000097.3:p.Tyr124Ter	1 of 6 Predicted as Damaging	-2.488		9.0158	35											rs766391487	1	PASS	142664	7.00948e-06	1	0	0	0	894	0	0	0	2150	0	0	0	41668	0	0	0	3030	0	0	0	3318	0	0	0
22:42525188	-/GTGGGGGTGGGACGGGCAC	CYP2D6	frameshift_variant	NM_000106.5:c.353-1_353ins(19)	NP_000097.3:p.Val119Alafs*141					25.1												1	PASS	142728	7.00633e-06	1	0	0	0	896	0	0	0	2148	0	0	0	41724	0	0	1	3030	0.000330033	0	0	3322	0	0	0
22:42525738	G/A	CYP2D6	splice_donor_variant	NM_000106.5:c.352+2C>T		1 of 6 Predicted as Damaging	0.37	0.991	6.5604	17.31											rs1330523501	1	PASS	142578	7.0137e-06	1	0	0	0	894	0	0	0	2138	0	0	1	41616	2.40292e-05	0	0	3016	0	0	0	3324	0	0	0
22:42525738	G/T	CYP2D6	splice_donor_variant	NM_000106.5:c.352+2C>A		2 of 6 Predicted as Damaging	0.37	0.991	6.5604	16.98											rs1330523501	1	PASS	142578	7.0137e-06	1	0	0	0	894	0	0	0	2138	0	0	1	41616	2.40292e-05	0	0	3016	0	0	0	3324	0	0	0
22:42525743	G/A	CYP2D6	stop_gained	NM_000106.5:c.349C>T	NP_000097.3:p.Gln117Ter	1 of 6 Predicted as Damaging	-0.272	0.009	11.8463	35											rs905048715	1	PASS	142578	7.0137e-06	1	0	0	0	894	0	0	0	2142	0	0	1	41614	2.40304e-05	0	0	3020	0	0	0	3320	0	0	0
22:42526682	GG/-	CYP2D6	frameshift_variant	NM_000106.5:c.111_112delCC	NP_000097.3:p.Leu38Alafs*215					15.99											rs1287287392	1	PASS	141998	7.04235e-06	1	0	0	0	898	0	0	0	2132	0	0	0	41260	0	0	0	2990	0	0	0	3324	0	0	0
7:99245942	G/-	CYP3A5	stop_gained	NM_000777.4:c.1495delC	NP_000768.1:p.Leu499Terfs					14.91											rs1333924124	1	PASS	143332	6.97681e-06	1	0	0	0	900	0	0	0	2154	0	0	0	42060	0	0	0	3050	0	0	0	3324	0	0	0
7:99246024	C/T	CYP3A5	splice_acceptor_variant	NM_000777.4:c.1414-1G>A		2 of 6 Predicted as Damaging	6.018	1	12.298	25.6	0.999987	0.948									rs1441700361	1	PASS	142960	6.99496e-06	1	0	0	0	900	0	0	0	2142	0	0	0	41918	0	0	0	3038	0	0	0	3322	0	0	0
7:99247731	G/A	CYP3A5	stop_gained	NM_000777.4:c.1378C>T	NP_000768.1:p.Gln460Ter	2 of 6 Predicted as Damaging	7.271	1	15.1921	38											rs149664815	1	PASS	143316	0.000216305	31	0	0	0	898	0	0	0	2150	0	0	30	42056	0.000713335	0	0	3050	0	0	0	3324	0	0	0
7:99247736	T/-	CYP3A5	frameshift_variant	NM_000777.4:c.1373delA	NP_000768.1:p.Val458Alafs*17					23.1												1	PASS	143332	0.0012628	181	0	0	0	900	0	0	1	2154	0.000464253	0	19	42064	0.000451693	0	0	3050	0	0	0	3320	0	0	0
7:99247769	G/A	CYP3A5	missense_variant	NM_000777.4:c.1340C>T	NP_000768.1:p.Ala447Val	6 of 6 Predicted as Damaging	5.206	1	12.5724	24.4											rs147472467	1	PASS	143316	1.39552e-05	2	0	0	0	900	0	0	0	2154	0	0	0	42050	0	0	0	3044	0	0	0	3322	0	0	0
7:99247782	C/T	CYP3A5	missense_variant	NM_000777.4:c.1327G>A	NP_000768.1:p.Gly443Ser	6 of 6 Predicted as Damaging	5.641	1	15.1921	28.6											rs377454308	1	PASS	143248	6.9809e-06	1	0	0	0	900	0	0	0	2150	0	0	0	42022	0	0	0	3040	0	0	0	3322	0	0	0
7:99247855	C/A	CYP3A5	missense_variant	NM_000777.4:c.1254G>T	NP_000768.1:p.Arg418Ser	6 of 6 Predicted as Damaging	0.3	0.989	7.4366	28.8	0.995088	0.852										1	PASS	143200	6.98324e-06	1	0	0	0	900	0	0	0	2150	0	0	1	42004	2.38073e-05	0	0	3036	0	0	0	3322	0	0	0
7:99250176	C/A	CYP3A5	missense_variant	NM_000777.4:c.1253G>T	NP_000768.1:p.Arg418Met	6 of 6 Predicted as Damaging	7.311	1	15.492	34	0.99999	0.972									rs370299887	1	PASS	143228	1.39638e-05	2	0	0	0	898	0	0	0	2150	0	0	2	42012	4.76054e-05	0	0	3048	0	0	0	3320	0	0	0
7:99250198	G/A	CYP3A5	missense_variant	NM_000777.4:c.1231C>T	NP_000768.1:p.Pro411Ser	6 of 6 Predicted as Damaging	5.16	1	11.0262	25.2											rs756677833	1	PASS	143228	6.98188e-06	1	0	0	0	900	0	0	0	2154	0	0	0	41984	0	0	0	3046	0	0	0	3322	0	0	0
7:99250335	C/A	CYP3A5	missense_variant	NM_000777.4:c.1094G>T	NP_000768.1:p.Arg365Ile	6 of 6 Predicted as Damaging	7.311	0.988	15.492	26.3												1	PASS	143270	6.97983e-06	1	0	0	0	900	0	0	0	2150	0	0	0	42022	0	0	0	3046	0	0	0	3322	0	0	0
7:99250341	G/-	CYP3A5	frameshift_variant	NM_000777.4:c.1088delC	NP_000768.1:p.Thr363Asnfs*33					27.9											rs755871374	1	PASS	143210	2.09483e-05	3	0	0	0	900	0	0	0	2148	0	0	0	42002	0	0	0	3046	0	0	0	3322	0	0	0
7:99250370	TTTTGTATTTTTAGTAGAGACAGGG/-	CYP3A5	frameshift_variant	NM_000777.4:c.1035_1059del	NP_000768.1:p.Thr346Serfs*7					35												1	PASS	143182	6.98412e-06	1	0	0	0	898	0	0	0	2152	0	0	0	41918	0	0	0	3052	0	0	0	3322	0	0	0
7:99258222	T/-	CYP3A5	frameshift_variant	NM_000777.4:c.926delA	NP_000768.1:p.Thr310Profs*51					24												1	PASS	143210	6.98275e-06	1	0	0	0	900	0	0	0	2144	0	0	0	42008	0	0	0	3044	0	0	0	3322	0	0	0
7:99258222	G/T	CYP3A5	missense_variant	NM_000777.4:c.926C>A	NP_000768.1:p.Thr309Asn	6 of 6 Predicted as Damaging	9.304	1	14.7079	23.7											rs766695006	1	PASS	143210	2.09483e-05	3	0	0	0	900	0	0	0	2144	0	0	1	42008	2.3805e-05	0	0	3044	0	0	0	3322	0	0	0
7:99260502	G/A	CYP3A5	stop_gained	NM_000777.4:c.802C>T	NP_000768.1:p.Arg268Ter	1 of 6 Predicted as Damaging	1.528	0.054	10.0863	35											rs148176345	1	PASS	143180	0.000104763	15	0	0	1	900	0.00111111	0	2	2146	0.000931966	0	6	41986	0.000142905	0	0	3048	0	0	0	3324	0	0	0
7:99261643	A/T	CYP3A5	stop_gained	NM_000777.4:c.746T>A	NP_000768.1:p.Leu249Ter	2 of 6 Predicted as Damaging	6.921	1	11.9716	35											rs201260783	1	PASS	143334	0.000188371	27	0	0	0	900	0	0	0	2152	0	0	4	42052	9.51203e-05	0	2	3050	0.000655738	0	0	3322	0	0	0
7:99261696	TG/-	CYP3A5	frameshift_variant	NM_000777.4:c.692_693delCA	NP_000768.1:p.Pro231Argfs*3					23.8											rs772471367	1	PASS	143206	6.98295e-06	1	0	0.000125945	0	898	0	0	0	2146	0	0	0	42008	0	0	0	3050	0	0	0	3320	0	0	1
7:99262870	AG/-	CYP3A5	frameshift_variant	NM_000777.4:c.588_589delCT	NP_000768.1:p.Asn197Glnfs*11					23.1												1	PASS	143326	1.39542e-05	2	0	0	0	900	0	0	0	2152	0	0	2	42062	4.75489e-05	0	0	3048	0	0	0	3322	0	0	0
7:99264235	-/A	CYP3A5	frameshift_variant	NM_000777.4:c.510_511insT	NP_000768.1:p.Thr171Tyrfs*38					21.8											rs765303708	1	PASS	143294	3.48933e-05	5	0	0	0	900	0	0	0	2154	0	0	5	42024	0.00011898	0	0	3048	0	0	0	3322	0	0	0
7:99264249	T/A	CYP3A5	stop_gained	NM_000777.4:c.496A>T	NP_000768.1:p.Lys166Ter	1 of 6 Predicted as Damaging	1.32	0.04	7.0057	35											rs1209004470	1	PASS	143286	6.97905e-06	1	0	0	0	898	0	0	0	2154	0	0	0	42038	0	0	0	3038	0	0	0	3318	0	0	0
7:99264252	T/-	CYP3A5	frameshift_variant	NM_000777.4:c.493delA	NP_000768.1:p.Glu165Argfs*8					35												1	PASS	143328	4.1862e-05	6	0	0	0	900	0	0	0	2154	0	0	4	42054	9.51158e-05	0	0	3042	0	0	0	3320	0	0	0
7:99264258	GA/-	CYP3A5	frameshift_variant	NM_000777.4:c.486_487delTC	NP_000768.1:p.Glu163Serfs*45					33												1	PASS	143274	6.97963e-06	1	0	0	0	900	0	0	0	2152	0	0	1	42038	2.3788e-05	0	0	3044	0	0	0	3322	0	0	0
7:99264289	A/C	CYP3A5	stop_gained	NM_000777.4:c.456T>G	NP_000768.1:p.Tyr152Ter	2 of 6 Predicted as Damaging	2.142	0.997	7.5226	35											rs561555514	1	PASS	143278	1.39589e-05	2	0	0	0	900	0	0	0	2148	0	0	0	42024	0	0	1	3046	0.000328299	0	0	3322	0	0	0
7:99264313	C/G	CYP3A5	splice_acceptor_variant	NM_000777.4:c.433-1G>C		2 of 6 Predicted as Damaging	6.607	1	13.3785	29.6	0.999987	0.938									rs373134805	1	PASS	143298	5.58277e-05	8	0	0	0	900	0	0	0	2152	0	0	0	42038	0	0	4	3046	0.0013132	0	0	3320	0	0	0
7:99264574	C/A	CYP3A5	splice_donor_variant	NM_000777.4:c.432+1G>T		2 of 6 Predicted as Damaging	7.211	1	13.3785	29.5	0.999987	0.938									rs759812876	1	PASS	143254	6.98061e-06	1	0	0	0	900	0	0	0	2152	0	0	0	42020	0	0	0	3042	0	0	0	3324	0	0	0
7:99264599	G/-	CYP3A5	frameshift_variant	NM_000777.4:c.408delC	NP_000768.1:p.Phe137Serfs*21					24.3											rs767317522	1	PASS	143240	2.09439e-05	3	0	0	0	900	0	0	0	2150	0	0	0	42004	0	0	1	3042	0.000328731	0	0	3324	0	0	0
7:99264618	C/T	CYP3A5	missense_variant	NM_000777.4:c.389G>A	NP_000768.1:p.Arg130Gln	6 of 6 Predicted as Damaging	7.211	1	13.3785	25.2											rs758037875	1	PASS	143216	2.09474e-05	3	0	0	0	900	0	0	0	2150	0	0	0	42016	0	0	1	3032	0.000329815	0	0	3324	0	0	0
7:99264690	T/C	CYP3A5	splice_acceptor_variant	NM_000777.4:c.319-2A>G		1 of 6 Predicted as Damaging	1.631	0.734	7.2904	21.8	0.999839	0.81									rs1431404870	1	PASS	143310	6.97788e-06	1	0	0	0	900	0	0	0	2152	0	0	1	42050	2.37812e-05	0	0	3048	0	0	0	3316	0	0	0
7:99269425	G/C	CYP3A5	stop_gained	NM_000777.4:c.318+778C>G		0 of 6 Predicted as Damaging	-0.411			1.847											rs559561358	1	PASS	143272	3.48987e-05	5	0	0	0	900	0	0	1	2154	0.000464253	0	0	42012	0	0	4	3048	0.00131234	0	0	3322	0	0	0
7:99269465	G/-	CYP3A5	frameshift_variant	NM_000777.4:c.318+738delC						0.124											rs1487538886	1	PASS	143290	1.39577e-05	2	0	0	0	900	0	0	0	2154	0	0	2	42030	4.75851e-05	0	0	3044	0	0	0	3324	0	0	0
7:99269471	G/A	CYP3A5	stop_gained	NM_000777.4:c.318+732C>T		1 of 6 Predicted as Damaging	-0.288	0.001		1.659												1	PASS	143292	6.97876e-06	1	0	0	0	900	0	0	0	2152	0	0	0	42034	0	0	0	3050	0	0	0	3324	0	0	0
7:99270232	C/A	CYP3A5	stop_gained	NM_000777.4:c.289G>T	NP_000768.1:p.Glu97Ter	2 of 6 Predicted as Damaging	4.713	1	12.5544	36											rs763263522	1	PASS	143200	6.98324e-06	1	0	0	0	900	0	0	0	2148	0	0	1	41992	2.38141e-05	0	0	3034	0	0	0	3322	0	0	0
7:99270274	-/C	CYP3A5	frameshift_variant	NM_000777.4:c.247dupG	NP_000768.1:p.Ala83Glyfs*40					15.89					DM?	"Breast_cancer"					rs753330469	1	PASS	143214	0.000125686	18	0	0	0	900	0	0	0	2146	0	0	1	42004	2.38073e-05	0	0	3042	0	0	1	3324	0.000300842	0	0
7:99270289	G/A	CYP3A5	stop_gained	NM_000777.4:c.232C>T	NP_000768.1:p.Gln78Ter	1 of 6 Predicted as Damaging	-0.472		12.0731	35												1	PASS	143260	6.98032e-06	1	0	0	0	900	0	0	0	2154	0	0	0	42030	0	0	0	3034	0	0	0	3322	0	0	0
7:99270303	C/G	CYP3A5	splice_acceptor_variant	NM_000777.4:c.219-1G>C		2 of 6 Predicted as Damaging	5.746	1	11.5882	22.7	0.999985	0.916									rs1220943116	1	PASS	143262	6.98022e-06	1	0	0	0	900	0	0	0	2152	0	0	0	42026	0	0	0	3040	0	0	0	3324	0	0	0
7:99270405	A/T	CYP3A5	splice_donor_variant	NM_000777.4:c.219-103T>A						0.67	4.47039e-05	0.002									rs1448779028	1	PASS	143196	6.98344e-06	1	0	0	0	900	0	0	0	2154	0	0	0	41998	0	0	0	3042	0	0	0	3324	0	0	0
7:99272157	C/A	CYP3A5	stop_gained	NM_000777.4:c.217G>T	NP_000768.1:p.Gly73Ter	2 of 6 Predicted as Damaging	3.568	1	8.6272	27.1	7.26006e-05	0.108									rs781230602	1	PASS	143248	1.39618e-05	2	0	0	0	900	0	0	0	2152	0	0	0	42012	0	0	0	3038	0	0	1	3318	0.000301386	0	0
7:99272158	C/T	CYP3A5	stop_gained	NM_000777.4:c.216G>A	NP_000768.1:p.Trp72Ter	2 of 6 Predicted as Damaging	6.26	1	12.7937	35	0.00196671	0.046									rs895150745	1	PASS	143268	4.18796e-05	6	0	0	0	900	0	0	0	2150	0	0	6	42028	0.000142762	0	0	3048	0	0	0	3322	0	0	0
7:99272159	C/T	CYP3A5	stop_gained	NM_000777.4:c.215G>A	NP_000768.1:p.Trp72Ter	2 of 6 Predicted as Damaging	6.26	1	12.7937	35											rs1172946988	1	PASS	143318	2.09325e-05	3	0	0	0	900	0	0	2	2152	0.000929368	0	0	42038	0	0	0	3044	0	0	0	3324	0	0	0
7:99272170	A/T	CYP3A5	stop_gained	NM_000777.4:c.204T>A	NP_000768.1:p.Tyr68Ter	2 of 6 Predicted as Damaging	0.994	1	10.2004	35											rs1271163092	1	PASS	143232	6.98168e-06	1	0	0	0	900	0	0	0	2150	0	0	0	42004	0	0	0	3040	0	0	0	3322	0	0	0
7:99272207	C/-	CYP3A5	frameshift_variant	NM_000777.4:c.167delG	NP_000768.1:p.Gly56Valfs*34					23.7												1	PASS	143230	6.98178e-06	1	0	0	0	898	0	0	0	2154	0	0	1	41998	2.38107e-05	0	0	3040	0	0	0	3322	0	0	0
7:99273736	A/G	CYP3A5	splice_donor_variant	NM_000777.4:c.165+2T>C		2 of 6 Predicted as Damaging	6.34	1	7.1771	22.7	0.999634	0.758										1	PASS	143294	6.97866e-06	1	0	0	0	900	0	0	0	2154	0	0	0	42026	0	0	1	3044	0.000328515	0	0	3324	0	0	0
7:99273803	AA/-	CYP3A5	frameshift_variant	NM_000777.4:c.99_100delTT	NP_000768.1:p.Phe33Leufs*28					35												1	PASS	143148	1.39716e-05	2	0	0	0	900	0	0	0	2146	0	0	0	41976	0	0	0	3036	0	0	0	3324	0	0	0
7:99277498	C/-	CYP3A5	frameshift_variant	NM_000777.4:c.22delG	NP_000768.1:p.Ala8Argfs*82					16.71											rs1276300317	1	PASS	143246	6.981e-06	1	0	0.000125723	0	900	0	0	0	2148	0	0	0	42022	0	0	0	3046	0	0	0	3324	0	0	1
7:99277504	A/-	CYP3A5	frameshift_variant	NM_000777.4:c.16delT	NP_000768.1:p.Asn6Ilefs*84					10.84												1	PASS	143266	1.396e-05	2	0	0.000125439	0	900	0	0	0	2152	0	0	0	42026	0	0	0	3046	0	0	0	3324	0	0	2
1:97544569	TT/-	DPYD	frameshift_variant	NM_000110.3:c.3040_3041delAA	NP_000101.2:p.Lys1014Glufs*14					43											rs1557849648	1	PASS	143222	6.98217e-06	1	0	0	0	900	0	0	0	2150	0	0	1	42016	2.38005e-05	0	0	3046	0	0	0	3324	0	0	0
1:97544576	C/A	DPYD	stop_gained	NM_000110.3:c.3034G>T	NP_000101.2:p.Glu1012Ter	2 of 6 Predicted as Damaging	2.177	1	16.8148	45											rs761584058	1	PASS	143210	6.98275e-06	1	0	0	0	900	0	0	0	2150	0	0	0	42010	0	0	0	3048	0	0	0	3320	0	0	0
1:97544579	-/A	DPYD	frameshift_variant	NM_000110.3:c.3031dupT	NP_000101.2:p.Tyr1011Leufs*2					35			Uncertain Significance	(1 Stars) Criteria Provided, Single Submitter							rs1459699844	1	PASS	143226	1.39639e-05	2	0	0	0	900	0	0	0	2150	0	0	2	42022	4.75941e-05	0	0	3044	0	0	0	3324	0	0	0
1:97544620	G/C	DPYD	missense_variant	NM_000110.3:c.2990C>G	NP_000101.2:p.Pro997Arg	6 of 6 Predicted as Damaging	9.813	1	19.6731	31											rs1258973993	1	PASS	143220	6.98227e-06	1	0	0	0	900	0	0	0	2152	0	0	0	42024	0	0	0	3036	0	0	0	3320	0	0	0
1:97544636	TC/-	DPYD	frameshift_variant	NM_000110.3:c.2973_2974delGA	NP_000101.2:p.Cys992Serfs*20					32												1	PASS	143198	6.98334e-06	1	0	0	0	900	0	0	0	2150	0	0	0	42012	0	0	0	3040	0	0	0	3322	0	0	0
1:97544653	C/A	DPYD	missense_variant	NM_000110.3:c.2957G>T	NP_000101.2:p.Cys986Phe	6 of 6 Predicted as Damaging	7.776	1	19.6731	27.7											rs1250529397	1	PASS	143200	6.98324e-06	1	0	0	0	900	0	0	0	2152	0	0	1	41996	2.38118e-05	0	0	3042	0	0	0	3320	0	0	0
1:97544690	C/A	DPYD	missense_variant	NM_000110.3:c.2920G>T	NP_000101.2:p.Asp974Tyr	6 of 6 Predicted as Damaging	7.776	1	16.6656	26.5											rs757376267	1	PASS	143152	6.98558e-06	1	0	0	0	900	0	0	0	2152	0	0	0	41984	0	0	0	3032	0	0	0	3318	0	0	0
1:97547905	C/T	DPYD	missense_variant	NM_000110.3:c.2888G>A	NP_000101.2:p.Cys963Tyr	6 of 6 Predicted as Damaging	7.625	1	20.0954	33											rs776289153	1	PASS	143210	2.09483e-05	3	0	0	0	900	0	0	0	2150	0	0	3	42016	7.14014e-05	0	0	3050	0	0	0	3322	0	0	0
1:97547908	G/A	DPYD	missense_variant	NM_000110.3:c.2885C>T	NP_000101.2:p.Thr962Ile	6 of 6 Predicted as Damaging	9.624	1	20.0954	29.6											rs765247038	1	PASS	143140	6.98617e-06	1	0	0	0	900	0	0	0	2152	0	0	1	41988	2.38163e-05	0	0	3046	0	0	0	3324	0	0	0
1:97547923	C/A	DPYD	missense_variant	NM_000110.3:c.2870G>T	NP_000101.2:p.Gly957Val	6 of 6 Predicted as Damaging	7.625	1	20.0954	31												1	PASS	143218	6.98236e-06	1	0	0	0	898	0	0	0	2152	0	0	0	42034	0	0	0	3050	0	0	0	3322	0	0	0
1:97547929	T/G	DPYD	missense_variant	NM_000110.3:c.2864A>C	NP_000101.2:p.Asn955Thr	6 of 6 Predicted as Damaging	6.11	1	16.1779	24.6												1	PASS	143230	6.98178e-06	1	0	0	0	898	0	0	0	2150	0	0	0	42030	0	0	1	3052	0.000327654	0	0	3320	0	0	0
1:97547942	C/A	DPYD	stop_gained	NM_000110.3:c.2851G>T	NP_000101.2:p.Glu951Ter	2 of 6 Predicted as Damaging	5.84	1	20.0954	51											rs1373717016	1	PASS	143226	6.98197e-06	1	0	0	0	900	0	0	0	2150	0	0	0	42036	0	0	0	3050	0	0	0	3324	0	0	0
1:97547950	A/T	DPYD	missense_variant	NM_000110.3:c.2843T>A	NP_000101.2:p.Ile948Asn	6 of 6 Predicted as Damaging	9.108	1	16.1779	28.6											rs372307932	1	PASS	143244	1.39622e-05	2	0	0	0	900	0	0	0	2154	0	0	1	42040	2.37869e-05	0	0	3040	0	0	0	3324	0	0	0
1:97547956	G/A	DPYD	missense_variant	NM_000110.3:c.2837C>T	NP_000101.2:p.Ala946Val	6 of 6 Predicted as Damaging	9.624	1	20.0954	27											rs753950237	1	PASS	143226	6.98197e-06	1	0	0	0	900	0	0	0	2154	0	0	0	42040	0	0	0	3048	0	0	0	3322	0	0	0
1:97547987	C/A	DPYD	missense_variant	NM_000110.3:c.2806G>T	NP_000101.2:p.Gly936Cys	6 of 6 Predicted as Damaging	4.042	1	10.9864	23.9											rs137878450	1	PASS	143236	4.18889e-05	6	0	0	0	900	0	0	0	2152	0	0	0	42032	0	0	0	3034	0	0	0	3322	0	0	0
1:97548027	C/T	DPYD	splice_acceptor_variant	NM_000110.3:c.2767-1G>A		2 of 6 Predicted as Damaging	6.889	1	20.0954	28.4	0.999956	0.952	Likely Pathogenic	(1 Stars) Criteria Provided, Single Submitter							rs377221676	1	PASS	143188	6.98383e-06	1	0	0	0	900	0	0	0	2146	0	0	0	42016	0	0	0	3040	0	0	0	3322	0	0	0
1:97564044	C/T	DPYD	splice_donor_variant	NM_000110.3:c.2766+1G>A		2 of 6 Predicted as Damaging	5.334	1	18.2848	32	0.99998	0.936									rs1355754530	1	PASS	143036	1.39825e-05	2	0	0	0	900	0	0	0	2148	0	0	0	41976	0	0	0	3032	0	0	0	3322	0	0	0
1:97564049	A/T	DPYD	missense_variant	NM_000110.3:c.2762T>A	NP_000101.2:p.Ile921Asn	6 of 6 Predicted as Damaging	6.365	1	14.7536	25.5											rs771930534	1	PASS	143200	6.98324e-06	1	0	0	0	898	0	0	0	2146	0	0	0	42040	0	0	0	3042	0	0	0	3320	0	0	0
1:97564116	C/A	DPYD	stop_gained	NM_000110.3:c.2695G>T	NP_000101.2:p.Glu899Ter	2 of 6 Predicted as Damaging	1.116	0.988	18.2848	40											rs1484757629	1	PASS	143154	6.98548e-06	1	0	0	0	900	0	0	0	2148	0	0	0	42030	0	0	0	3046	0	0	0	3322	0	0	0
1:97564152	T/A	DPYD	stop_gained	NM_000110.3:c.2659A>T	NP_000101.2:p.Lys887Ter	2 of 6 Predicted as Damaging	3.877	1	11.7831	39												1	PASS	143222	6.98217e-06	1	0	0	0	900	0	0	0	2152	0	0	0	42044	0	0	0	3048	0	0	0	3322	0	0	0
1:97564158	G/A	DPYD	stop_gained	NM_000110.3:c.2653C>T	NP_000101.2:p.Gln885Ter	2 of 6 Predicted as Damaging	2.361	0.983	10.4973	37											rs771839581	1	PASS	143136	1.39727e-05	2	0	0	0	900	0	0	0	2152	0	0	0	42006	0	0	0	3038	0	0	0	3324	0	0	0
1:97658633	TGAGTTCAGCTATACG/-	DPYD	frameshift_variant	NM_000110.3:c.2599_2614del	NP_000101.2:p.Arg867Trpfs*19					35											rs1348484901	1	PASS	143326	2.09313e-05	3	0	0	0	900	0	0	0	2152	0	0	3	42054	7.13369e-05	0	0	3052	0	0	0	3320	0	0	0
1:97658667	C/-	DPYD	frameshift_variant	NM_000110.3:c.2580delG	NP_000101.2:p.Lys863Asnfs*6					27.2												1	PASS	143330	6.27922e-05	9	0	0	0	900	0	0	1	2152	0.000464684	0	2	42058	4.75534e-05	0	0	3052	0	0	0	3320	0	0	0
1:97658668	T/C	DPYD	missense_variant	NM_000110.3:c.2579A>G	NP_000101.2:p.Gln860Arg	6 of 6 Predicted as Damaging	6.916	1	16.4447	28.6											rs1337814933	1	PASS	143286	6.97905e-06	1	0	0	0	900	0	0	0	2150	0	0	0	42048	0	0	0	3050	0	0	0	3322	0	0	0
1:97658686	G/C	DPYD	missense_variant	NM_000110.3:c.2561C>G	NP_000101.2:p.Pro854Arg	6 of 6 Predicted as Damaging	8.487	1	20.0869	29.4											rs1378867807	1	PASS	143242	6.98119e-06	1	0	0	0	900	0	0	0	2152	0	0	0	42038	0	0	0	3044	0	0	0	3324	0	0	0
1:97658696	C/T	DPYD	missense_variant	NM_000110.3:c.2551G>A	NP_000101.2:p.Gly851Arg	6 of 6 Predicted as Damaging	6.728	1	20.0869	32												1	PASS	143282	6.97924e-06	1	0	0	0	900	0	0	0	2152	0	0	0	42040	0	0	0	3044	0	0	0	3324	0	0	0
1:97658698	T/C	DPYD	missense_variant	NM_000110.3:c.2549A>G	NP_000101.2:p.Asp850Gly	6 of 6 Predicted as Damaging	6.916	1	16.4447	28.4											rs765075551	1	PASS	143300	6.97837e-06	1	0	0	0	900	0	0	0	2154	0	0	0	42050	0	0	0	3048	0	0	0	3322	0	0	0
1:97658762	C/T	DPYD	missense_variant	NM_000110.3:c.2485G>A	NP_000101.2:p.Asp829Asn	6 of 6 Predicted as Damaging	6.728	1	20.4192	33											rs199777072	1	PASS	143290	0.00127015	182	4	0	0	900	0	0	0	2152	0	0	0	42046	0	0	0	3044	0	0	0	3322	0	0	0
1:97658805	C/A	DPYD	splice_acceptor_variant	NM_000110.3:c.2443-1G>T		2 of 6 Predicted as Damaging	6.728	1	20.4192	33	0.999956	0.946									rs1319681736	1	PASS	143260	1.39606e-05	2	0	0	0	900	0	0	0	2154	0	0	2	42030	4.75851e-05	0	0	3036	0	0	0	3318	0	0	0
1:97700407	C/A	DPYD	splice_donor_variant	NM_000110.3:c.2442+1G>T		2 of 6 Predicted as Damaging	7.487	1	19.9382	32	0.999989	0.924									rs1252510761	1	PASS	143178	6.98431e-06	1	0	0	0	900	0	0	0	2142	0	0	0	41998	0	0	0	3030	0	0	0	3318	0	0	0
1:97700476	C/A	DPYD	missense_variant	NM_000110.3:c.2374G>T	NP_000101.2:p.Ala792Ser	6 of 6 Predicted as Damaging	7.487	1	19.9382	29.7												1	PASS	143172	6.98461e-06	1	0	0	0	900	0	0	0	2150	0	0	0	41988	0	0	0	3024	0	0	0	3320	0	0	0
1:97700485	G/A	DPYD	missense_variant	NM_000110.3:c.2365C>T	NP_000101.2:p.Pro789Ser	6 of 6 Predicted as Damaging	7.654	1	19.9382	24.8											rs267598785	1	PASS	143240	6.98129e-06	1	0	0	0	900	0	0	0	2150	0	0	0	42014	0	0	0	3044	0	0	0	3320	0	0	0
1:97700529	G/A	DPYD	missense_variant	NM_000110.3:c.2321C>T	NP_000101.2:p.Ala774Val	6 of 6 Predicted as Damaging	7.628	1	19.9186	32												1	PASS	143218	1.39647e-05	2	0	0	0	900	0	0	0	2154	0	0	0	42010	0	0	1	3042	0.000328731	0	0	3324	0	0	0
1:97700530	C/T	DPYD	missense_variant	NM_000110.3:c.2320G>A	NP_000101.2:p.Ala774Thr	6 of 6 Predicted as Damaging	3.805	1	19.9187	32											rs1304906107	1	PASS	143202	6.98314e-06	1	0	0	0	898	0	0	0	2154	0	0	1	41986	2.38175e-05	0	0	3042	0	0	0	3324	0	0	0
1:97700551	C/G	DPYD	splice_acceptor_variant	NM_000110.3:c.2300-1G>C		2 of 6 Predicted as Damaging	7.487	1	19.9187	33	0.999989	0.946									rs984858263	1	PASS	143276	6.97954e-06	1	0	0	0	900	0	0	0	2154	0	0	1	42032	2.37914e-05	0	0	3048	0	0	0	3324	0	0	0
1:97770904	G/A	DPYD	missense_variant	NM_000110.3:c.2210C>T	NP_000101.2:p.Thr737Ile	6 of 6 Predicted as Damaging	9.416	1	19.8696	28.1											rs570122671	1	PASS	143036	2.09737e-05	3	0	0	0	900	0	0	0	2148	0	0	0	41996	0	0	0	3032	0	0	0	3318	0	0	0
1:97771771	A/G	DPYD	missense_variant	NM_000110.3:c.2141T>C	NP_000101.2:p.Val714Ala	6 of 6 Predicted as Damaging	8.925	1	16.6512	27.9											rs569661196	1	PASS	143086	2.79552e-05	4	0	0	0	900	0	0	0	2148	0	0	0	42012	0	0	0	3048	0	0	0	3322	0	0	0
1:97771777	G/A	DPYD	missense_variant	NM_000110.3:c.2135C>T	NP_000101.2:p.Pro712Leu	6 of 6 Predicted as Damaging	9.437	1	20.6721	32												1	PASS	142988	6.99359e-06	1	0	0	0	900	0	0	0	2144	0	0	1	41956	2.38345e-05	0	0	3044	0	0	0	3318	0	0	0
1:97771821	C/T	DPYD	stop_gained	NM_000110.3:c.2091G>A	NP_000101.2:p.Trp697Ter	2 of 6 Predicted as Damaging	7.458	1	20.6721	47											rs753296078	1	PASS	143028	6.99164e-06	1	0	0	0	900	0	0	0	2142	0	0	0	41984	0	0	0	3042	0	0	0	3312	0	0	0
1:97771838	G/A	DPYD	missense_variant	NM_000110.3:c.2074C>T	NP_000101.2:p.Arg692Trp	6 of 6 Predicted as Damaging	4.268	1	14.5008	25.1											rs538703919	1	PASS	143002	3.49645e-05	5	0	0	0	900	0	0	0	2146	0	0	4	41988	9.52653e-05	0	1	3038	0.000329164	0	0	3316	0	0	0
1:97839151	A/G	DPYD	missense_variant	NM_000110.3:c.2024T>C	NP_000101.2:p.Met675Thr	6 of 6 Predicted as Damaging	8.482	1	16.0142	27.2												1	PASS	143284	6.97915e-06	1	0	0	0	900	0	0	0	2148	0	0	0	42044	0	0	0	3038	0	0	0	3324	0	0	0
1:97839152	T/C	DPYD	missense_variant	NM_000110.3:c.2023A>G	NP_000101.2:p.Met675Val	6 of 6 Predicted as Damaging	7.293	1	16.0142	26.1											rs763506271	1	PASS	143302	6.97827e-06	1	0	0	0	900	0	0	0	2150	0	0	1	42048	2.37823e-05	0	0	3044	0	0	0	3322	0	0	0
1:97847948	C/T	DPYD	splice_donor_variant	NM_000110.3:c.1974+1G>A		2 of 6 Predicted as Damaging	6.686	1	19.6689	34	0.999986	0.94	Uncertain Significance	(1 Stars) Criteria Provided, Single Submitter							rs772254904	1	PASS	143108	6.98773e-06	1	0	0	0	900	0	0	0	2146	0	0	0	42000	0	0	0	3038	0	0	0	3318	0	0	0
1:97847977	T/C	DPYD	missense_variant	NM_000110.3:c.1946A>G	NP_000101.2:p.Asp649Gly	6 of 6 Predicted as Damaging	6.873	1	15.8317	27.5												1	PASS	143232	6.98168e-06	1	0	0	0	900	0	0	0	2146	0	0	0	42046	0	0	0	3044	0	0	0	3324	0	0	0
1:97848018	C/A	DPYD	splice_acceptor_variant	NM_000110.3:c.1906-1G>T		2 of 6 Predicted as Damaging	6.686	1	18.9274	28.2	0.999925	0.914										1	PASS	143018	6.99213e-06	1	0	0	0	900	0	0	0	2138	0	0	0	41998	0	0	0	3034	0	0	0	3322	0	0	0
1:97915613	A/C	DPYD	splice_donor_variant	NM_000110.3:c.1905+2T>G		2 of 6 Predicted as Damaging	8.962	1	15.2709	30	0.999978	0.938									rs1287066194	1	PASS	143290	6.97885e-06	1	0	0	0	900	0	0	0	2150	0	0	1	42036	2.37891e-05	0	0	3048	0	0	0	3324	0	0	0
1:97915629	C/A	DPYD	missense_variant	NM_000110.3:c.1891G>T	NP_000101.2:p.Asp631Tyr	6 of 6 Predicted as Damaging	5.757	1	18.9863	24.6												1	PASS	143240	6.98129e-06	1	0	0	0	900	0	0	0	2152	0	0	1	42028	2.37937e-05	0	0	3044	0	0	0	3320	0	0	0
1:97915657	C/T	DPYD	stop_gained	NM_000110.3:c.1863G>A	NP_000101.2:p.Trp621Ter	2 of 6 Predicted as Damaging	7.487	1	18.9863	45			Likely Pathogenic	(1 Stars) Criteria Provided, Single Submitter	DM?	"Schizophrenia"					rs1057516388	1	PASS	143244	6.9811e-06	1	0	0	0	900	0	0	0	2154	0	0	0	42014	0	0	0	3048	0	0	0	3322	0	0	0
1:97915658	C/T	DPYD	stop_gained	NM_000110.3:c.1862G>A	NP_000101.2:p.Trp621Ter	2 of 6 Predicted as Damaging	7.487	1	18.9863	45											rs1182668539	1	PASS	143190	6.98373e-06	1	0	0	0	898	0	0	0	2152	0	0	0	42002	0	0	0	3044	0	0	0	3324	0	0	0
1:97915661	T/C	DPYD	missense_variant	NM_000110.3:c.1859A>G	NP_000101.2:p.Tyr620Cys	6 of 6 Predicted as Damaging	7.698	1	15.2709	27.5											rs748235192	1	PASS	143292	6.97876e-06	1	0	0	0	900	0	0	0	2154	0	0	0	42034	0	0	0	3050	0	0	0	3324	0	0	0
1:97915674	T/G	DPYD	missense_variant	NM_000110.3:c.1846A>C	NP_000101.2:p.Lys616Gln	6 of 6 Predicted as Damaging	7.698	1	15.2709	26.6											rs368146607	1	PASS	143336	1.39532e-05	2	0	0	0	900	0	0	0	2152	0	0	0	42058	0	0	0	3046	0	0	0	3324	0	0	0
1:97915693	A/T	DPYD	missense_variant	NM_000110.3:c.1827T>A	NP_000101.2:p.Asn609Lys	6 of 6 Predicted as Damaging	1.29	1	8.2175	24.1											rs1214738239	1	PASS	143262	6.98022e-06	1	0	0	0	900	0	0	0	2150	0	0	0	42032	0	0	0	3044	0	0	0	3322	0	0	0
1:97915694	T/C	DPYD	missense_variant	NM_000110.3:c.1826A>G	NP_000101.2:p.Asn609Ser	6 of 6 Predicted as Damaging	7.698	1	15.2709	25.5											rs763572567	1	PASS	143280	6.97934e-06	1	0	0	0	900	0	0	0	2148	0	0	0	42046	0	0	0	3044	0	0	0	3324	0	0	0
1:97915755	G/-	DPYD	frameshift_variant	NM_000110.3:c.1765delC	NP_000101.2:p.Arg589Glufs*20					39												1	PASS	143270	6.97983e-06	1	0	0	0	900	0	0	0	2152	0	0	0	42036	0	0	0	3046	0	0	0	3324	0	0	0
1:97915757	G/C	DPYD	missense_variant	NM_000110.3:c.1763C>G	NP_000101.2:p.Pro588Arg	6 of 6 Predicted as Damaging	9.476	1	18.9863	26.8											rs1334963267	1	PASS	143192	6.98363e-06	1	0	0	0	900	0	0	0	2154	0	0	0	42012	0	0	0	3042	0	0	0	3318	0	0	0
1:97915763	A/G	DPYD	missense_variant	NM_000110.3:c.1757T>C	NP_000101.2:p.Val586Ala	6 of 6 Predicted as Damaging	8.962	1	15.6991	27.6											rs374527058	1	PASS	143282	4.18755e-05	6	0	0	0	898	0	0	0	2152	0	0	1	42038	2.3788e-05	0	0	3038	0	0	0	3324	0	0	0
1:97915772	A/G	DPYD	missense_variant	NM_000110.3:c.1748T>C	NP_000101.2:p.Val583Ala	6 of 6 Predicted as Damaging	8.962	1	15.6991	26.8												1	PASS	143292	6.97876e-06	1	0	0	0	900	0	0	0	2150	0	0	0	42054	0	0	0	3046	0	0	0	3324	0	0	0
1:97981283	-/TT	DPYD	frameshift_variant	NM_000110.3:c.1738_1739dupAA	NP_000101.2:p.Asp581Argfs*4					34												1	PASS	142820	7.00182e-06	1	0	0	0	900	0	0	1	2144	0.000466418	0	0	41898	0	0	0	3016	0	0	0	3320	0	0	0
1:97981302	T/C	DPYD	missense_variant	NM_000110.3:c.1720A>G	NP_000101.2:p.Lys574Glu	6 of 6 Predicted as Damaging	7.563	1	15.6553	28.1												1	PASS	143124	6.98695e-06	1	0	0	0	900	0	0	0	2148	0	0	0	42020	0	0	0	3048	0	0	0	3320	0	0	0
1:97981377	C/G	DPYD	missense_variant	NM_000110.3:c.1645G>C	NP_000101.2:p.Ala549Pro	6 of 6 Predicted as Damaging	7.356	1	18.7723	28.3											rs140039091	1	PASS	143008	2.09778e-05	3	0	0	0	900	0	0	0	2144	0	0	1	41984	2.38186e-05	0	0	3042	0	0	0	3320	0	0	0
1:97981446	T/C	DPYD	missense_variant	NM_000110.3:c.1576A>G	NP_000101.2:p.Thr526Ala	6 of 6 Predicted as Damaging	5.629	1	15.3563	23.7												1	PASS	142722	7.00663e-06	1	0	0	0	900	0	0	0	2146	0	0	1	41862	2.3888e-05	0	0	3008	0	0	0	3320	0	0	0
1:97981450	A/C	DPYD	missense_variant	NM_000110.3:c.1572T>G	NP_000101.2:p.Phe524Leu	6 of 6 Predicted as Damaging	2.379	1	10.0572	22.1											rs777368221	1	PASS	143072	6.98949e-06	1	0	0	0	900	0	0	0	2148	0	0	0	42018	0	0	0	3040	0	0	0	3320	0	0	0
1:97981457	-/GGTA	DPYD	frameshift_variant	NM_000110.3:c.1562_1565dupTACC	NP_000101.2:p.Leu523Thrfs*8					34											rs1468744935	1	PASS	142972	6.99438e-06	1	0	0.000125691	0	900	0	0	0	2148	0	0	0	41976	0	0	0	3034	0	0	0	3322	0	0	1
1:97981464	C/A	DPYD	stop_gained	NM_000110.3:c.1558G>T	NP_000101.2:p.Glu520Ter	2 of 6 Predicted as Damaging	1.223	0.957	9.6045	36												1	PASS	143030	6.99154e-06	1	0	0	0	900	0	0	0	2150	0	0	1	41986	2.38175e-05	0	0	3042	0	0	0	3316	0	0	0
1:97981467	G/A	DPYD	missense_variant	NM_000110.3:c.1555C>T	NP_000101.2:p.Pro519Ser	6 of 6 Predicted as Damaging	7.515	1	19.0969	22.1			Uncertain Significance	(1 Stars) Criteria Provided, Single Submitter							rs672601282	1	PASS	143044	6.99086e-06	1	0	0	0	900	0	0	0	2150	0	0	0	41984	0	0	0	3042	0	0	0	3320	0	0	0
1:98015116	C/G	DPYD	missense_variant	NM_000110.3:c.1524G>C	NP_000101.2:p.Gln508His	6 of 6 Predicted as Damaging	5.732	1	20.8598	33	0.999998	0.992									rs775930761	1	PASS	143260	6.98032e-06	1	0	0	0	900	0	0	0	2152	0	0	0	42042	0	0	0	3046	0	0	0	3322	0	0	0
1:98015133	T/A	DPYD	missense_variant	NM_000110.3:c.1507A>T	NP_000101.2:p.Ile503Phe	6 of 6 Predicted as Damaging	7.641	1	16.8061	26.2											rs751104498	1	PASS	143296	6.97856e-06	1	0	0	0	900	0	0	0	2154	0	0	1	42050	2.37812e-05	0	0	3046	0	0	0	3322	0	0	0
1:98015168	T/A	DPYD	missense_variant	NM_000110.3:c.1472A>T	NP_000101.2:p.Glu491Val	6 of 6 Predicted as Damaging	7.641	1	16.8061	29.5											rs1264198400	1	PASS	143282	6.97924e-06	1	0	0	0	900	0	0	0	2150	0	0	1	42056	2.37778e-05	0	0	3044	0	0	0	3320	0	0	0
1:98015171	A/C	DPYD	missense_variant	NM_000110.3:c.1469T>G	NP_000101.2:p.Val490Gly	6 of 6 Predicted as Damaging	8.893	1	16.8061	24.6												1	PASS	143238	6.98139e-06	1	0	0	0	900	0	0	0	2148	0	0	0	42014	0	0	0	3040	0	0	0	3320	0	0	0
1:98015199	C/G	DPYD	missense_variant	NM_000110.3:c.1441G>C	NP_000101.2:p.Asp481His	6 of 6 Predicted as Damaging	7.432	1	20.8598	25.5												1	PASS	143270	6.97983e-06	1	0	0	0	900	0	0	0	2154	0	0	0	42032	0	0	0	3046	0	0	0	3322	0	0	0
1:98015202	C/T	DPYD	missense_variant	NM_000110.3:c.1438G>A	NP_000101.2:p.Gly480Ser	6 of 6 Predicted as Damaging	7.432	1	20.8598	25.3											rs745911874	1	PASS	143192	2.79345e-05	4	0	0.000125691	0	900	0	0	1	2152	0.000464684	0	0	41996	0	0	0	3036	0	0	0	3322	0	0	2
1:98015204	C/T	DPYD	missense_variant	NM_000110.3:c.1436G>A	NP_000101.2:p.Gly479Asp	6 of 6 Predicted as Damaging	7.432	1	20.8598	23.5											rs1387136531	1	PASS	143222	6.98217e-06	1	0	0	0	900	0	0	0	2152	0	0	0	41998	0	0	0	3044	0	0	0	3322	0	0	0
1:98015252	TCTGGGAGACCCCA/-	DPYD	frameshift_variant	NM_000110.3:c.1375_1388delTGGGGTCTCCCAGA	NP_000101.2:p.Trp459Serfs*9					35											rs757940841	1	PASS	143314	1.39554e-05	2	0	0	0	900	0	0	0	2152	0	0	0	42050	0	0	2	3048	0.000656168	0	0	3322	0	0	0
1:98015253	G/-	DPYD	frameshift_variant	NM_000110.3:c.1387delC	NP_000101.2:p.Glu463Lysfs*2					47												1	PASS	143260	1.39606e-05	2	0	0	0	900	0	0	0	2154	0	0	0	42032	0	0	0	3032	0	0	0	3322	0	0	0
1:98015302	T/G	DPYD	splice_acceptor_variant	NM_000110.3:c.1340-2A>C		2 of 6 Predicted as Damaging	7.641	1	16.8061	34	0.999988	0.922									rs1057516713	1	PASS	143274	6.97963e-06	1	0	0	0	900	0	0	0	2154	0	0	0	42032	0	0	0	3044	0	0	0	3322	0	0	0
1:98039355	C/A	DPYD	missense_variant	NM_000110.3:c.1300G>T	NP_000101.2:p.Val434Phe	6 of 6 Predicted as Damaging	4.608	1	12.8998	25.2											rs748620513	1	PASS	143200	6.98324e-06	1	0	0	0	900	0	0	0	2146	0	0	1	42024	2.37959e-05	0	0	3050	0	0	0	3320	0	0	0
1:98039364	C/G	DPYD	missense_variant	NM_000110.3:c.1291G>C	NP_000101.2:p.Ala431Pro	6 of 6 Predicted as Damaging	2.987	1	17.8525	29.7												1	PASS	143206	6.98295e-06	1	0	0.000125565	0	900	0	0	0	2148	0	0	0	42032	0	0	0	3044	0	0	0	3318	0	0	1
1:98039426	C/T	DPYD	missense_variant	NM_000110.3:c.1229G>A	NP_000101.2:p.Arg410Gln	6 of 6 Predicted as Damaging	7.432	1	17.8525	29.6											rs199646142	1	PASS	143118	0.00012577	18	0	0	0	900	0	0	1	2150	0.000465116	0	1	41990	2.38152e-05	0	1	3040	0.000328947	0	0	3324	0	0	0
1:98039427	G/A	DPYD	missense_variant	NM_000110.3:c.1228C>T	NP_000101.2:p.Arg410Trp	6 of 6 Predicted as Damaging	9.402	1	17.8525	33											rs528430685	1	PASS	143078	6.98919e-06	1	0	0	0	900	0	0	0	2148	0	0	0	41960	0	0	1	3040	0.000328947	0	0	3324	0	0	0
1:98039499	CA/-	DPYD	stop_gained	NM_000110.3:c.1155_1156delTG	NP_000101.2:p.Cys385Terfs					35											rs769925158	1	PASS	143252	6.98071e-06	1	0	0	0	900	0	0	0	2150	0	0	0	42050	0	0	0	3048	0	0	0	3324	0	0	0
1:98039516	G/C	DPYD	missense_variant	NM_000110.3:c.1139C>G	NP_000101.2:p.Ala380Gly	6 of 6 Predicted as Damaging	9.402	1	17.1117	24.7											rs1354585423	1	PASS	143228	6.98188e-06	1	0	0	0	900	0	0	1	2152	0.000464684	0	0	42034	0	0	0	3048	0	0	0	3322	0	0	0
1:98039528	T/G	DPYD	splice_acceptor_variant	NM_000110.3:c.1129-2A>C		2 of 6 Predicted as Damaging	7.641	1	13.7872	33	0.999988	0.928										1	PASS	143288	6.97895e-06	1	0	0	0	900	0	0	0	2154	0	0	0	42054	0	0	0	3050	0	0	0	3320	0	0	0
1:98058773	C/A	DPYD	splice_donor_variant	NM_000110.3:c.1128+1G>T		2 of 6 Predicted as Damaging	7.259	1	19.0599	34	0.99999	0.948									rs1241821694	1	PASS	143222	6.98217e-06	1	0	0	0	900	0	0	1	2150	0.000465116	0	0	42034	0	0	0	3040	0	0	0	3322	0	0	0
1:98058776	C/T	DPYD	missense_variant	NM_000110.3:c.1126G>A	NP_000101.2:p.Glu376Lys	6 of 6 Predicted as Damaging	7.259	1	19.0599	34	0.971442	0.786										1	PASS	143230	6.98178e-06	1	0	0	0	900	0	0	0	2148	0	0	1	42016	2.38005e-05	0	0	3042	0	0	0	3322	0	0	0
1:98058782	G/A	DPYD	missense_variant	NM_000110.3:c.1120C>T	NP_000101.2:p.Pro374Ser	6 of 6 Predicted as Damaging	9.185	1	19.0599	27.8											rs201785202	1	PASS	143104	4.89155e-05	7	0	0	0	900	0	0	0	2146	0	0	0	41968	0	0	0	3042	0	0	0	3320	0	0	0
1:98058788	C/T	DPYD	missense_variant	NM_000110.3:c.1114G>A	NP_000101.2:p.Ala372Thr	6 of 6 Predicted as Damaging	7.259	1	19.0599	32												1	PASS	143238	6.98139e-06	1	0	0	0	900	0	0	0	2152	0	0	1	42022	2.37971e-05	0	0	3048	0	0	0	3322	0	0	0
1:98058810	T/G	DPYD	missense_variant	NM_000110.3:c.1092A>C	NP_000101.2:p.Arg364Ser	6 of 6 Predicted as Damaging	1.837	1	10.5914	25.7											rs763008163	1	PASS	143228	3.49094e-05	5	0	0	0	898	0	0	0	2146	0	0	5	42002	0.000119042	0	0	3046	0	0	0	3320	0	0	0
1:98058829	C/T	DPYD	missense_variant	NM_000110.3:c.1073G>A	NP_000101.2:p.Arg358His	6 of 6 Predicted as Damaging	7.259	1	19.0599	32											rs573299212	1	PASS	143244	6.9811e-06	1	0	0	0	900	0	0	0	2150	0	0	0	42028	0	0	0	3050	0	0	0	3324	0	0	0
1:98058830	G/A	DPYD	missense_variant	NM_000110.3:c.1072C>T	NP_000101.2:p.Arg358Cys	6 of 6 Predicted as Damaging	4.731	1	19.0599	32											rs779557503	1	PASS	143210	6.98275e-06	1	0	0	0	900	0	0	0	2146	0	0	0	42006	0	0	1	3038	0.000329164	0	0	3322	0	0	0
1:98058839	C/T	DPYD	missense_variant	NM_000110.3:c.1063G>A	NP_000101.2:p.Gly355Arg	6 of 6 Predicted as Damaging	7.259	1	19.0599	28.2												1	PASS	143250	6.9808e-06	1	0	0	0	900	0	0	0	2150	0	0	0	42022	0	0	0	3046	0	0	0	3322	0	0	0
1:98058845	G/T	DPYD	missense_variant	NM_000110.3:c.1057C>A	NP_000101.2:p.Arg353Ser	6 of 6 Predicted as Damaging	6.067	1	9.7198	16.85									Allele A is associated with decreased activity of DPYD when assayed with fluorouracil as compared to allele G.		rs143154602	1	PASS	143208	2.09486e-05	3	0	0	0	900	0	0	0	2146	0	0	3	42008	7.1415e-05	0	0	3048	0	0	0	3322	0	0	0
1:98058851	C/G	DPYD	missense_variant	NM_000110.3:c.1051G>C	NP_000101.2:p.Ala351Pro	6 of 6 Predicted as Damaging	7.259	1	19.0599	24.9									Allele A is associated with decreased activity of DPYD when assayed with fluorouracil as compared to allele G.			1	PASS	143262	1.39604e-05	2	0	0	0	900	0	0	0	2148	0	0	1	42024	2.37959e-05	0	0	3046	0	0	0	3324	0	0	0
1:98058854	A/G	DPYD	missense_variant	NM_000110.3:c.1048T>C	NP_000101.2:p.Ser350Pro	6 of 6 Predicted as Damaging	8.687	1	12.4137	23.9			Uncertain Significance	(1 Stars) Criteria Provided, Single Submitter							rs771885007	1	PASS	143292	6.97876e-06	1	0	0	0	900	0	0	0	2152	0	0	0	42026	0	0	0	3048	0	0	0	3322	0	0	0
1:98058883	G/A	DPYD	missense_variant	NM_000110.3:c.1019C>T	NP_000101.2:p.Ala340Val	6 of 6 Predicted as Damaging	9.185	1	19.0599	29.7											rs1338778459	1	PASS	143242	6.98119e-06	1	0	0	0	900	0	0	0	2152	0	0	0	42004	0	0	1	3048	0.000328084	0	0	3322	0	0	0
1:98058895	A/G	DPYD	missense_variant	NM_000110.3:c.1007T>C	NP_000101.2:p.Ile336Thr	6 of 6 Predicted as Damaging	8.687	1	15.3933	26.9											rs756372042	1	PASS	143258	6.98041e-06	1	0	0	0	900	0	0	0	2154	0	0	0	42020	0	0	0	3044	0	0	0	3322	0	0	0
1:98058895	A/T	DPYD	missense_variant	NM_000110.3:c.1007T>A	NP_000101.2:p.Ile336Asn	6 of 6 Predicted as Damaging	8.687	1	15.3933	31											rs756372042	1	PASS	143258	6.98041e-06	1	0	0	0	900	0	0	0	2154	0	0	0	42020	0	0	0	3044	0	0	0	3322	0	0	0
1:98058936	G/T	DPYD	stop_gained	NM_000110.3:c.966C>A	NP_000101.2:p.Cys322Ter	1 of 6 Predicted as Damaging	-0.133	0.404	15.8031	35											rs768834079	1	PASS	143196	6.98344e-06	1	0	0	0	900	0	0	0	2146	0	0	0	41994	0	0	0	3040	0	0	0	3322	0	0	0
1:98058945	T/C	DPYD	splice_acceptor_variant	NM_000110.3:c.959-2A>G		2 of 6 Predicted as Damaging	7.318	1	15.3933	34	0.999988	0.932									rs577302209	1	PASS	143182	6.98412e-06	1	0	0	0	900	0	0	0	2152	0	0	0	41946	0	0	0	3050	0	0	0	3316	0	0	0
1:98060624	T/C	DPYD	missense_variant	NM_000110.3:c.949A>G	NP_000101.2:p.Ser317Gly	6 of 6 Predicted as Damaging	6.648	1	13.5118	26.8												1	PASS	143278	6.97944e-06	1	0	0	0	900	0	0	0	2150	0	0	1	42046	2.37835e-05	0	0	3050	0	0	0	3324	0	0	0
1:98060635	A/G	DPYD	missense_variant	NM_000110.3:c.938T>C	NP_000101.2:p.Val313Ala	6 of 6 Predicted as Damaging	7.753	1	13.5118	26.8											rs759967863	1	PASS	143292	1.39575e-05	2	0	0	0	900	0	0	0	2150	0	0	0	42048	0	0	0	3048	0	0	0	3318	0	0	0
1:98060650	C/-	DPYD	frameshift_variant	NM_000110.3:c.923delG	NP_000101.2:p.Asp308Alafs*6					35											rs1426881532	1	PASS	143236	6.98149e-06	1	0	0	0	900	0	0	0	2150	0	0	0	42028	0	0	1	3048	0.000328084	0	0	3320	0	0	0
1:98144659	A/G	DPYD	missense_variant	NM_000110.3:c.842T>C	NP_000101.2:p.Ile281Thr	6 of 6 Predicted as Damaging	7.089	1	16.1924	26.5											rs369103276	1	PASS	143262	6.98022e-06	1	0	0	0	900	0	0	0	2150	0	0	0	42040	0	0	0	3044	0	0	0	3324	0	0	0
1:98144730	G/T	DPYD	stop_gained	NM_000110.3:c.771C>A	NP_000101.2:p.Cys257Ter	2 of 6 Predicted as Damaging	1.631	1	7.7726	35											rs754745863	1	PASS	142972	1.39888e-05	2	0	0	0	900	0	0	0	2144	0	0	0	41938	0	0	0	3038	0	0	0	3322	0	0	0
1:98144740	T/C	DPYD	splice_acceptor_variant	NM_000110.3:c.763-2A>G		2 of 6 Predicted as Damaging	6.112	1	16.1924	27	0.999965	0.936	Likely Pathogenic	(1 Stars) Criteria Provided, Single Submitter							rs1300669537	1	PASS	143274	1.39593e-05	2	0	0	0	900	0	0	0	2148	0	0	1	42046	2.37835e-05	0	0	3048	0	0	0	3320	0	0	0
1:98157325	G/C	DPYD	missense_variant	NM_000110.3:c.710C>G	NP_000101.2:p.Pro237Arg	6 of 6 Predicted as Damaging	9.375	1	18.7184	26.2												1	PASS	142914	6.99722e-06	1	0	0	0	900	0	0	0	2148	0	0	0	41886	0	0	0	3018	0	0	0	3322	0	0	0
1:98164906	C/T	DPYD	splice_donor_variant	NM_000110.3:c.680+1G>A		2 of 6 Predicted as Damaging	5.747	1	19.4065	34	0.999987	0.932	Likely Pathogenic	(1 Stars) Criteria Provided, Single Submitter							rs867460475	1	PASS	143136	1.39727e-05	2	0	0.000125691	0	900	0	0	0	2150	0	0	0	41998	0	0	0	3044	0	0	0	3320	0	0	1
1:98164934	T/C	DPYD	missense_variant	NM_000110.3:c.653A>G	NP_000101.2:p.Glu218Gly	6 of 6 Predicted as Damaging	7.664	1	15.6136	29.6											rs758699471	1	PASS	143224	1.39641e-05	2	0	0	0	900	0	0	0	2150	0	0	0	42014	0	0	0	3044	0	0	0	3324	0	0	0
1:98164979	G/A	DPYD	missense_variant	NM_000110.3:c.608C>T	NP_000101.2:p.Ala203Val	6 of 6 Predicted as Damaging	9.431	1	19.3869	28.4											rs1372761070	1	PASS	143128	2.7947e-05	4	0	0	0	900	0	0	0	2146	0	0	0	42002	0	0	0	3036	0	0	0	3322	0	0	0
1:98165006	C/A	DPYD	missense_variant	NM_000110.3:c.581G>T	NP_000101.2:p.Gly194Val	6 of 6 Predicted as Damaging	7.454	1	19.387	27.5											rs751841116	1	PASS	143126	6.98685e-06	1	0	0	0	900	0	0	0	2148	0	0	0	42000	0	0	0	3048	0	0	0	3324	0	0	0
1:98165007	C/T	DPYD	missense_variant	NM_000110.3:c.580G>A	NP_000101.2:p.Gly194Ser	6 of 6 Predicted as Damaging	5.755	1	19.387	28.3											rs1195450864	1	PASS	143112	6.98753e-06	1	0	0	0	900	0	0	0	2140	0	0	0	42006	0	0	0	3036	0	0	0	3324	0	0	0
1:98165015	G/T	DPYD	missense_variant	NM_000110.3:c.572C>A	NP_000101.2:p.Ala191Asp	6 of 6 Predicted as Damaging	7.619	1	14.32	25.7												1	PASS	143136	6.98636e-06	1	0	0	0	900	0	0	0	2146	0	0	1	42018	2.37993e-05	0	0	3046	0	0	0	3322	0	0	0
1:98165040	-/T	DPYD	frameshift_variant	NM_000110.3:c.547_548insA	NP_000101.2:p.Ser183Tyrfs*2					24.6												1	PASS	143076	6.98929e-06	1	0	0	0	900	0	0	0	2150	0	0	1	41992	2.38141e-05	0	0	3042	0	0	0	3322	0	0	0
1:98165067	G/T	DPYD	missense_variant	NM_000110.3:c.520C>A	NP_000101.2:p.Pro174Thr	6 of 6 Predicted as Damaging	9.431	1	19.3869	24.9												1	PASS	143138	6.98627e-06	1	0	0	0	900	0	0	0	2150	0	0	1	42012	2.38027e-05	0	0	3034	0	0	0	3324	0	0	0
1:98165071	T/G	DPYD	missense_variant	NM_000110.3:c.516A>C	NP_000101.2:p.Arg172Ser	6 of 6 Predicted as Damaging	0.195	0.99	9.3479	23.5											rs1299283418	1	PASS	143208	2.09486e-05	3	0	0	0	900	0	0	0	2154	0	0	3	42046	7.13504e-05	0	0	3038	0	0	0	3322	0	0	0
1:98165081	-/TGGATACTCATTGCTT	DPYD	frameshift_variant	NM_000110.3:c.506_507ins(16)	NP_000101.2:p.Gln170Serfs*20					26.9												1	PASS	143124	6.98695e-06	1	0	0	0	898	0	0	0	2152	0	0	0	42008	0	0	0	3036	0	0	0	3322	0	0	0
1:98186484	T/A	DPYD	splice_acceptor_variant	NM_000110.3:c.483+582A>T		0 of 6 Predicted as Damaging	0.668	0.001	5.5665	3.981	4.87698e-05	0.002										1	PASS	142896	6.9981e-06	1	0	0	0	898	0	0	0	2142	0	0	1	42004	2.38073e-05	0	0	3040	0	0	0	3318	0	0	0
1:98187065	C/A	DPYD	splice_donor_variant	NM_000110.3:c.483+1G>T		2 of 6 Predicted as Damaging	7.433	1	20.2381	34	0.99999	0.938	Likely Pathogenic	(1 Stars) Criteria Provided, Single Submitter							rs1057516763	1	PASS	142734	7.00604e-06	1	0	0	0	900	0	0	0	2140	0	0	0	41938	0	0	0	3044	0	0	0	3312	0	0	0
1:98187082	T/C	DPYD	missense_variant	NM_000110.3:c.467A>G	NP_000101.2:p.Gln156Arg	6 of 6 Predicted as Damaging	7.642	1	16.2965	28											rs536577604	1	PASS	142798	1.40058e-05	2	0	0	0	900	0	0	0	2142	0	0	0	41962	0	0	2	3036	0.000658762	0	0	3314	0	0	0
1:98187128	T/C	DPYD	missense_variant	NM_000110.3:c.421A>G	NP_000101.2:p.Asn141Asp	6 of 6 Predicted as Damaging	7.642	1	16.2965	27.3												1	PASS	142800	7.0028e-06	1	0	0	0	900	0	0	0	2138	0	0	0	41976	0	0	0	3040	0	0	0	3316	0	0	0
1:98187155	T/A	DPYD	missense_variant	NM_000110.3:c.394A>T	NP_000101.2:p.Thr132Ser	6 of 6 Predicted as Damaging	7.642	1	16.6245	26.1											rs538336580	1	PASS	142824	7.00162e-06	1	0	0	0	900	0	0	0	2144	0	0	0	41982	0	0	1	3046	0.000328299	0	0	3318	0	0	0
1:98187163	A/C	DPYD	missense_variant	NM_000110.3:c.386T>G	NP_000101.2:p.Val129Gly	6 of 6 Predicted as Damaging	8.896	1	16.6245	27.8											rs748320430	1	PASS	142880	6.99888e-06	1	0	0	0	900	0	0	0	2148	0	0	0	41994	0	0	0	3044	0	0	0	3318	0	0	0
1:98187189	G/T	DPYD	missense_variant	NM_000110.3:c.360C>A	NP_000101.2:p.Asn120Lys	6 of 6 Predicted as Damaging	2.078	1	12.1578	24											rs942607291	1	PASS	142702	7.00761e-06	1	0	0	0	900	0	0	0	2146	0	0	0	41924	0	0	0	3040	0	0	0	3310	0	0	0
1:98187190	T/C	DPYD	missense_variant	NM_000110.3:c.359A>G	NP_000101.2:p.Asn120Ser	6 of 6 Predicted as Damaging	7.642	1	16.6245	25.7											rs771534236	1	PASS	142738	1.40117e-05	2	0	0	0	900	0	0	0	2142	0	0	2	41950	4.76758e-05	0	0	3044	0	0	0	3316	0	0	0
1:98187224	A/T	DPYD	missense_variant	NM_000110.3:c.325T>A	NP_000101.2:p.Tyr109Asn	6 of 6 Predicted as Damaging	8.896	1	16.6245	29.1											rs1212037891	1	PASS	142890	6.99839e-06	1	0	0	0	900	0	0	0	2146	0	0	0	42004	0	0	0	3042	0	0	0	3314	0	0	0
1:98187226	-/CTCCATTAAT	DPYD	frameshift_variant	NM_000110.3:c.323_324insATTAATGGAG	NP_000101.2:p.Asn108Lysfs*10					33											rs1259735317	1	PASS	142704	7.00751e-06	1	0	0	0	898	0	0	0	2150	0	0	0	41930	0	0	0	3040	0	0	0	3312	0	0	0
1:98205983	C/G	DPYD	missense_variant	NM_000110.3:c.286G>C	NP_000101.2:p.Asp96His	6 of 6 Predicted as Damaging	5.482	1	19.8102	26.1											rs773159364	1	PASS	143154	6.98548e-06	1	0	0	0	898	0	0	0	2150	0	0	0	42014	0	0	0	3044	0	0	0	3324	0	0	0
1:98205995	G/T	DPYD	missense_variant	NM_000110.3:c.274C>A	NP_000101.2:p.Pro92Thr	6 of 6 Predicted as Damaging	9.069	1	19.5135	25.8												1	PASS	143126	6.98685e-06	1	0	0	0	900	0	0	0	2148	0	0	0	41986	0	0	0	3042	0	0	0	3318	0	0	0
1:98205997	C/A	DPYD	missense_variant	NM_000110.3:c.272G>T	NP_000101.2:p.Cys91Phe	6 of 6 Predicted as Damaging	7.172	1	19.5135	29.2											rs928681171	1	PASS	143152	2.09567e-05	3	0	0	0	900	0	0	0	2152	0	0	1	42014	2.38016e-05	0	0	3044	0	0	0	3320	0	0	0
1:98293683	G/A	DPYD	stop_gained	NM_000110.3:c.220C>T	NP_000101.2:p.Arg74Ter	2 of 6 Predicted as Damaging	4.508	1	15.8284	38			Conflicting Interpretations Of Pathogenicity	(1 Star) Criteria Provided, Conflicting Interpretations							rs189768576	1	PASS	143136	6.28773e-05	9	0	0	0	900	0	0	0	2148	0	0	2	41972	4.76508e-05	0	0	3030	0	0	0	3324	0	0	0
1:98348824	C/T	DPYD	missense_variant	NM_000110.3:c.146G>A	NP_000101.2:p.Cys49Tyr	6 of 6 Predicted as Damaging	3.772	1	17.0514	28.1												1	PASS	143068	6.98968e-06	1	0	0	0	900	0	0	1	2150	0.000465116	0	0	41978	0	0	0	3040	0	0	0	3324	0	0	0
1:98348835	AGTCCCAT/-	DPYD	frameshift_variant	NM_000110.3:c.128_135delATGGGACT	NP_000101.2:p.Asn44Terfs					28.4												1	PASS	143198	6.98334e-06	1	0	0	0	900	0	0	0	2152	0	0	0	42052	0	0	0	3046	0	0	0	3324	0	0	0
1:98348845	T/C	DPYD	missense_variant	NM_000110.3:c.125A>G	NP_000101.2:p.Lys42Arg	6 of 6 Predicted as Damaging	5.491	1	13.7342	26.5												1	PASS	143188	6.98383e-06	1	0	0	0	900	0	0	0	2154	0	0	1	42044	2.37846e-05	0	0	3040	0	0	0	3322	0	0	0
1:98348893	G/A	DPYD	missense_variant	NM_000110.3:c.77C>T	NP_000101.2:p.Ala26Val	6 of 6 Predicted as Damaging	6.717	1	17.0514	26.5											rs1182593368	1	PASS	143138	6.98627e-06	1	0	0	0	896	0	0	0	2152	0	0	0	42028	0	0	0	3042	0	0	0	3320	0	0	0
1:98348916	-/A	DPYD	stop_gained	NM_000110.3:c.54_55insT	NP_000101.2:p.Asn19Terfs					27.5												1	PASS	143212	6.98266e-06	1	0	0	0	900	0	0	0	2154	0	0	1	42044	2.37846e-05	0	0	3044	0	0	0	3322	0	0	0
1:98386443	G/C	DPYD	missense_variant	NM_000110.3:c.36C>G	NP_000101.2:p.Ile12Met	6 of 6 Predicted as Damaging	0.79	1	7.6028	22.9											rs376273539	1	PASS	143236	6.98149e-06	1	0	0	0	898	0	0	0	2154	0	0	0	42012	0	0	0	3046	0	0	0	3324	0	0	0
1:169483575	T/A	F5	missense_variant	NM_000130.4:c.6651A>T	NP_000121.2:p.Glu2217Asp	6 of 6 Predicted as Damaging	0.11	0.991	9.9786	23.3											rs561026191	1	PASS	142738	1.40117e-05	2	0	0	0	898	0	0	0	2144	0	0	0	41830	0	0	0	3020	0	0	0	3322	0	0	0
1:169483582	C/T	F5	missense_variant	NM_000130.4:c.6644G>A	NP_000121.2:p.Arg2215His	6 of 6 Predicted as Damaging	6.309	1	18.0692	32											rs952196842	1	PASS	143064	6.98988e-06	1	0	0	0	900	0	0	0	2146	0	0	0	41954	0	0	0	3034	0	0	0	3318	0	0	0
1:169483630	C/G	F5	missense_variant	NM_000130.4:c.6596G>C	NP_000121.2:p.Arg2199Thr	6 of 6 Predicted as Damaging	6.459	1	18.0692	26.5											rs748029037	1	PASS	143186	1.39678e-05	2	0	0	0	900	0	0	0	2150	0	0	2	42008	4.761e-05	0	0	3044	0	0	0	3320	0	0	0
1:169483698	C/A	F5	splice_acceptor_variant	NM_000130.4:c.6529-1G>T		2 of 6 Predicted as Damaging	4.794	1	18.4709	29	0.999938	0.94									rs547102775	1	PASS	143162	6.98509e-06	1	0	0	0	900	0	0	0	2152	0	0	1	42004	2.38073e-05	0	0	3044	0	0	0	3320	0	0	0
1:169484782	G/A	F5	missense_variant	NM_000130.4:c.6428C>T	NP_000121.2:p.Ser2143Phe	6 of 6 Predicted as Damaging	5.221	1	16.1449	24.4											rs1180688848	1	PASS	143210	6.98275e-06	1	0	0	0	898	0	0	0	2150	0	0	0	42024	0	0	0	3044	0	0	0	3322	0	0	0
1:169484803	A/G	F5	missense_variant	NM_000130.4:c.6407T>C	NP_000121.2:p.Ile2136Thr	6 of 6 Predicted as Damaging	7.694	1	15.4539	23.4											rs892889950	1	PASS	143208	6.98285e-06	1	0	0	0	900	0	0	0	2148	0	0	0	42000	0	0	0	3040	0	0	0	3324	0	0	0
1:169484809	G/A	F5	missense_variant	NM_000130.4:c.6401C>T	NP_000121.2:p.Thr2134Met	6 of 6 Predicted as Damaging	6.24	1	19.223	25.2											rs199601865	1	PASS	143100	0.000153739	22	0	0.000377929	0	898	0	0	0	2146	0	0	1	41970	2.38265e-05	0	0	3034	0	0	1	3324	0.000300842	0	4
1:169487675	C/T	F5	missense_variant	NM_000130.4:c.6320G>A	NP_000121.2:p.Gly2107Glu	6 of 6 Predicted as Damaging	6.691	1	17.5417	29.4											rs780611660	1	PASS	143232	6.98168e-06	1	0	0.000125597	0	900	0	0	0	2150	0	0	0	42026	0	0	0	3032	0	0	0	3324	0	0	1
1:169487790	G/A	F5	missense_variant	NM_000130.4:c.6205C>T	NP_000121.2:p.Pro2069Ser	6 of 6 Predicted as Damaging	8.432	1	17.522	28.6											rs564167068	1	PASS	143150	2.0957e-05	3	0	0	0	900	0	0	0	2154	0	0	0	41984	0	0	0	3034	0	0	0	3324	0	0	0
1:169487799	A/G	F5	missense_variant	NM_000130.4:c.6196T>C	NP_000121.2:p.Cys2066Arg	6 of 6 Predicted as Damaging	7.982	1	14.1268	28.1											rs376834131	1	PASS	143256	6.98051e-06	1	0	0	0	900	0	0	0	2152	0	0	0	42026	0	0	0	3042	0	0	0	3322	0	0	0
1:169489769	C/A	F5	missense_variant	NM_000130.4:c.6182G>T	NP_000121.2:p.Cys2061Phe	6 of 6 Predicted as Damaging	6.745	1	19.6581	29												1	PASS	143280	6.97934e-06	1	0	0	0	900	0	0	0	2152	0	0	0	42024	0	0	0	3046	0	0	0	3318	0	0	0
1:169489787	C/T	F5	missense_variant	NM_000130.4:c.6164G>A	NP_000121.2:p.Arg2055Gln	6 of 6 Predicted as Damaging	6.745	1	19.6581	32			Uncertain Significance	(1 Stars) Criteria Provided, Single Submitter							rs886045542	1	PASS	143222	2.09465e-05	3	0	0	0	900	0	0	1	2152	0.000464684	0	1	42008	2.3805e-05	0	1	3040	0.000328947	0	0	3322	0	0	0
1:169489788	G/A	F5	stop_gained	NM_000130.4:c.6163C>T	NP_000121.2:p.Arg2055Ter	2 of 6 Predicted as Damaging	8.508	1	19.6581	52											rs199690772	1	PASS	143200	1.39665e-05	2	0	0	0	900	0	0	0	2152	0	0	1	41996	2.38118e-05	0	0	3046	0	0	0	3322	0	0	0
1:169489805	T/C	F5	missense_variant	NM_000130.4:c.6146A>G	NP_000121.2:p.Tyr2049Cys	6 of 6 Predicted as Damaging	3.124	1	11.8357	25.7											rs755294580	1	PASS	143318	6.97749e-06	1	0	0	0	900	0	0	0	2152	0	0	0	42052	0	0	0	3052	0	0	0	3322	0	0	0
1:169489860	G/A	F5	stop_gained	NM_000130.4:c.6091C>T	NP_000121.2:p.Gln2031Ter	1 of 6 Predicted as Damaging	-0.68		8.1333	36												1	PASS	143222	6.98217e-06	1	0	0	0	898	0	0	0	2148	0	0	0	42040	0	0	0	3046	0	0	0	3316	0	0	0
1:169492444	T/-	F5	frameshift_variant	NM_000130.4:c.6039delA	NP_000121.2:p.Asn2014Metfs*2					15.88												1	PASS	143304	6.97817e-06	1	0	0	0	900	0	0	0	2150	0	0	0	42052	0	0	0	3038	0	0	0	3322	0	0	0
1:169492529	A/G	F5	missense_variant	NM_000130.4:c.5954T>C	NP_000121.2:p.Leu1985Pro	6 of 6 Predicted as Damaging	4.571	1	15.9058	31												1	PASS	143304	6.97817e-06	1	0	0	0	900	0	0	0	2150	0	0	1	42048	2.37823e-05	0	0	3042	0	0	0	3320	0	0	0
1:169492550	G/A	F5	missense_variant	NM_000130.4:c.5933C>T	NP_000121.2:p.Thr1978Ile	6 of 6 Predicted as Damaging	6.119	1	19.76	26.7											rs768425862	1	PASS	143278	1.39589e-05	2	0	0	0	900	0	0	0	2152	0	0	1	42040	2.37869e-05	0	0	3048	0	0	0	3324	0	0	0
1:169492556	A/T	F5	missense_variant	NM_000130.4:c.5927T>A	NP_000121.2:p.Ile1976Asn	6 of 6 Predicted as Damaging	8.646	1	11.4575	27.6											rs1351801804	1	PASS	143294	2.0936e-05	3	0	0	0	900	0	0	0	2154	0	0	0	42034	0	0	0	3046	0	0	0	3322	0	0	0
1:169492560	C/G	F5	missense_variant	NM_000130.4:c.5923G>C	NP_000121.2:p.Gly1975Arg	6 of 6 Predicted as Damaging	4.065	0.999	19.76	25.3											rs146312772	1	PASS	143290	9.7704e-05	14	0	0	0	900	0	0	0	2152	0	0	0	42058	0	0	0	3038	0	0	13	3324	0.00391095	0	0
1:169492587	C/T	F5	missense_variant	NM_000130.4:c.5896G>A	NP_000121.2:p.Asp1966Asn	6 of 6 Predicted as Damaging	5.534	1	15.0121	26.2												1	PASS	143256	1.3961e-05	2	0	0	0	900	0	0	0	2146	0	0	0	42040	0	0	0	3040	0	0	0	3324	0	0	0
1:169492592	T/A	F5	splice_acceptor_variant	NM_000130.4:c.5893-2A>T		2 of 6 Predicted as Damaging	6.312	1	15.9059	33	0.999988	0.928									rs1449461134	1	PASS	143304	6.97817e-06	1	0	0	0	900	0	0	0	2148	0	0	1	42062	2.37744e-05	0	0	3040	0	0	0	3324	0	0	0
1:169493046	C/T	F5	stop_gained	NM_000130.4:c.5885G>A	NP_000121.2:p.Trp1962Ter	2 of 6 Predicted as Damaging	4.895	1	20.0826	51											rs1234655743	1	PASS	143234	6.98158e-06	1	0	0	0	900	0	0	0	2146	0	0	0	42022	0	0	0	3048	0	0	0	3322	0	0	0
1:169493087	C/T	F5	stop_gained	NM_000130.4:c.5844G>A	NP_000121.2:p.Trp1948Ter	2 of 6 Predicted as Damaging	6.987	1	20.0826	49											rs1286783795	1	PASS	143304	6.97817e-06	1	0	0	0	900	0	0	0	2150	0	0	0	42038	0	0	0	3048	0	0	0	3322	0	0	0
1:169493103	C/G	F5	missense_variant	NM_000130.4:c.5828G>C	NP_000121.2:p.Gly1943Ala	6 of 6 Predicted as Damaging	6.987	1	20.0826	27.7											rs762072342	1	PASS	143310	1.39558e-05	2	0	0	0	900	0	0	0	2150	0	0	0	42046	0	0	0	3042	0	0	0	3324	0	0	0
1:169493115	A/C	F5	stop_gained	NM_000130.4:c.5816T>G	NP_000121.2:p.Leu1939Ter	2 of 6 Predicted as Damaging	8.355	1	16.1699	46											rs750570307	1	PASS	143318	1.3955e-05	2	0	0	0	900	0	0	0	2152	0	0	2	42052	4.75602e-05	0	0	3052	0	0	0	3324	0	0	0
1:169493131	G/A	F5	missense_variant	NM_000130.4:c.5800C>T	NP_000121.2:p.Pro1934Ser	6 of 6 Predicted as Damaging	7.027	1	14.808	26.1											rs766428271	1	PASS	143172	6.98461e-06	1	0	0	0	900	0	0	0	2152	0	0	1	41982	2.38197e-05	0	0	3040	0	0	0	3324	0	0	0
1:169493137	A/C	F5	missense_variant	NM_000130.4:c.5794T>G	NP_000121.2:p.Trp1932Gly	6 of 6 Predicted as Damaging	8.355	1	16.1699	31												1	PASS	143314	6.97769e-06	1	0	0	0	900	0	0	0	2150	0	0	0	42048	0	0	0	3050	0	0	0	3324	0	0	0
1:169494086	G/C	F5	stop_gained	NM_000130.4:c.5777C>G	NP_000121.2:p.Ser1926Ter	2 of 6 Predicted as Damaging	6.636	1	19.211	55											rs752595310	1	PASS	143188	6.98383e-06	1	0	0	0	900	0	0	0	2148	0	0	0	42002	0	0	1	3040	0.000328947	0	0	3318	0	0	0
1:169494087	A/T	F5	missense_variant	NM_000130.4:c.5776T>A	NP_000121.2:p.Ser1926Thr	6 of 6 Predicted as Damaging	3.505	1	15.4635	26.7											rs1439914613	1	PASS	143282	6.97924e-06	1	0	0	0	900	0	0	0	2148	0	0	0	42032	0	0	1	3046	0.000328299	0	0	3316	0	0	0
1:169494096	T/C	F5	missense_variant	NM_000130.4:c.5767A>G	NP_000121.2:p.Ile1923Val	6 of 6 Predicted as Damaging	2.883	1	7.2544	24.2												1	PASS	143258	6.98041e-06	1	0	0	0	900	0	0	0	2152	0	0	0	42016	0	0	0	3046	0	0	0	3320	0	0	0
1:169494099	G/A	F5	stop_gained	NM_000130.4:c.5764C>T	NP_000121.2:p.Gln1922Ter	2 of 6 Predicted as Damaging	4.902	1	15.9077	51											rs1180481755	1	PASS	143210	6.98275e-06	1	0	0	0	900	0	0	0	2152	0	0	1	42008	2.3805e-05	0	0	3028	0	0	0	3320	0	0	0
1:169494117	C/A	F5	missense_variant	NM_000130.4:c.5746G>T	NP_000121.2:p.Gly1916Cys	6 of 6 Predicted as Damaging	5.291	1	19.211	33											rs1332408903	1	PASS	143138	1.39725e-05	2	0	0	0	900	0	0	0	2144	0	0	2	41990	4.76304e-05	0	0	3034	0	0	0	3318	0	0	0
1:169494129	C/T	F5	missense_variant	NM_000130.4:c.5734G>A	NP_000121.2:p.Gly1912Arg	6 of 6 Predicted as Damaging	5.291	1	19.211	33												1	PASS	142986	6.99369e-06	1	0	0	0	900	0	0	0	2148	0	0	0	41926	0	0	0	3008	0	0	0	3318	0	0	0
1:169495168	AT/-	F5	frameshift_variant	NM_000130.4:c.5686_5687delAT	NP_000121.2:p.Met1896Alafs*12					29.5											rs1244504990	1	PASS	143236	6.98149e-06	1	0	0	0	900	0	0	0	2152	0	0	0	42028	0	0	0	3042	0	0	0	3318	0	0	0
1:169495199	T/G	F5	missense_variant	NM_000130.4:c.5656A>C	NP_000121.2:p.Thr1886Pro	6 of 6 Predicted as Damaging	3.614	1	16.1668	26.9												1	PASS	143296	6.97856e-06	1	0	0.000125345	0	900	0	0	0	2148	0	0	0	42054	0	0	0	3048	0	0	0	3320	0	0	1
1:169495212	C/T	F5	stop_gained	NM_000130.4:c.5643G>A	NP_000121.2:p.Trp1881Ter	2 of 6 Predicted as Damaging	0.523	0.998	6.1922	47											rs1031352699	1	PASS	143230	6.98178e-06	1	0	0	0	900	0	0	0	2152	0	0	0	42012	0	0	0	3036	0	0	0	3322	0	0	0
1:169495216	C/G	F5	missense_variant	NM_000130.4:c.5639G>C	NP_000121.2:p.Gly1880Ala	6 of 6 Predicted as Damaging	7.103	1	20.0784	28.4											rs1427318530	1	PASS	143210	6.98275e-06	1	0	0	0	900	0	0	0	2152	0	0	0	41990	0	0	0	3038	0	0	0	3322	0	0	0
1:169495230	TATGA/-	F5	frameshift_variant	NM_000130.4:c.5621_5625delTCATA	NP_000121.2:p.Met1874Serfs*33					48												1	PASS	143152	6.98558e-06	1	0	0	0	900	0	0	0	2150	0	0	0	41988	0	0	0	3032	0	0	0	3318	0	0	0
1:169495234	A/G	F5	missense_variant	NM_000130.4:c.5621T>C	NP_000121.2:p.Met1874Thr	6 of 6 Predicted as Damaging	8.49	1	16.1667	27.1			Uncertain Significance	(1 Stars) Criteria Provided, Single Submitter							rs377129476	1	PASS	143282	2.7917e-05	4	0	0	0	900	0	0	0	2154	0	0	3	42052	7.13402e-05	0	0	3044	0	0	0	3322	0	0	0
1:169495243	G/A	F5	missense_variant	NM_000130.4:c.5612C>T	NP_000121.2:p.Thr1871Ile	6 of 6 Predicted as Damaging	8.973	1	20.0784	31											rs1301207200	1	PASS	143188	6.98383e-06	1	0	0	0	900	0	0	0	2150	0	0	0	42004	0	0	0	3046	0	0	0	3324	0	0	0
1:169497218	T/C	F5	missense_variant	NM_000130.4:c.5534A>G	NP_000121.2:p.His1845Arg	6 of 6 Predicted as Damaging	7.605	1	14.9407	26.2			Uncertain Significance	(1 Stars) Criteria Provided, Single Submitter							rs200865371	1	PASS	143250	6.28272e-05	9	0	0	0	900	0	0	0	2148	0	0	0	42022	0	0	0	3046	0	0	4	3320	0.00120482	0	0
1:169497219	G/A	F5	missense_variant	NM_000130.4:c.5533C>T	NP_000121.2:p.His1845Tyr	6 of 6 Predicted as Damaging	9.355	1	18.5801	27.5												1	PASS	143260	6.98032e-06	1	0	0	0	900	0	0	0	2152	0	0	1	42028	2.37937e-05	0	0	3046	0	0	0	3324	0	0	0
1:169497276	C/T	F5	missense_variant	NM_000130.4:c.5476G>A	NP_000121.2:p.Val1826Met	6 of 6 Predicted as Damaging	7.415	1	17.6233	27.9											rs767086839	1	PASS	143282	6.97924e-06	1	0	0	0	900	0	0	0	2154	0	0	0	42046	0	0	0	3048	0	0	0	3318	0	0	0
1:169497292	C/T	F5	missense_variant	NM_000130.4:c.5460G>A	NP_000121.2:p.Met1820Ile	6 of 6 Predicted as Damaging	4.519	1	17.6233	24.8			Likely Benign	(1 Stars) Criteria Provided, Single Submitter							rs6026	1	PASS	143286	0.00773977	1109	12	0	0	900	0	0	10	2152	0.00464684	0	1051	42046	0.0249964	11	2	3044	0.00065703	0	0	3322	0	0	0
1:169497307	C/A	F5	missense_variant	NM_000130.4:c.5445G>T	NP_000121.2:p.Leu1815Phe	6 of 6 Predicted as Damaging	4.47	1	17.6233	24.8											rs758837114	1	PASS	143264	6.98012e-06	1	0	0	0	900	0	0	0	2150	0	0	0	42032	0	0	0	3034	0	0	0	3324	0	0	0
1:169498862	-/T	F5	frameshift_variant	NM_000130.4:c.5403dupA	NP_000121.2:p.Ser1802Ilefs*3					33			Likely Pathogenic	(1 Stars) Criteria Provided, Single Submitter							rs757917115	1	PASS	143212	2.0948e-05	3	0	0	0	900	0	0	0	2144	0	0	0	42028	0	0	0	3038	0	0	0	3320	0	0	0
1:169498900	G/A	F5	stop_gained	NM_000130.4:c.5365C>T	NP_000121.2:p.Arg1789Ter	1 of 6 Predicted as Damaging	0.085	0.001	9.3745	36			Pathogenic	(1 Stars) Criteria Provided, Single Submitter							rs201790842	1	PASS	143166	6.9849e-06	1	0	0	0	900	0	0	0	2154	0	0	0	41996	0	0	0	3036	0	0	0	3322	0	0	0
1:169498933	C/G	F5	missense_variant	NM_000130.4:c.5332G>C	NP_000121.2:p.Glu1778Gln	6 of 6 Predicted as Damaging	7.274	1	18.9954	28.7			Uncertain Significance	(1 Stars) Criteria Provided, Single Submitter							rs886045544	1	PASS	143266	6.98002e-06	1	0	0	0	900	0	0	0	2154	0	0	1	42046	2.37835e-05	0	0	3042	0	0	0	3324	0	0	0
1:169498963	C/A	F5	stop_gained	NM_000130.4:c.5302G>T	NP_000121.2:p.Glu1768Ter	2 of 6 Predicted as Damaging	7.274	1	18.9954	53												1	PASS	143292	6.97876e-06	1	0	0	0	900	0	0	0	2150	0	0	1	42052	2.37801e-05	0	0	3052	0	0	0	3324	0	0	0
1:169499004	C/G	F5	missense_variant	NM_000130.4:c.5261G>C	NP_000121.2:p.Gly1754Ala	6 of 6 Predicted as Damaging	5.554	1	19.3971	27											rs767869864	1	PASS	143142	6.98607e-06	1	0	0	0	900	0	0	0	2150	0	0	0	41976	0	0	0	3030	0	0	0	3324	0	0	0
1:169499026	G/T	F5	missense_variant	NM_000130.4:c.5239C>A	NP_000121.2:p.Pro1747Thr	6 of 6 Predicted as Damaging	9.197	1	19.3971	26.5												1	PASS	143240	1.39626e-05	2	0	0	0	900	0	0	0	2150	0	0	0	42026	0	0	0	3040	0	0	0	3322	0	0	0
1:169499034	A/G	F5	missense_variant	NM_000130.4:c.5231T>C	NP_000121.2:p.Leu1744Ser	6 of 6 Predicted as Damaging	8.7	1	15.6079	28.9											rs570184152	1	PASS	143274	6.97963e-06	1	0	0	0	900	0	0	0	2152	0	0	0	42036	0	0	0	3046	0	0	0	3324	0	0	0
1:169499037	C/A	F5	missense_variant	NM_000130.4:c.5228G>T	NP_000121.2:p.Gly1743Val	6 of 6 Predicted as Damaging	7.274	1	19.3971	32											rs1419944628	1	PASS	143198	6.98334e-06	1	0	0	0	900	0	0	0	2148	0	0	1	42016	2.38005e-05	0	0	3044	0	0	0	3324	0	0	0
1:169499049	T/C	F5	missense_variant	NM_000130.4:c.5216A>G	NP_000121.2:p.Asp1739Gly	6 of 6 Predicted as Damaging	7.478	1	15.6079	31											rs757244704	1	PASS	143296	6.97856e-06	1	0	0	0	900	0	0	0	2154	0	0	0	42038	0	0	0	3048	0	0	0	3324	0	0	0
1:169499050	C/T	F5	missense_variant	NM_000130.4:c.5215G>A	NP_000121.2:p.Asp1739Asn	6 of 6 Predicted as Damaging	7.274	1	19.3971	32											rs778710537	1	PASS	143252	6.98071e-06	1	0	0	0	900	0	0	0	2154	0	0	0	42036	0	0	0	3042	0	0	0	3324	0	0	0
1:169500031	A/G	F5	missense_variant	NM_000130.4:c.5201T>C	NP_000121.2:p.Val1734Ala	6 of 6 Predicted as Damaging	8.854	1	14.8217	26.4												1	PASS	143320	6.97739e-06	1	0	0	0	900	0	0	0	2150	0	0	0	42066	0	0	0	3052	0	0	0	3322	0	0	0
1:169500083	C/T	F5	missense_variant	NM_000130.4:c.5149G>A	NP_000121.2:p.Gly1717Arg	6 of 6 Predicted as Damaging	7.4	1	19.3886	27											rs376296101	1	PASS	143294	2.79146e-05	4	0	0	0	900	0	0	0	2152	0	0	3	42048	7.1347e-05	0	0	3046	0	0	0	3324	0	0	0
1:169500089	G/A	F5	stop_gained	NM_000130.4:c.5143C>T	NP_000121.2:p.Arg1715Ter	1 of 6 Predicted as Damaging	1.159	0.002	14.943	35											rs746405100	1	PASS	143262	4.88615e-05	7	0	0	0	900	0	0	0	2154	0	0	7	42038	0.000166516	0	0	3040	0	0	0	3322	0	0	0
1:169500149	T/A	F5	stop_gained	NM_000130.4:c.5083A>T	NP_000121.2:p.Lys1695Ter	2 of 6 Predicted as Damaging	0.041	0.925	19.0592	36												1	PASS	143322	6.9773e-06	1	0	0	0	898	0	0	0	2150	0	0	0	42062	0	0	0	3048	0	0	0	3324	0	0	0
1:169500208	A/G	F5	missense_variant	NM_000130.4:c.5024T>C	NP_000121.2:p.Leu1675Pro	6 of 6 Predicted as Damaging	8.893	1	15.604	29.8											rs777199135	1	PASS	143322	6.9773e-06	1	0	0	0	900	0	0	0	2150	0	0	0	42072	0	0	0	3052	0	0	0	3324	0	0	0
1:169500220	T/C	F5	missense_variant	NM_000130.4:c.5012A>G	NP_000121.2:p.His1671Arg	6 of 6 Predicted as Damaging	7.641	1	15.604	25.9											rs1326641450	1	PASS	143302	1.39565e-05	2	0	0	0	898	0	0	0	2148	0	0	1	42048	2.37823e-05	0	0	3052	0	0	0	3324	0	0	0
1:169500226	G/A	F5	missense_variant	NM_000130.4:c.5006C>T	NP_000121.2:p.Ser1669Phe	6 of 6 Predicted as Damaging	9.403	1	19.3886	31											rs1176241932	1	PASS	143298	6.97846e-06	1	0	0	0	900	0	0	0	2150	0	0	0	42064	0	0	0	3048	0	0	0	3322	0	0	0
1:169500232	G/A	F5	missense_variant	NM_000130.4:c.5000C>T	NP_000121.2:p.Pro1667Leu	6 of 6 Predicted as Damaging	7.54	1	19.3886	31											rs200157005	1	PASS	143220	6.98227e-06	1	0	0	0	900	0	0	0	2144	0	0	0	42008	0	0	0	3040	0	0	0	3322	0	0	0
1:169500247	T/C	F5	missense_variant	NM_000130.4:c.4985A>G	NP_000121.2:p.Asn1662Ser	6 of 6 Predicted as Damaging	7.579	1	15.604	26.9											rs762962271	1	PASS	143324	6.9772e-06	1	0	0	0	900	0	0	0	2150	0	0	0	42066	0	0	0	3048	0	0	0	3324	0	0	0
1:169505766	G/A	F5	missense_variant	NM_000130.4:c.4949C>T	NP_000121.2:p.Ala1650Val	6 of 6 Predicted as Damaging	9.312	1	18.6695	29.4											rs753691316	1	PASS	143186	2.79357e-05	4	0	0	0	900	0	0	0	2148	0	0	0	42018	0	0	0	3046	0	0	0	3322	0	0	0
1:169505791	C/T	F5	missense_variant	NM_000130.4:c.4924G>A	NP_000121.2:p.Gly1642Arg	6 of 6 Predicted as Damaging	7.363	1	18.6695	32											rs866997995	1	PASS	143174	2.09535e-05	3	0	0	0	900	0	0	0	2148	0	0	0	42024	0	0	0	3044	0	0	0	3322	0	0	0
1:169505808	T/C	F5	missense_variant	NM_000130.4:c.4907A>G	NP_000121.2:p.Glu1636Gly	6 of 6 Predicted as Damaging	7.57	1	15.0115	29.4											rs1260594251	1	PASS	143196	6.98344e-06	1	0	0	0	900	0	0	0	2146	0	0	1	42030	2.37925e-05	0	0	3038	0	0	0	3318	0	0	0
1:169505842	C/G	F5	missense_variant	NM_000130.4:c.4873G>C	NP_000121.2:p.Asp1625His	6 of 6 Predicted as Damaging	7.363	1	18.6695	29.3											rs914900338	1	PASS	143194	6.98353e-06	1	0	0	0	900	0	0	0	2152	0	0	1	42016	2.38005e-05	0	0	3048	0	0	0	3322	0	0	0
1:169505871	T/C	F5	missense_variant	NM_000130.4:c.4844A>G	NP_000121.2:p.Tyr1615Cys	6 of 6 Predicted as Damaging	2.354	0.98	13.9924	25.6											rs755533777	1	PASS	143292	1.39575e-05	2	0	0	0	900	0	0	0	2154	0	0	1	42046	2.37835e-05	0	0	3046	0	0	0	3322	0	0	0
1:169505919	C/T	F5	splice_acceptor_variant	NM_000130.4:c.4797-1G>A		2 of 6 Predicted as Damaging	3.866	0.988	11.643	22.9	0.999868	0.898										1	PASS	143148	6.98578e-06	1	0	0	0	898	0	0	0	2152	0	0	1	42004	2.38073e-05	0	0	3042	0	0	0	3318	0	0	0
1:169509545	AAAAGTCTGAAATTATTTTAAAATGTTCTCAT/-	F5	frameshift_variant	NM_000130.4:c.4752_4783del	NP_000121.2:p.Ala1585Ilefs*9					47												1	PASS	143260	6.98032e-06	1	0	0	0	900	0	0	0	2154	0	0	1	42040	2.37869e-05	0	0	3042	0	0	0	3322	0	0	0
1:169509578	T/G	F5	missense_variant	NM_000130.4:c.4750A>C	NP_000121.2:p.Ile1584Leu	6 of 6 Predicted as Damaging	7.038	1	15.9666	24.3											rs746032307	1	PASS	143282	2.7917e-05	4	0	0	0	900	0	0	0	2150	0	0	1	42044	2.37846e-05	0	0	3046	0	0	0	3324	0	0	0
1:169509899	C/A	F5	stop_gained	NM_000130.4:c.4429G>T	NP_000121.2:p.Glu1477Ter	2 of 6 Predicted as Damaging	4.182	1	15.8335	42												1	PASS	143204	6.98305e-06	1	0	0	0	900	0	0	0	2152	0	0	1	42002	2.38084e-05	0	0	3038	0	0	0	3320	0	0	0
1:169509927	AGAAGGGT/-	F5	stop_gained	NM_000130.4:c.4394_4401delACCCTTCT	NP_000121.2:p.Tyr1465Terfs					35											rs1468420247	1	PASS	143214	6.98256e-06	1	0	0	0	900	0	0	0	2154	0	0	0	42010	0	0	0	3038	0	0	0	3320	0	0	0
1:169510187	G/A	F5	stop_gained	NM_000130.4:c.4141C>T	NP_000121.2:p.Gln1381Ter	1 of 6 Predicted as Damaging	0.632	0.003	10.0009	35												1	PASS	143284	6.97915e-06	1	0	0	0	900	0	0	0	2152	0	0	0	42038	0	0	0	3042	0	0	0	3324	0	0	0
1:169510293	CTGA/-	F5	frameshift_variant	NM_000130.4:c.4032_4035delTCAG	NP_000121.2:p.Ser1344Argfs*24					35												1	PASS	88746	1.12681e-05	1	0	0	0	496	0	0	0	1352	0	0	0	24444	0	0	0	1736	0	0	0	2250	0	0	1
1:169510505	-/TT	F5	frameshift_variant	NM_000130.4:c.3823_3824insAA	NP_000121.2:p.Pro1275Glnfs*14					15.25												1	PASS	141776	7.05338e-06	1	0	0	0	894	0	0	0	2124	0	0	1	41374	2.41698e-05	0	0	2980	0	0	0	3310	0	0	0
1:169510736	C/A	F5	stop_gained	NM_000130.4:c.3592G>T	NP_000121.2:p.Glu1198Ter	1 of 6 Predicted as Damaging	0.227	0.061	4.723	35											rs1256362166	1	PASS	143160	6.98519e-06	1	0	0	0	900	0	0	0	2152	0	0	0	42000	0	0	0	3048	0	0	0	3318	0	0	0
1:169510790	C/A	F5	stop_gained	NM_000130.4:c.3538G>T	NP_000121.2:p.Glu1180Ter	1 of 6 Predicted as Damaging	0.644	0.49	9.7245	35											rs1449427711	1	PASS	143248	6.9809e-06	1	0	0	0	900	0	0	0	2150	0	0	0	42020	0	0	0	3038	0	0	0	3324	0	0	0
1:169511147	C/A	F5	stop_gained	NM_000130.4:c.3181G>T	NP_000121.2:p.Glu1061Ter	1 of 6 Predicted as Damaging	0.896	0.473	10.9884	37												1	PASS	143290	6.97885e-06	1	0	0	0	900	0	0	0	2152	0	0	0	42042	0	0	0	3042	0	0	0	3320	0	0	0
1:169511315	A/-	F5	frameshift_variant	NM_000130.4:c.3013delT	NP_000121.2:p.Arg1005Aspfs*7					35												1	PASS	143310	1.39558e-05	2	0	0	0	900	0	0	0	2152	0	0	1	42060	2.37756e-05	0	0	3052	0	0	0	3322	0	0	0
1:169511608	C/T	F5	stop_gained	NM_000130.4:c.2720G>A	NP_000121.2:p.Trp907Ter	1 of 6 Predicted as Damaging	-0.27		4.5699	35											rs1393213631	1	PASS	143204	6.98305e-06	1	0	0	0	900	0	0	0	2154	0	0	0	42000	0	0	0	3038	0	0	0	3322	0	0	0
1:169511929	-/T	F5	frameshift_variant	NM_000130.4:c.2399dupA	NP_000121.2:p.His800Glnfs*34					6.717												1	PASS	143268	6.97993e-06	1	0	0	0	900	0	0	0	2152	0	0	0	42046	0	0	1	3034	0.000329598	0	0	3322	0	0	0
1:169512081	T/-	F5	frameshift_variant	NM_000130.4:c.2247delA	NP_000121.2:p.Glu750Serfs*7					0.047											rs1314798108	1	PASS	142082	7.03819e-06	1	0	0	0	898	0	0	0	2126	0	0	0	40958	0	0	0	3042	0	0	0	3324	0	0	0
1:169512249	A/C	F5	stop_gained	NM_000130.4:c.2079T>G	NP_000121.2:p.Tyr693Ter	2 of 6 Predicted as Damaging	1.241	0.999	8.6719	43											rs754302727	1	PASS	143304	1.39563e-05	2	0	0	0	900	0	0	0	2154	0	0	2	42050	4.75624e-05	0	0	3046	0	0	0	3322	0	0	0
1:169512250	T/C	F5	missense_variant	NM_000130.4:c.2078A>G	NP_000121.2:p.Tyr693Cys	6 of 6 Predicted as Damaging	2.327	1	9.3158	24.5												1	PASS	143312	6.97778e-06	1	0	0	0	900	0	0	0	2152	0	0	0	42060	0	0	0	3044	0	0	0	3324	0	0	0
1:169512307	T/-	F5	frameshift_variant	NM_000130.4:c.2021delA	NP_000121.2:p.Lys674Serfs*2					25.3											rs986891825	1	PASS	143278	3.48972e-05	5	0	0	0	900	0	0	1	2154	0.000464253	0	3	42032	7.13742e-05	0	0	3048	0	0	0	3324	0	0	0
1:169512345	C/T	F5	stop_gained	NM_000130.4:c.1983G>A	NP_000121.2:p.Trp661Ter	2 of 6 Predicted as Damaging	6.105	1	20.047	51											rs1409285990	1	PASS	143226	6.98197e-06	1	0	0	0	900	0	0	0	2150	0	0	0	42022	0	0	0	3044	0	0	0	3322	0	0	0
1:169513611	T/C	F5	missense_variant	NM_000130.4:c.1898A>G	NP_000121.2:p.Tyr633Cys	6 of 6 Predicted as Damaging	4.031	1	11.2637	27.5											rs775062519	1	PASS	143288	3.48948e-05	5	0	0	0	900	0	0	0	2150	0	0	0	42046	0	0	2	3034	0.000659196	0	0	3322	0	0	0
1:169513734	T/C	F5	missense_variant	NM_000130.4:c.1775A>G	NP_000121.2:p.Tyr592Cys	6 of 6 Predicted as Damaging	1.415	0.998	11.3491	25.8												1	PASS	143326	6.9771e-06	1	0	0	0	900	0	0	0	2152	0	0	1	42058	2.37767e-05	0	0	3044	0	0	0	3318	0	0	0
1:169515695	A/G	F5	missense_variant	NM_000130.4:c.1747T>C	NP_000121.2:p.Ser583Pro	6 of 6 Predicted as Damaging	7.017	1	11.0511	31											rs1013945405	1	PASS	143282	1.39585e-05	2	0	0	0	900	0	0	0	2150	0	0	2	42044	4.75692e-05	0	0	3040	0	0	0	3322	0	0	0
1:169515709	G/C	F5	missense_variant	NM_000130.4:c.1733C>G	NP_000121.2:p.Pro578Arg	6 of 6 Predicted as Damaging	6.147	1	20.8794	27.9											rs1349312167	1	PASS	143212	1.39653e-05	2	0	0	0	900	0	0	0	2150	0	0	0	42010	0	0	0	3034	0	0	0	3320	0	0	0
1:169515719	G/A	F5	missense_variant	NM_000130.4:c.1723C>T	NP_000121.2:p.Arg575Cys	6 of 6 Predicted as Damaging	5.32	1	14.3164	31											rs750405124	1	PASS	143194	6.98353e-06	1	0	0	0	900	0	0	0	2154	0	0	0	41990	0	0	0	3042	0	0	0	3322	0	0	0
1:169515758	T/G	F5	missense_variant	NM_000130.4:c.1684A>C	NP_000121.2:p.Asn562His	6 of 6 Predicted as Damaging	7.52	1	16.8222	27.4												1	PASS	143300	6.97837e-06	1	0	0	0	900	0	0	0	2154	0	0	1	42022	2.37971e-05	0	0	3048	0	0	0	3324	0	0	0
1:169515761	C/T	F5	missense_variant	NM_000130.4:c.1681G>A	NP_000121.2:p.Asp561Asn	6 of 6 Predicted as Damaging	7.315	1	20.8794	32											rs1346072759	1	PASS	143312	6.97778e-06	1	0	0	0	900	0	0	0	2154	0	0	0	42046	0	0	0	3042	0	0	0	3318	0	0	0
1:169515768	G/T	F5	stop_gained	NM_000130.4:c.1674C>A	NP_000121.2:p.Tyr558Ter	2 of 6 Predicted as Damaging	3.143	1	11.0805	41											rs905672088	1	PASS	143234	1.39632e-05	2	0	0	0	900	0	0	0	2152	0	0	1	42018	2.37993e-05	0	0	3044	0	0	0	3322	0	0	0
1:169515775	C/T	F5	missense_variant	NM_000130.4:c.1667G>A	NP_000121.2:p.Ser556Asn	6 of 6 Predicted as Damaging	7.346	1	20.8794	28.2											rs747716745	1	PASS	143276	2.09386e-05	3	0	0	0	900	0	0	0	2154	0	0	3	42034	7.13708e-05	0	0	3048	0	0	0	3320	0	0	0
1:169515793	A/G	F5	missense_variant	NM_000130.4:c.1649T>C	NP_000121.2:p.Val550Ala	6 of 6 Predicted as Damaging	8.791	1	16.8222	27.1											rs746444205	1	PASS	143318	1.3955e-05	2	0	0	0	900	0	0	0	2154	0	0	0	42046	0	0	0	3042	0	0	0	3322	0	0	0
1:169519038	C/A	F5	splice_donor_variant	NM_000130.4:c.1611+1G>T		2 of 6 Predicted as Damaging	5.412	1	19.8398	34	0.999992	0.942										1	PASS	143294	6.97866e-06	1	0	0	0	900	0	0	1	2152	0.000464684	0	0	42026	0	0	0	3044	0	0	0	3322	0	0	0
1:169519050	G/A	F5	stop_gained	NM_000130.4:c.1600C>T	NP_000121.2:p.Gln534Ter	2 of 6 Predicted as Damaging	1.684	0.973	15.1076	38											rs770011773	1	PASS	143240	1.39626e-05	2	0	0	0	898	0	0	0	2146	0	0	0	41994	0	0	0	3048	0	0	0	3320	0	0	0
1:169519061	G/T	F5	missense_variant	NM_000130.4:c.1589C>A	NP_000121.2:p.Ser530Tyr	6 of 6 Predicted as Damaging	9.387	1	19.8398	28.5											rs1339983693	1	PASS	143286	6.97905e-06	1	0	0	0	898	0	0	0	2148	0	0	0	42034	0	0	0	3048	0	0	0	3320	0	0	0
1:169519073	C/T	F5	missense_variant	NM_000130.4:c.1577G>A	NP_000121.2:p.Cys526Tyr	6 of 6 Predicted as Damaging	7.451	1	19.8398	28.7											rs773367113	1	PASS	143280	2.79174e-05	4	0	0	0	898	0	0	0	2154	0	0	4	42036	9.51565e-05	0	0	3038	0	0	0	3322	0	0	0
1:169519079	A/G	F5	missense_variant	NM_000130.4:c.1571T>C	NP_000121.2:p.Leu524Pro	6 of 6 Predicted as Damaging	8.917	1	15.9668	27.6												1	PASS	143296	6.97856e-06	1	0	0	0	898	0	0	1	2154	0.000464253	0	0	42036	0	0	0	3044	0	0	0	3324	0	0	0
1:169519229	G/T	F5	missense_variant	NM_000130.4:c.1421C>A	NP_000121.2:p.Ala474Glu	6 of 6 Predicted as Damaging	3.329	1	16.209	25.4											rs1294080170	1	PASS	143232	6.98168e-06	1	0	0	0	900	0	0	0	2150	0	0	0	42006	0	0	0	3038	0	0	0	3324	0	0	0
1:169519954	G/C	F5	missense_variant	NM_000130.4:c.1320C>G	NP_000121.2:p.Ser440Arg	6 of 6 Predicted as Damaging	0.354	0.997	5.2934	24.2											rs768715252	1	PASS	143200	6.98324e-06	1	0	0	0	900	0	0	0	2150	0	0	1	42002	2.38084e-05	0	0	3038	0	0	0	3324	0	0	0
1:169519974	C/T	F5	missense_variant	NM_000130.4:c.1300G>A	NP_000121.2:p.Val434Met	6 of 6 Predicted as Damaging	3.013	0.996	10.1683	15.86			Uncertain Significance	(1 Stars) Criteria Provided, Single Submitter							rs574610215	1	PASS	143142	4.89025e-05	7	0	0	0	900	0	0	1	2148	0.000465549	0	1	41966	2.38288e-05	0	0	3030	0	0	1	3322	0.000301023	0	0
1:169521815	G/A	F5	stop_gained	NM_000130.4:c.1276C>T	NP_000121.2:p.Gln426Ter	2 of 6 Predicted as Damaging	9.128	1	20.073	45											rs1040732980	1	PASS	143112	6.98753e-06	1	0	0	0	900	0	0	0	2144	0	0	1	41972	2.38254e-05	0	0	3036	0	0	0	3320	0	0	0
1:169521838	A/G	F5	missense_variant	NM_000130.4:c.1253T>C	NP_000121.2:p.Ile418Thr	6 of 6 Predicted as Damaging	8.686	1	16.4025	26.6											rs765584807	1	PASS	143278	6.97944e-06	1	0	0	0	900	0	0	0	2152	0	0	1	42034	2.37903e-05	0	0	3048	0	0	0	3324	0	0	0
1:169521919	T/C	F5	missense_variant	NM_000130.4:c.1172A>G	NP_000121.2:p.Tyr391Cys	6 of 6 Predicted as Damaging	7.463	1	16.4025	27.4											rs778574920	1	PASS	143288	2.79158e-05	4	0	0	0	900	0	0	0	2152	0	0	3	42044	7.13538e-05	0	0	3042	0	0	0	3322	0	0	0
1:169521950	C/G	F5	missense_variant	NM_000130.4:c.1141G>C	NP_000121.2:p.Asp381His	6 of 6 Predicted as Damaging	3.983	1	13.6783	26.4											rs1386637285	1	PASS	143108	6.98773e-06	1	0	0	0	900	0	0	0	2152	0	0	0	41990	0	0	0	3014	0	0	0	3324	0	0	0
1:169521954	A/C	F5	missense_variant	NM_000130.4:c.1137T>G	NP_000121.2:p.His379Gln	6 of 6 Predicted as Damaging	0.529	0.999	13.1404	23												1	PASS	143282	6.97924e-06	1	0	0	0	900	0	0	0	2152	0	0	0	42032	0	0	0	3038	0	0	0	3324	0	0	0
1:169524459	A/-	F5	frameshift_variant	NM_000130.4:c.1079delT	NP_000121.2:p.Trp361Glyfs*6					25.1												1	PASS	143224	6.98207e-06	1	0	0	0	898	0	0	0	2152	0	0	1	42012	2.38027e-05	0	0	3034	0	0	0	3324	0	0	0
1:169524471	G/A	F5	missense_variant	NM_000130.4:c.1067C>T	NP_000121.2:p.Ala356Val	6 of 6 Predicted as Damaging	7.051	1	19.6703	27.7											rs1408402976	1	PASS	143164	6.985e-06	1	0	0	0	900	0	0	0	2150	0	0	0	41992	0	0	0	3036	0	0	0	3324	0	0	0
1:169524472	C/T	F5	missense_variant	NM_000130.4:c.1066G>A	NP_000121.2:p.Ala356Thr	6 of 6 Predicted as Damaging	7.041	1	19.6703	29.2											rs1261833294	1	PASS	143262	6.98022e-06	1	0	0	0	900	0	0	0	2154	0	0	0	42038	0	0	0	3048	0	0	0	3320	0	0	0
1:169524475	C/A	F5	missense_variant	NM_000130.4:c.1063G>T	NP_000121.2:p.Ala355Ser	6 of 6 Predicted as Damaging	7.041	1	19.6703	27.5												1	PASS	143260	6.98032e-06	1	0	0	0	900	0	0	0	2152	0	0	1	42038	2.3788e-05	0	0	3044	0	0	0	3320	0	0	0
1:169524477	A/G	F5	missense_variant	NM_000130.4:c.1061T>C	NP_000121.2:p.Ile354Thr	6 of 6 Predicted as Damaging	8.423	1	15.8288	27											rs373183037	1	PASS	143286	6.97905e-06	1	0	0	0	900	0	0	0	2152	0	0	0	42040	0	0	0	3042	0	0	0	3322	0	0	0
1:169524505	G/A	F5	missense_variant	NM_000130.4:c.1033C>T	NP_000121.2:p.Arg345Trp	6 of 6 Predicted as Damaging	3.779	1	9.0834	26.2											rs746260106	1	PASS	143172	4.88922e-05	7	0	0	0	900	0	0	0	2148	0	0	0	41984	0	0	0	3040	0	0	0	3322	0	0	0
1:169524552	C/A	F5	missense_variant	NM_000130.4:c.986G>T	NP_000121.2:p.Cys329Phe	6 of 6 Predicted as Damaging	6.711	1	19.8863	28.6											rs574459300	1	PASS	143180	1.39684e-05	2	0	0	0	900	0	0	0	2152	0	0	0	41968	0	0	2	3042	0.000657462	0	0	3318	0	0	0
1:169525926	C/T	F5	missense_variant	NM_000130.4:c.910G>A	NP_000121.2:p.Gly304Arg	6 of 6 Predicted as Damaging	7.456	1	20.6439	29.3											rs747353298	1	PASS	143130	6.98666e-06	1	0	0	0	900	0	0	0	2150	0	0	0	41958	0	0	0	3040	0	0	0	3322	0	0	0
1:169525944	T/C	F5	missense_variant	NM_000130.4:c.892A>G	NP_000121.2:p.Met298Val	6 of 6 Predicted as Damaging	4.81	1	16.6277	23.9											rs1226230656	1	PASS	143210	1.39655e-05	2	0	0	0	900	0	0	0	2152	0	0	0	42010	0	0	0	3044	0	0	0	3324	0	0	0
1:169525953	T/C	F5	missense_variant	NM_000130.4:c.883A>G	NP_000121.2:p.Thr295Ala	6 of 6 Predicted as Damaging	5.826	1	16.6277	24.3											rs371760153	1	PASS	143256	1.3961e-05	2	0	0	0	898	0	0	0	2152	0	0	0	42030	0	0	0	3048	0	0	0	3322	0	0	0
1:169526019	C/T	F5	missense_variant	NM_000130.4:c.817G>A	NP_000121.2:p.Gly273Ser	6 of 6 Predicted as Damaging	7.456	1	20.6439	31											rs1328429966	1	PASS	143160	2.09556e-05	3	0	0	0	898	0	0	0	2148	0	0	0	41970	0	0	0	3042	0	0	0	3324	0	0	0
1:169526102	A/G	F5	missense_variant	NM_000130.4:c.734T>C	NP_000121.2:p.Ile245Thr	6 of 6 Predicted as Damaging	8.739	0.958	16.6277	25.6											rs1475386774	1	PASS	143242	6.98119e-06	1	0	0	0	900	0	0	0	2152	0	0	0	42014	0	0	0	3046	0	0	0	3318	0	0	0
1:169528394	G/A	F5	missense_variant	NM_000130.4:c.727C>T	NP_000121.2:p.Pro243Ser	6 of 6 Predicted as Damaging	8.258	1	20.5373	24.8											rs368524944	1	PASS	143246	6.981e-06	1	0	0	0	900	0	0	0	2152	0	0	0	42030	0	0	0	3044	0	0	0	3318	0	0	0
1:169528394	G/T	F5	missense_variant	NM_000130.4:c.727C>A	NP_000121.2:p.Pro243Thr	6 of 6 Predicted as Damaging	8.258	1	20.5373	24.4											rs368524944	1	PASS	143246	6.981e-06	1	0	0	0	900	0	0	0	2152	0	0	0	42030	0	0	0	3044	0	0	0	3318	0	0	0
1:169528414	C/T	F5	missense_variant	NM_000130.4:c.707G>A	NP_000121.2:p.Gly236Glu	6 of 6 Predicted as Damaging	6.553	1	20.3921	26.2												1	PASS	143226	6.98197e-06	1	0	0	0	898	0	0	0	2154	0	0	1	42010	2.38039e-05	0	0	3042	0	0	0	3324	0	0	0
1:169528420	A/T	F5	missense_variant	NM_000130.4:c.701T>A	NP_000121.2:p.Val234Asp	6 of 6 Predicted as Damaging	7.819	1	16.4219	27.7											rs1460328378	1	PASS	143228	6.98188e-06	1	0	0	0	900	0	0	0	2152	0	0	0	42010	0	0	0	3038	0	0	0	3322	0	0	0
1:169528472	C/T	F5	missense_variant	NM_000130.4:c.649G>A	NP_000121.2:p.Val217Met	6 of 6 Predicted as Damaging	5.064	1	15.4496	27.3											rs762395683	1	PASS	143218	6.98236e-06	1	0	0	0	900	0	0	0	2150	0	0	0	42026	0	0	0	3034	0	0	0	3322	0	0	0
1:169528487	C/T	F5	missense_variant	NM_000130.4:c.634G>A	NP_000121.2:p.Val212Met	6 of 6 Predicted as Damaging	2.529	0.98	15.52	25.2											rs757503552	1	PASS	143212	6.98266e-06	1	0	0	0	898	0	0	0	2148	0	0	0	42014	0	0	0	3044	0	0	0	3322	0	0	0
1:169529827	G/T	F5	stop_gained	NM_000130.4:c.551C>A	NP_000121.2:p.Ser184Ter	2 of 6 Predicted as Damaging	9.588	1	19.1602	40												1	PASS	143172	6.98461e-06	1	0	0	0	900	0	0	0	2152	0	0	0	42008	0	0	0	3046	0	0	0	3322	0	0	0
1:169529840	C/A	F5	stop_gained	NM_000130.4:c.538G>T	NP_000121.2:p.Glu180Ter	1 of 6 Predicted as Damaging	-0.523		5.1742	35											rs143152035	1	PASS	143074	6.98939e-06	1	0	0	0	900	0	0	0	2150	0	0	1	41958	2.38334e-05	0	0	3034	0	0	0	3320	0	0	0
1:169529882	A/-	F5	frameshift_variant	NM_000130.4:c.496delT	NP_000121.2:p.Pro166Hisfs*13					24.6												1	PASS	143180	2.79369e-05	4	0	0.000377169	0	900	0	0	0	2150	0	0	0	42016	0	0	0	3038	0	0	0	3322	0	0	4
1:169529929	T/C	F5	missense_variant	NM_000130.4:c.449A>G	NP_000121.2:p.Tyr150Cys	6 of 6 Predicted as Damaging	7.813	1	15.4134	27											rs1295008658	1	PASS	143216	6.98246e-06	1	0	0	0	900	0	0	0	2150	0	0	0	42024	0	0	0	3044	0	0	0	3318	0	0	0
1:169529942	G/A	F5	stop_gained	NM_000130.4:c.436C>T	NP_000121.2:p.Arg146Ter	2 of 6 Predicted as Damaging	1.264	0.731	15.7379	38											rs767477438	1	PASS	143114	6.98744e-06	1	0	0	0	900	0	0	0	2150	0	0	0	41968	0	0	1	3034	0.000329598	0	0	3320	0	0	0
1:169529944	C/T	F5	missense_variant	NM_000130.4:c.434G>A	NP_000121.2:p.Gly145Asp	6 of 6 Predicted as Damaging	3.816	0.992	13.4586	24.5											rs752741472	1	PASS	143148	2.09573e-05	3	0	0	0	900	0	0	0	2150	0	0	0	41990	0	0	0	3026	0	0	0	3314	0	0	0
1:169529953	A/G	F5	missense_variant	NM_000130.4:c.425T>C	NP_000121.2:p.Val142Ala	6 of 6 Predicted as Damaging	9.075	0.995	15.4134	24											rs552620077	1	PASS	143188	6.98383e-06	1	0	0	0	900	0	0	0	2148	0	0	0	42002	0	0	0	3044	0	0	0	3320	0	0	0
1:169529960	C/T	F5	missense_variant	NM_000130.4:c.418G>A	NP_000121.2:p.Asp140Asn	6 of 6 Predicted as Damaging	7.598	1	14.069	25.3											rs778572956	1	PASS	143168	2.79392e-05	4	0	0	0	900	0	0	0	2150	0	0	4	41998	9.52426e-05	0	0	3040	0	0	0	3322	0	0	0
1:169541576	G/A	F5	missense_variant	NM_000130.4:c.256C>T	NP_000121.2:p.Leu86Phe	6 of 6 Predicted as Damaging	4.392	1	16.9823	26.8											rs774205060	1	PASS	143238	2.79256e-05	4	0	0	0	900	0	0	0	2148	0	0	0	42024	0	0	0	3044	0	0	0	3320	0	0	0
1:169551687	G/T	F5	missense_variant	NM_000130.4:c.232C>A	NP_000121.2:p.Pro78Thr	6 of 6 Predicted as Damaging	3.306	1	12.3091	19.6											rs1257200126	1	PASS	143164	6.985e-06	1	0	0	0	900	0	0	0	2152	0	0	0	41986	0	0	0	3046	0	0	0	3320	0	0	0
1:169551732	T/C	F5	missense_variant	NM_000130.4:c.187A>G	NP_000121.2:p.Lys63Glu	6 of 6 Predicted as Damaging	3.952	1	12.2454	25.8											rs1278612166	1	PASS	143316	6.97759e-06	1	0	0	0	900	0	0	0	2154	0	0	0	42056	0	0	0	3046	0	0	0	3322	0	0	0
1:169551762	T/C	F5	splice_acceptor_variant	NM_000130.4:c.159-2A>G		2 of 6 Predicted as Damaging	2.492	0.999	12.5111	32	0.999988	0.928										1	PASS	143276	6.97954e-06	1	0	0	0	900	0	0	0	2152	0	0	1	42052	2.37801e-05	0	0	3042	0	0	0	3320	0	0	0
1:169555465	A/G	F5	splice_donor_variant	NM_000130.4:c.158+2T>C		2 of 6 Predicted as Damaging	4.266	1	11.7925	25.9	0.879409	0.556									rs942284441	1	PASS	143194	6.98353e-06	1	0	0	0	900	0	0	0	2152	0	0	1	42000	2.38095e-05	0	0	3042	0	0	0	3320	0	0	0
1:169555470	G/C	F5	stop_gained	NM_000130.4:c.155C>G	NP_000121.2:p.Ser52Ter	1 of 6 Predicted as Damaging	0.083		4.8945	27.8											rs779040384	1	PASS	143226	6.98197e-06	1	0	0	0	900	0	0	0	2150	0	0	0	42024	0	0	0	3046	0	0	0	3320	0	0	0
1:169555513	C/A	F5	missense_variant	NM_000130.4:c.112G>T	NP_000121.2:p.Ala38Ser	6 of 6 Predicted as Damaging	3.611	0.981	14.6393	23.7											rs184663825	1	PASS	143338	0.000355802	51	1	0.00401204	0	900	0	0	1	2154	0.000464253	0	0	42056	0	0	0	3044	0	0	0	3322	0	0	40
1:169555516	C/G	F5	missense_variant	NM_000130.4:c.109G>C	NP_000121.2:p.Ala37Pro	6 of 6 Predicted as Damaging	3.611	0.986	10.064	24.5											rs1249107594	1	PASS	143342	6.97632e-06	1	0	0	0	900	0	0	0	2154	0	0	0	42066	0	0	0	3044	0	0	0	3320	0	0	0
1:169555519	C/T	F5	missense_variant	NM_000130.4:c.106G>A	NP_000121.2:p.Val36Met	6 of 6 Predicted as Damaging	0.263	0.983	9.8642	24.8											rs147487854	1	PASS	143330	0.00146515	210	0	0	0	900	0	0	6	2154	0.00278552	0	197	42060	0.00468379	0	0	3044	0	0	0	3324	0	0	0
12:21284171	G/A	SLCO1B1	splice_donor_variant	NM_006446.4:c.-62+1G>A						24	0.999994	0.762	Uncertain Significance	(1 Stars) Criteria Provided, Single Submitter							rs753044871	1	PASS	143106	2.79513e-05	4	0	0	0	900	0	0	0	2150	0	0	1	41984	2.38186e-05	0	0	3040	0	0	0	3322	0	0	0
12:21284172	T/A	SLCO1B1	splice_donor_variant	NM_006446.4:c.-62+2T>A						24	0.999994	0.764										1	PASS	143186	6.98392e-06	1	0	0	0	900	0	0	0	2148	0	0	0	42018	0	0	1	3040	0.000328947	0	0	3322	0	0	0
12:21294447	G/A	SLCO1B1	splice_acceptor_variant	NM_006446.4:c.-61-1G>A						22.8	0.999969	0.788										1	PASS	142876	6.99908e-06	1	0	0	0	900	0	0	0	2146	0	0	1	41946	2.38402e-05	0	0	3034	0	0	0	3316	0	0	0
12:21294542	G/T	SLCO1B1	stop_gained	NM_006446.4:c.34G>T	NP_006437.3:p.Glu12Ter	1 of 6 Predicted as Damaging	0.96	0.679	5.6383	32											rs756064979	1	PASS	143028	6.99164e-06	1	0	0	0	898	0	0	0	2144	0	0	1	41984	2.38186e-05	0	0	3046	0	0	0	3322	0	0	0
12:21294565	G/-	SLCO1B1	frameshift_variant	NM_006446.4:c.57delG	NP_006437.3:p.Thr21Glnfs*7					17.69											rs755776876	1	PASS	143150	6.98568e-06	1	0	0	0	898	0	0	0	2152	0	0	0	42022	0	0	0	3052	0	0	0	3320	0	0	0
12:21294593	G/A	SLCO1B1	splice_donor_variant	NM_006446.4:c.84+1G>A		2 of 6 Predicted as Damaging	3.719	1	10.8585	24.4	0.999975	0.762	Uncertain Significance	(1 Stars) Criteria Provided, Single Submitter							rs571639279	1	PASS	143028	1.39833e-05	2	0	0	0	900	0	0	0	2150	0	0	0	41986	0	0	2	3046	0.000656599	0	0	3322	0	0	0
12:21325712	-/C	SLCO1B1	frameshift_variant	NM_006446.4:c.212_213insC	NP_006437.3:p.Ser72Lysfs*3					25.8												1	PASS	143228	6.98188e-06	1	0	0	0	900	0	0	0	2152	0	0	0	42012	0	0	0	3048	0	0	0	3320	0	0	0
12:21327644	G/T	SLCO1B1	splice_donor_variant	NM_006446.4:c.359+1G>T		2 of 6 Predicted as Damaging	9.063	1	15.8963	28.5	0.999994	0.926										1	PASS	120632	8.28967e-06	1	0	0.00016469	0	872	0	0	0	1742	0	0	0	37952	0	0	0	1568	0	0	0	2838	0	0	1
12:21329710	T/G	SLCO1B1	stop_gained	NM_006446.4:c.360T>G	NP_006437.3:p.Tyr120Ter	2 of 6 Predicted as Damaging	3.633	1	9.921	38	0.0448699	0.292										1	PASS	143228	6.98188e-06	1	0	0	0	900	0	0	0	2152	0	0	0	42036	0	0	0	3046	0	0	0	3324	0	0	0
12:21329748	-/A	SLCO1B1	frameshift_variant	NM_006446.4:c.401dupA	NP_006437.3:p.Asn134Lysfs*12					34											rs1250465473	1	PASS	143180	6.98422e-06	1	0	0	0	900	0	0	0	2152	0	0	0	42042	0	0	0	3044	0	0	0	3322	0	0	0
12:21329776	TACC/-	SLCO1B1	stop_gained	NM_006446.4:c.426_429delTACC	NP_006437.3:p.Cys142Terfs					35												1	PASS	143224	6.98207e-06	1	0	0	0	900	0	0	0	2148	0	0	0	42040	0	0	0	3050	0	0	0	3322	0	0	0
12:21329832	G/T	SLCO1B1	splice_donor_variant	NM_006446.4:c.481+1G>T		2 of 6 Predicted as Damaging	4.107	1	10.71	24.6	0.999984	0.846	Likely Benign	(1 Stars) Criteria Provided, Single Submitter	DM?	"Rotor_syndrome"					rs77271279	1	PASS	143090	0.0091411	1308	21	0	0	900	0	0	13	2150	0.00604651	0	1237	41986	0.0294622	21	0	3028	0	0	0	3324	0	0	0
12:21331540	G/A	SLCO1B1	stop_gained	NM_006446.4:c.512G>A	NP_006437.3:p.Trp171Ter	2 of 6 Predicted as Damaging	9.007	1	15.813	41											rs985933022	1	PASS	143194	6.98353e-06	1	0	0	0	900	0	0	0	2152	0	0	0	42004	0	0	0	3032	0	0	0	3322	0	0	0
12:21331554	A/-	SLCO1B1	frameshift_variant	NM_006446.4:c.526delA	NP_006437.3:p.Met176Trpfs*8					5.115												1	PASS	143282	6.97924e-06	1	0	0	0	900	0	0	0	2152	0	0	0	42048	0	0	0	3048	0	0	0	3324	0	0	0
12:21331657	G/A	SLCO1B1	splice_donor_variant	NM_006446.4:c.628+1G>A		2 of 6 Predicted as Damaging	8.73	1	15.9908	27.4	0.999961	0.942									rs997762818	1	PASS	143102	2.79521e-05	4	0	0	0	900	0	0	0	2150	0	0	4	41986	9.52699e-05	0	0	3038	0	0	0	3322	0	0	0
12:21331855	G/A	SLCO1B1	splice_acceptor_variant	NM_006446.4:c.629-1G>A		2 of 6 Predicted as Damaging	8.974	1	16.1164	25.5	0.999992	0.922									rs1205419424	1	PASS	142874	1.39983e-05	2	0	0	0	898	0	0	0	2144	0	0	1	41882	2.38766e-05	0	0	3024	0	0	0	3324	0	0	0
12:21331909	TC/-	SLCO1B1	frameshift_variant	NM_006446.4:c.685_686delCT	NP_006437.3:p.Leu229Valfs*3					29.4											rs750383873	1	PASS	143174	6.98451e-06	1	0	0	0	900	0	0	0	2150	0	0	1	41998	2.38107e-05	0	0	3046	0	0	0	3322	0	0	0
12:21349909	C/T	SLCO1B1	stop_gained	NM_006446.4:c.757C>T	NP_006437.3:p.Arg253Ter	2 of 6 Predicted as Damaging	4.172	0.998	9.6757	36			Pathogenic	(1 Stars) Criteria Provided, Single Submitter	DM	"Rotor_syndrome"					rs183501729	1	PASS	143186	6.28553e-05	9	0	0	0	898	0	0	1	2148	0.000465549	0	0	42016	0	0	0	3038	0	0	0	3320	0	0	0
12:21349922	C/-	SLCO1B1	frameshift_variant	NM_006446.4:c.770delC	NP_006437.3:p.Ala257Valfs*55					29.4											rs1350319379	1	PASS	143136	6.98636e-06	1	0	0	0	900	0	0	0	2150	0	0	1	41990	2.38152e-05	0	0	3034	0	0	0	3320	0	0	0
12:21349926	G/A	SLCO1B1	stop_gained	NM_006446.4:c.774G>A	NP_006437.3:p.Trp258Ter	2 of 6 Predicted as Damaging	7.302	1	12.7505	37											rs1159011720	1	PASS	143102	6.98802e-06	1	0	0	0	900	0	0	0	2150	0	0	1	41986	2.38175e-05	0	0	3032	0	0	0	3322	0	0	0
12:21350012	-/A	SLCO1B1	frameshift_variant	NM_006446.4:c.864dupA	NP_006437.3:p.Glu289Argfs*15					23.5											rs748254586	1	PASS	142726	2.80257e-05	4	0	0	0	900	0	0	0	2148	0	0	4	41800	9.56938e-05	0	0	3018	0	0	0	3308	0	0	0
12:21350013	TTTC/-	SLCO1B1	frameshift_variant	NM_006446.4:c.861_864delTTTC	NP_006437.3:p.Arg290Lysfs*21					35												1	PASS	143226	1.39639e-05	2	0	0	0	900	0	0	0	2152	0	0	0	42022	0	0	0	3048	0	0	0	3322	0	0	0
12:21353455	T/-	SLCO1B1	frameshift_variant	NM_006446.4:c.987delT	NP_006437.3:p.Phe329Leufs*16					22.3											rs775188590	1	PASS	143118	6.98724e-06	1	0	0	0	900	0	0	0	2150	0	0	0	42004	0	0	0	3038	0	0	0	3324	0	0	0
12:21353480	-/CT	SLCO1B1	frameshift_variant	NM_006446.4:c.1009_1010dupCT	NP_006437.3:p.Tyr338Cysfs*8					16.86											rs763902580	1	PASS	143014	1.39846e-05	2	0	0	0	898	0	0	0	2148	0	0	0	41948	0	0	0	3028	0	0	0	3322	0	0	0
12:21353485	T/A	SLCO1B1	stop_gained	NM_006446.4:c.1014T>A	NP_006437.3:p.Tyr338Ter	1 of 6 Predicted as Damaging	0.429	0.228	5.7575	35											rs752570053	1	PASS	143288	6.97895e-06	1	0	0	0	900	0	0	0	2148	0	0	0	42058	0	0	0	3048	0	0	0	3322	0	0	0
12:21353607	G/A	SLCO1B1	splice_donor_variant	NM_006446.4:c.1135+1G>A		2 of 6 Predicted as Damaging	6.915	1	12.0129	26.5	0.99999	0.926									rs756393362	1	PASS	143154	2.09565e-05	3	0	0	0	900	0	0	0	2150	0	0	0	41990	0	0	2	3044	0.00065703	0	0	3322	0	0	0
12:21355478	T/-	SLCO1B1	frameshift_variant	NM_006446.4:c.1189delT	NP_006437.3:p.Ile397Leufs*6					12.19												1	PASS	143208	6.98285e-06	1	0	0	0	900	0	0	0	2152	0	0	1	42030	2.37925e-05	0	0	3048	0	0	0	3322	0	0	0
12:21355525	-/T	SLCO1B1	frameshift_variant	NM_006446.4:c.1239dupT	NP_006437.3:p.Thr414Tyrfs*18					22.8											rs1278427452	1	PASS	142988	6.99359e-06	1	0	0	0	900	0	0	0	2150	0	0	0	41958	0	0	0	3034	0	0	0	3320	0	0	0
12:21358892	T/A	SLCO1B1	stop_gained	NM_006446.4:c.1422T>A	NP_006437.3:p.Cys474Ter	2 of 6 Predicted as Damaging	3.421	1	10.5241	44											rs771009101	1	PASS	142988	6.99359e-06	1	0	0	0	900	0	0	0	2150	0	0	1	41970	2.38265e-05	0	0	3048	0	0	0	3316	0	0	0
12:21358945	-/C	SLCO1B1	frameshift_variant	NM_006446.4:c.1475dupC	NP_006437.3:p.Ser493Lysfs*4					29.5											rs755056022	1	PASS	143056	4.19416e-05	6	0	0	0	900	0	0	0	2148	0	0	6	42020	0.000142789	0	0	3048	0	0	0	3314	0	0	0
[truncated: 72 more rows]
[truncated: 15 more columns]

## Sheet: In_House_LOF
Variant Info		RefSeq Genes 105 Interim v1, NCBI				dbNSFP Functional Prediction Voting	dbNSFP Functional Predictions and Scores 2.9, GHI			CADD Scores 1.4	dbscSNV Splice Altering Predictions 1.1, GHI		ClinVar 2019-11-01, NCBI		HGMD_PRO_2019.4		PharmGKB Variants 2019-06-19, GHI				In-House Cohort					gnomAD Exomes Variant Frequencies 2.1.1, BROAD					gnomAD Genomes Variant Frequencies 3, BROAD					dbSNP 153, NCBI	Mappability_M150m2_hg19_Interval	gnomAD Exomes Variant Frequencies Subpopulations 2.1.1, BROAD
[truncated: 17 more rows]
[truncated: 55 more columns]

[truncated: 2 more sheets: DPWG_Variants, Summary]
