# Supplementary material for: Added Value of Clinical Sequencing: WGS-Based Profiling of Pharmacogenes
Source: Int J Mol Sci. 2020 Mar 26;21(7):2308. doi: 10.3390/ijms21072308 (PMC7178228; doi:10.3390/ijms21072308)
Supplement: Supplementary file 1 [file ijms-21-02308-s001.zip › Caspar_et_al_Supplementary_Table_S2.xlsx]

## Sheet: Tabelle1
Gene	ENSG-Number	ENST-Number	g.Position	Star Allele	c.DNA Change	Amino Acid Change	Identifier (dbSNP)	Function
CYP2B6	ENSG00000197408	ENST00000324071	Chr19:41512841G>T	*9	c.516G>T	p.Q172H	rs3745274	Decreased or Inactive
			Chr19:41515263A>G	*4	c.785A>G	p.K262R	rs2279343	Decreased or Inactive
			Chr19:41518221T>C	*18	c.983T>C	p.I328T	rs28399499	Decreased or Inactive
			Chr19:41522715C>A	*5	c.1459C>A, C>T	p.R487S, p.R487C	rs3211371	Normal function
CYP2C9	ENSG00000138109	ENST00000260682	Chr10:96702047C>T	*2	c.430C>T	p.R144C	rs1799853	Decreased
			Chr10:96741053A>C	*3	c.1075A>C	p.I359L	rs1057910	Decreased
			Chr10:96741058C>G	*5	c.1080C>G	p.D360E	rs28371686	Decreased
			Chr10:96740981C>T	*11	c.1003C>T	p.R335W	rs28371685	Decreased
CYP2C19	ENSG00000165841	ENST00000371321	Chr10:96541616G>A	*2	c.681G>A	p.P227=	rs4244285	Inactive
			Chr10:96540410G>A	*3	c.636G>A	p.W212*	rs4986893	Inactive
			Chr10:96522463A>G	*4	c.1A>G	p.M1V	rs28399504	Inactive
			Chr10:96612495C>T	*5	c.1297C>T	p.R433W	rs56337013	Inactive
			Chr10:96535210G>A	*6	c.395G>A	p.R132Q	rs72552267	Inactive
			Chr10:96535173T>C	*8	c.358T>C	p.W120R	rs41291556	Inactive or Decreased
			Chr10:96535246G>A	*9	c.431G>A	p.R144H	rs17884712	Decreased
			Chr10:96541615C>T	*10	c.680C>T	p.P227L	rs6413438	Decreased
			Chr10:96521657C>T	*17	c.-806C>T	p.?	rs12248560	Increased
CYP2D6	ENSG00000100197	ENST00000360608	n/a	*xN	CYP2D6 dup	p.?	n/a	Increased
			Chr22 42524244delT	*3	c.775delA (2549delA)	p.R259Gfs*2	rs35742686	Inactive
			Chr22:42524947C>T	*4	c.506-1G>A (1846G>A)	p.?	rs3892097	Inactive
			n/a	*5	CYP2D6 del	p.?	n/a	Inactive
			Chr22:42525086delA	*6	c.454delT (1707delT)	p.W152Gfs*2	rs5030655	Inactive
			Chr22:42525035C>A	*8	c.505G>T (1758G>T)	p.G169*	rs5030865	Inactive
			Chr22:42524178_42524180delTCT	*9	c.841_843delAAG (2615delAAG)	p.K281del	rs5030656	Decreased
			Chr22:42526694G>A	*10	c.100C>T	p.P34S	rs1065852	Decreased
			Chr22:42525035C>T	*14	c.505G>A (1758G>A)	p.G169R	rs5030865	Decreased
			Chr22:42525772G>A	*17	c.320C>T (1023C>T)	p.T107I	rs28371706	Decreased
			Chr22: 42523805C>T	*41	c.985+39G>A (2988G>A)	p.?	rs28371725	Decreased
CYP3A5			Chr7:99270539T>C	*3	c.219-237A>G	p.?	rs776746	Inactive
			Chr7:99262835C>T	*6	c.624G>A	p.K208=	rs10264272	Inactive
			Chr7:99250394dup	*7	c.1035_1036insT	p.T346Yfs*	rs41303343	Inactive
DPYD	ENSG00000188641	ENST00000370192	Chr1:97915614C>T	*2A	c.1905+1G>A	p.?	rs3918290	Inactive
			Chr1:97547947T>A	-	c.2846A>T	p.D949V	rs67376798	Decreased
			Chr1:97981343A>C	*13	c.1679T>G	p.I560S	rs55886062	Inactive
			Chr1:98039419C>T	-	c.1236G>A	p.E412=	rs56038477	Decreased
F5	ENSG00000198734	ENST00000367797	Chr1:169519049C>T	-	c.1601G>A	p.R534Q	rs6025	Decreased
HLA-B*5701 tagging variant in HCP5			Chr6:31431780T>G	*5701	rs2395029T>G	p.?	rs2395029	Tagging SNP
SLCO1B1	ENSG00000134538	ENST00000256958	Chr:12:21331549T>C	*5	c.521T>C	p.V174A	rs4149056	Decreased
TPMT	ENSG00000137364	ENST00000309983	Chr6:18143955C>G	*2	c.238G>C	p.A80P	rs1800462	Inactive
			Chr6:18139228C>T	*3B	c.460G>A	p.A154T	rs1800460	Inactive
			Chr6:18130918T>C	*3C	c.719A>G	p.Y240C	rs1142345	Inactive
UGT1A1	ENSG00000241635	ENST00000305208	Chr2:234668881_234668882TA[8]	*28/*37	c.-41_-40dup/c.-43_-40dup	p.?	rs3064744/rs8175347	Decreased
			Chr2:234669144G>A	*6	c.211G>A	p.G71R	rs4148323	Decreased
			Chr2:234669619C>A	*27	c.686C>A	p.P229Q	rs35350960	Decreased
VKORC1	ENSG00000167397	ENST00000394975	Chr16:31104878G>A	*2	c.174-136C>T (1173C>T)	p.?	rs9934438	Increased sensitivity (reduced gene expression)
